# Supplementary material for: Predicting Drugs Side Effects Based on Chemical-Chemical Interactions and Protein-Chemical Interactions
Source: Hindawi journal article supplement (doi:10.1155/2013/485034), 2013-01-01
Supplement: f1 [file 485034.f1.pdf]

**Supplementary Material I.** The benchmark dataset consists of structure-different 835 drug compounds and 30,114 side-effect-different virtual drugs (see Eq.2 of the paper) classified into 100 categories according to their side effects (see Eq.1 of the paper).

(1)  $\mathbb{S}_1$ : 703 drug compounds having side effect “Nausea”

|              |              |              |              |              |
|--------------|--------------|--------------|--------------|--------------|
| CID000000085 | CID000000143 | CID000000158 | CID000000159 | CID000000191 |
| CID000000206 | CID000000214 | CID000000232 | CID000000247 | CID000000271 |
| CID000000298 | CID000000444 | CID000000450 | CID000000453 | CID000000564 |
| CID000000581 | CID000000596 | CID000000598 | CID000000681 | CID000000738 |
| CID000000750 | CID000000767 | CID000000772 | CID000000807 | CID000000815 |
| CID000000838 | CID000000853 | CID000000937 | CID000000942 | CID000001003 |
| CID000001046 | CID000001065 | CID000001125 | CID000001134 | CID000001148 |
| CID000001546 | CID000001690 | CID000001775 | CID000001935 | CID000001971 |
| CID000001972 | CID000001978 | CID000001986 | CID000002021 | CID000002022 |
| CID000002082 | CID000002083 | CID000002092 | CID000002099 | CID000002123 |
| CID000002130 | CID000002131 | CID000002140 | CID000002141 | CID000002142 |
| CID000002145 | CID000002148 | CID000002153 | CID000002156 | CID000002160 |
| CID000002162 | CID000002170 | CID000002171 | CID000002173 | CID000002177 |
| CID000002179 | CID000002182 | CID000002187 | CID000002215 | CID000002216 |
| CID000002232 | CID000002244 | CID000002249 | CID000002250 | CID000002265 |
| CID000002267 | CID000002269 | CID000002274 | CID000002284 | CID000002308 |
| CID000002311 | CID000002315 | CID000002344 | CID000002349 | CID000002366 |
| CID000002369 | CID000002370 | CID000002375 | CID000002405 | CID000002431 |
| CID000002435 | CID000002441 | CID000002462 | CID000002471 | CID000002474 |
| CID000002476 | CID000002477 | CID000002478 | CID000002487 | CID000002512 |
| CID000002520 | CID000002524 | CID000002541 | CID000002550 | CID000002554 |
| CID000002559 | CID000002564 | CID000002575 | CID000002576 | CID000002578 |
| CID000002583 | CID000002585 | CID000002609 | CID000002610 | CID000002617 |
| CID000002622 | CID000002629 | CID000002631 | CID000002637 | CID000002646 |
| CID000002650 | CID000002654 | CID000002655 | CID000002656 | CID000002658 |
| CID000002662 | CID000002666 | CID000002673 | CID000002675 | CID000002676 |
| CID000002678 | CID000002708 | CID000002712 | CID000002719 | CID000002720 |
| CID000002725 | CID000002727 | CID000002732 | CID000002751 | CID000002762 |
| CID000002764 | CID000002769 | CID000002771 | CID000002781 | CID000002786 |
| CID000002794 | CID000002800 | CID000002801 | CID000002803 | CID000002806 |
| CID000002812 | CID000002818 | CID000002891 | CID000002895 | CID000002907 |
| CID000002909 | CID000002913 | CID000002949 | CID000002951 | CID000002958 |
| CID000002973 | CID000002983 | CID000002995 | CID000003007 | CID000003009 |
| CID000003015 | CID000003016 | CID000003019 | CID000003032 | CID000003040 |
| CID000003042 | CID000003043 | CID000003059 | CID000003062 | CID000003066 |
| CID000003075 | CID000003080 | CID000003100 | CID000003108 | CID000003114 |
| CID000003121 | CID000003125 | CID000003143 | CID000003152 | CID000003154 |
| CID000003156 | CID000003157 | CID000003158 | CID000003203 | CID000003222 |

|              |              |              |              |              |
|--------------|--------------|--------------|--------------|--------------|
| CID000003226 | CID000003249 | CID000003251 | CID000003255 | CID000003261 |
| CID000003278 | CID000003279 | CID000003285 | CID000003291 | CID000003292 |
| CID000003305 | CID000003308 | CID000003310 | CID000003324 | CID000003325 |
| CID000003333 | CID000003339 | CID000003340 | CID000003342 | CID000003345 |
| CID000003348 | CID000003354 | CID000003355 | CID000003366 | CID000003367 |
| CID000003372 | CID000003373 | CID000003379 | CID000003381 | CID000003385 |
| CID000003387 | CID000003393 | CID000003394 | CID000003397 | CID000003403 |
| CID000003404 | CID000003405 | CID000003406 | CID000003410 | CID000003414 |
| CID000003417 | CID000003419 | CID000003440 | CID000003446 | CID000003449 |
| CID000003454 | CID000003461 | CID000003463 | CID000003467 | CID000003475 |
| CID000003476 | CID000003478 | CID000003488 | CID000003494 | CID000003512 |
| CID000003518 | CID000003519 | CID000003559 | CID000003562 | CID000003636 |
| CID000003637 | CID000003639 | CID000003640 | CID000003647 | CID000003648 |
| CID000003652 | CID000003657 | CID000003661 | CID000003675 | CID000003676 |
| CID000003685 | CID000003690 | CID000003696 | CID000003698 | CID000003702 |
| CID000003706 | CID000003715 | CID000003724 | CID000003730 | CID000003734 |
| CID000003736 | CID000003737 | CID000003739 | CID000003741 | CID000003742 |
| CID000003746 | CID000003749 | CID000003750 | CID000003759 | CID000003763 |
| CID000003767 | CID000003779 | CID000003783 | CID000003784 | CID000003793 |
| CID000003821 | CID000003823 | CID000003825 | CID000003826 | CID000003827 |
| CID000003869 | CID000003877 | CID000003878 | CID000003883 | CID000003899 |
| CID000003902 | CID000003911 | CID000003914 | CID000003915 | CID000003928 |
| CID000003929 | CID000003937 | CID000003948 | CID000003950 | CID000003954 |
| CID000003956 | CID000003957 | CID000003958 | CID000003961 | CID000003962 |
| CID000003964 | CID000004011 | CID000004032 | CID000004033 | CID000004036 |
| CID000004044 | CID000004046 | CID000004053 | CID000004054 | CID000004057 |
| CID000004058 | CID000004060 | CID000004062 | CID000004064 | CID000004078 |
| CID000004086 | CID000004091 | CID000004095 | CID000004100 | CID000004101 |
| CID000004107 | CID000004112 | CID000004114 | CID000004121 | CID000004138 |
| CID000004140 | CID000004158 | CID000004159 | CID000004160 | CID000004163 |
| CID000004170 | CID000004171 | CID000004173 | CID000004174 | CID000004178 |
| CID000004189 | CID000004192 | CID000004195 | CID000004196 | CID000004200 |
| CID000004201 | CID000004205 | CID000004211 | CID000004212 | CID000004236 |
| CID000004253 | CID000004259 | CID000004264 | CID000004409 | CID000004411 |
| CID000004419 | CID000004421 | CID000004425 | CID000004428 | CID000004436 |
| CID000004440 | CID000004449 | CID000004451 | CID000004463 | CID000004473 |
| CID000004485 | CID000004493 | CID000004497 | CID000004506 | CID000004509 |
| CID000004510 | CID000004513 | CID000004536 | CID000004539 | CID000004542 |
| CID000004543 | CID000004547 | CID000004583 | CID000004585 | CID000004599 |
| CID000004601 | CID000004603 | CID000004607 | CID000004609 | CID000004614 |
| CID000004616 | CID000004635 | CID000004638 | CID000004645 | CID000004666 |
| CID000004679 | CID000004689 | CID000004723 | CID000004724 | CID000004727 |
| CID000004730 | CID000004736 | CID000004737 | CID000004739 | CID000004740 |
| CID000004745 | CID000004775 | CID000004819 | CID000004828 | CID000004834 |

|              |              |              |              |              |
|--------------|--------------|--------------|--------------|--------------|
| CID000004845 | CID000004856 | CID000004870 | CID000004873 | CID000004885 |
| CID000004889 | CID000004891 | CID000004893 | CID000004894 | CID000004908 |
| CID000004909 | CID000004911 | CID000004913 | CID000004914 | CID000004915 |
| CID000004919 | CID000004920 | CID000004932 | CID000004934 | CID000004943 |
| CID000004946 | CID000004976 | CID000004991 | CID000005002 | CID000005005 |
| CID000005029 | CID000005035 | CID000005038 | CID000005039 | CID000005040 |
| CID000005052 | CID000005064 | CID000005070 | CID000005071 | CID000005073 |
| CID000005076 | CID000005077 | CID000005078 | CID000005090 | CID000005095 |
| CID000005152 | CID000005155 | CID000005193 | CID000005195 | CID000005206 |
| CID000005210 | CID000005212 | CID000005215 | CID000005245 | CID000005253 |
| CID000005267 | CID000005291 | CID000005297 | CID000005300 | CID000005344 |
| CID000005352 | CID000005358 | CID000005372 | CID000005376 | CID000005379 |
| CID000005391 | CID000005394 | CID000005396 | CID000005401 | CID000005402 |
| CID000005403 | CID000005408 | CID000005412 | CID000005426 | CID000005430 |
| CID000005452 | CID000005453 | CID000005454 | CID000005466 | CID000005472 |
| CID000005478 | CID000005479 | CID000005486 | CID000005487 | CID000005496 |
| CID000005503 | CID000005504 | CID000005505 | CID000005508 | CID000005514 |
| CID000005515 | CID000005516 | CID000005523 | CID000005525 | CID000005526 |
| CID000005530 | CID000005533 | CID000005538 | CID000005544 | CID000005546 |
| CID000005556 | CID000005566 | CID000005572 | CID000005578 | CID000005582 |
| CID000005584 | CID000005591 | CID000005593 | CID000005625 | CID000005645 |
| CID000005647 | CID000005650 | CID000005651 | CID000005665 | CID000005672 |
| CID000005717 | CID000005718 | CID000005719 | CID000005721 | CID000005726 |
| CID000005731 | CID000005732 | CID000005734 | CID000005735 | CID000005746 |
| CID000005771 | CID000005775 | CID000005978 | CID000006049 | CID000006058 |
| CID000006476 | CID000006691 | CID000007029 | CID000008612 | CID000009034 |
| CID000009433 | CID000009904 | CID000010100 | CID000010631 | CID000012555 |
| CID000013342 | CID000014888 | CID000016850 | CID000018140 | CID000019090 |
| CID000020585 | CID000023897 | CID000025419 | CID000027400 | CID000027661 |
| CID000027991 | CID000028112 | CID000030623 | CID000031477 | CID000032800 |
| CID000034312 | CID000036339 | CID000036811 | CID000038904 | CID000039042 |
| CID000040159 | CID000040976 | CID000041317 | CID000041693 | CID000041744 |
| CID000041774 | CID000041781 | CID000042113 | CID000042615 | CID000044564 |
| CID000047725 | CID000050294 | CID000050614 | CID000051263 | CID000051634 |
| CID000054454 | CID000054547 | CID000054688 | CID000054786 | CID000056959 |
| CID000057469 | CID000057537 | CID000059708 | CID000059768 | CID000060184 |
| CID000060198 | CID000060612 | CID000060613 | CID000060714 | CID000060753 |
| CID000060754 | CID000060787 | CID000060795 | CID000060843 | CID000060852 |
| CID000060865 | CID000060871 | CID000060877 | CID000060953 | CID000062816 |
| CID000062819 | CID000062867 | CID000062924 | CID000062959 | CID000064147 |
| CID000065027 | CID000065999 | CID000068740 | CID000068844 | CID000071158 |
| CID000071273 | CID000071301 | CID000071329 | CID000071616 | CID000072054 |
| CID000072938 | CID000074989 | CID000077992 | CID000077993 | CID000077999 |
| CID000082146 | CID000083786 | CID000093860 | CID000096312 | CID000104741 |

|              |              |              |              |              |
|--------------|--------------|--------------|--------------|--------------|
| CID000104758 | CID000104865 | CID000110634 | CID000110635 | CID000115237 |
| CID000119182 | CID000119607 | CID000122316 | CID000123606 | CID000123620 |
| CID000123631 | CID000124087 | CID000125017 | CID000125889 | CID000130881 |
| CID000147912 | CID000148192 | CID000150311 | CID000150610 | CID000153941 |
| CID000158440 | CID000160051 | CID000163742 | CID000166548 | CID000170361 |
| CID000176168 | CID000176870 | CID000197712 | CID000213039 | CID000216239 |
| CID000216326 | CID000443871 | CID000444013 | CID000444033 | CID000450096 |
| CID000477468 | CID000657298 | CID000667490 | CID001349907 | CID002761171 |
| CID003002190 | CID003062316 | CID003081884 | CID003086672 | CID004183806 |
| CID004659568 | CID004659569 | CID005229711 | CID005281007 | CID005281104 |
| CID005282044 | CID005311181 | CID005311297 | CID005329102 | CID005353894 |
| CID005361912 | CID005362070 | CID005362420 | CID005381226 | CID005473385 |
| CID005481350 | CID005487301 | CID005493381 | CID005493444 | CID006323497 |
| CID006398525 | CID006398970 | CID006435110 | CID006436173 | CID006447131 |
| CID006918453 | CID009571074 | CID011947681 |              |              |

(2)  $S_2$ : 663 drug compounds having side effect "Headache"

|              |              |              |              |              |
|--------------|--------------|--------------|--------------|--------------|
| CID000000085 | CID000000158 | CID000000159 | CID000000191 | CID000000206 |
| CID000000214 | CID000000232 | CID000000298 | CID000000401 | CID000000444 |
| CID000000450 | CID000000453 | CID000000564 | CID000000596 | CID000000598 |
| CID000000681 | CID000000727 | CID000000738 | CID000000767 | CID000000772 |
| CID000000807 | CID000000815 | CID000000838 | CID000000853 | CID000000937 |
| CID000000942 | CID000000951 | CID000001003 | CID000001065 | CID000001125 |
| CID000001134 | CID000001148 | CID000001206 | CID000001546 | CID000001775 |
| CID000001935 | CID000001971 | CID000001972 | CID000001978 | CID000001986 |
| CID000002022 | CID000002082 | CID000002083 | CID000002092 | CID000002099 |
| CID000002118 | CID000002130 | CID000002142 | CID000002145 | CID000002153 |
| CID000002156 | CID000002160 | CID000002162 | CID000002170 | CID000002171 |
| CID000002177 | CID000002179 | CID000002182 | CID000002187 | CID000002215 |
| CID000002216 | CID000002232 | CID000002249 | CID000002250 | CID000002267 |
| CID000002269 | CID000002274 | CID000002284 | CID000002308 | CID000002311 |
| CID000002315 | CID000002349 | CID000002366 | CID000002369 | CID000002370 |
| CID000002375 | CID000002405 | CID000002435 | CID000002441 | CID000002443 |
| CID000002462 | CID000002471 | CID000002474 | CID000002476 | CID000002477 |
| CID000002478 | CID000002487 | CID000002512 | CID000002520 | CID000002524 |
| CID000002541 | CID000002550 | CID000002551 | CID000002559 | CID000002564 |
| CID000002575 | CID000002576 | CID000002578 | CID000002583 | CID000002585 |
| CID000002609 | CID000002610 | CID000002622 | CID000002631 | CID000002646 |
| CID000002650 | CID000002654 | CID000002656 | CID000002658 | CID000002662 |
| CID000002666 | CID000002675 | CID000002676 | CID000002678 | CID000002713 |
| CID000002719 | CID000002720 | CID000002727 | CID000002732 | CID000002749 |
| CID000002751 | CID000002756 | CID000002762 | CID000002764 | CID000002769 |
| CID000002771 | CID000002781 | CID000002786 | CID000002794 | CID000002800 |
| CID000002801 | CID000002802 | CID000002803 | CID000002806 | CID000002818 |

|              |              |              |              |              |
|--------------|--------------|--------------|--------------|--------------|
| CID000002891 | CID000002895 | CID000002907 | CID000002909 | CID000002913 |
| CID000002949 | CID000002951 | CID000002955 | CID000002958 | CID000002973 |
| CID000002978 | CID000002983 | CID000002995 | CID000003003 | CID000003007 |
| CID000003009 | CID000003015 | CID000003016 | CID000003019 | CID000003032 |
| CID000003042 | CID000003043 | CID000003059 | CID000003062 | CID000003066 |
| CID000003075 | CID000003080 | CID000003100 | CID000003105 | CID000003108 |
| CID000003114 | CID000003117 | CID000003125 | CID000003143 | CID000003148 |
| CID000003151 | CID000003152 | CID000003154 | CID000003156 | CID000003157 |
| CID000003158 | CID000003161 | CID000003203 | CID000003219 | CID000003222 |
| CID000003241 | CID000003251 | CID000003261 | CID000003278 | CID000003279 |
| CID000003285 | CID000003291 | CID000003292 | CID000003305 | CID000003308 |
| CID000003310 | CID000003324 | CID000003325 | CID000003333 | CID000003339 |
| CID000003340 | CID000003342 | CID000003345 | CID000003348 | CID000003350 |
| CID000003354 | CID000003355 | CID000003366 | CID000003367 | CID000003372 |
| CID000003373 | CID000003379 | CID000003381 | CID000003382 | CID000003385 |
| CID000003387 | CID000003393 | CID000003394 | CID000003403 | CID000003404 |
| CID000003406 | CID000003410 | CID000003414 | CID000003417 | CID000003419 |
| CID000003440 | CID000003446 | CID000003449 | CID000003454 | CID000003461 |
| CID000003463 | CID000003467 | CID000003475 | CID000003476 | CID000003478 |
| CID000003494 | CID000003510 | CID000003512 | CID000003519 | CID000003559 |
| CID000003637 | CID000003639 | CID000003640 | CID000003647 | CID000003648 |
| CID000003652 | CID000003657 | CID000003658 | CID000003661 | CID000003675 |
| CID000003676 | CID000003685 | CID000003696 | CID000003702 | CID000003706 |
| CID000003715 | CID000003724 | CID000003730 | CID000003734 | CID000003736 |
| CID000003737 | CID000003739 | CID000003741 | CID000003742 | CID000003746 |
| CID000003749 | CID000003750 | CID000003759 | CID000003779 | CID000003780 |
| CID000003784 | CID000003793 | CID000003823 | CID000003825 | CID000003826 |
| CID000003827 | CID000003869 | CID000003877 | CID000003878 | CID000003883 |
| CID000003899 | CID000003902 | CID000003911 | CID000003914 | CID000003915 |
| CID000003929 | CID000003937 | CID000003948 | CID000003954 | CID000003956 |
| CID000003957 | CID000003958 | CID000003961 | CID000003962 | CID000003964 |
| CID000004011 | CID000004036 | CID000004044 | CID000004046 | CID000004054 |
| CID000004057 | CID000004058 | CID000004062 | CID000004064 | CID000004075 |
| CID000004086 | CID000004091 | CID000004095 | CID000004107 | CID000004112 |
| CID000004114 | CID000004121 | CID000004138 | CID000004140 | CID000004158 |
| CID000004159 | CID000004160 | CID000004168 | CID000004170 | CID000004171 |
| CID000004173 | CID000004174 | CID000004178 | CID000004189 | CID000004192 |
| CID000004195 | CID000004196 | CID000004197 | CID000004200 | CID000004201 |
| CID000004205 | CID000004212 | CID000004236 | CID000004253 | CID000004259 |
| CID000004264 | CID000004409 | CID000004411 | CID000004419 | CID000004421 |
| CID000004428 | CID000004436 | CID000004440 | CID000004449 | CID000004451 |
| CID000004463 | CID000004473 | CID000004485 | CID000004493 | CID000004497 |
| CID000004506 | CID000004509 | CID000004510 | CID000004513 | CID000004536 |
| CID000004539 | CID000004542 | CID000004543 | CID000004547 | CID000004583 |

|              |              |              |              |              |
|--------------|--------------|--------------|--------------|--------------|
| CID000004585 | CID000004594 | CID000004595 | CID000004599 | CID000004601 |
| CID000004609 | CID000004614 | CID000004616 | CID000004634 | CID000004635 |
| CID000004666 | CID000004679 | CID000004723 | CID000004724 | CID000004725 |
| CID000004736 | CID000004737 | CID000004739 | CID000004740 | CID000004745 |
| CID000004748 | CID000004771 | CID000004775 | CID000004819 | CID000004828 |
| CID000004829 | CID000004834 | CID000004845 | CID000004856 | CID000004865 |
| CID000004870 | CID000004885 | CID000004889 | CID000004891 | CID000004893 |
| CID000004894 | CID000004900 | CID000004911 | CID000004914 | CID000004915 |
| CID000004917 | CID000004920 | CID000004932 | CID000004934 | CID000004943 |
| CID000004946 | CID000004976 | CID000004991 | CID000005002 | CID000005005 |
| CID000005029 | CID000005035 | CID000005038 | CID000005039 | CID000005040 |
| CID000005052 | CID000005064 | CID000005070 | CID000005071 | CID000005073 |
| CID000005076 | CID000005077 | CID000005078 | CID000005090 | CID000005095 |
| CID000005152 | CID000005155 | CID000005193 | CID000005195 | CID000005206 |
| CID000005210 | CID000005212 | CID000005215 | CID000005245 | CID000005253 |
| CID000005267 | CID000005291 | CID000005344 | CID000005352 | CID000005358 |
| CID000005372 | CID000005376 | CID000005379 | CID000005391 | CID000005394 |
| CID000005396 | CID000005401 | CID000005402 | CID000005403 | CID000005404 |
| CID000005408 | CID000005412 | CID000005419 | CID000005426 | CID000005430 |
| CID000005452 | CID000005453 | CID000005466 | CID000005472 | CID000005478 |
| CID000005479 | CID000005486 | CID000005496 | CID000005503 | CID000005505 |
| CID000005508 | CID000005512 | CID000005515 | CID000005523 | CID000005525 |
| CID000005530 | CID000005533 | CID000005538 | CID000005544 | CID000005546 |
| CID000005556 | CID000005566 | CID000005572 | CID000005584 | CID000005593 |
| CID000005596 | CID000005625 | CID000005636 | CID000005645 | CID000005647 |
| CID000005650 | CID000005656 | CID000005665 | CID000005672 | CID000005717 |
| CID000005718 | CID000005719 | CID000005726 | CID000005731 | CID000005732 |
| CID000005734 | CID000005735 | CID000005746 | CID000005775 | CID000005978 |
| CID000006049 | CID000006058 | CID000006476 | CID000006691 | CID000007029 |
| CID000008612 | CID000009034 | CID000009433 | CID000010100 | CID000010631 |
| CID000012536 | CID000012555 | CID000012620 | CID000013342 | CID000014888 |
| CID000016362 | CID000016850 | CID000018140 | CID000019090 | CID000020585 |
| CID000027400 | CID000027661 | CID000027991 | CID000028112 | CID000030623 |
| CID000031378 | CID000031477 | CID000032797 | CID000032800 | CID000034312 |
| CID000036811 | CID000039042 | CID000039507 | CID000039860 | CID000040159 |
| CID000040976 | CID000041317 | CID000041693 | CID000041744 | CID000041781 |
| CID000042113 | CID000042615 | CID000044564 | CID000047725 | CID000050294 |
| CID000051263 | CID000051634 | CID000054454 | CID000054547 | CID000054688 |
| CID000054786 | CID000056959 | CID000057469 | CID000057537 | CID000059708 |
| CID000059768 | CID000060184 | CID000060198 | CID000060612 | CID000060613 |
| CID000060714 | CID000060753 | CID000060754 | CID000060787 | CID000060795 |
| CID000060852 | CID000060865 | CID000060871 | CID000060877 | CID000060953 |
| CID000062816 | CID000062819 | CID000062867 | CID000062924 | CID000062959 |
| CID000064147 | CID000065027 | CID000065999 | CID000068740 | CID000068844 |

|              |              |              |              |              |
|--------------|--------------|--------------|--------------|--------------|
| CID000071158 | CID000071273 | CID000071301 | CID000071329 | CID000071616 |
| CID000072054 | CID000072938 | CID000074989 | CID000077992 | CID000077993 |
| CID000077999 | CID000082146 | CID000083786 | CID000093860 | CID000096312 |
| CID000104741 | CID000104758 | CID000104865 | CID000110634 | CID000110635 |
| CID000115237 | CID000119182 | CID000119607 | CID000122316 | CID000123606 |
| CID000123620 | CID000124087 | CID000125017 | CID000125889 | CID000130881 |
| CID000147912 | CID000148192 | CID000148211 | CID000150310 | CID000150311 |
| CID000150610 | CID000151165 | CID000153941 | CID000158440 | CID000160051 |
| CID000163742 | CID000166548 | CID000170361 | CID000176168 | CID000176870 |
| CID000197712 | CID000213039 | CID000216239 | CID000216326 | CID000222786 |
| CID000444013 | CID000444033 | CID000450096 | CID000477468 | CID000657298 |
| CID001349907 | CID002761171 | CID003002190 | CID003062316 | CID003081884 |
| CID003086672 | CID004183806 | CID004659569 | CID005229711 | CID005281007 |
| CID005281104 | CID005282044 | CID005282226 | CID005311027 | CID005311181 |
| CID005329102 | CID005353894 | CID005353980 | CID005361912 | CID005362070 |
| CID005362420 | CID005381226 | CID005481350 | CID005487301 | CID005493381 |
| CID005493444 | CID006323497 | CID006398525 | CID006398970 | CID006436173 |
| CID006447131 | CID009571074 | CID011947681 |              |              |

(3)  $S_3$ : 652 drug compounds having side effect "Vomiting"

|              |              |              |              |              |
|--------------|--------------|--------------|--------------|--------------|
| CID000000085 | CID000000143 | CID000000158 | CID000000159 | CID000000191 |
| CID000000206 | CID000000232 | CID000000271 | CID000000298 | CID000000444 |
| CID000000450 | CID000000453 | CID000000564 | CID000000581 | CID000000596 |
| CID000000598 | CID000000681 | CID000000738 | CID000000750 | CID000000767 |
| CID000000772 | CID000000807 | CID000000815 | CID000000853 | CID000000937 |
| CID000000951 | CID000001003 | CID000001046 | CID000001065 | CID000001125 |
| CID000001134 | CID000001148 | CID000001546 | CID000001690 | CID000001775 |
| CID000001935 | CID000001971 | CID000001972 | CID000001978 | CID000001986 |
| CID000002022 | CID000002082 | CID000002083 | CID000002118 | CID000002123 |
| CID000002130 | CID000002131 | CID000002140 | CID000002141 | CID000002142 |
| CID000002145 | CID000002148 | CID000002153 | CID000002156 | CID000002160 |
| CID000002162 | CID000002170 | CID000002171 | CID000002173 | CID000002177 |
| CID000002179 | CID000002182 | CID000002187 | CID000002215 | CID000002216 |
| CID000002232 | CID000002244 | CID000002250 | CID000002265 | CID000002267 |
| CID000002269 | CID000002274 | CID000002284 | CID000002311 | CID000002315 |
| CID000002344 | CID000002349 | CID000002369 | CID000002375 | CID000002405 |
| CID000002431 | CID000002441 | CID000002443 | CID000002462 | CID000002471 |
| CID000002474 | CID000002476 | CID000002477 | CID000002478 | CID000002487 |
| CID000002512 | CID000002520 | CID000002524 | CID000002541 | CID000002550 |
| CID000002554 | CID000002559 | CID000002564 | CID000002575 | CID000002576 |
| CID000002578 | CID000002585 | CID000002609 | CID000002610 | CID000002617 |
| CID000002622 | CID000002629 | CID000002631 | CID000002637 | CID000002646 |
| CID000002650 | CID000002654 | CID000002655 | CID000002656 | CID000002658 |
| CID000002662 | CID000002666 | CID000002673 | CID000002675 | CID000002676 |

|              |              |              |              |              |
|--------------|--------------|--------------|--------------|--------------|
| CID000002678 | CID000002708 | CID000002719 | CID000002720 | CID000002725 |
| CID000002727 | CID000002732 | CID000002751 | CID000002762 | CID000002764 |
| CID000002769 | CID000002771 | CID000002781 | CID000002786 | CID000002794 |
| CID000002800 | CID000002801 | CID000002802 | CID000002803 | CID000002806 |
| CID000002812 | CID000002818 | CID000002891 | CID000002895 | CID000002907 |
| CID000002909 | CID000002913 | CID000002949 | CID000002951 | CID000002955 |
| CID000002958 | CID000002983 | CID000002995 | CID000003007 | CID000003015 |
| CID000003016 | CID000003019 | CID000003032 | CID000003040 | CID000003042 |
| CID000003043 | CID000003059 | CID000003062 | CID000003066 | CID000003075 |
| CID000003080 | CID000003100 | CID000003108 | CID000003114 | CID000003121 |
| CID000003125 | CID000003143 | CID000003152 | CID000003154 | CID000003157 |
| CID000003158 | CID000003203 | CID000003222 | CID000003226 | CID000003251 |
| CID000003255 | CID000003261 | CID000003278 | CID000003279 | CID000003285 |
| CID000003291 | CID000003292 | CID000003305 | CID000003308 | CID000003310 |
| CID000003324 | CID000003325 | CID000003333 | CID000003339 | CID000003340 |
| CID000003342 | CID000003345 | CID000003348 | CID000003354 | CID000003355 |
| CID000003365 | CID000003366 | CID000003367 | CID000003372 | CID000003373 |
| CID000003379 | CID000003381 | CID000003385 | CID000003393 | CID000003394 |
| CID000003397 | CID000003403 | CID000003404 | CID000003406 | CID000003410 |
| CID000003414 | CID000003417 | CID000003419 | CID000003440 | CID000003446 |
| CID000003449 | CID000003454 | CID000003461 | CID000003463 | CID000003467 |
| CID000003475 | CID000003476 | CID000003478 | CID000003488 | CID000003494 |
| CID000003512 | CID000003518 | CID000003559 | CID000003562 | CID000003637 |
| CID000003639 | CID000003647 | CID000003648 | CID000003652 | CID000003657 |
| CID000003661 | CID000003672 | CID000003675 | CID000003676 | CID000003685 |
| CID000003690 | CID000003696 | CID000003698 | CID000003702 | CID000003706 |
| CID000003715 | CID000003724 | CID000003730 | CID000003734 | CID000003736 |
| CID000003737 | CID000003739 | CID000003741 | CID000003742 | CID000003746 |
| CID000003749 | CID000003750 | CID000003763 | CID000003767 | CID000003783 |
| CID000003784 | CID000003793 | CID000003821 | CID000003823 | CID000003825 |
| CID000003826 | CID000003827 | CID000003869 | CID000003877 | CID000003878 |
| CID000003883 | CID000003899 | CID000003902 | CID000003911 | CID000003928 |
| CID000003929 | CID000003937 | CID000003948 | CID000003950 | CID000003954 |
| CID000003956 | CID000003957 | CID000003958 | CID000003961 | CID000003962 |
| CID000003964 | CID000004011 | CID000004032 | CID000004033 | CID000004036 |
| CID000004044 | CID000004046 | CID000004053 | CID000004054 | CID000004057 |
| CID000004058 | CID000004060 | CID000004062 | CID000004064 | CID000004075 |
| CID000004078 | CID000004086 | CID000004091 | CID000004095 | CID000004100 |
| CID000004101 | CID000004107 | CID000004112 | CID000004121 | CID000004138 |
| CID000004140 | CID000004158 | CID000004159 | CID000004163 | CID000004170 |
| CID000004171 | CID000004173 | CID000004174 | CID000004178 | CID000004192 |
| CID000004196 | CID000004200 | CID000004201 | CID000004205 | CID000004211 |
| CID000004212 | CID000004236 | CID000004253 | CID000004259 | CID000004409 |
| CID000004411 | CID000004419 | CID000004421 | CID000004425 | CID000004428 |



|              |              |              |              |              |
|--------------|--------------|--------------|--------------|--------------|
| CID000004440 | CID000004449 | CID000004451 | CID000004463 | CID000004473 |
| CID000004485 | CID000004493 | CID000004497 | CID000004506 | CID000004509 |
| CID000004510 | CID000004513 | CID000004539 | CID000004542 | CID000004543 |
| CID000004547 | CID000004583 | CID000004585 | CID000004599 | CID000004601 |
| CID000004603 | CID000004607 | CID000004609 | CID000004614 | CID000004635 |
| CID000004638 | CID000004645 | CID000004666 | CID000004679 | CID000004691 |
| CID000004727 | CID000004730 | CID000004736 | CID000004737 | CID000004739 |
| CID000004740 | CID000004745 | CID000004775 | CID000004819 | CID000004828 |
| CID000004834 | CID000004845 | CID000004856 | CID000004865 | CID000004870 |
| CID000004873 | CID000004885 | CID000004889 | CID000004891 | CID000004893 |
| CID000004908 | CID000004909 | CID000004911 | CID000004913 | CID000004914 |
| CID000004915 | CID000004919 | CID000004920 | CID000004932 | CID000004934 |
| CID000004943 | CID000004946 | CID000004976 | CID000004991 | CID000004993 |
| CID000005002 | CID000005005 | CID000005029 | CID000005035 | CID000005038 |
| CID000005039 | CID000005040 | CID000005052 | CID000005064 | CID000005070 |
| CID000005071 | CID000005073 | CID000005076 | CID000005077 | CID000005078 |
| CID000005090 | CID000005095 | CID000005152 | CID000005155 | CID000005193 |
| CID000005195 | CID000005203 | CID000005206 | CID000005210 | CID000005212 |
| CID000005215 | CID000005245 | CID000005253 | CID000005267 | CID000005291 |
| CID000005297 | CID000005300 | CID000005344 | CID000005352 | CID000005358 |
| CID000005372 | CID000005376 | CID000005379 | CID000005391 | CID000005394 |
| CID000005396 | CID000005401 | CID000005402 | CID000005403 | CID000005408 |
| CID000005412 | CID000005426 | CID000005430 | CID000005452 | CID000005453 |
| CID000005454 | CID000005466 | CID000005472 | CID000005478 | CID000005479 |
| CID000005487 | CID000005496 | CID000005504 | CID000005508 | CID000005514 |
| CID000005515 | CID000005516 | CID000005523 | CID000005525 | CID000005526 |
| CID000005533 | CID000005538 | CID000005544 | CID000005546 | CID000005556 |
| CID000005566 | CID000005572 | CID000005578 | CID000005582 | CID000005584 |
| CID000005591 | CID000005593 | CID000005596 | CID000005625 | CID000005645 |
| CID000005647 | CID000005650 | CID000005656 | CID000005665 | CID000005672 |
| CID000005717 | CID000005718 | CID000005721 | CID000005726 | CID000005731 |
| CID000005732 | CID000005734 | CID000005735 | CID000005746 | CID000005771 |
| CID000005775 | CID000005978 | CID000006049 | CID000006058 | CID000006476 |
| CID000006691 | CID000007029 | CID000008612 | CID000009034 | CID000009433 |
| CID000009904 | CID000010100 | CID000010631 | CID000012555 | CID000013342 |
| CID000014888 | CID000016850 | CID000018140 | CID000019090 | CID000020585 |
| CID000025419 | CID000027661 | CID000027991 | CID000028112 | CID000030623 |
| CID000032800 | CID000034312 | CID000036339 | CID000038904 | CID000040159 |
| CID000040976 | CID000041693 | CID000041744 | CID000041774 | CID000041781 |
| CID000042113 | CID000042615 | CID000047725 | CID000050294 | CID000050614 |
| CID000051263 | CID000051634 | CID000054454 | CID000054547 | CID000054688 |
| CID000054786 | CID000056959 | CID000057469 | CID000057537 | CID000059708 |
| CID000059768 | CID000060184 | CID000060198 | CID000060612 | CID000060613 |
| CID000060714 | CID000060754 | CID000060787 | CID000060795 | CID000060843 |

|              |              |              |              |              |
|--------------|--------------|--------------|--------------|--------------|
| CID000060852 | CID000060871 | CID000060877 | CID000060953 | CID000062816 |
| CID000062819 | CID000062867 | CID000062924 | CID000062959 | CID000064147 |
| CID000065027 | CID000065999 | CID000068740 | CID000071158 | CID000071273 |
| CID000071301 | CID000071616 | CID000072054 | CID000072938 | CID000074989 |
| CID000077992 | CID000077993 | CID000077999 | CID000082146 | CID000083786 |
| CID000093860 | CID000096312 | CID000104741 | CID000104758 | CID000104865 |
| CID000110634 | CID000110635 | CID000115237 | CID000119182 | CID000119607 |
| CID000122316 | CID000123606 | CID000123620 | CID000123631 | CID000124087 |
| CID000125017 | CID000125889 | CID000130881 | CID000147912 | CID000148192 |
| CID000150610 | CID000153941 | CID000158440 | CID000163742 | CID000166548 |
| CID000170361 | CID000176168 | CID000176870 | CID000213039 | CID000216239 |
| CID000216326 | CID000444013 | CID000450096 | CID000477468 | CID000657298 |
| CID000667490 | CID001349907 | CID002761171 | CID003002190 | CID003062316 |
| CID003081884 | CID003086672 | CID004183806 | CID004659568 | CID004659569 |
| CID005229711 | CID005281007 | CID005281104 | CID005282044 | CID005311181 |
| CID005311297 | CID005329102 | CID005361912 | CID005362070 | CID005381226 |
| CID005473385 | CID005481350 | CID005487301 | CID005493381 | CID006323497 |
| CID006398525 | CID006398970 | CID006435110 | CID006436173 | CID006447131 |
| CID006918453 | CID009571074 |              |              |              |

(4)  $S_4$  : 604 drug compounds having side effect "Rash"

|              |              |              |              |              |
|--------------|--------------|--------------|--------------|--------------|
| CID000000085 | CID000000137 | CID000000143 | CID000000158 | CID000000159 |
| CID000000214 | CID000000232 | CID000000401 | CID000000444 | CID000000450 |
| CID000000564 | CID000000581 | CID000000596 | CID000000598 | CID000000612 |
| CID000000738 | CID000000767 | CID000000772 | CID000000807 | CID000000815 |
| CID000000853 | CID000000937 | CID000000942 | CID000001003 | CID000001065 |
| CID000001125 | CID000001134 | CID000001546 | CID000001775 | CID000001935 |
| CID000001971 | CID000001972 | CID000001978 | CID000002022 | CID000002082 |
| CID000002083 | CID000002092 | CID000002099 | CID000002118 | CID000002123 |
| CID000002130 | CID000002140 | CID000002142 | CID000002145 | CID000002156 |
| CID000002160 | CID000002162 | CID000002170 | CID000002177 | CID000002179 |
| CID000002182 | CID000002187 | CID000002216 | CID000002232 | CID000002249 |
| CID000002250 | CID000002266 | CID000002267 | CID000002269 | CID000002274 |
| CID000002284 | CID000002308 | CID000002311 | CID000002315 | CID000002344 |
| CID000002349 | CID000002369 | CID000002375 | CID000002405 | CID000002431 |
| CID000002435 | CID000002441 | CID000002443 | CID000002462 | CID000002471 |
| CID000002476 | CID000002477 | CID000002478 | CID000002487 | CID000002512 |
| CID000002519 | CID000002520 | CID000002522 | CID000002524 | CID000002541 |
| CID000002550 | CID000002554 | CID000002559 | CID000002575 | CID000002576 |
| CID000002578 | CID000002583 | CID000002585 | CID000002609 | CID000002610 |
| CID000002617 | CID000002622 | CID000002631 | CID000002637 | CID000002646 |
| CID000002650 | CID000002654 | CID000002655 | CID000002656 | CID000002658 |
| CID000002662 | CID000002666 | CID000002673 | CID000002676 | CID000002678 |
| CID000002708 | CID000002720 | CID000002732 | CID000002749 | CID000002751 |

|              |              |              |              |              |
|--------------|--------------|--------------|--------------|--------------|
| CID000002756 | CID000002762 | CID000002764 | CID000002769 | CID000002771 |
| CID000002786 | CID000002794 | CID000002800 | CID000002801 | CID000002802 |
| CID000002803 | CID000002806 | CID000002812 | CID000002818 | CID000002891 |
| CID000002895 | CID000002905 | CID000002907 | CID000002909 | CID000002913 |
| CID000002951 | CID000002958 | CID000002973 | CID000002978 | CID000002995 |
| CID000003003 | CID000003007 | CID000003009 | CID000003015 | CID000003016 |
| CID000003019 | CID000003032 | CID000003040 | CID000003042 | CID000003043 |
| CID000003059 | CID000003062 | CID000003066 | CID000003075 | CID000003108 |
| CID000003114 | CID000003121 | CID000003143 | CID000003148 | CID000003151 |
| CID000003152 | CID000003154 | CID000003157 | CID000003158 | CID000003161 |
| CID000003198 | CID000003203 | CID000003222 | CID000003261 | CID000003278 |
| CID000003279 | CID000003285 | CID000003292 | CID000003305 | CID000003308 |
| CID000003310 | CID000003325 | CID000003333 | CID000003339 | CID000003342 |
| CID000003345 | CID000003348 | CID000003350 | CID000003355 | CID000003365 |
| CID000003366 | CID000003367 | CID000003373 | CID000003379 | CID000003381 |
| CID000003385 | CID000003386 | CID000003393 | CID000003394 | CID000003397 |
| CID000003403 | CID000003405 | CID000003406 | CID000003410 | CID000003414 |
| CID000003417 | CID000003419 | CID000003440 | CID000003446 | CID000003449 |
| CID000003454 | CID000003461 | CID000003463 | CID000003467 | CID000003475 |
| CID000003478 | CID000003510 | CID000003519 | CID000003636 | CID000003637 |
| CID000003639 | CID000003640 | CID000003647 | CID000003648 | CID000003657 |
| CID000003658 | CID000003661 | CID000003672 | CID000003675 | CID000003685 |
| CID000003696 | CID000003702 | CID000003706 | CID000003715 | CID000003724 |
| CID000003734 | CID000003736 | CID000003737 | CID000003741 | CID000003742 |
| CID000003746 | CID000003749 | CID000003750 | CID000003783 | CID000003784 |
| CID000003793 | CID000003821 | CID000003823 | CID000003825 | CID000003826 |
| CID000003827 | CID000003869 | CID000003877 | CID000003883 | CID000003890 |
| CID000003899 | CID000003902 | CID000003911 | CID000003914 | CID000003915 |
| CID000003929 | CID000003937 | CID000003948 | CID000003954 | CID000003956 |
| CID000003957 | CID000003958 | CID000003961 | CID000003962 | CID000003964 |
| CID000003998 | CID000004011 | CID000004030 | CID000004033 | CID000004036 |
| CID000004046 | CID000004054 | CID000004064 | CID000004075 | CID000004078 |
| CID000004091 | CID000004101 | CID000004107 | CID000004112 | CID000004114 |
| CID000004121 | CID000004138 | CID000004140 | CID000004158 | CID000004168 |
| CID000004170 | CID000004171 | CID000004173 | CID000004174 | CID000004178 |
| CID000004189 | CID000004192 | CID000004195 | CID000004196 | CID000004197 |
| CID000004200 | CID000004201 | CID000004205 | CID000004212 | CID000004236 |
| CID000004253 | CID000004259 | CID000004264 | CID000004409 | CID000004411 |
| CID000004419 | CID000004421 | CID000004428 | CID000004449 | CID000004451 |
| CID000004473 | CID000004485 | CID000004493 | CID000004497 | CID000004510 |
| CID000004513 | CID000004536 | CID000004539 | CID000004542 | CID000004543 |
| CID000004583 | CID000004585 | CID000004594 | CID000004595 | CID000004599 |
| CID000004603 | CID000004607 | CID000004609 | CID000004614 | CID000004623 |
| CID000004635 | CID000004666 | CID000004675 | CID000004679 | CID000004691 |

|              |              |              |              |              |
|--------------|--------------|--------------|--------------|--------------|
| CID000004723 | CID000004724 | CID000004725 | CID000004739 | CID000004740 |
| CID000004745 | CID000004775 | CID000004819 | CID000004828 | CID000004834 |
| CID000004845 | CID000004856 | CID000004865 | CID000004870 | CID000004873 |
| CID000004885 | CID000004889 | CID000004893 | CID000004894 | CID000004913 |
| CID000004915 | CID000004919 | CID000004920 | CID000004927 | CID000004932 |
| CID000004943 | CID000004946 | CID000004976 | CID000004991 | CID000005002 |
| CID000005005 | CID000005029 | CID000005035 | CID000005038 | CID000005039 |
| CID000005040 | CID000005052 | CID000005064 | CID000005070 | CID000005071 |
| CID000005073 | CID000005076 | CID000005077 | CID000005078 | CID000005090 |
| CID000005095 | CID000005152 | CID000005155 | CID000005195 | CID000005203 |
| CID000005206 | CID000005210 | CID000005212 | CID000005245 | CID000005253 |
| CID000005291 | CID000005297 | CID000005314 | CID000005342 | CID000005344 |
| CID000005352 | CID000005358 | CID000005372 | CID000005376 | CID000005379 |
| CID000005381 | CID000005394 | CID000005396 | CID000005401 | CID000005402 |
| CID000005408 | CID000005412 | CID000005426 | CID000005453 | CID000005454 |
| CID000005466 | CID000005472 | CID000005478 | CID000005479 | CID000005487 |
| CID000005496 | CID000005504 | CID000005514 | CID000005515 | CID000005523 |
| CID000005525 | CID000005530 | CID000005533 | CID000005538 | CID000005544 |
| CID000005546 | CID000005566 | CID000005578 | CID000005582 | CID000005584 |
| CID000005596 | CID000005625 | CID000005645 | CID000005647 | CID000005650 |
| CID000005651 | CID000005656 | CID000005665 | CID000005672 | CID000005717 |
| CID000005718 | CID000005719 | CID000005721 | CID000005726 | CID000005731 |
| CID000005732 | CID000005734 | CID000005735 | CID000005978 | CID000006049 |
| CID000006058 | CID000006476 | CID000006691 | CID000007029 | CID000010631 |
| CID000012536 | CID000012620 | CID000014888 | CID000016362 | CID000018140 |
| CID000019090 | CID000020585 | CID000023897 | CID000025419 | CID000027661 |
| CID000027686 | CID000027991 | CID000028112 | CID000031378 | CID000031477 |
| CID000032800 | CID000034312 | CID000038904 | CID000039042 | CID000039860 |
| CID000040159 | CID000040976 | CID000041317 | CID000041693 | CID000041774 |
| CID000041781 | CID000042615 | CID000044564 | CID000047319 | CID000047320 |
| CID000047641 | CID000047725 | CID000048175 | CID000050294 | CID000050614 |
| CID000051577 | CID000052421 | CID000054454 | CID000054547 | CID000054688 |
| CID000054786 | CID000057469 | CID000057537 | CID000059708 | CID000060164 |
| CID000060184 | CID000060198 | CID000060613 | CID000060714 | CID000060754 |
| CID000060787 | CID000060795 | CID000060843 | CID000060852 | CID000060871 |
| CID000060877 | CID000060953 | CID000062816 | CID000062819 | CID000062867 |
| CID000062924 | CID000062959 | CID000065027 | CID000065999 | CID000068740 |
| CID000071158 | CID000071273 | CID000071301 | CID000071329 | CID000071616 |
| CID000072054 | CID000072938 | CID000074989 | CID000077992 | CID000077993 |
| CID000077999 | CID000082146 | CID000083786 | CID000093860 | CID000104741 |
| CID000104758 | CID000104865 | CID000110634 | CID000110635 | CID000119607 |
| CID000122316 | CID000123606 | CID000123631 | CID000124087 | CID000125017 |
| CID000125889 | CID000130881 | CID000147912 | CID000148192 | CID000148211 |
| CID000150310 | CID000150311 | CID000150610 | CID000151165 | CID000152945 |

|              |              |              |              |              |
|--------------|--------------|--------------|--------------|--------------|
| CID000153941 | CID000158440 | CID000163742 | CID000166548 | CID000170361 |
| CID000176870 | CID000197712 | CID000213039 | CID000216239 | CID000216326 |
| CID000443871 | CID000444013 | CID000444033 | CID000450096 | CID000477468 |
| CID000657298 | CID001349907 | CID002761171 | CID003002190 | CID003062316 |
| CID003081884 | CID004183806 | CID004479097 | CID004659568 | CID004659569 |
| CID005229711 | CID005281104 | CID005282044 | CID005311027 | CID005311297 |
| CID005329102 | CID005353980 | CID005361912 | CID005362420 | CID005381226 |
| CID005481350 | CID005487301 | CID005493381 | CID005493444 | CID006323497 |
| CID006398525 | CID006398970 | CID006435110 | CID006436173 | CID006447131 |
| CID006918453 | CID009571074 | CID011947681 | CID011954225 |              |

(5)  $S_5$ : 588 drug compounds having side effect “Dizziness”

|              |              |              |              |              |
|--------------|--------------|--------------|--------------|--------------|
| CID000000085 | CID000000158 | CID000000159 | CID000000191 | CID000000214 |
| CID000000444 | CID000000450 | CID000000453 | CID000000564 | CID000000596 |
| CID000000598 | CID000000727 | CID000000738 | CID000000767 | CID000000807 |
| CID000000838 | CID000000937 | CID000000942 | CID000001003 | CID000001065 |
| CID000001125 | CID000001134 | CID000001148 | CID000001206 | CID000001546 |
| CID000001690 | CID000001775 | CID000001935 | CID000001971 | CID000001972 |
| CID000001978 | CID000001986 | CID000002021 | CID000002022 | CID000002082 |
| CID000002083 | CID000002092 | CID000002123 | CID000002130 | CID000002140 |
| CID000002141 | CID000002145 | CID000002156 | CID000002160 | CID000002162 |
| CID000002170 | CID000002171 | CID000002179 | CID000002182 | CID000002187 |
| CID000002215 | CID000002216 | CID000002249 | CID000002250 | CID000002267 |
| CID000002269 | CID000002274 | CID000002284 | CID000002311 | CID000002315 |
| CID000002349 | CID000002369 | CID000002375 | CID000002405 | CID000002431 |
| CID000002435 | CID000002441 | CID000002443 | CID000002462 | CID000002471 |
| CID000002474 | CID000002476 | CID000002478 | CID000002487 | CID000002512 |
| CID000002520 | CID000002541 | CID000002550 | CID000002554 | CID000002564 |
| CID000002576 | CID000002578 | CID000002583 | CID000002585 | CID000002609 |
| CID000002610 | CID000002622 | CID000002646 | CID000002650 | CID000002654 |
| CID000002656 | CID000002658 | CID000002662 | CID000002666 | CID000002673 |
| CID000002675 | CID000002676 | CID000002678 | CID000002720 | CID000002725 |
| CID000002726 | CID000002727 | CID000002732 | CID000002733 | CID000002751 |
| CID000002756 | CID000002762 | CID000002764 | CID000002769 | CID000002771 |
| CID000002781 | CID000002786 | CID000002794 | CID000002800 | CID000002801 |
| CID000002803 | CID000002806 | CID000002818 | CID000002891 | CID000002895 |
| CID000002907 | CID000002909 | CID000002913 | CID000002949 | CID000002951 |
| CID000002958 | CID000002973 | CID000002978 | CID000002983 | CID000002995 |
| CID000003007 | CID000003009 | CID000003015 | CID000003016 | CID000003019 |
| CID000003032 | CID000003042 | CID000003059 | CID000003062 | CID000003066 |
| CID000003075 | CID000003100 | CID000003108 | CID000003114 | CID000003121 |
| CID000003143 | CID000003148 | CID000003151 | CID000003152 | CID000003154 |
| CID000003156 | CID000003157 | CID000003158 | CID000003168 | CID000003203 |
| CID000003222 | CID000003255 | CID000003261 | CID000003279 | CID000003285 |

|              |              |              |              |              |
|--------------|--------------|--------------|--------------|--------------|
| CID000003291 | CID000003292 | CID000003308 | CID000003310 | CID000003324 |
| CID000003325 | CID000003333 | CID000003339 | CID000003340 | CID000003342 |
| CID000003345 | CID000003348 | CID000003350 | CID000003355 | CID000003365 |
| CID000003373 | CID000003379 | CID000003381 | CID000003393 | CID000003394 |
| CID000003403 | CID000003404 | CID000003406 | CID000003410 | CID000003414 |
| CID000003417 | CID000003419 | CID000003440 | CID000003446 | CID000003449 |
| CID000003454 | CID000003463 | CID000003467 | CID000003475 | CID000003476 |
| CID000003478 | CID000003494 | CID000003510 | CID000003512 | CID000003518 |
| CID000003519 | CID000003636 | CID000003637 | CID000003639 | CID000003647 |
| CID000003648 | CID000003652 | CID000003657 | CID000003661 | CID000003672 |
| CID000003675 | CID000003676 | CID000003690 | CID000003696 | CID000003702 |
| CID000003706 | CID000003715 | CID000003724 | CID000003734 | CID000003736 |
| CID000003739 | CID000003746 | CID000003749 | CID000003750 | CID000003759 |
| CID000003779 | CID000003783 | CID000003784 | CID000003793 | CID000003823 |
| CID000003825 | CID000003826 | CID000003827 | CID000003869 | CID000003877 |
| CID000003883 | CID000003899 | CID000003902 | CID000003911 | CID000003914 |
| CID000003929 | CID000003937 | CID000003948 | CID000003954 | CID000003956 |
| CID000003957 | CID000003958 | CID000003961 | CID000003962 | CID000003964 |
| CID000004011 | CID000004032 | CID000004036 | CID000004044 | CID000004046 |
| CID000004054 | CID000004057 | CID000004058 | CID000004060 | CID000004062 |
| CID000004064 | CID000004075 | CID000004078 | CID000004086 | CID000004091 |
| CID000004095 | CID000004107 | CID000004112 | CID000004114 | CID000004121 |
| CID000004138 | CID000004140 | CID000004158 | CID000004163 | CID000004168 |
| CID000004170 | CID000004171 | CID000004173 | CID000004174 | CID000004178 |
| CID000004192 | CID000004195 | CID000004196 | CID000004200 | CID000004201 |
| CID000004211 | CID000004236 | CID000004253 | CID000004259 | CID000004264 |
| CID000004409 | CID000004411 | CID000004419 | CID000004421 | CID000004428 |
| CID000004436 | CID000004440 | CID000004449 | CID000004451 | CID000004473 |
| CID000004485 | CID000004493 | CID000004497 | CID000004506 | CID000004509 |
| CID000004510 | CID000004513 | CID000004536 | CID000004539 | CID000004542 |
| CID000004543 | CID000004583 | CID000004585 | CID000004594 | CID000004595 |
| CID000004599 | CID000004601 | CID000004603 | CID000004609 | CID000004614 |
| CID000004616 | CID000004635 | CID000004666 | CID000004679 | CID000004723 |
| CID000004724 | CID000004736 | CID000004737 | CID000004739 | CID000004740 |
| CID000004745 | CID000004748 | CID000004771 | CID000004812 | CID000004819 |
| CID000004828 | CID000004834 | CID000004845 | CID000004856 | CID000004865 |
| CID000004870 | CID000004885 | CID000004889 | CID000004891 | CID000004893 |
| CID000004911 | CID000004913 | CID000004914 | CID000004915 | CID000004917 |
| CID000004920 | CID000004927 | CID000004932 | CID000004934 | CID000004943 |
| CID000004946 | CID000004976 | CID000005002 | CID000005005 | CID000005029 |
| CID000005038 | CID000005039 | CID000005040 | CID000005052 | CID000005064 |
| CID000005070 | CID000005071 | CID000005073 | CID000005076 | CID000005077 |
| CID000005078 | CID000005090 | CID000005095 | CID000005152 | CID000005155 |
| CID000005193 | CID000005195 | CID000005206 | CID000005210 | CID000005212 |

|              |              |              |              |              |
|--------------|--------------|--------------|--------------|--------------|
| CID000005245 | CID000005253 | CID000005291 | CID000005344 | CID000005352 |
| CID000005358 | CID000005372 | CID000005376 | CID000005379 | CID000005391 |
| CID000005394 | CID000005401 | CID000005402 | CID000005403 | CID000005408 |
| CID000005412 | CID000005430 | CID000005453 | CID000005466 | CID000005472 |
| CID000005478 | CID000005479 | CID000005486 | CID000005487 | CID000005496 |
| CID000005503 | CID000005508 | CID000005512 | CID000005514 | CID000005516 |
| CID000005523 | CID000005525 | CID000005526 | CID000005530 | CID000005533 |
| CID000005538 | CID000005544 | CID000005546 | CID000005556 | CID000005566 |
| CID000005572 | CID000005584 | CID000005625 | CID000005636 | CID000005645 |
| CID000005647 | CID000005650 | CID000005651 | CID000005665 | CID000005672 |
| CID000005717 | CID000005718 | CID000005719 | CID000005721 | CID000005726 |
| CID000005731 | CID000005732 | CID000005734 | CID000005735 | CID000005775 |
| CID000005978 | CID000006058 | CID000006476 | CID000006691 | CID000007029 |
| CID000008612 | CID000010100 | CID000010631 | CID000013342 | CID000014888 |
| CID000016362 | CID000020585 | CID000027400 | CID000027661 | CID000027686 |
| CID000027991 | CID000028112 | CID000030623 | CID000031477 | CID000032800 |
| CID000034312 | CID000039042 | CID000039860 | CID000040159 | CID000040976 |
| CID000041317 | CID000041693 | CID000041781 | CID000042113 | CID000042615 |
| CID000044564 | CID000047725 | CID000050294 | CID000051263 | CID000051634 |
| CID000054454 | CID000054547 | CID000054688 | CID000054786 | CID000056959 |
| CID000057469 | CID000057537 | CID000059708 | CID000059768 | CID000060184 |
| CID000060198 | CID000060612 | CID000060613 | CID000060714 | CID000060753 |
| CID000060754 | CID000060787 | CID000060795 | CID000060852 | CID000060865 |
| CID000060877 | CID000060953 | CID000062816 | CID000062819 | CID000062867 |
| CID000062924 | CID000062959 | CID000064147 | CID000065027 | CID000065999 |
| CID000068740 | CID000068844 | CID000071158 | CID000071273 | CID000071301 |
| CID000071329 | CID000071616 | CID000072054 | CID000072938 | CID000074989 |
| CID000077992 | CID000077993 | CID000077999 | CID000082146 | CID000083786 |
| CID000093860 | CID000096312 | CID000104741 | CID000104865 | CID000110634 |
| CID000110635 | CID000115237 | CID000119182 | CID000119607 | CID000122316 |
| CID000123606 | CID000124087 | CID000125017 | CID000125889 | CID000130881 |
| CID000147912 | CID000148192 | CID000148211 | CID000150310 | CID000150311 |
| CID000150610 | CID000151165 | CID000152945 | CID000153941 | CID000158440 |
| CID000163742 | CID000166548 | CID000170361 | CID000176870 | CID000197712 |
| CID000213039 | CID000216239 | CID000216326 | CID000443871 | CID000444013 |
| CID000444033 | CID000450096 | CID000477468 | CID002761171 | CID003002190 |
| CID003062316 | CID003081884 | CID003086672 | CID004183806 | CID004479097 |
| CID004659568 | CID004659569 | CID005229711 | CID005281104 | CID005282044 |
| CID005311027 | CID005311181 | CID005329102 | CID005353894 | CID005353980 |
| CID005362420 | CID005381226 | CID005481350 | CID005487301 | CID005493381 |
| CID005493444 | CID006323497 | CID006398525 | CID006398970 | CID006435110 |
| CID006436173 | CID009571074 | CID011947681 |              |              |

(6)  $S_6$ : 582 drug compounds having side effect “Diarrhea”

|              |              |              |              |              |
|--------------|--------------|--------------|--------------|--------------|
| CID00000085  | CID000000143 | CID000000158 | CID000000159 | CID000000206 |
| CID000000214 | CID000000247 | CID000000298 | CID000000444 | CID000000450 |
| CID000000453 | CID000000564 | CID000000596 | CID000000598 | CID000000750 |
| CID000000767 | CID000000772 | CID000000807 | CID000000815 | CID000000853 |
| CID000000937 | CID000000942 | CID000001003 | CID000001065 | CID000001125 |
| CID000001134 | CID000001206 | CID000001546 | CID000001690 | CID000001775 |
| CID000001935 | CID000001971 | CID000001972 | CID000001978 | CID000001986 |
| CID000002022 | CID000002083 | CID000002092 | CID000002130 | CID000002131 |
| CID000002140 | CID000002153 | CID000002156 | CID000002160 | CID000002162 |
| CID000002170 | CID000002173 | CID000002177 | CID000002179 | CID000002182 |
| CID000002187 | CID000002215 | CID000002216 | CID000002232 | CID000002244 |
| CID000002249 | CID000002250 | CID000002265 | CID000002267 | CID000002269 |
| CID000002274 | CID000002284 | CID000002311 | CID000002315 | CID000002369 |
| CID000002370 | CID000002375 | CID000002405 | CID000002431 | CID000002443 |
| CID000002462 | CID000002471 | CID000002476 | CID000002478 | CID000002512 |
| CID000002520 | CID000002541 | CID000002550 | CID000002554 | CID000002559 |
| CID000002564 | CID000002575 | CID000002578 | CID000002585 | CID000002609 |
| CID000002610 | CID000002617 | CID000002622 | CID000002629 | CID000002631 |
| CID000002637 | CID000002646 | CID000002650 | CID000002654 | CID000002655 |
| CID000002656 | CID000002658 | CID000002662 | CID000002666 | CID000002675 |
| CID000002676 | CID000002678 | CID000002708 | CID000002719 | CID000002720 |
| CID000002725 | CID000002727 | CID000002732 | CID000002751 | CID000002756 |
| CID000002762 | CID000002764 | CID000002769 | CID000002771 | CID000002781 |
| CID000002794 | CID000002800 | CID000002801 | CID000002802 | CID000002806 |
| CID000002818 | CID000002891 | CID000002895 | CID000002907 | CID000002909 |
| CID000002913 | CID000002951 | CID000002958 | CID000002973 | CID000002978 |
| CID000002983 | CID000002995 | CID000003007 | CID000003015 | CID000003016 |
| CID000003019 | CID000003032 | CID000003040 | CID000003043 | CID000003059 |
| CID000003062 | CID000003066 | CID000003075 | CID000003100 | CID000003108 |
| CID000003114 | CID000003121 | CID000003125 | CID000003143 | CID000003148 |
| CID000003151 | CID000003152 | CID000003154 | CID000003156 | CID000003157 |
| CID000003158 | CID000003203 | CID000003222 | CID000003255 | CID000003278 |
| CID000003285 | CID000003291 | CID000003292 | CID000003305 | CID000003308 |
| CID000003310 | CID000003324 | CID000003325 | CID000003333 | CID000003339 |
| CID000003340 | CID000003342 | CID000003345 | CID000003348 | CID000003355 |
| CID000003366 | CID000003367 | CID000003379 | CID000003385 | CID000003386 |
| CID000003393 | CID000003394 | CID000003397 | CID000003403 | CID000003404 |
| CID000003406 | CID000003410 | CID000003414 | CID000003417 | CID000003419 |
| CID000003440 | CID000003446 | CID000003449 | CID000003454 | CID000003461 |
| CID000003463 | CID000003475 | CID000003476 | CID000003478 | CID000003488 |
| CID000003510 | CID000003512 | CID000003518 | CID000003519 | CID000003559 |
| CID000003636 | CID000003637 | CID000003639 | CID000003647 | CID000003648 |
| CID000003652 | CID000003657 | CID000003672 | CID000003685 | CID000003690 |
| CID000003696 | CID000003702 | CID000003706 | CID000003715 | CID000003724 |



|              |              |              |              |              |
|--------------|--------------|--------------|--------------|--------------|
| CID000003730 | CID000003736 | CID000003741 | CID000003746 | CID000003749 |
| CID000003759 | CID000003784 | CID000003793 | CID000003823 | CID000003825 |
| CID000003826 | CID000003827 | CID000003869 | CID000003877 | CID000003878 |
| CID000003883 | CID000003899 | CID000003902 | CID000003911 | CID000003914 |
| CID000003928 | CID000003929 | CID000003937 | CID000003948 | CID000003956 |
| CID000003957 | CID000003961 | CID000003962 | CID000003998 | CID000004011 |
| CID000004033 | CID000004036 | CID000004044 | CID000004046 | CID000004053 |
| CID000004054 | CID000004064 | CID000004086 | CID000004091 | CID000004095 |
| CID000004100 | CID000004112 | CID000004121 | CID000004138 | CID000004140 |
| CID000004158 | CID000004163 | CID000004168 | CID000004170 | CID000004171 |
| CID000004173 | CID000004178 | CID000004196 | CID000004200 | CID000004201 |
| CID000004205 | CID000004211 | CID000004212 | CID000004236 | CID000004253 |
| CID000004259 | CID000004264 | CID000004409 | CID000004411 | CID000004421 |
| CID000004425 | CID000004428 | CID000004440 | CID000004449 | CID000004451 |
| CID000004463 | CID000004473 | CID000004485 | CID000004493 | CID000004497 |
| CID000004506 | CID000004509 | CID000004513 | CID000004539 | CID000004542 |
| CID000004543 | CID000004547 | CID000004583 | CID000004585 | CID000004594 |
| CID000004595 | CID000004603 | CID000004607 | CID000004609 | CID000004614 |
| CID000004634 | CID000004635 | CID000004638 | CID000004645 | CID000004666 |
| CID000004679 | CID000004689 | CID000004691 | CID000004724 | CID000004727 |
| CID000004730 | CID000004736 | CID000004739 | CID000004740 | CID000004745 |
| CID000004748 | CID000004771 | CID000004819 | CID000004828 | CID000004829 |
| CID000004834 | CID000004845 | CID000004856 | CID000004870 | CID000004873 |
| CID000004885 | CID000004889 | CID000004891 | CID000004893 | CID000004913 |
| CID000004915 | CID000004920 | CID000004932 | CID000004943 | CID000004946 |
| CID000004976 | CID000004991 | CID000005002 | CID000005005 | CID000005029 |
| CID000005035 | CID000005038 | CID000005039 | CID000005040 | CID000005052 |
| CID000005064 | CID000005070 | CID000005071 | CID000005073 | CID000005076 |
| CID000005077 | CID000005078 | CID000005090 | CID000005095 | CID000005152 |
| CID000005155 | CID000005195 | CID000005203 | CID000005210 | CID000005212 |
| CID000005215 | CID000005245 | CID000005253 | CID000005267 | CID000005291 |
| CID000005300 | CID000005344 | CID000005352 | CID000005358 | CID000005372 |
| CID000005376 | CID000005391 | CID000005394 | CID000005396 | CID000005401 |
| CID000005402 | CID000005408 | CID000005412 | CID000005426 | CID000005430 |
| CID000005452 | CID000005454 | CID000005466 | CID000005472 | CID000005478 |
| CID000005479 | CID000005487 | CID000005496 | CID000005504 | CID000005508 |
| CID000005512 | CID000005514 | CID000005515 | CID000005523 | CID000005525 |
| CID000005526 | CID000005530 | CID000005533 | CID000005538 | CID000005544 |
| CID000005546 | CID000005556 | CID000005584 | CID000005625 | CID000005645 |
| CID000005647 | CID000005650 | CID000005656 | CID000005665 | CID000005672 |
| CID000005717 | CID000005718 | CID000005721 | CID000005726 | CID000005731 |
| CID000005732 | CID000005734 | CID000005735 | CID000005746 | CID000005775 |
| CID000005978 | CID000006049 | CID000006058 | CID000006476 | CID000006691 |
| CID000007029 | CID000009433 | CID000009904 | CID000010631 | CID000013342 |

|              |              |              |              |              |
|--------------|--------------|--------------|--------------|--------------|
| CID000014888 | CID000018140 | CID000019090 | CID000020585 | CID000025419 |
| CID000027661 | CID000027991 | CID000028112 | CID000030623 | CID000032800 |
| CID000034312 | CID000038904 | CID000039042 | CID000039860 | CID000040159 |
| CID000040976 | CID000041317 | CID000041744 | CID000041774 | CID000041781 |
| CID000042615 | CID000047725 | CID000050294 | CID000050614 | CID000051577 |
| CID000051634 | CID000054454 | CID000054547 | CID000054688 | CID000054786 |
| CID000057469 | CID000057537 | CID000059708 | CID000060184 | CID000060198 |
| CID000060612 | CID000060613 | CID000060714 | CID000060753 | CID000060754 |
| CID000060787 | CID000060795 | CID000060843 | CID000060852 | CID000060865 |
| CID000060871 | CID000060877 | CID000060953 | CID000062816 | CID000062819 |
| CID000062924 | CID000062959 | CID000064147 | CID000065027 | CID000065999 |
| CID000068740 | CID000068844 | CID000071158 | CID000071273 | CID000071301 |
| CID000071329 | CID000071616 | CID000072054 | CID000072938 | CID000074989 |
| CID000077992 | CID000077993 | CID000077999 | CID000082146 | CID000083786 |
| CID000093860 | CID000096312 | CID000104741 | CID000104758 | CID000104865 |
| CID000110634 | CID000110635 | CID000115237 | CID000119182 | CID000119607 |
| CID000122316 | CID000123606 | CID000123620 | CID000123631 | CID000124087 |
| CID000125017 | CID000125889 | CID000130881 | CID000147912 | CID000148192 |
| CID000148211 | CID000150310 | CID000150311 | CID000150610 | CID000151165 |
| CID000153941 | CID000158440 | CID000160051 | CID000163742 | CID000166548 |
| CID000170361 | CID000176168 | CID000176870 | CID000197712 | CID000213039 |
| CID000216239 | CID000216326 | CID000443871 | CID000444013 | CID000477468 |
| CID000667490 | CID002761171 | CID003002190 | CID003062316 | CID003081884 |
| CID004183806 | CID004479097 | CID004659568 | CID004659569 | CID005229711 |
| CID005281007 | CID005281104 | CID005282044 | CID005311181 | CID005311297 |
| CID005329102 | CID005353980 | CID005361912 | CID005362070 | CID005381226 |
| CID005481350 | CID005487301 | CID005493381 | CID005493444 | CID006323497 |
| CID006398525 | CID006398970 | CID006435110 | CID006447131 | CID006918453 |
| CID009571074 | CID011954225 |              |              |              |

(7)  $S_7$ : 561 drug compounds having side effect "Pruritus"

|              |              |              |              |              |
|--------------|--------------|--------------|--------------|--------------|
| CID000000085 | CID000000137 | CID000000143 | CID000000159 | CID000000214 |
| CID000000271 | CID000000298 | CID000000444 | CID000000564 | CID000000581 |
| CID000000596 | CID000000727 | CID000000738 | CID000000767 | CID000000772 |
| CID000000807 | CID000000853 | CID000000937 | CID000000942 | CID000001003 |
| CID000001046 | CID000001065 | CID000001134 | CID000001546 | CID000001775 |
| CID000001935 | CID000001972 | CID000001978 | CID000002022 | CID000002083 |
| CID000002088 | CID000002092 | CID000002118 | CID000002123 | CID000002130 |
| CID000002140 | CID000002141 | CID000002145 | CID000002156 | CID000002162 |
| CID000002170 | CID000002177 | CID000002182 | CID000002187 | CID000002216 |
| CID000002244 | CID000002249 | CID000002250 | CID000002266 | CID000002269 |
| CID000002274 | CID000002284 | CID000002311 | CID000002315 | CID000002349 |
| CID000002366 | CID000002369 | CID000002375 | CID000002405 | CID000002435 |
| CID000002441 | CID000002462 | CID000002471 | CID000002474 | CID000002476 |

|              |              |              |              |              |
|--------------|--------------|--------------|--------------|--------------|
| CID000002477 | CID000002478 | CID000002484 | CID000002487 | CID000002512 |
| CID000002520 | CID000002522 | CID000002524 | CID000002541 | CID000002550 |
| CID000002554 | CID000002559 | CID000002575 | CID000002576 | CID000002585 |
| CID000002609 | CID000002610 | CID000002617 | CID000002622 | CID000002631 |
| CID000002637 | CID000002646 | CID000002650 | CID000002654 | CID000002655 |
| CID000002656 | CID000002658 | CID000002662 | CID000002673 | CID000002675 |
| CID000002676 | CID000002708 | CID000002719 | CID000002727 | CID000002749 |
| CID000002751 | CID000002762 | CID000002764 | CID000002769 | CID000002771 |
| CID000002786 | CID000002794 | CID000002800 | CID000002801 | CID000002802 |
| CID000002803 | CID000002806 | CID000002812 | CID000002818 | CID000002891 |
| CID000002895 | CID000002907 | CID000002909 | CID000002949 | CID000002951 |
| CID000002955 | CID000002958 | CID000002973 | CID000002978 | CID000002995 |
| CID000003000 | CID000003003 | CID000003009 | CID000003015 | CID000003016 |
| CID000003032 | CID000003040 | CID000003042 | CID000003043 | CID000003059 |
| CID000003066 | CID000003075 | CID000003105 | CID000003108 | CID000003114 |
| CID000003121 | CID000003143 | CID000003148 | CID000003151 | CID000003152 |
| CID000003154 | CID000003156 | CID000003157 | CID000003198 | CID000003203 |
| CID000003219 | CID000003222 | CID000003251 | CID000003255 | CID000003261 |
| CID000003279 | CID000003285 | CID000003305 | CID000003308 | CID000003310 |
| CID000003325 | CID000003333 | CID000003339 | CID000003342 | CID000003345 |
| CID000003350 | CID000003355 | CID000003365 | CID000003366 | CID000003367 |
| CID000003372 | CID000003373 | CID000003375 | CID000003379 | CID000003381 |
| CID000003382 | CID000003385 | CID000003386 | CID000003392 | CID000003393 |
| CID000003394 | CID000003403 | CID000003404 | CID000003405 | CID000003410 |
| CID000003414 | CID000003417 | CID000003419 | CID000003440 | CID000003446 |
| CID000003454 | CID000003461 | CID000003463 | CID000003467 | CID000003475 |
| CID000003476 | CID000003478 | CID000003488 | CID000003494 | CID000003510 |
| CID000003519 | CID000003553 | CID000003637 | CID000003640 | CID000003648 |
| CID000003652 | CID000003672 | CID000003675 | CID000003685 | CID000003696 |
| CID000003702 | CID000003706 | CID000003715 | CID000003724 | CID000003734 |
| CID000003736 | CID000003737 | CID000003741 | CID000003742 | CID000003746 |
| CID000003749 | CID000003784 | CID000003793 | CID000003823 | CID000003825 |
| CID000003869 | CID000003877 | CID000003878 | CID000003883 | CID000003890 |
| CID000003899 | CID000003902 | CID000003911 | CID000003914 | CID000003929 |
| CID000003937 | CID000003948 | CID000003954 | CID000003956 | CID000003961 |
| CID000003962 | CID000003964 | CID000003998 | CID000004011 | CID000004036 |
| CID000004044 | CID000004046 | CID000004053 | CID000004054 | CID000004058 |
| CID000004062 | CID000004064 | CID000004075 | CID000004078 | CID000004086 |
| CID000004091 | CID000004095 | CID000004101 | CID000004107 | CID000004112 |
| CID000004114 | CID000004158 | CID000004170 | CID000004171 | CID000004173 |
| CID000004192 | CID000004195 | CID000004196 | CID000004200 | CID000004201 |
| CID000004205 | CID000004236 | CID000004253 | CID000004259 | CID000004264 |
| CID000004409 | CID000004411 | CID000004419 | CID000004421 | CID000004428 |
| CID000004440 | CID000004449 | CID000004451 | CID000004463 | CID000004485 |

|              |              |              |              |              |
|--------------|--------------|--------------|--------------|--------------|
| CID000004493 | CID000004497 | CID000004509 | CID000004510 | CID000004513 |
| CID000004536 | CID000004539 | CID000004542 | CID000004543 | CID000004583 |
| CID000004585 | CID000004594 | CID000004595 | CID000004599 | CID000004601 |
| CID000004607 | CID000004609 | CID000004614 | CID000004623 | CID000004634 |
| CID000004635 | CID000004666 | CID000004679 | CID000004691 | CID000004725 |
| CID000004727 | CID000004736 | CID000004739 | CID000004740 | CID000004745 |
| CID000004748 | CID000004819 | CID000004828 | CID000004834 | CID000004845 |
| CID000004856 | CID000004865 | CID000004885 | CID000004889 | CID000004893 |
| CID000004911 | CID000004913 | CID000004914 | CID000004915 | CID000004917 |
| CID000004920 | CID000004932 | CID000004943 | CID000004976 | CID000005002 |
| CID000005005 | CID000005029 | CID000005038 | CID000005039 | CID000005040 |
| CID000005052 | CID000005064 | CID000005070 | CID000005073 | CID000005076 |
| CID000005077 | CID000005078 | CID000005090 | CID000005095 | CID000005155 |
| CID000005195 | CID000005203 | CID000005206 | CID000005210 | CID000005212 |
| CID000005215 | CID000005245 | CID000005253 | CID000005291 | CID000005318 |
| CID000005320 | CID000005344 | CID000005352 | CID000005358 | CID000005359 |
| CID000005372 | CID000005376 | CID000005379 | CID000005394 | CID000005396 |
| CID000005401 | CID000005402 | CID000005404 | CID000005408 | CID000005426 |
| CID000005430 | CID000005453 | CID000005454 | CID000005466 | CID000005472 |
| CID000005478 | CID000005479 | CID000005487 | CID000005496 | CID000005503 |
| CID000005505 | CID000005514 | CID000005515 | CID000005516 | CID000005523 |
| CID000005525 | CID000005533 | CID000005538 | CID000005544 | CID000005556 |
| CID000005566 | CID000005578 | CID000005582 | CID000005584 | CID000005596 |
| CID000005625 | CID000005636 | CID000005645 | CID000005647 | CID000005650 |
| CID000005651 | CID000005656 | CID000005672 | CID000005717 | CID000005718 |
| CID000005719 | CID000005726 | CID000005731 | CID000005732 | CID000005734 |
| CID000005735 | CID000005775 | CID000006691 | CID000007187 | CID000008612 |
| CID000009034 | CID000010631 | CID000012536 | CID000012620 | CID000014888 |
| CID000016362 | CID000016850 | CID000018140 | CID000019090 | CID000020585 |
| CID000027661 | CID000027991 | CID000028112 | CID000032797 | CID000034312 |
| CID000036811 | CID000038904 | CID000039042 | CID000039507 | CID000039860 |
| CID000040159 | CID000040976 | CID000041317 | CID000041693 | CID000041744 |
| CID000042113 | CID000042615 | CID000044564 | CID000047319 | CID000047320 |
| CID000047641 | CID000048175 | CID000050614 | CID000051263 | CID000052421 |
| CID000054454 | CID000054547 | CID000054688 | CID000054786 | CID000057469 |
| CID000057537 | CID000059708 | CID000059768 | CID000060164 | CID000060184 |
| CID000060198 | CID000060613 | CID000060714 | CID000060754 | CID000060787 |
| CID000060795 | CID000060843 | CID000060871 | CID000060877 | CID000060953 |
| CID000062819 | CID000062867 | CID000062924 | CID000062959 | CID000064147 |
| CID000065027 | CID000065863 | CID000065999 | CID000068740 | CID000068844 |
| CID000071158 | CID000071273 | CID000071301 | CID000071616 | CID000072054 |
| CID000072938 | CID000074989 | CID000077992 | CID000077993 | CID000077999 |
| CID000082146 | CID000083786 | CID000093860 | CID000104741 | CID000104758 |
| CID000104865 | CID000110634 | CID000110635 | CID000115237 | CID000119182 |

|              |              |              |              |              |
|--------------|--------------|--------------|--------------|--------------|
| CID000119607 | CID000122316 | CID000123606 | CID000123620 | CID000123631 |
| CID000125889 | CID000130881 | CID000147912 | CID000148192 | CID000148211 |
| CID000150610 | CID000151165 | CID000152945 | CID000158440 | CID000163742 |
| CID000166548 | CID000170361 | CID000176870 | CID000197712 | CID000213039 |
| CID000216239 | CID000216326 | CID000443871 | CID000444013 | CID000450096 |
| CID000477468 | CID000657298 | CID001349907 | CID003002190 | CID003062316 |
| CID003081884 | CID003086672 | CID004479097 | CID004630253 | CID004659568 |
| CID004659569 | CID005281104 | CID005282044 | CID005282226 | CID005311027 |
| CID005311297 | CID005353980 | CID005362070 | CID005362420 | CID005381226 |
| CID005481350 | CID005487301 | CID006323497 | CID006398525 | CID006398970 |
| CID006435110 | CID006436173 | CID006447131 | CID006918453 | CID009571074 |
| CID011954225 |              |              |              |              |

(8)  $S_8$ : 490 drug compounds having side effect "Urticaria"

|              |              |              |              |              |
|--------------|--------------|--------------|--------------|--------------|
| CID000000119 | CID000000143 | CID000000159 | CID000000298 | CID000000444 |
| CID000000450 | CID000000453 | CID000000581 | CID000000596 | CID000000727 |
| CID000000750 | CID000000772 | CID000000807 | CID000000853 | CID000000937 |
| CID000001003 | CID000001046 | CID000001065 | CID000001206 | CID000001546 |
| CID000001690 | CID000001775 | CID000001935 | CID000001971 | CID000001972 |
| CID000001978 | CID000001986 | CID000002021 | CID000002022 | CID000002082 |
| CID000002083 | CID000002088 | CID000002092 | CID000002099 | CID000002118 |
| CID000002140 | CID000002141 | CID000002145 | CID000002148 | CID000002160 |
| CID000002162 | CID000002170 | CID000002171 | CID000002173 | CID000002179 |
| CID000002182 | CID000002187 | CID000002244 | CID000002250 | CID000002269 |
| CID000002274 | CID000002284 | CID000002308 | CID000002315 | CID000002349 |
| CID000002366 | CID000002369 | CID000002375 | CID000002405 | CID000002462 |
| CID000002471 | CID000002474 | CID000002476 | CID000002477 | CID000002478 |
| CID000002487 | CID000002520 | CID000002524 | CID000002541 | CID000002550 |
| CID000002554 | CID000002559 | CID000002575 | CID000002585 | CID000002609 |
| CID000002610 | CID000002617 | CID000002622 | CID000002631 | CID000002637 |
| CID000002646 | CID000002650 | CID000002654 | CID000002656 | CID000002658 |
| CID000002662 | CID000002666 | CID000002673 | CID000002675 | CID000002676 |
| CID000002708 | CID000002713 | CID000002720 | CID000002726 | CID000002727 |
| CID000002732 | CID000002751 | CID000002762 | CID000002764 | CID000002769 |
| CID000002771 | CID000002786 | CID000002800 | CID000002801 | CID000002802 |
| CID000002803 | CID000002806 | CID000002812 | CID000002818 | CID000002891 |
| CID000002895 | CID000002907 | CID000002909 | CID000002949 | CID000002951 |
| CID000002958 | CID000002973 | CID000002983 | CID000002995 | CID000003007 |
| CID000003015 | CID000003016 | CID000003032 | CID000003040 | CID000003042 |
| CID000003059 | CID000003066 | CID000003075 | CID000003108 | CID000003114 |
| CID000003125 | CID000003148 | CID000003151 | CID000003152 | CID000003154 |
| CID000003157 | CID000003203 | CID000003222 | CID000003255 | CID000003261 |
| CID000003285 | CID000003291 | CID000003305 | CID000003308 | CID000003310 |
| CID000003324 | CID000003325 | CID000003333 | CID000003339 | CID000003342 |

|              |              |              |              |              |
|--------------|--------------|--------------|--------------|--------------|
| CID000003345 | CID000003350 | CID000003354 | CID000003355 | CID000003365 |
| CID000003366 | CID000003372 | CID000003373 | CID000003379 | CID000003385 |
| CID000003386 | CID000003394 | CID000003403 | CID000003410 | CID000003419 |
| CID000003440 | CID000003446 | CID000003454 | CID000003463 | CID000003467 |
| CID000003475 | CID000003476 | CID000003478 | CID000003488 | CID000003494 |
| CID000003510 | CID000003512 | CID000003636 | CID000003637 | CID000003639 |
| CID000003647 | CID000003648 | CID000003652 | CID000003672 | CID000003676 |
| CID000003685 | CID000003696 | CID000003702 | CID000003706 | CID000003715 |
| CID000003724 | CID000003734 | CID000003736 | CID000003737 | CID000003741 |
| CID000003742 | CID000003746 | CID000003749 | CID000003784 | CID000003793 |
| CID000003823 | CID000003825 | CID000003826 | CID000003827 | CID000003869 |
| CID000003877 | CID000003878 | CID000003883 | CID000003899 | CID000003902 |
| CID000003911 | CID000003914 | CID000003928 | CID000003929 | CID000003937 |
| CID000003948 | CID000003954 | CID000003956 | CID000003961 | CID000003962 |
| CID000003998 | CID000004030 | CID000004036 | CID000004044 | CID000004046 |
| CID000004053 | CID000004054 | CID000004057 | CID000004058 | CID000004060 |
| CID000004062 | CID000004064 | CID000004075 | CID000004086 | CID000004091 |
| CID000004095 | CID000004100 | CID000004107 | CID000004112 | CID000004114 |
| CID000004121 | CID000004158 | CID000004168 | CID000004170 | CID000004171 |
| CID000004173 | CID000004189 | CID000004192 | CID000004196 | CID000004200 |
| CID000004201 | CID000004205 | CID000004212 | CID000004236 | CID000004253 |
| CID000004259 | CID000004264 | CID000004409 | CID000004419 | CID000004421 |
| CID000004428 | CID000004440 | CID000004449 | CID000004451 | CID000004463 |
| CID000004485 | CID000004493 | CID000004509 | CID000004513 | CID000004536 |
| CID000004539 | CID000004542 | CID000004543 | CID000004583 | CID000004585 |
| CID000004594 | CID000004595 | CID000004599 | CID000004601 | CID000004603 |
| CID000004607 | CID000004609 | CID000004614 | CID000004616 | CID000004635 |
| CID000004645 | CID000004679 | CID000004691 | CID000004725 | CID000004727 |
| CID000004730 | CID000004739 | CID000004740 | CID000004748 | CID000004771 |
| CID000004834 | CID000004856 | CID000004870 | CID000004885 | CID000004889 |
| CID000004891 | CID000004893 | CID000004894 | CID000004900 | CID000004911 |
| CID000004913 | CID000004914 | CID000004915 | CID000004917 | CID000004920 |
| CID000004932 | CID000004934 | CID000004943 | CID000004946 | CID000004976 |
| CID000004991 | CID000005005 | CID000005029 | CID000005038 | CID000005039 |
| CID000005070 | CID000005073 | CID000005076 | CID000005077 | CID000005078 |
| CID000005090 | CID000005095 | CID000005152 | CID000005195 | CID000005203 |
| CID000005206 | CID000005210 | CID000005212 | CID000005215 | CID000005245 |
| CID000005267 | CID000005297 | CID000005344 | CID000005358 | CID000005372 |
| CID000005379 | CID000005396 | CID000005402 | CID000005408 | CID000005412 |
| CID000005426 | CID000005452 | CID000005453 | CID000005454 | CID000005466 |
| CID000005472 | CID000005478 | CID000005479 | CID000005486 | CID000005487 |
| CID000005496 | CID000005503 | CID000005505 | CID000005508 | CID000005514 |
| CID000005515 | CID000005523 | CID000005530 | CID000005533 | CID000005538 |
| CID000005544 | CID000005566 | CID000005584 | CID000005596 | CID000005625 |

|              |              |              |              |              |
|--------------|--------------|--------------|--------------|--------------|
| CID000005645 | CID000005647 | CID000005650 | CID000005651 | CID000005656 |
| CID000005672 | CID000005717 | CID000005718 | CID000005719 | CID000005721 |
| CID000005726 | CID000005731 | CID000005732 | CID000005734 | CID000005735 |
| CID000006058 | CID000006476 | CID000006691 | CID000007029 | CID000008612 |
| CID000009034 | CID000010631 | CID000014888 | CID000016362 | CID000016850 |
| CID000020585 | CID000030623 | CID000031378 | CID000032797 | CID000034312 |
| CID000038904 | CID000039042 | CID000041317 | CID000041774 | CID000042615 |
| CID000047319 | CID000047725 | CID000048175 | CID000050614 | CID000051263 |
| CID000052421 | CID000054454 | CID000054547 | CID000054688 | CID000059768 |
| CID000060164 | CID000060184 | CID000060613 | CID000060714 | CID000060754 |
| CID000060787 | CID000060795 | CID000060877 | CID000060953 | CID000062816 |
| CID000062867 | CID000062924 | CID000062959 | CID000064147 | CID000065999 |
| CID000068740 | CID000068844 | CID000071158 | CID000071273 | CID000071301 |
| CID000071616 | CID000072938 | CID000074989 | CID000077993 | CID000077999 |
| CID000083786 | CID000093860 | CID000104741 | CID000104865 | CID000110635 |
| CID000119607 | CID000122316 | CID000123631 | CID000125889 | CID000130881 |
| CID000147912 | CID000148192 | CID000150311 | CID000150610 | CID000151165 |
| CID000152945 | CID000158440 | CID000166548 | CID000170361 | CID000216239 |
| CID000216326 | CID000443871 | CID000444013 | CID000444033 | CID000477468 |
| CID000657298 | CID001349907 | CID003002190 | CID003062316 | CID003081884 |
| CID004479097 | CID004659568 | CID004659569 | CID005281007 | CID005281104 |
| CID005282044 | CID005311297 | CID005353980 | CID005362420 | CID005381226 |
| CID005481350 | CID005487301 | CID005493381 | CID006323497 | CID006398525 |
| CID006435110 | CID006436173 | CID006447131 | CID006918453 | CID009571074 |

(9)  $\mathbb{S}_9$  : 480 drug compounds having side effect "Fever"

|              |              |              |              |              |
|--------------|--------------|--------------|--------------|--------------|
| CID000000085 | CID000000158 | CID000000159 | CID000000214 | CID000000298 |
| CID000000444 | CID000000450 | CID000000453 | CID000000581 | CID000000596 |
| CID000000598 | CID000000738 | CID000000767 | CID000000772 | CID000000807 |
| CID000000815 | CID000000853 | CID000000861 | CID000000937 | CID000000942 |
| CID000001046 | CID000001065 | CID000001125 | CID000001134 | CID000001546 |
| CID000001775 | CID000001935 | CID000001971 | CID000001978 | CID000001986 |
| CID000002021 | CID000002082 | CID000002083 | CID000002088 | CID000002118 |
| CID000002130 | CID000002141 | CID000002142 | CID000002145 | CID000002156 |
| CID000002160 | CID000002170 | CID000002179 | CID000002182 | CID000002187 |
| CID000002232 | CID000002249 | CID000002250 | CID000002265 | CID000002267 |
| CID000002269 | CID000002274 | CID000002284 | CID000002311 | CID000002315 |
| CID000002344 | CID000002369 | CID000002375 | CID000002405 | CID000002431 |
| CID000002462 | CID000002474 | CID000002476 | CID000002477 | CID000002478 |
| CID000002487 | CID000002524 | CID000002541 | CID000002550 | CID000002554 |
| CID000002559 | CID000002575 | CID000002576 | CID000002578 | CID000002585 |
| CID000002609 | CID000002610 | CID000002622 | CID000002629 | CID000002631 |
| CID000002637 | CID000002646 | CID000002650 | CID000002654 | CID000002655 |
| CID000002656 | CID000002658 | CID000002662 | CID000002666 | CID000002675 |

|              |              |              |              |              |
|--------------|--------------|--------------|--------------|--------------|
| CID000002676 | CID000002678 | CID000002708 | CID000002720 | CID000002726 |
| CID000002756 | CID000002769 | CID000002771 | CID000002794 | CID000002800 |
| CID000002801 | CID000002802 | CID000002803 | CID000002806 | CID000002818 |
| CID000002907 | CID000002909 | CID000002949 | CID000002955 | CID000002958 |
| CID000002973 | CID000002995 | CID000003007 | CID000003015 | CID000003016 |
| CID000003019 | CID000003032 | CID000003040 | CID000003043 | CID000003059 |
| CID000003066 | CID000003075 | CID000003114 | CID000003121 | CID000003143 |
| CID000003148 | CID000003152 | CID000003154 | CID000003156 | CID000003157 |
| CID000003158 | CID000003203 | CID000003222 | CID000003261 | CID000003278 |
| CID000003279 | CID000003285 | CID000003292 | CID000003308 | CID000003310 |
| CID000003324 | CID000003325 | CID000003333 | CID000003339 | CID000003340 |
| CID000003342 | CID000003345 | CID000003348 | CID000003355 | CID000003365 |
| CID000003366 | CID000003367 | CID000003372 | CID000003379 | CID000003381 |
| CID000003386 | CID000003394 | CID000003403 | CID000003404 | CID000003406 |
| CID000003410 | CID000003414 | CID000003417 | CID000003419 | CID000003440 |
| CID000003446 | CID000003449 | CID000003454 | CID000003461 | CID000003467 |
| CID000003475 | CID000003494 | CID000003510 | CID000003637 | CID000003639 |
| CID000003648 | CID000003657 | CID000003675 | CID000003676 | CID000003685 |
| CID000003690 | CID000003696 | CID000003698 | CID000003702 | CID000003706 |
| CID000003715 | CID000003724 | CID000003730 | CID000003734 | CID000003736 |
| CID000003737 | CID000003739 | CID000003741 | CID000003742 | CID000003749 |
| CID000003750 | CID000003784 | CID000003823 | CID000003826 | CID000003827 |
| CID000003869 | CID000003877 | CID000003883 | CID000003899 | CID000003902 |
| CID000003911 | CID000003928 | CID000003929 | CID000003937 | CID000003961 |
| CID000003962 | CID000004011 | CID000004044 | CID000004046 | CID000004053 |
| CID000004064 | CID000004075 | CID000004078 | CID000004095 | CID000004107 |
| CID000004112 | CID000004121 | CID000004138 | CID000004158 | CID000004163 |
| CID000004168 | CID000004171 | CID000004173 | CID000004178 | CID000004196 |
| CID000004201 | CID000004205 | CID000004212 | CID000004236 | CID000004253 |
| CID000004259 | CID000004409 | CID000004411 | CID000004419 | CID000004425 |
| CID000004428 | CID000004440 | CID000004449 | CID000004451 | CID000004463 |
| CID000004485 | CID000004493 | CID000004509 | CID000004513 | CID000004539 |
| CID000004542 | CID000004543 | CID000004583 | CID000004585 | CID000004594 |
| CID000004595 | CID000004607 | CID000004609 | CID000004614 | CID000004616 |
| CID000004635 | CID000004666 | CID000004679 | CID000004691 | CID000004724 |
| CID000004727 | CID000004730 | CID000004737 | CID000004739 | CID000004740 |
| CID000004745 | CID000004748 | CID000004819 | CID000004828 | CID000004834 |
| CID000004856 | CID000004885 | CID000004889 | CID000004891 | CID000004893 |
| CID000004911 | CID000004913 | CID000004915 | CID000004917 | CID000004920 |
| CID000004932 | CID000004943 | CID000004946 | CID000004976 | CID000005002 |
| CID000005029 | CID000005035 | CID000005038 | CID000005039 | CID000005040 |
| CID000005064 | CID000005070 | CID000005073 | CID000005076 | CID000005077 |
| CID000005078 | CID000005090 | CID000005095 | CID000005152 | CID000005155 |
| CID000005193 | CID000005195 | CID000005203 | CID000005206 | CID000005210 |



|              |              |              |              |              |
|--------------|--------------|--------------|--------------|--------------|
| CID000005212 | CID000005215 | CID000005245 | CID000005253 | CID000005267 |
| CID000005291 | CID000005297 | CID000005300 | CID000005344 | CID000005352 |
| CID000005358 | CID000005372 | CID000005379 | CID000005394 | CID000005396 |
| CID000005401 | CID000005402 | CID000005404 | CID000005426 | CID000005452 |
| CID000005453 | CID000005466 | CID000005478 | CID000005479 | CID000005486 |
| CID000005487 | CID000005496 | CID000005508 | CID000005514 | CID000005515 |
| CID000005523 | CID000005525 | CID000005533 | CID000005538 | CID000005544 |
| CID000005566 | CID000005578 | CID000005582 | CID000005584 | CID000005591 |
| CID000005625 | CID000005645 | CID000005651 | CID000005656 | CID000005665 |
| CID000005672 | CID000005717 | CID000005718 | CID000005719 | CID000005726 |
| CID000005731 | CID000005732 | CID000005735 | CID000005746 | CID000005978 |
| CID000006049 | CID000006058 | CID000006476 | CID000006691 | CID000010631 |
| CID000014888 | CID000019090 | CID000027661 | CID000028112 | CID000030623 |
| CID000034312 | CID000038904 | CID000039860 | CID000040159 | CID000040976 |
| CID000041317 | CID000041693 | CID000041744 | CID000042113 | CID000042615 |
| CID000047725 | CID000050294 | CID000050614 | CID000054454 | CID000054547 |
| CID000054786 | CID000057469 | CID000059708 | CID000059768 | CID000060184 |
| CID000060198 | CID000060612 | CID000060613 | CID000060714 | CID000060754 |
| CID000060787 | CID000060795 | CID000060843 | CID000060871 | CID000060877 |
| CID000060953 | CID000062819 | CID000062924 | CID000062959 | CID000064147 |
| CID000065027 | CID000065999 | CID000068740 | CID000071158 | CID000071273 |
| CID000071616 | CID000072938 | CID000074989 | CID000077992 | CID000077993 |
| CID000082146 | CID000083786 | CID000093860 | CID000096312 | CID000104741 |
| CID000104758 | CID000104865 | CID000115237 | CID000119182 | CID000119607 |
| CID000122316 | CID000123606 | CID000123620 | CID000123631 | CID000124087 |
| CID000125889 | CID000130881 | CID000145068 | CID000147912 | CID000148192 |
| CID000148211 | CID000150610 | CID000151165 | CID000158440 | CID000163742 |
| CID000166548 | CID000170361 | CID000176870 | CID000197712 | CID000213039 |
| CID000216239 | CID000216326 | CID000443871 | CID000444013 | CID000477468 |
| CID000657298 | CID000667490 | CID001349907 | CID003062316 | CID003081884 |
| CID004183806 | CID004659568 | CID004659569 | CID005229711 | CID005281007 |
| CID005281104 | CID005282044 | CID005311297 | CID005329102 | CID005353980 |
| CID005361912 | CID005362070 | CID005362420 | CID005381226 | CID005481350 |
| CID005493381 | CID006398970 | CID006435110 | CID006447131 | CID009571074 |

(10)  $S_{10}$ : 461 drug compounds having side effect "Edema"

|              |              |              |              |              |
|--------------|--------------|--------------|--------------|--------------|
| CID000000137 | CID000000159 | CID000000187 | CID000000191 | CID000000206 |
| CID000000214 | CID000000247 | CID000000444 | CID000000450 | CID000000564 |
| CID000000581 | CID000000596 | CID000000598 | CID000000738 | CID000000750 |
| CID000000772 | CID000000807 | CID000000937 | CID000000942 | CID000001003 |
| CID000001546 | CID000001690 | CID000001775 | CID000001935 | CID000001971 |
| CID000001972 | CID000001978 | CID000002019 | CID000002022 | CID000002083 |
| CID000002092 | CID000002118 | CID000002130 | CID000002140 | CID000002141 |
| CID000002156 | CID000002160 | CID000002162 | CID000002170 | CID000002182 |

|              |              |              |              |              |
|--------------|--------------|--------------|--------------|--------------|
| CID000002187 | CID000002215 | CID000002216 | CID000002249 | CID000002250 |
| CID000002266 | CID000002267 | CID000002269 | CID000002284 | CID000002311 |
| CID000002349 | CID000002369 | CID000002375 | CID000002405 | CID000002435 |
| CID000002443 | CID000002462 | CID000002474 | CID000002477 | CID000002478 |
| CID000002487 | CID000002512 | CID000002520 | CID000002554 | CID000002578 |
| CID000002583 | CID000002585 | CID000002609 | CID000002650 | CID000002656 |
| CID000002662 | CID000002675 | CID000002676 | CID000002678 | CID000002712 |
| CID000002713 | CID000002726 | CID000002749 | CID000002751 | CID000002762 |
| CID000002764 | CID000002769 | CID000002771 | CID000002794 | CID000002800 |
| CID000002801 | CID000002802 | CID000002803 | CID000002806 | CID000002812 |
| CID000002818 | CID000002895 | CID000002907 | CID000002909 | CID000002913 |
| CID000002949 | CID000002958 | CID000002973 | CID000002995 | CID000003009 |
| CID000003015 | CID000003032 | CID000003040 | CID000003059 | CID000003066 |
| CID000003075 | CID000003108 | CID000003114 | CID000003121 | CID000003125 |
| CID000003143 | CID000003148 | CID000003151 | CID000003152 | CID000003154 |
| CID000003157 | CID000003158 | CID000003222 | CID000003251 | CID000003261 |
| CID000003285 | CID000003308 | CID000003325 | CID000003333 | CID000003339 |
| CID000003345 | CID000003350 | CID000003355 | CID000003365 | CID000003367 |
| CID000003372 | CID000003379 | CID000003381 | CID000003385 | CID000003386 |
| CID000003394 | CID000003397 | CID000003403 | CID000003404 | CID000003410 |
| CID000003414 | CID000003419 | CID000003446 | CID000003449 | CID000003454 |
| CID000003461 | CID000003463 | CID000003467 | CID000003475 | CID000003478 |
| CID000003494 | CID000003510 | CID000003518 | CID000003519 | CID000003637 |
| CID000003648 | CID000003652 | CID000003657 | CID000003672 | CID000003675 |
| CID000003676 | CID000003696 | CID000003715 | CID000003724 | CID000003734 |
| CID000003736 | CID000003737 | CID000003741 | CID000003742 | CID000003746 |
| CID000003749 | CID000003750 | CID000003784 | CID000003793 | CID000003825 |
| CID000003826 | CID000003869 | CID000003878 | CID000003883 | CID000003890 |
| CID000003902 | CID000003911 | CID000003915 | CID000003929 | CID000003937 |
| CID000003948 | CID000003958 | CID000003961 | CID000003964 | CID000003998 |
| CID000004011 | CID000004036 | CID000004044 | CID000004046 | CID000004053 |
| CID000004060 | CID000004062 | CID000004075 | CID000004078 | CID000004086 |
| CID000004091 | CID000004095 | CID000004114 | CID000004138 | CID000004158 |
| CID000004163 | CID000004168 | CID000004171 | CID000004173 | CID000004178 |
| CID000004189 | CID000004201 | CID000004205 | CID000004212 | CID000004236 |
| CID000004253 | CID000004259 | CID000004409 | CID000004419 | CID000004428 |
| CID000004440 | CID000004449 | CID000004451 | CID000004463 | CID000004473 |
| CID000004485 | CID000004493 | CID000004497 | CID000004513 | CID000004536 |
| CID000004539 | CID000004542 | CID000004543 | CID000004547 | CID000004583 |
| CID000004585 | CID000004594 | CID000004595 | CID000004603 | CID000004607 |
| CID000004609 | CID000004614 | CID000004616 | CID000004634 | CID000004635 |
| CID000004638 | CID000004666 | CID000004679 | CID000004691 | CID000004725 |
| CID000004730 | CID000004736 | CID000004739 | CID000004740 | CID000004745 |
| CID000004748 | CID000004775 | CID000004819 | CID000004828 | CID000004829 |

CID000004845 CID000004856 CID000004865 CID000004885 CID000004889  
CID000004893 CID000004913 CID000004914 CID000004915 CID000004917  
CID000004920 CID000004927 CID000004932 CID000004943 CID000004976  
CID000005002 CID000005005 CID000005029 CID000005038 CID000005039  
CID000005040 CID000005052 CID000005070 CID000005073 CID000005076  
CID000005077 CID000005078 CID000005095 CID000005152 CID000005195  
CID000005203 CID000005210 CID000005212 CID000005215 CID000005234  
CID000005253 CID000005291 CID000005300 CID000005320 CID000005344  
CID000005352 CID000005358 CID000005372 CID000005376 CID000005379  
CID000005381 CID000005394 CID000005396 CID000005401 CID000005408  
CID000005426 CID000005452 CID000005453 CID000005454 CID000005466  
CID000005478 CID000005486 CID000005487 CID000005504 CID000005508  
CID000005512 CID000005514 CID000005516 CID000005523 CID000005525  
CID000005530 CID000005533 CID000005538 CID000005566 CID000005584  
CID000005591 CID000005596 CID000005625 CID000005636 CID000005645  
CID000005647 CID000005650 CID000005656 CID000005665 CID000005717  
CID000005718 CID000005719 CID000005721 CID000005726 CID000005731  
CID000005732 CID000005734 CID000005735 CID000005746 CID000005978  
CID000006256 CID000006476 CID000006691 CID000008612 CID000009904  
CID000010631 CID000014888 CID000018140 CID000019090 CID000027400  
CID000027661 CID000027686 CID000027991 CID000031378 CID000031477  
CID000032797 CID000034312 CID000039507 CID000039860 CID000040976  
CID000041317 CID000041774 CID000042615 CID000044564 CID000047725  
CID000052421 CID000054454 CID000054547 CID000054786 CID000057469  
CID000059708 CID000059768 CID000060164 CID000060184 CID000060198  
CID000060613 CID000060714 CID000060787 CID000060795 CID000060843  
CID000060865 CID000060953 CID000062819 CID000062924 CID000062959  
CID000064147 CID000065999 CID000068740 CID000071158 CID000071273  
CID000071329 CID000071616 CID000072054 CID000072938 CID000077992  
CID000077993 CID000077999 CID000082146 CID000083786 CID000093860  
CID000096312 CID000104758 CID000104865 CID000110634 CID000110635  
CID000115237 CID000119182 CID000119607 CID000122316 CID000123631  
CID000124087 CID000125889 CID000130881 CID000147912 CID000148192  
CID000150610 CID000151165 CID000152945 CID000158440 CID000163742  
CID000170361 CID000176870 CID000197712 CID000213039 CID000216239  
CID000216326 CID000444013 CID000444033 CID000657298 CID001349907  
CID003002190 CID003062316 CID003081884 CID004183806 CID004659568  
CID004659569 CID005281104 CID005282044 CID005311027 CID005311297  
CID005329102 CID005353980 CID005362420 CID005381226 CID005487301  
CID005493381 CID005493444 CID006398970 CID006435110 CID006447131  
CID009571074

(11)  $S_{11}$  : 448 drug compounds having side effect “Abdominal pain”

CID000000158 CID000000159 CID000000206 CID000000214 CID000000444

|             |             |              |             |             |
|-------------|-------------|--------------|-------------|-------------|
| CID00000450 | CID00000564 | CID00000596  | CID00000598 | CID00000738 |
| CID00000767 | CID00000853 | CID00000942  | CID00001003 | CID00001065 |
| CID00001125 | CID00001134 | CID000011546 | CID00001690 | CID00001935 |
| CID00001971 | CID00001972 | CID00001978  | CID00002022 | CID00002082 |
| CID00002083 | CID00002092 | CID00002118  | CID00002153 | CID00002156 |
| CID00002162 | CID00002170 | CID00002177  | CID00002179 | CID00002182 |
| CID00002187 | CID00002216 | CID00002232  | CID00002250 | CID00002265 |
| CID00002267 | CID00002269 | CID00002284  | CID00002311 | CID00002349 |
| CID00002375 | CID00002405 | CID00002431  | CID00002462 | CID00002471 |
| CID00002478 | CID00002487 | CID00002512  | CID00002524 | CID00002541 |
| CID00002550 | CID00002554 | CID00002578  | CID00002585 | CID00002609 |
| CID00002610 | CID00002617 | CID00002622  | CID00002631 | CID00002637 |
| CID00002646 | CID00002650 | CID00002654  | CID00002656 | CID00002658 |
| CID00002662 | CID00002666 | CID00002675  | CID00002676 | CID00002678 |
| CID00002708 | CID00002751 | CID00002762  | CID00002764 | CID00002769 |
| CID00002771 | CID00002786 | CID00002801  | CID00002802 | CID00002803 |
| CID00002806 | CID00002895 | CID00002909  | CID00002951 | CID00002955 |
| CID00002958 | CID00002973 | CID00002978  | CID00003007 | CID00003015 |
| CID00003016 | CID00003032 | CID00003040  | CID00003042 | CID00003043 |
| CID00003062 | CID00003066 | CID00003080  | CID00003108 | CID00003121 |
| CID00003125 | CID00003143 | CID00003148  | CID00003152 | CID00003154 |
| CID00003157 | CID00003161 | CID00003203  | CID00003222 | CID00003255 |
| CID00003261 | CID00003279 | CID00003285  | CID00003291 | CID00003308 |
| CID00003310 | CID00003324 | CID00003333  | CID00003339 | CID00003340 |
| CID00003342 | CID00003345 | CID00003348  | CID00003355 | CID00003366 |
| CID00003379 | CID00003386 | CID00003394  | CID00003403 | CID00003404 |
| CID00003406 | CID00003410 | CID00003414  | CID00003417 | CID00003419 |
| CID00003440 | CID00003446 | CID00003449  | CID00003454 | CID00003475 |
| CID00003476 | CID00003478 | CID00003488  | CID00003510 | CID00003519 |
| CID00003648 | CID00003661 | CID00003672  | CID00003685 | CID00003698 |
| CID00003702 | CID00003706 | CID00003736  | CID00003746 | CID00003749 |
| CID00003750 | CID00003793 | CID00003823  | CID00003825 | CID00003826 |
| CID00003827 | CID00003869 | CID00003877  | CID00003878 | CID00003883 |
| CID00003899 | CID00003902 | CID00003911  | CID00003929 | CID00003937 |
| CID00003948 | CID00003954 | CID00003956  | CID00003957 | CID00003961 |
| CID00003962 | CID00004030 | CID00004036  | CID00004044 | CID00004046 |
| CID00004075 | CID00004091 | CID00004095  | CID00004158 | CID00004163 |
| CID00004170 | CID00004171 | CID00004173  | CID00004178 | CID00004189 |
| CID00004195 | CID00004196 | CID00004200  | CID00004205 | CID00004212 |
| CID00004236 | CID00004253 | CID00004259  | CID00004264 | CID00004409 |
| CID00004419 | CID00004421 | CID00004428  | CID00004449 | CID00004451 |
| CID00004463 | CID00004485 | CID00004493  | CID00004509 | CID00004510 |
| CID00004513 | CID00004539 | CID00004542  | CID00004583 | CID00004585 |
| CID00004594 | CID00004595 | CID00004599  | CID00004603 | CID00004607 |

|              |              |              |              |              |
|--------------|--------------|--------------|--------------|--------------|
| CID000004609 | CID000004614 | CID000004634 | CID000004635 | CID000004666 |
| CID000004679 | CID000004691 | CID000004739 | CID000004740 | CID000004745 |
| CID000004775 | CID000004819 | CID000004828 | CID000004845 | CID000004856 |
| CID000004873 | CID000004885 | CID000004889 | CID000004891 | CID000004893 |
| CID000004913 | CID000004915 | CID000004920 | CID000004932 | CID000004946 |
| CID000004991 | CID000005002 | CID000005005 | CID000005029 | CID000005035 |
| CID000005038 | CID000005040 | CID000005064 | CID000005070 | CID000005071 |
| CID000005073 | CID000005076 | CID000005077 | CID000005078 | CID000005090 |
| CID000005095 | CID000005152 | CID000005155 | CID000005195 | CID000005203 |
| CID000005210 | CID000005212 | CID000005215 | CID000005245 | CID000005253 |
| CID000005291 | CID000005344 | CID000005372 | CID000005376 | CID000005379 |
| CID000005394 | CID000005396 | CID000005401 | CID000005402 | CID000005404 |
| CID000005408 | CID000005426 | CID000005430 | CID000005453 | CID000005466 |
| CID000005479 | CID000005496 | CID000005508 | CID000005512 | CID000005514 |
| CID000005515 | CID000005523 | CID000005525 | CID000005530 | CID000005538 |
| CID000005544 | CID000005591 | CID000005625 | CID000005645 | CID000005647 |
| CID000005650 | CID000005656 | CID000005665 | CID000005672 | CID000005717 |
| CID000005718 | CID000005719 | CID000005721 | CID000005726 | CID000005731 |
| CID000005732 | CID000005734 | CID000005735 | CID000005978 | CID000006058 |
| CID000006476 | CID000006691 | CID000009034 | CID000009433 | CID000010100 |
| CID000010631 | CID000013342 | CID000014888 | CID000019090 | CID000027661 |
| CID000027991 | CID000028112 | CID000030623 | CID000034312 | CID000038904 |
| CID000039042 | CID000039860 | CID000040159 | CID000040976 | CID000041317 |
| CID000041744 | CID000041774 | CID000042615 | CID000050294 | CID000050614 |
| CID000051577 | CID000051634 | CID000054454 | CID000054547 | CID000054688 |
| CID000054786 | CID000056959 | CID000057469 | CID000057537 | CID000059708 |
| CID000060184 | CID000060198 | CID000060612 | CID000060613 | CID000060754 |
| CID000060787 | CID000060795 | CID000060843 | CID000060852 | CID000060865 |
| CID000060871 | CID000060877 | CID000060953 | CID000062816 | CID000062819 |
| CID000062924 | CID000062959 | CID000064147 | CID000065027 | CID000065999 |
| CID000068740 | CID000071158 | CID000071273 | CID000071301 | CID000071329 |
| CID000071616 | CID000072054 | CID000072938 | CID000074989 | CID000077992 |
| CID000077999 | CID000082146 | CID000093860 | CID000096312 | CID000104741 |
| CID000104758 | CID000104865 | CID000110634 | CID000110635 | CID000115237 |
| CID000119182 | CID000119607 | CID000122316 | CID000123620 | CID000123631 |
| CID000125889 | CID000130881 | CID000147912 | CID000148192 | CID000148211 |
| CID000150310 | CID000150311 | CID000150610 | CID000151165 | CID000158440 |
| CID000160051 | CID000163742 | CID000170361 | CID000176168 | CID000176870 |
| CID000197712 | CID000213039 | CID000216239 | CID000216326 | CID000443871 |
| CID000477468 | CID002761171 | CID003002190 | CID003062316 | CID003081884 |
| CID003086672 | CID004183806 | CID004659568 | CID004659569 | CID005229711 |
| CID005281104 | CID005282044 | CID005311297 | CID005329102 | CID005353980 |
| CID005361912 | CID005362070 | CID005481350 | CID005487301 | CID005493381 |
| CID005493444 | CID006398970 | CID006435110 | CID006436173 | CID006447131 |

CID006918453 CID009571074 CID011947681

(12)  $S_{12}$  : 447 drug compounds having side effect "Somnolence"

CID000000159 CID000000191 CID000000206 CID000000401 CID000000444  
CID000000450 CID000000596 CID000000598 CID000000767 CID000000807  
CID000000937 CID000000942 CID000001148 CID000001690 CID000001775  
CID000001935 CID000001972 CID000001978 CID000001986 CID000002022  
CID000002083 CID000002118 CID000002130 CID000002140 CID000002141  
CID000002145 CID000002160 CID000002162 CID000002170 CID000002182  
CID000002187 CID000002215 CID000002216 CID000002244 CID000002249  
CID000002250 CID000002267 CID000002269 CID000002284 CID000002311  
CID000002349 CID000002366 CID000002375 CID000002381 CID000002405  
CID000002435 CID000002441 CID000002443 CID000002462 CID000002474  
CID000002476 CID000002477 CID000002478 CID000002487 CID000002512  
CID000002520 CID000002524 CID000002541 CID000002550 CID000002554  
CID000002564 CID000002576 CID000002578 CID000002585 CID000002609  
CID000002610 CID000002646 CID000002654 CID000002658 CID000002662  
CID000002676 CID000002678 CID000002712 CID000002725 CID000002726  
CID000002733 CID000002751 CID000002756 CID000002762 CID000002764  
CID000002769 CID000002771 CID000002781 CID000002794 CID000002801  
CID000002802 CID000002803 CID000002818 CID000002895 CID000002905  
CID000002909 CID000002913 CID000002951 CID000002958 CID000002978  
CID000002995 CID000003007 CID000003016 CID000003019 CID000003032  
CID000003042 CID000003059 CID000003066 CID000003075 CID000003100  
CID000003108 CID000003114 CID000003117 CID000003121 CID000003148  
CID000003152 CID000003154 CID000003157 CID000003158 CID000003168  
CID000003203 CID000003222 CID000003261 CID000003285 CID000003291  
CID000003308 CID000003310 CID000003324 CID000003325 CID000003333  
CID000003339 CID000003342 CID000003345 CID000003348 CID000003350  
CID000003354 CID000003355 CID000003365 CID000003372 CID000003373  
CID000003385 CID000003386 CID000003393 CID000003394 CID000003397  
CID000003404 CID000003406 CID000003410 CID000003414 CID000003417  
CID000003419 CID000003440 CID000003446 CID000003449 CID000003454  
CID000003461 CID000003463 CID000003475 CID000003478 CID000003494  
CID000003510 CID000003519 CID000003559 CID000003648 CID000003657  
CID000003658 CID000003661 CID000003672 CID000003675 CID000003676  
CID000003690 CID000003696 CID000003702 CID000003706 CID000003715  
CID000003724 CID000003730 CID000003736 CID000003741 CID000003746  
CID000003749 CID000003750 CID000003759 CID000003784 CID000003793  
CID000003823 CID000003825 CID000003826 CID000003869 CID000003883  
CID000003902 CID000003911 CID000003915 CID000003929 CID000003937  
CID000003948 CID000003954 CID000003956 CID000003957 CID000003961  
CID000003964 CID000004011 CID000004034 CID000004044 CID000004046  
CID000004054 CID000004057 CID000004060 CID000004062 CID000004064

|              |              |              |              |              |
|--------------|--------------|--------------|--------------|--------------|
| CID000004075 | CID000004078 | CID000004086 | CID000004100 | CID000004107 |
| CID000004112 | CID000004158 | CID000004163 | CID000004168 | CID000004170 |
| CID000004171 | CID000004173 | CID000004178 | CID000004192 | CID000004195 |
| CID000004200 | CID000004211 | CID000004212 | CID000004253 | CID000004259 |
| CID000004409 | CID000004419 | CID000004421 | CID000004428 | CID000004436 |
| CID000004440 | CID000004449 | CID000004451 | CID000004463 | CID000004473 |
| CID000004485 | CID000004493 | CID000004506 | CID000004509 | CID000004513 |
| CID000004539 | CID000004542 | CID000004543 | CID000004583 | CID000004585 |
| CID000004594 | CID000004595 | CID000004601 | CID000004609 | CID000004614 |
| CID000004616 | CID000004635 | CID000004679 | CID000004691 | CID000004723 |
| CID000004737 | CID000004739 | CID000004740 | CID000004745 | CID000004748 |
| CID000004768 | CID000004775 | CID000004819 | CID000004828 | CID000004845 |
| CID000004856 | CID000004885 | CID000004891 | CID000004893 | CID000004909 |
| CID000004914 | CID000004915 | CID000004917 | CID000004920 | CID000004927 |
| CID000004932 | CID000004934 | CID000004943 | CID000004946 | CID000004976 |
| CID000004991 | CID000005002 | CID000005005 | CID000005029 | CID000005038 |
| CID000005039 | CID000005040 | CID000005052 | CID000005070 | CID000005071 |
| CID000005073 | CID000005076 | CID000005077 | CID000005078 | CID000005090 |
| CID000005095 | CID000005155 | CID000005193 | CID000005195 | CID000005203 |
| CID000005206 | CID000005210 | CID000005212 | CID000005267 | CID000005291 |
| CID000005344 | CID000005352 | CID000005358 | CID000005372 | CID000005379 |
| CID000005391 | CID000005394 | CID000005401 | CID000005403 | CID000005419 |
| CID000005430 | CID000005452 | CID000005453 | CID000005454 | CID000005466 |
| CID000005478 | CID000005479 | CID000005487 | CID000005508 | CID000005512 |
| CID000005514 | CID000005523 | CID000005525 | CID000005530 | CID000005533 |
| CID000005538 | CID000005556 | CID000005566 | CID000005572 | CID000005584 |
| CID000005625 | CID000005645 | CID000005650 | CID000005656 | CID000005665 |
| CID000005718 | CID000005719 | CID000005726 | CID000005731 | CID000005732 |
| CID000005734 | CID000005735 | CID000005746 | CID000006058 | CID000006476 |
| CID000007029 | CID000008612 | CID000010100 | CID000010631 | CID000012555 |
| CID000014888 | CID000016362 | CID000023897 | CID000027400 | CID000027661 |
| CID000027686 | CID000027991 | CID000028112 | CID000031477 | CID000034312 |
| CID000039860 | CID000040976 | CID000041317 | CID000041693 | CID000042615 |
| CID000044564 | CID000051263 | CID000054547 | CID000054688 | CID000057537 |
| CID000059708 | CID000059768 | CID000060184 | CID000060612 | CID000060613 |
| CID000060754 | CID000060787 | CID000060795 | CID000060865 | CID000060877 |
| CID000062816 | CID000062867 | CID000062959 | CID000064147 | CID000065027 |
| CID000065999 | CID000068740 | CID000071158 | CID000071273 | CID000071301 |
| CID000071616 | CID000072054 | CID000072938 | CID000077992 | CID000077993 |
| CID000083786 | CID000096312 | CID000104865 | CID000110634 | CID000110635 |
| CID000115237 | CID000119182 | CID000119607 | CID000122316 | CID000123606 |
| CID000124087 | CID000125017 | CID000125889 | CID000147912 | CID000148192 |
| CID000148211 | CID000150610 | CID000151165 | CID000153941 | CID000158440 |
| CID000170361 | CID000213039 | CID000216326 | CID000444013 | CID000477468 |

|              |              |              |              |              |
|--------------|--------------|--------------|--------------|--------------|
| CID000657298 | CID001349907 | CID002761171 | CID003002190 | CID003062316 |
| CID003081884 | CID004183806 | CID004659568 | CID004659569 | CID005229711 |
| CID005281104 | CID005282044 | CID005311027 | CID005311297 | CID005353894 |
| CID005353980 | CID005381226 | CID005481350 | CID006398525 | CID006398970 |
| CID006435110 | CID009571074 |              |              |              |

(13)  $S_{13}$ : 431 drug compounds having side effect "Pain"

|              |              |              |              |              |
|--------------|--------------|--------------|--------------|--------------|
| CID000000085 | CID000000119 | CID000000137 | CID000000158 | CID000000159 |
| CID000000175 | CID000000191 | CID000000206 | CID000000214 | CID000000444 |
| CID000000450 | CID000000453 | CID000000564 | CID000000581 | CID000000596 |
| CID000000598 | CID000000727 | CID000000738 | CID000000750 | CID000000772 |
| CID000000807 | CID000000815 | CID000000937 | CID000000942 | CID000000951 |
| CID000001065 | CID000001125 | CID000001134 | CID000001546 | CID000001775 |
| CID000001971 | CID000001972 | CID000001978 | CID000001986 | CID000002082 |
| CID000002083 | CID000002092 | CID000002099 | CID000002118 | CID000002156 |
| CID000002162 | CID000002177 | CID000002179 | CID000002182 | CID000002187 |
| CID000002216 | CID000002232 | CID000002250 | CID000002267 | CID000002269 |
| CID000002274 | CID000002308 | CID000002349 | CID000002369 | CID000002375 |
| CID000002405 | CID000002435 | CID000002462 | CID000002471 | CID000002478 |
| CID000002512 | CID000002520 | CID000002524 | CID000002541 | CID000002578 |
| CID000002585 | CID000002609 | CID000002617 | CID000002622 | CID000002629 |
| CID000002631 | CID000002646 | CID000002650 | CID000002655 | CID000002656 |
| CID000002658 | CID000002678 | CID000002708 | CID000002713 | CID000002749 |
| CID000002751 | CID000002762 | CID000002764 | CID000002769 | CID000002771 |
| CID000002786 | CID000002794 | CID000002801 | CID000002802 | CID000002806 |
| CID000002818 | CID000002907 | CID000002909 | CID000002958 | CID000002973 |
| CID000003015 | CID000003016 | CID000003019 | CID000003043 | CID000003075 |
| CID000003080 | CID000003108 | CID000003114 | CID000003121 | CID000003143 |
| CID000003148 | CID000003152 | CID000003154 | CID000003157 | CID000003161 |
| CID000003203 | CID000003251 | CID000003255 | CID000003261 | CID000003278 |
| CID000003310 | CID000003325 | CID000003339 | CID000003348 | CID000003350 |
| CID000003355 | CID000003367 | CID000003373 | CID000003379 | CID000003381 |
| CID000003385 | CID000003386 | CID000003393 | CID000003403 | CID000003404 |
| CID000003406 | CID000003410 | CID000003414 | CID000003417 | CID000003419 |
| CID000003440 | CID000003449 | CID000003454 | CID000003461 | CID000003463 |
| CID000003467 | CID000003475 | CID000003476 | CID000003478 | CID000003494 |
| CID000003510 | CID000003640 | CID000003657 | CID000003658 | CID000003661 |
| CID000003702 | CID000003724 | CID000003730 | CID000003734 | CID000003736 |
| CID000003737 | CID000003741 | CID000003742 | CID000003746 | CID000003750 |
| CID000003784 | CID000003793 | CID000003823 | CID000003877 | CID000003878 |
| CID000003883 | CID000003890 | CID000003899 | CID000003902 | CID000003928 |
| CID000003929 | CID000003937 | CID000003948 | CID000003956 | CID000003958 |
| CID000003961 | CID000003962 | CID000003998 | CID000004046 | CID000004053 |
| CID000004054 | CID000004075 | CID000004086 | CID000004107 | CID000004112 |



|              |              |              |              |              |
|--------------|--------------|--------------|--------------|--------------|
| CID000004158 | CID000004163 | CID000004170 | CID000004171 | CID000004173 |
| CID000004174 | CID000004178 | CID000004192 | CID000004195 | CID000004200 |
| CID000004201 | CID000004205 | CID000004236 | CID000004259 | CID000004264 |
| CID000004428 | CID000004440 | CID000004449 | CID000004451 | CID000004473 |
| CID000004493 | CID000004513 | CID000004536 | CID000004542 | CID000004583 |
| CID000004585 | CID000004594 | CID000004595 | CID000004599 | CID000004609 |
| CID000004623 | CID000004634 | CID000004666 | CID000004679 | CID000004691 |
| CID000004724 | CID000004725 | CID000004727 | CID000004739 | CID000004745 |
| CID000004812 | CID000004819 | CID000004834 | CID000004856 | CID000004865 |
| CID000004873 | CID000004885 | CID000004889 | CID000004893 | CID000004911 |
| CID000004913 | CID000004915 | CID000004920 | CID000004932 | CID000004943 |
| CID000004946 | CID000005002 | CID000005029 | CID000005040 | CID000005064 |
| CID000005070 | CID000005073 | CID000005076 | CID000005077 | CID000005078 |
| CID000005095 | CID000005152 | CID000005155 | CID000005195 | CID000005203 |
| CID000005206 | CID000005212 | CID000005234 | CID000005245 | CID000005253 |
| CID000005291 | CID000005300 | CID000005352 | CID000005358 | CID000005359 |
| CID000005372 | CID000005376 | CID000005394 | CID000005401 | CID000005402 |
| CID000005403 | CID000005404 | CID000005408 | CID000005430 | CID000005453 |
| CID000005466 | CID000005472 | CID000005478 | CID000005486 | CID000005487 |
| CID000005496 | CID000005512 | CID000005514 | CID000005515 | CID000005525 |
| CID000005538 | CID000005544 | CID000005556 | CID000005596 | CID000005625 |
| CID000005636 | CID000005645 | CID000005647 | CID000005651 | CID000005656 |
| CID000005665 | CID000005672 | CID000005717 | CID000005718 | CID000005719 |
| CID000005721 | CID000005726 | CID000005731 | CID000005732 | CID000005734 |
| CID000005735 | CID000005746 | CID000005775 | CID000005978 | CID000006049 |
| CID000006691 | CID000007029 | CID000009034 | CID000009433 | CID000012536 |
| CID000013342 | CID000014888 | CID000016850 | CID000019090 | CID000025419 |
| CID000025517 | CID000027661 | CID000027686 | CID000027991 | CID000030623 |
| CID000032797 | CID000032800 | CID000034312 | CID000036339 | CID000036811 |
| CID000038904 | CID000039042 | CID000039860 | CID000040976 | CID000041317 |
| CID000041744 | CID000042615 | CID000051263 | CID000051634 | CID000052421 |
| CID000054547 | CID000054688 | CID000054786 | CID000057469 | CID000059708 |
| CID000059768 | CID000060164 | CID000060184 | CID000060198 | CID000060612 |
| CID000060613 | CID000060714 | CID000060754 | CID000060787 | CID000060795 |
| CID000060843 | CID000060865 | CID000060953 | CID000062819 | CID000062959 |
| CID000064147 | CID000065027 | CID000065999 | CID000068740 | CID000071158 |
| CID000071329 | CID000071616 | CID000072054 | CID000072938 | CID000074989 |
| CID000077992 | CID000077993 | CID000077999 | CID000082146 | CID000083786 |
| CID000093860 | CID000096312 | CID000104741 | CID000104758 | CID000104865 |
| CID000110634 | CID000110635 | CID000115237 | CID000119182 | CID000119607 |
| CID000123606 | CID000123620 | CID000123631 | CID000130881 | CID000147912 |
| CID000148192 | CID000148211 | CID000150610 | CID000151165 | CID000158440 |
| CID000160051 | CID000163742 | CID000170361 | CID000176870 | CID000216239 |
| CID000216326 | CID000444013 | CID000444033 | CID000450096 | CID000477468 |

|              |              |              |              |              |
|--------------|--------------|--------------|--------------|--------------|
| CID003002190 | CID003062316 | CID003081884 | CID003086672 | CID004479097 |
| CID004659568 | CID004659569 | CID005229711 | CID005281007 | CID005281104 |
| CID005282044 | CID005282226 | CID005311027 | CID005311297 | CID005329102 |
| CID005353894 | CID005361912 | CID005362070 | CID005362420 | CID005481350 |
| CID005487301 | CID005493381 | CID005493444 | CID006323497 | CID006436173 |
| CID009571074 |              |              |              |              |

(14)  $S_{14}$  : 431 drug compounds having side effect “Constipation”

|              |              |              |              |              |
|--------------|--------------|--------------|--------------|--------------|
| CID000000085 | CID000000143 | CID000000159 | CID000000271 | CID000000444 |
| CID000000450 | CID000000596 | CID000000598 | CID000000738 | CID000000807 |
| CID000000942 | CID000001206 | CID000001546 | CID000001690 | CID000001775 |
| CID000001935 | CID000001972 | CID000001978 | CID000002022 | CID000002083 |
| CID000002092 | CID000002099 | CID000002118 | CID000002130 | CID000002156 |
| CID000002160 | CID000002162 | CID000002170 | CID000002182 | CID000002187 |
| CID000002215 | CID000002216 | CID000002249 | CID000002250 | CID000002267 |
| CID000002269 | CID000002284 | CID000002311 | CID000002315 | CID000002344 |
| CID000002369 | CID000002375 | CID000002381 | CID000002405 | CID000002443 |
| CID000002476 | CID000002477 | CID000002478 | CID000002487 | CID000002512 |
| CID000002520 | CID000002524 | CID000002541 | CID000002550 | CID000002554 |
| CID000002564 | CID000002578 | CID000002609 | CID000002622 | CID000002654 |
| CID000002662 | CID000002676 | CID000002678 | CID000002712 | CID000002720 |
| CID000002725 | CID000002726 | CID000002732 | CID000002751 | CID000002762 |
| CID000002764 | CID000002769 | CID000002771 | CID000002781 | CID000002786 |
| CID000002794 | CID000002800 | CID000002801 | CID000002802 | CID000002803 |
| CID000002806 | CID000002818 | CID000002895 | CID000002907 | CID000002909 |
| CID000002913 | CID000002949 | CID000002951 | CID000002958 | CID000002995 |
| CID000003007 | CID000003015 | CID000003016 | CID000003019 | CID000003032 |
| CID000003042 | CID000003059 | CID000003075 | CID000003100 | CID000003114 |
| CID000003121 | CID000003143 | CID000003148 | CID000003151 | CID000003152 |
| CID000003157 | CID000003158 | CID000003203 | CID000003222 | CID000003249 |
| CID000003261 | CID000003285 | CID000003308 | CID000003310 | CID000003324 |
| CID000003325 | CID000003333 | CID000003339 | CID000003340 | CID000003342 |
| CID000003345 | CID000003355 | CID000003365 | CID000003367 | CID000003372 |
| CID000003379 | CID000003386 | CID000003393 | CID000003394 | CID000003403 |
| CID000003404 | CID000003410 | CID000003414 | CID000003417 | CID000003419 |
| CID000003440 | CID000003446 | CID000003449 | CID000003454 | CID000003461 |
| CID000003463 | CID000003475 | CID000003478 | CID000003494 | CID000003510 |
| CID000003519 | CID000003559 | CID000003637 | CID000003639 | CID000003647 |
| CID000003648 | CID000003657 | CID000003661 | CID000003672 | CID000003675 |
| CID000003690 | CID000003696 | CID000003702 | CID000003715 | CID000003736 |
| CID000003746 | CID000003749 | CID000003750 | CID000003759 | CID000003784 |
| CID000003793 | CID000003825 | CID000003826 | CID000003869 | CID000003878 |
| CID000003883 | CID000003899 | CID000003902 | CID000003911 | CID000003929 |
| CID000003937 | CID000003948 | CID000003954 | CID000003958 | CID000003961 |

|              |              |              |              |              |
|--------------|--------------|--------------|--------------|--------------|
| CID000003962 | CID000003964 | CID000004011 | CID000004032 | CID000004036 |
| CID000004044 | CID000004054 | CID000004057 | CID000004058 | CID000004075 |
| CID000004078 | CID000004091 | CID000004095 | CID000004121 | CID000004138 |
| CID000004158 | CID000004163 | CID000004170 | CID000004171 | CID000004173 |
| CID000004178 | CID000004200 | CID000004205 | CID000004212 | CID000004236 |
| CID000004253 | CID000004259 | CID000004409 | CID000004411 | CID000004428 |
| CID000004440 | CID000004449 | CID000004473 | CID000004485 | CID000004493 |
| CID000004506 | CID000004509 | CID000004513 | CID000004539 | CID000004542 |
| CID000004543 | CID000004547 | CID000004583 | CID000004585 | CID000004594 |
| CID000004595 | CID000004601 | CID000004609 | CID000004614 | CID000004635 |
| CID000004666 | CID000004679 | CID000004691 | CID000004736 | CID000004737 |
| CID000004739 | CID000004740 | CID000004745 | CID000004748 | CID000004771 |
| CID000004775 | CID000004819 | CID000004828 | CID000004856 | CID000004870 |
| CID000004885 | CID000004889 | CID000004893 | CID000004915 | CID000004917 |
| CID000004919 | CID000004920 | CID000004932 | CID000004934 | CID000004946 |
| CID000004976 | CID000005002 | CID000005005 | CID000005029 | CID000005038 |
| CID000005039 | CID000005040 | CID000005064 | CID000005070 | CID000005071 |
| CID000005073 | CID000005076 | CID000005077 | CID000005078 | CID000005090 |
| CID000005095 | CID000005152 | CID000005155 | CID000005193 | CID000005195 |
| CID000005203 | CID000005210 | CID000005212 | CID000005245 | CID000005291 |
| CID000005352 | CID000005358 | CID000005372 | CID000005376 | CID000005379 |
| CID000005394 | CID000005401 | CID000005426 | CID000005452 | CID000005454 |
| CID000005466 | CID000005479 | CID000005487 | CID000005508 | CID000005512 |
| CID000005514 | CID000005515 | CID000005516 | CID000005523 | CID000005525 |
| CID000005530 | CID000005533 | CID000005538 | CID000005556 | CID000005566 |
| CID000005572 | CID000005584 | CID000005596 | CID000005625 | CID000005645 |
| CID000005647 | CID000005650 | CID000005656 | CID000005665 | CID000005672 |
| CID000005718 | CID000005719 | CID000005726 | CID000005731 | CID000005732 |
| CID000005734 | CID000005735 | CID000005978 | CID000006058 | CID000006476 |
| CID000007029 | CID000010100 | CID000010631 | CID000013342 | CID000014888 |
| CID000016362 | CID000019090 | CID000023897 | CID000027661 | CID000027686 |
| CID000027991 | CID000030623 | CID000034312 | CID000038904 | CID000039042 |
| CID000039860 | CID000040976 | CID000041317 | CID000041781 | CID000042615 |
| CID000047725 | CID000051634 | CID000054454 | CID000054547 | CID000054688 |
| CID000056959 | CID000057537 | CID000059708 | CID000059768 | CID000060184 |
| CID000060198 | CID000060613 | CID000060753 | CID000060787 | CID000060795 |
| CID000060843 | CID000060852 | CID000060953 | CID000062816 | CID000062819 |
| CID000062867 | CID000062959 | CID000064147 | CID000065027 | CID000065999 |
| CID000068740 | CID000071158 | CID000071273 | CID000071616 | CID000072054 |
| CID000072938 | CID000074989 | CID000077992 | CID000077993 | CID000077999 |
| CID000082146 | CID000093860 | CID000096312 | CID000104741 | CID000104758 |
| CID000104865 | CID000115237 | CID000119182 | CID000119607 | CID000122316 |
| CID000123631 | CID000125017 | CID000125889 | CID000147912 | CID000148192 |
| CID000148211 | CID000150610 | CID000151165 | CID000158440 | CID000160051 |

|              |              |              |              |              |
|--------------|--------------|--------------|--------------|--------------|
| CID000163742 | CID000166548 | CID000170361 | CID000176168 | CID000176870 |
| CID000197712 | CID000213039 | CID000216239 | CID000216326 | CID000444013 |
| CID000477468 | CID003002190 | CID003062316 | CID003081884 | CID004183806 |
| CID004659568 | CID004659569 | CID005281104 | CID005282044 | CID005329102 |
| CID005362070 | CID005362420 | CID005493444 | CID006323497 | CID006398525 |
| CID006398970 | CID006435110 | CID006436173 | CID006447131 | CID006918453 |
| CID009571074 |              |              |              |              |

(15)  $S_{15}$  : 409 drug compounds having side effect “Dyspnea”

|              |              |              |              |              |
|--------------|--------------|--------------|--------------|--------------|
| CID000000085 | CID000000158 | CID000000159 | CID000000191 | CID000000444 |
| CID000000564 | CID000000581 | CID000000596 | CID000000598 | CID000000681 |
| CID000000772 | CID000000807 | CID000000853 | CID000000937 | CID000000942 |
| CID000001003 | CID000001065 | CID000001546 | CID000001690 | CID000001775 |
| CID000001935 | CID000001971 | CID000001972 | CID000001978 | CID000002022 |
| CID000002083 | CID000002130 | CID000002140 | CID000002141 | CID000002156 |
| CID000002162 | CID000002179 | CID000002182 | CID000002187 | CID000002215 |
| CID000002216 | CID000002232 | CID000002249 | CID000002250 | CID000002267 |
| CID000002269 | CID000002274 | CID000002284 | CID000002311 | CID000002349 |
| CID000002369 | CID000002375 | CID000002405 | CID000002435 | CID000002462 |
| CID000002476 | CID000002478 | CID000002487 | CID000002512 | CID000002519 |
| CID000002520 | CID000002541 | CID000002550 | CID000002554 | CID000002578 |
| CID000002583 | CID000002585 | CID000002609 | CID000002622 | CID000002637 |
| CID000002654 | CID000002662 | CID000002676 | CID000002678 | CID000002708 |
| CID000002726 | CID000002751 | CID000002764 | CID000002771 | CID000002801 |
| CID000002802 | CID000002803 | CID000002806 | CID000002818 | CID000002891 |
| CID000002895 | CID000002907 | CID000002909 | CID000002958 | CID000002973 |
| CID000003007 | CID000003015 | CID000003016 | CID000003019 | CID000003032 |
| CID000003042 | CID000003059 | CID000003066 | CID000003075 | CID000003108 |
| CID000003114 | CID000003121 | CID000003143 | CID000003148 | CID000003152 |
| CID000003154 | CID000003156 | CID000003157 | CID000003203 | CID000003222 |
| CID000003261 | CID000003285 | CID000003308 | CID000003310 | CID000003333 |
| CID000003339 | CID000003340 | CID000003342 | CID000003345 | CID000003348 |
| CID000003350 | CID000003355 | CID000003366 | CID000003367 | CID000003372 |
| CID000003373 | CID000003379 | CID000003385 | CID000003386 | CID000003393 |
| CID000003394 | CID000003403 | CID000003404 | CID000003410 | CID000003414 |
| CID000003419 | CID000003446 | CID000003454 | CID000003461 | CID000003475 |
| CID000003476 | CID000003478 | CID000003488 | CID000003510 | CID000003518 |
| CID000003519 | CID000003559 | CID000003636 | CID000003637 | CID000003648 |
| CID000003657 | CID000003672 | CID000003676 | CID000003702 | CID000003706 |
| CID000003715 | CID000003724 | CID000003734 | CID000003736 | CID000003737 |
| CID000003741 | CID000003742 | CID000003746 | CID000003749 | CID000003750 |
| CID000003779 | CID000003784 | CID000003793 | CID000003825 | CID000003826 |
| CID000003869 | CID000003878 | CID000003883 | CID000003890 | CID000003899 |
| CID000003902 | CID000003911 | CID000003914 | CID000003915 | CID000003929 |

|              |              |              |              |              |
|--------------|--------------|--------------|--------------|--------------|
| CID000003937 | CID000003948 | CID000003961 | CID000003962 | CID000003964 |
| CID000004044 | CID000004046 | CID000004053 | CID000004054 | CID000004075 |
| CID000004091 | CID000004112 | CID000004140 | CID000004158 | CID000004163 |
| CID000004168 | CID000004171 | CID000004178 | CID000004192 | CID000004195 |
| CID000004200 | CID000004205 | CID000004212 | CID000004236 | CID000004253 |
| CID000004259 | CID000004409 | CID000004419 | CID000004425 | CID000004428 |
| CID000004440 | CID000004449 | CID000004451 | CID000004473 | CID000004485 |
| CID000004493 | CID000004497 | CID000004506 | CID000004509 | CID000004510 |
| CID000004539 | CID000004542 | CID000004583 | CID000004585 | CID000004594 |
| CID000004609 | CID000004614 | CID000004635 | CID000004679 | CID000004691 |
| CID000004724 | CID000004736 | CID000004739 | CID000004740 | CID000004745 |
| CID000004812 | CID000004819 | CID000004828 | CID000004829 | CID000004856 |
| CID000004885 | CID000004889 | CID000004893 | CID000004917 | CID000004920 |
| CID000004932 | CID000004943 | CID000004946 | CID000005002 | CID000005005 |
| CID000005029 | CID000005038 | CID000005040 | CID000005052 | CID000005064 |
| CID000005070 | CID000005071 | CID000005073 | CID000005076 | CID000005077 |
| CID000005078 | CID000005090 | CID000005095 | CID000005195 | CID000005203 |
| CID000005206 | CID000005210 | CID000005212 | CID000005234 | CID000005245 |
| CID000005253 | CID000005291 | CID000005352 | CID000005358 | CID000005372 |
| CID000005376 | CID000005379 | CID000005391 | CID000005394 | CID000005396 |
| CID000005401 | CID000005403 | CID000005408 | CID000005426 | CID000005454 |
| CID000005466 | CID000005478 | CID000005487 | CID000005496 | CID000005514 |
| CID000005515 | CID000005516 | CID000005523 | CID000005525 | CID000005538 |
| CID000005544 | CID000005566 | CID000005625 | CID000005645 | CID000005647 |
| CID000005650 | CID000005651 | CID000005656 | CID000005672 | CID000005718 |
| CID000005719 | CID000005721 | CID000005726 | CID000005731 | CID000005732 |
| CID000005734 | CID000005735 | CID000005746 | CID000007029 | CID000009034 |
| CID000010631 | CID000014888 | CID000018140 | CID000019090 | CID000023897 |
| CID000025419 | CID000027661 | CID000027686 | CID000030623 | CID000031477 |
| CID000034312 | CID000038904 | CID000039860 | CID000042113 | CID000047319 |
| CID000050294 | CID000054454 | CID000054547 | CID000054688 | CID000054786 |
| CID000056959 | CID000057469 | CID000059768 | CID000060184 | CID000060198 |
| CID000060612 | CID000060613 | CID000060714 | CID000060754 | CID000060787 |
| CID000060795 | CID000060843 | CID000060953 | CID000062924 | CID000062959 |
| CID000064147 | CID000065027 | CID000065999 | CID000068740 | CID000068844 |
| CID000071158 | CID000071273 | CID000071301 | CID000071329 | CID000071616 |
| CID000072938 | CID000074989 | CID000077992 | CID000077993 | CID000082146 |
| CID000093860 | CID000096312 | CID000104741 | CID000104865 | CID000110634 |
| CID000110635 | CID000115237 | CID000119182 | CID000119607 | CID000122316 |
| CID000123606 | CID000123631 | CID000124087 | CID000125889 | CID000147912 |
| CID000148192 | CID000148211 | CID000150610 | CID000151165 | CID000158440 |
| CID000166548 | CID000170361 | CID000176870 | CID000197712 | CID000213039 |
| CID000216239 | CID000216326 | CID000444013 | CID000444033 | CID000450096 |
| CID000477468 | CID003062316 | CID003081884 | CID004183806 | CID004659568 |

|              |              |              |              |              |
|--------------|--------------|--------------|--------------|--------------|
| CID004659569 | CID005229711 | CID005281104 | CID005282044 | CID005311027 |
| CID005311181 | CID005329102 | CID005353980 | CID005361912 | CID005362420 |
| CID005481350 | CID005487301 | CID006436173 | CID006447131 |              |

(16)  $S_{16}$ : 409 drug compounds having side effect "Anorexia"

|              |              |              |              |              |
|--------------|--------------|--------------|--------------|--------------|
| CID000000085 | CID000000143 | CID000000159 | CID000000271 | CID000000444 |
| CID000000596 | CID000000598 | CID000000767 | CID000000937 | CID000001046 |
| CID000001065 | CID000001148 | CID000001546 | CID000001690 | CID000001775 |
| CID000001935 | CID000001971 | CID000001972 | CID000001978 | CID000001986 |
| CID000002022 | CID000002083 | CID000002118 | CID000002130 | CID000002145 |
| CID000002156 | CID000002160 | CID000002162 | CID000002170 | CID000002179 |
| CID000002182 | CID000002187 | CID000002249 | CID000002250 | CID000002269 |
| CID000002284 | CID000002315 | CID000002344 | CID000002369 | CID000002375 |
| CID000002443 | CID000002462 | CID000002476 | CID000002477 | CID000002478 |
| CID000002487 | CID000002512 | CID000002524 | CID000002550 | CID000002554 |
| CID000002559 | CID000002564 | CID000002575 | CID000002578 | CID000002585 |
| CID000002609 | CID000002617 | CID000002654 | CID000002658 | CID000002662 |
| CID000002676 | CID000002678 | CID000002708 | CID000002719 | CID000002720 |
| CID000002725 | CID000002727 | CID000002732 | CID000002751 | CID000002762 |
| CID000002764 | CID000002771 | CID000002781 | CID000002794 | CID000002801 |
| CID000002802 | CID000002803 | CID000002818 | CID000002895 | CID000002907 |
| CID000002909 | CID000002913 | CID000002951 | CID000002958 | CID000002983 |
| CID000002995 | CID000003007 | CID000003009 | CID000003015 | CID000003016 |
| CID000003019 | CID000003032 | CID000003042 | CID000003043 | CID000003059 |
| CID000003062 | CID000003066 | CID000003075 | CID000003100 | CID000003114 |
| CID000003121 | CID000003143 | CID000003148 | CID000003152 | CID000003154 |
| CID000003157 | CID000003158 | CID000003203 | CID000003222 | CID000003249 |
| CID000003255 | CID000003278 | CID000003279 | CID000003291 | CID000003308 |
| CID000003310 | CID000003324 | CID000003325 | CID000003339 | CID000003342 |
| CID000003345 | CID000003355 | CID000003365 | CID000003366 | CID000003367 |
| CID000003372 | CID000003385 | CID000003386 | CID000003393 | CID000003394 |
| CID000003397 | CID000003403 | CID000003404 | CID000003405 | CID000003414 |
| CID000003417 | CID000003440 | CID000003446 | CID000003449 | CID000003454 |
| CID000003461 | CID000003476 | CID000003478 | CID000003559 | CID000003637 |
| CID000003639 | CID000003647 | CID000003648 | CID000003652 | CID000003657 |
| CID000003685 | CID000003690 | CID000003696 | CID000003698 | CID000003702 |
| CID000003706 | CID000003715 | CID000003734 | CID000003750 | CID000003767 |
| CID000003793 | CID000003821 | CID000003825 | CID000003826 | CID000003877 |
| CID000003878 | CID000003883 | CID000003899 | CID000003902 | CID000003911 |
| CID000003929 | CID000003937 | CID000003948 | CID000003956 | CID000003961 |
| CID000003962 | CID000004032 | CID000004033 | CID000004036 | CID000004046 |
| CID000004053 | CID000004054 | CID000004075 | CID000004078 | CID000004091 |
| CID000004095 | CID000004100 | CID000004112 | CID000004121 | CID000004158 |
| CID000004170 | CID000004173 | CID000004200 | CID000004205 | CID000004211 |

|              |              |              |              |              |
|--------------|--------------|--------------|--------------|--------------|
| CID000004212 | CID000004236 | CID000004253 | CID000004259 | CID000004409 |
| CID000004411 | CID000004428 | CID000004449 | CID000004451 | CID000004493 |
| CID000004509 | CID000004513 | CID000004539 | CID000004542 | CID000004543 |
| CID000004583 | CID000004585 | CID000004594 | CID000004609 | CID000004614 |
| CID000004634 | CID000004635 | CID000004645 | CID000004666 | CID000004679 |
| CID000004723 | CID000004727 | CID000004739 | CID000004740 | CID000004745 |
| CID000004748 | CID000004819 | CID000004845 | CID000004856 | CID000004870 |
| CID000004885 | CID000004889 | CID000004891 | CID000004909 | CID000004911 |
| CID000004913 | CID000004915 | CID000004920 | CID000004932 | CID000004946 |
| CID000004976 | CID000004993 | CID000005002 | CID000005005 | CID000005029 |
| CID000005038 | CID000005040 | CID000005052 | CID000005064 | CID000005070 |
| CID000005071 | CID000005073 | CID000005076 | CID000005077 | CID000005078 |
| CID000005095 | CID000005155 | CID000005195 | CID000005203 | CID000005210 |
| CID000005212 | CID000005215 | CID000005291 | CID000005344 | CID000005352 |
| CID000005372 | CID000005376 | CID000005379 | CID000005391 | CID000005394 |
| CID000005396 | CID000005401 | CID000005402 | CID000005412 | CID000005426 |
| CID000005430 | CID000005452 | CID000005453 | CID000005454 | CID000005466 |
| CID000005472 | CID000005478 | CID000005479 | CID000005496 | CID000005514 |
| CID000005515 | CID000005516 | CID000005523 | CID000005525 | CID000005530 |
| CID000005533 | CID000005538 | CID000005556 | CID000005566 | CID000005584 |
| CID000005591 | CID000005625 | CID000005645 | CID000005647 | CID000005650 |
| CID000005656 | CID000005672 | CID000005718 | CID000005719 | CID000005721 |
| CID000005726 | CID000005731 | CID000005732 | CID000005734 | CID000005735 |
| CID000005746 | CID000005978 | CID000006049 | CID000006058 | CID000006476 |
| CID000010631 | CID000013342 | CID000014888 | CID000018140 | CID000020585 |
| CID000027661 | CID000027991 | CID000028112 | CID000030623 | CID000034312 |
| CID000038904 | CID000039860 | CID000040976 | CID000041317 | CID000047725 |
| CID000051634 | CID000054454 | CID000054547 | CID000054688 | CID000054786 |
| CID000057537 | CID000059708 | CID000059768 | CID000060184 | CID000060198 |
| CID000060613 | CID000060754 | CID000060787 | CID000060795 | CID000060843 |
| CID000060953 | CID000062816 | CID000062867 | CID000062959 | CID000064147 |
| CID000065027 | CID000065999 | CID000068740 | CID000071158 | CID000071616 |
| CID000072938 | CID000074989 | CID000077992 | CID000077993 | CID000082146 |
| CID000083786 | CID000093860 | CID000096312 | CID000104741 | CID000104758 |
| CID000104865 | CID000119182 | CID000119607 | CID000122316 | CID000123620 |
| CID000123631 | CID000124087 | CID000125889 | CID000147912 | CID000148192 |
| CID000148211 | CID000150610 | CID000151165 | CID000170361 | CID000176870 |
| CID000197712 | CID000213039 | CID000216239 | CID000216326 | CID000444013 |
| CID000477468 | CID000667490 | CID002761171 | CID003002190 | CID003062316 |
| CID003081884 | CID004659568 | CID004659569 | CID005281007 | CID005281104 |
| CID005282044 | CID005329102 | CID005353980 | CID005361912 | CID005362070 |
| CID005381226 | CID005473385 | CID005481350 | CID006323497 | CID006398970 |
| CID006435110 | CID006436173 | CID006918453 | CID009571074 |              |

(17)  $S_{17}$ : 409 drug compounds having side effect "Insomnia"

|              |              |              |              |              |
|--------------|--------------|--------------|--------------|--------------|
| CID000000085 | CID000000159 | CID000000450 | CID000000596 | CID000000598 |
| CID000000738 | CID000000807 | CID000000853 | CID000000937 | CID000000942 |
| CID000001134 | CID000001206 | CID000001546 | CID000001690 | CID000001775 |
| CID000001935 | CID000001971 | CID000001972 | CID000001978 | CID000002021 |
| CID000002022 | CID000002083 | CID000002118 | CID000002130 | CID000002153 |
| CID000002156 | CID000002160 | CID000002162 | CID000002170 | CID000002171 |
| CID000002182 | CID000002187 | CID000002215 | CID000002216 | CID000002249 |
| CID000002250 | CID000002269 | CID000002274 | CID000002284 | CID000002311 |
| CID000002369 | CID000002375 | CID000002405 | CID000002435 | CID000002443 |
| CID000002462 | CID000002476 | CID000002478 | CID000002487 | CID000002512 |
| CID000002520 | CID000002524 | CID000002550 | CID000002554 | CID000002564 |
| CID000002576 | CID000002578 | CID000002583 | CID000002585 | CID000002609 |
| CID000002646 | CID000002654 | CID000002662 | CID000002676 | CID000002678 |
| CID000002725 | CID000002726 | CID000002751 | CID000002762 | CID000002764 |
| CID000002769 | CID000002781 | CID000002800 | CID000002801 | CID000002802 |
| CID000002803 | CID000002806 | CID000002818 | CID000002895 | CID000002909 |
| CID000002913 | CID000002951 | CID000002958 | CID000002995 | CID000003003 |
| CID000003007 | CID000003016 | CID000003032 | CID000003042 | CID000003059 |
| CID000003066 | CID000003075 | CID000003100 | CID000003114 | CID000003121 |
| CID000003125 | CID000003143 | CID000003151 | CID000003152 | CID000003154 |
| CID000003157 | CID000003161 | CID000003203 | CID000003222 | CID000003285 |
| CID000003292 | CID000003308 | CID000003325 | CID000003333 | CID000003339 |
| CID000003340 | CID000003342 | CID000003345 | CID000003348 | CID000003355 |
| CID000003365 | CID000003373 | CID000003379 | CID000003385 | CID000003394 |
| CID000003403 | CID000003404 | CID000003410 | CID000003414 | CID000003417 |
| CID000003419 | CID000003446 | CID000003449 | CID000003454 | CID000003461 |
| CID000003475 | CID000003476 | CID000003478 | CID000003494 | CID000003510 |
| CID000003512 | CID000003519 | CID000003559 | CID000003640 | CID000003648 |
| CID000003661 | CID000003672 | CID000003675 | CID000003696 | CID000003702 |
| CID000003715 | CID000003724 | CID000003736 | CID000003746 | CID000003750 |
| CID000003779 | CID000003784 | CID000003793 | CID000003821 | CID000003825 |
| CID000003826 | CID000003827 | CID000003877 | CID000003878 | CID000003883 |
| CID000003899 | CID000003902 | CID000003911 | CID000003929 | CID000003937 |
| CID000003948 | CID000003956 | CID000003958 | CID000003961 | CID000003962 |
| CID000003964 | CID000004011 | CID000004036 | CID000004044 | CID000004046 |
| CID000004054 | CID000004057 | CID000004060 | CID000004075 | CID000004086 |
| CID000004095 | CID000004107 | CID000004114 | CID000004158 | CID000004163 |
| CID000004168 | CID000004170 | CID000004171 | CID000004173 | CID000004192 |
| CID000004195 | CID000004196 | CID000004201 | CID000004236 | CID000004253 |
| CID000004259 | CID000004409 | CID000004428 | CID000004451 | CID000004473 |
| CID000004485 | CID000004493 | CID000004513 | CID000004536 | CID000004539 |
| CID000004542 | CID000004543 | CID000004583 | CID000004585 | CID000004594 |
| CID000004603 | CID000004609 | CID000004614 | CID000004635 | CID000004638 |



|              |              |              |              |              |
|--------------|--------------|--------------|--------------|--------------|
| CID000004679 | CID000004723 | CID000004724 | CID000004736 | CID000004739 |
| CID000004740 | CID000004745 | CID000004748 | CID000004771 | CID000004819 |
| CID000004828 | CID000004845 | CID000004856 | CID000004865 | CID000004885 |
| CID000004889 | CID000004893 | CID000004894 | CID000004915 | CID000004917 |
| CID000004920 | CID000004927 | CID000004932 | CID000004934 | CID000004943 |
| CID000004946 | CID000004976 | CID000005002 | CID000005005 | CID000005029 |
| CID000005035 | CID000005038 | CID000005039 | CID000005040 | CID000005064 |
| CID000005070 | CID000005071 | CID000005073 | CID000005076 | CID000005077 |
| CID000005078 | CID000005090 | CID000005095 | CID000005152 | CID000005155 |
| CID000005203 | CID000005206 | CID000005210 | CID000005212 | CID000005215 |
| CID000005245 | CID000005253 | CID000005291 | CID000005344 | CID000005352 |
| CID000005372 | CID000005376 | CID000005379 | CID000005394 | CID000005401 |
| CID000005408 | CID000005419 | CID000005426 | CID000005454 | CID000005466 |
| CID000005478 | CID000005479 | CID000005514 | CID000005523 | CID000005525 |
| CID000005530 | CID000005533 | CID000005538 | CID000005544 | CID000005566 |
| CID000005584 | CID000005625 | CID000005636 | CID000005645 | CID000005647 |
| CID000005650 | CID000005665 | CID000005717 | CID000005718 | CID000005726 |
| CID000005731 | CID000005734 | CID000005978 | CID000006476 | CID000007029 |
| CID000009433 | CID000009904 | CID000010631 | CID000014888 | CID000016362 |
| CID000018140 | CID000019090 | CID000020585 | CID000027661 | CID000027686 |
| CID000027991 | CID000030623 | CID000031378 | CID000034312 | CID000039042 |
| CID000039860 | CID000040976 | CID000041317 | CID000041781 | CID000042615 |
| CID000047725 | CID000054454 | CID000054547 | CID000054688 | CID000054786 |
| CID000057469 | CID000057537 | CID000059708 | CID000060198 | CID000060613 |
| CID000060753 | CID000060787 | CID000060795 | CID000060852 | CID000060877 |
| CID000060953 | CID000062816 | CID000062819 | CID000062867 | CID000062924 |
| CID000062959 | CID000064147 | CID000065027 | CID000065999 | CID000068740 |
| CID000071158 | CID000071273 | CID000071301 | CID000071329 | CID000071616 |
| CID000072054 | CID000072938 | CID000074989 | CID000077992 | CID000077993 |
| CID000082146 | CID000083786 | CID000093860 | CID000096312 | CID000104741 |
| CID000104865 | CID000110634 | CID000110635 | CID000115237 | CID000119607 |
| CID000123606 | CID000123620 | CID000124087 | CID000125889 | CID000130881 |
| CID000147912 | CID000148192 | CID000148211 | CID000150610 | CID000151165 |
| CID000153941 | CID000163742 | CID000170361 | CID000176870 | CID000197712 |
| CID000213039 | CID000216326 | CID000444013 | CID000477468 | CID003002190 |
| CID003062316 | CID003081884 | CID005281104 | CID005282044 | CID005311027 |
| CID005311181 | CID005311297 | CID005329102 | CID005353980 | CID005361912 |
| CID005362070 | CID005481350 | CID005487301 | CID005493381 | CID005493444 |
| CID006398525 | CID006398970 | CID006436173 | CID009571074 |              |

(18)  $\mathbb{S}_{18}$  : 403 drug compounds having side effect “Thrombocytopenia”

|              |              |              |              |              |
|--------------|--------------|--------------|--------------|--------------|
| CID000000143 | CID000000159 | CID000000214 | CID000000298 | CID000000444 |
| CID000000596 | CID000000598 | CID000000772 | CID000001046 | CID000001065 |
| CID000001134 | CID000001775 | CID000001935 | CID000001971 | CID000001972 |

|              |              |              |              |              |
|--------------|--------------|--------------|--------------|--------------|
| CID000002022 | CID000002082 | CID000002123 | CID000002156 | CID000002160 |
| CID000002162 | CID000002170 | CID000002171 | CID000002173 | CID000002179 |
| CID000002182 | CID000002244 | CID000002249 | CID000002250 | CID000002265 |
| CID000002269 | CID000002274 | CID000002311 | CID000002315 | CID000002349 |
| CID000002369 | CID000002375 | CID000002405 | CID000002471 | CID000002477 |
| CID000002478 | CID000002541 | CID000002550 | CID000002554 | CID000002559 |
| CID000002564 | CID000002575 | CID000002578 | CID000002585 | CID000002609 |
| CID000002610 | CID000002617 | CID000002622 | CID000002631 | CID000002637 |
| CID000002646 | CID000002650 | CID000002655 | CID000002656 | CID000002658 |
| CID000002662 | CID000002666 | CID000002675 | CID000002676 | CID000002678 |
| CID000002708 | CID000002719 | CID000002725 | CID000002727 | CID000002732 |
| CID000002751 | CID000002756 | CID000002762 | CID000002764 | CID000002769 |
| CID000002771 | CID000002781 | CID000002786 | CID000002802 | CID000002803 |
| CID000002806 | CID000002818 | CID000002895 | CID000002907 | CID000002909 |
| CID000002913 | CID000002949 | CID000002951 | CID000002973 | CID000002983 |
| CID000002995 | CID000003015 | CID000003032 | CID000003040 | CID000003043 |
| CID000003059 | CID000003062 | CID000003075 | CID000003100 | CID000003108 |
| CID000003114 | CID000003121 | CID000003125 | CID000003143 | CID000003148 |
| CID000003152 | CID000003157 | CID000003158 | CID000003203 | CID000003222 |
| CID000003278 | CID000003279 | CID000003308 | CID000003310 | CID000003324 |
| CID000003325 | CID000003339 | CID000003342 | CID000003345 | CID000003355 |
| CID000003365 | CID000003366 | CID000003367 | CID000003385 | CID000003386 |
| CID000003394 | CID000003397 | CID000003403 | CID000003404 | CID000003414 |
| CID000003419 | CID000003440 | CID000003446 | CID000003449 | CID000003454 |
| CID000003461 | CID000003463 | CID000003467 | CID000003475 | CID000003476 |
| CID000003478 | CID000003488 | CID000003510 | CID000003518 | CID000003639 |
| CID000003647 | CID000003648 | CID000003652 | CID000003657 | CID000003672 |
| CID000003685 | CID000003690 | CID000003696 | CID000003698 | CID000003702 |
| CID000003749 | CID000003750 | CID000003767 | CID000003793 | CID000003823 |
| CID000003825 | CID000003826 | CID000003827 | CID000003877 | CID000003878 |
| CID000003883 | CID000003899 | CID000003929 | CID000003937 | CID000003948 |
| CID000003950 | CID000003956 | CID000003958 | CID000003961 | CID000003962 |
| CID000003964 | CID000004011 | CID000004033 | CID000004044 | CID000004046 |
| CID000004053 | CID000004054 | CID000004060 | CID000004075 | CID000004078 |
| CID000004091 | CID000004095 | CID000004112 | CID000004121 | CID000004138 |
| CID000004158 | CID000004163 | CID000004170 | CID000004171 | CID000004173 |
| CID000004178 | CID000004197 | CID000004200 | CID000004201 | CID000004205 |
| CID000004212 | CID000004253 | CID000004259 | CID000004409 | CID000004421 |
| CID000004440 | CID000004449 | CID000004451 | CID000004463 | CID000004485 |
| CID000004497 | CID000004509 | CID000004513 | CID000004539 | CID000004543 |
| CID000004547 | CID000004583 | CID000004585 | CID000004594 | CID000004609 |
| CID000004614 | CID000004645 | CID000004666 | CID000004679 | CID000004691 |
| CID000004727 | CID000004730 | CID000004740 | CID000004745 | CID000004775 |
| CID000004819 | CID000004834 | CID000004856 | CID000004870 | CID000004885 |

|              |              |              |              |              |
|--------------|--------------|--------------|--------------|--------------|
| CID000004889 | CID000004913 | CID000004915 | CID000004927 | CID000004932 |
| CID000004976 | CID000004993 | CID000005002 | CID000005005 | CID000005029 |
| CID000005038 | CID000005039 | CID000005040 | CID000005064 | CID000005070 |
| CID000005073 | CID000005076 | CID000005077 | CID000005090 | CID000005095 |
| CID000005155 | CID000005203 | CID000005206 | CID000005210 | CID000005215 |
| CID000005253 | CID000005291 | CID000005297 | CID000005300 | CID000005342 |
| CID000005344 | CID000005352 | CID000005358 | CID000005372 | CID000005376 |
| CID000005379 | CID000005394 | CID000005396 | CID000005401 | CID000005402 |
| CID000005412 | CID000005426 | CID000005452 | CID000005453 | CID000005454 |
| CID000005466 | CID000005472 | CID000005479 | CID000005486 | CID000005487 |
| CID000005496 | CID000005503 | CID000005504 | CID000005505 | CID000005508 |
| CID000005514 | CID000005515 | CID000005516 | CID000005523 | CID000005525 |
| CID000005530 | CID000005538 | CID000005546 | CID000005578 | CID000005582 |
| CID000005625 | CID000005645 | CID000005647 | CID000005650 | CID000005651 |
| CID000005656 | CID000005672 | CID000005717 | CID000005718 | CID000005726 |
| CID000005731 | CID000005734 | CID000005746 | CID000005978 | CID000010631 |
| CID000013342 | CID000014888 | CID000018140 | CID000020585 | CID000027661 |
| CID000027991 | CID000030623 | CID000034312 | CID000036811 | CID000038904 |
| CID000039042 | CID000041774 | CID000042615 | CID000047725 | CID000050614 |
| CID000051634 | CID000054454 | CID000054547 | CID000054688 | CID000054786 |
| CID000057537 | CID000059708 | CID000060184 | CID000060613 | CID000060787 |
| CID000060795 | CID000060843 | CID000060877 | CID000060953 | CID000062924 |
| CID000062959 | CID000064147 | CID000065027 | CID000065999 | CID000068740 |
| CID000071158 | CID000071273 | CID000071301 | CID000071616 | CID000072938 |
| CID000074989 | CID000082146 | CID000083786 | CID000093860 | CID000096312 |
| CID000104758 | CID000104865 | CID000115237 | CID000119182 | CID000119607 |
| CID000123631 | CID000125889 | CID000130881 | CID000147912 | CID000150311 |
| CID000150610 | CID000151165 | CID000163742 | CID000166548 | CID000170361 |
| CID000176870 | CID000216239 | CID000216326 | CID000444013 | CID000477468 |
| CID000657298 | CID000667490 | CID001349907 | CID002761171 | CID003062316 |
| CID003081884 | CID004183806 | CID004659568 | CID004659569 | CID005281007 |
| CID005282044 | CID005329102 | CID005353980 | CID005361912 | CID005381226 |
| CID005473385 | CID005481350 | CID005493381 | CID006323497 | CID006398970 |
| CID006918453 | CID009571074 | CID011954225 |              |              |

(19)  $S_{19}$  : 393 drug compounds having side effect “Paresthesia”

|              |              |              |              |              |
|--------------|--------------|--------------|--------------|--------------|
| CID000000085 | CID000000158 | CID000000159 | CID000000191 | CID000000206 |
| CID000000401 | CID000000444 | CID000000450 | CID000000596 | CID000000727 |
| CID000000807 | CID000000815 | CID000000937 | CID000000942 | CID000001003 |
| CID000001690 | CID000001775 | CID000001935 | CID000001971 | CID000001972 |
| CID000001978 | CID000001986 | CID000002022 | CID000002083 | CID000002130 |
| CID000002140 | CID000002142 | CID000002156 | CID000002160 | CID000002162 |
| CID000002170 | CID000002177 | CID000002179 | CID000002182 | CID000002187 |
| CID000002216 | CID000002249 | CID000002250 | CID000002267 | CID000002269 |

|              |              |              |              |              |
|--------------|--------------|--------------|--------------|--------------|
| CID000002274 | CID000002284 | CID000002311 | CID000002315 | CID000002369 |
| CID000002375 | CID000002405 | CID000002443 | CID000002462 | CID000002474 |
| CID000002476 | CID000002487 | CID000002512 | CID000002520 | CID000002541 |
| CID000002550 | CID000002554 | CID000002564 | CID000002578 | CID000002585 |
| CID000002609 | CID000002622 | CID000002650 | CID000002654 | CID000002655 |
| CID000002656 | CID000002662 | CID000002676 | CID000002678 | CID000002713 |
| CID000002720 | CID000002725 | CID000002732 | CID000002751 | CID000002764 |
| CID000002771 | CID000002781 | CID000002800 | CID000002801 | CID000002803 |
| CID000002806 | CID000002818 | CID000002891 | CID000002895 | CID000002909 |
| CID000002913 | CID000002949 | CID000002973 | CID000002995 | CID000003003 |
| CID000003032 | CID000003059 | CID000003066 | CID000003075 | CID000003100 |
| CID000003108 | CID000003114 | CID000003121 | CID000003143 | CID000003148 |
| CID000003152 | CID000003154 | CID000003156 | CID000003157 | CID000003158 |
| CID000003203 | CID000003222 | CID000003251 | CID000003261 | CID000003285 |
| CID000003305 | CID000003308 | CID000003324 | CID000003325 | CID000003333 |
| CID000003339 | CID000003345 | CID000003355 | CID000003365 | CID000003366 |
| CID000003367 | CID000003373 | CID000003387 | CID000003394 | CID000003403 |
| CID000003404 | CID000003410 | CID000003414 | CID000003417 | CID000003419 |
| CID000003440 | CID000003446 | CID000003449 | CID000003454 | CID000003461 |
| CID000003463 | CID000003475 | CID000003476 | CID000003478 | CID000003510 |
| CID000003512 | CID000003518 | CID000003519 | CID000003637 | CID000003639 |
| CID000003640 | CID000003648 | CID000003672 | CID000003675 | CID000003676 |
| CID000003696 | CID000003702 | CID000003706 | CID000003715 | CID000003724 |
| CID000003734 | CID000003736 | CID000003737 | CID000003741 | CID000003746 |
| CID000003749 | CID000003750 | CID000003759 | CID000003767 | CID000003784 |
| CID000003793 | CID000003823 | CID000003825 | CID000003826 | CID000003869 |
| CID000003877 | CID000003878 | CID000003883 | CID000003899 | CID000003902 |
| CID000003911 | CID000003914 | CID000003929 | CID000003937 | CID000003948 |
| CID000003961 | CID000003962 | CID000003964 | CID000004032 | CID000004036 |
| CID000004044 | CID000004046 | CID000004054 | CID000004062 | CID000004064 |
| CID000004075 | CID000004091 | CID000004100 | CID000004121 | CID000004138 |
| CID000004158 | CID000004160 | CID000004163 | CID000004170 | CID000004171 |
| CID000004173 | CID000004178 | CID000004192 | CID000004195 | CID000004200 |
| CID000004205 | CID000004212 | CID000004236 | CID000004253 | CID000004259 |
| CID000004409 | CID000004411 | CID000004421 | CID000004425 | CID000004440 |
| CID000004449 | CID000004451 | CID000004463 | CID000004473 | CID000004485 |
| CID000004493 | CID000004510 | CID000004539 | CID000004543 | CID000004547 |
| CID000004583 | CID000004585 | CID000004594 | CID000004595 | CID000004599 |
| CID000004609 | CID000004614 | CID000004634 | CID000004635 | CID000004666 |
| CID000004679 | CID000004725 | CID000004736 | CID000004739 | CID000004745 |
| CID000004819 | CID000004828 | CID000004856 | CID000004870 | CID000004873 |
| CID000004885 | CID000004889 | CID000004893 | CID000004894 | CID000004915 |
| CID000004920 | CID000004932 | CID000004943 | CID000004946 | CID000004976 |
| CID000005002 | CID000005005 | CID000005029 | CID000005038 | CID000005040 |

|              |              |              |              |              |
|--------------|--------------|--------------|--------------|--------------|
| CID000005070 | CID000005073 | CID000005076 | CID000005077 | CID000005078 |
| CID000005090 | CID000005095 | CID000005152 | CID000005155 | CID000005195 |
| CID000005210 | CID000005212 | CID000005245 | CID000005253 | CID000005291 |
| CID000005297 | CID000005344 | CID000005352 | CID000005358 | CID000005372 |
| CID000005376 | CID000005379 | CID000005394 | CID000005401 | CID000005402 |
| CID000005408 | CID000005426 | CID000005453 | CID000005466 | CID000005478 |
| CID000005479 | CID000005487 | CID000005514 | CID000005515 | CID000005523 |
| CID000005525 | CID000005530 | CID000005533 | CID000005538 | CID000005544 |
| CID000005556 | CID000005584 | CID000005625 | CID000005645 | CID000005647 |
| CID000005650 | CID000005665 | CID000005672 | CID000005719 | CID000005726 |
| CID000005731 | CID000005732 | CID000005734 | CID000005735 | CID000005775 |
| CID000005978 | CID000006049 | CID000006691 | CID000010631 | CID000013342 |
| CID000014888 | CID000019090 | CID000027661 | CID000027686 | CID000038904 |
| CID000039860 | CID000041317 | CID000042615 | CID000048175 | CID000051634 |
| CID000052421 | CID000054454 | CID000054547 | CID000054786 | CID000056959 |
| CID000057537 | CID000059708 | CID000059768 | CID000060184 | CID000060198 |
| CID000060613 | CID000060714 | CID000060754 | CID000060787 | CID000060795 |
| CID000060877 | CID000060953 | CID000062959 | CID000064147 | CID000065999 |
| CID000068740 | CID000071158 | CID000071273 | CID000071301 | CID000071329 |
| CID000071616 | CID000077992 | CID000077993 | CID000082146 | CID000083786 |
| CID000093860 | CID000096312 | CID000104741 | CID000104865 | CID000110634 |
| CID000110635 | CID000119607 | CID000122316 | CID000123606 | CID000123620 |
| CID000125017 | CID000125889 | CID000147912 | CID000148211 | CID000150311 |
| CID000150610 | CID000151165 | CID000158440 | CID000213039 | CID000216326 |
| CID000444013 | CID000450096 | CID000657298 | CID001349907 | CID003002190 |
| CID003081884 | CID004659569 | CID005229711 | CID005281007 | CID005281104 |
| CID005311297 | CID005361912 | CID005481350 |              |              |

(20)  $S_{20}$  : 385 drug compounds having side effect "Fatigue"

|              |              |              |              |              |
|--------------|--------------|--------------|--------------|--------------|
| CID000000143 | CID000000159 | CID000000450 | CID000000596 | CID000000598 |
| CID000000738 | CID000000767 | CID000000807 | CID000000853 | CID000000942 |
| CID000001065 | CID000001134 | CID000001206 | CID000001546 | CID000001690 |
| CID000001935 | CID000001971 | CID000001978 | CID000001986 | CID000002022 |
| CID000002083 | CID000002092 | CID000002099 | CID000002118 | CID000002130 |
| CID000002156 | CID000002160 | CID000002162 | CID000002170 | CID000002177 |
| CID000002179 | CID000002187 | CID000002215 | CID000002216 | CID000002249 |
| CID000002250 | CID000002267 | CID000002269 | CID000002284 | CID000002311 |
| CID000002349 | CID000002369 | CID000002375 | CID000002405 | CID000002435 |
| CID000002441 | CID000002443 | CID000002462 | CID000002471 | CID000002476 |
| CID000002477 | CID000002478 | CID000002512 | CID000002520 | CID000002541 |
| CID000002550 | CID000002554 | CID000002564 | CID000002585 | CID000002654 |
| CID000002662 | CID000002666 | CID000002678 | CID000002708 | CID000002725 |
| CID000002751 | CID000002764 | CID000002769 | CID000002781 | CID000002786 |
| CID000002794 | CID000002800 | CID000002801 | CID000002802 | CID000002803 |

|              |              |              |              |              |
|--------------|--------------|--------------|--------------|--------------|
| CID000002806 | CID000002818 | CID000002895 | CID000002907 | CID000002909 |
| CID000002913 | CID000002949 | CID000002951 | CID000002958 | CID000002978 |
| CID000002995 | CID000003007 | CID000003015 | CID000003016 | CID000003032 |
| CID000003059 | CID000003066 | CID000003075 | CID000003100 | CID000003108 |
| CID000003114 | CID000003125 | CID000003143 | CID000003148 | CID000003152 |
| CID000003154 | CID000003157 | CID000003203 | CID000003222 | CID000003278 |
| CID000003291 | CID000003292 | CID000003310 | CID000003324 | CID000003325 |
| CID000003339 | CID000003342 | CID000003345 | CID000003348 | CID000003355 |
| CID000003365 | CID000003366 | CID000003367 | CID000003373 | CID000003379 |
| CID000003403 | CID000003404 | CID000003410 | CID000003414 | CID000003419 |
| CID000003446 | CID000003449 | CID000003454 | CID000003461 | CID000003463 |
| CID000003475 | CID000003512 | CID000003518 | CID000003519 | CID000003640 |
| CID000003648 | CID000003657 | CID000003661 | CID000003675 | CID000003696 |
| CID000003702 | CID000003706 | CID000003715 | CID000003724 | CID000003746 |
| CID000003749 | CID000003750 | CID000003767 | CID000003784 | CID000003793 |
| CID000003869 | CID000003877 | CID000003878 | CID000003883 | CID000003902 |
| CID000003911 | CID000003915 | CID000003929 | CID000003937 | CID000003948 |
| CID000003954 | CID000003957 | CID000003958 | CID000003961 | CID000004011 |
| CID000004032 | CID000004036 | CID000004046 | CID000004053 | CID000004054 |
| CID000004060 | CID000004075 | CID000004086 | CID000004091 | CID000004100 |
| CID000004112 | CID000004158 | CID000004163 | CID000004168 | CID000004170 |
| CID000004171 | CID000004173 | CID000004178 | CID000004196 | CID000004200 |
| CID000004212 | CID000004253 | CID000004409 | CID000004411 | CID000004428 |
| CID000004440 | CID000004463 | CID000004485 | CID000004506 | CID000004539 |
| CID000004542 | CID000004543 | CID000004583 | CID000004585 | CID000004594 |
| CID000004595 | CID000004599 | CID000004609 | CID000004634 | CID000004635 |
| CID000004666 | CID000004679 | CID000004724 | CID000004739 | CID000004768 |
| CID000004775 | CID000004828 | CID000004834 | CID000004845 | CID000004885 |
| CID000004889 | CID000004893 | CID000004909 | CID000004915 | CID000004920 |
| CID000004927 | CID000004932 | CID000004943 | CID000004946 | CID000004976 |
| CID000005002 | CID000005005 | CID000005038 | CID000005064 | CID000005070 |
| CID000005071 | CID000005073 | CID000005077 | CID000005078 | CID000005090 |
| CID000005095 | CID000005152 | CID000005155 | CID000005245 | CID000005253 |
| CID000005291 | CID000005344 | CID000005352 | CID000005358 | CID000005376 |
| CID000005391 | CID000005394 | CID000005401 | CID000005402 | CID000005408 |
| CID000005426 | CID000005430 | CID000005453 | CID000005454 | CID000005466 |
| CID000005478 | CID000005479 | CID000005487 | CID000005503 | CID000005512 |
| CID000005514 | CID000005515 | CID000005516 | CID000005523 | CID000005525 |
| CID000005533 | CID000005538 | CID000005544 | CID000005546 | CID000005556 |
| CID000005566 | CID000005582 | CID000005584 | CID000005591 | CID000005596 |
| CID000005625 | CID000005645 | CID000005647 | CID000005650 | CID000005665 |
| CID000005672 | CID000005718 | CID000005721 | CID000005726 | CID000005732 |
| CID000005734 | CID000005746 | CID000006049 | CID000006691 | CID000010631 |
| CID000014888 | CID000027400 | CID000027661 | CID000027686 | CID000027991 |

|              |              |              |              |              |
|--------------|--------------|--------------|--------------|--------------|
| CID000028112 | CID000030623 | CID000034312 | CID000039860 | CID000040976 |
| CID000041317 | CID000042615 | CID000044564 | CID000047725 | CID000050294 |
| CID000051634 | CID000054547 | CID000054786 | CID000057469 | CID000057537 |
| CID000059708 | CID000059768 | CID000060184 | CID000060198 | CID000060753 |
| CID000060754 | CID000060787 | CID000060795 | CID000060843 | CID000060852 |
| CID000060865 | CID000060877 | CID000060953 | CID000062816 | CID000062867 |
| CID000062924 | CID000062959 | CID000064147 | CID000065027 | CID000065999 |
| CID000068740 | CID000071301 | CID000072938 | CID000077992 | CID000077993 |
| CID000077999 | CID000082146 | CID000093860 | CID000096312 | CID000104865 |
| CID000110635 | CID000115237 | CID000119182 | CID000119607 | CID000123606 |
| CID000123620 | CID000123631 | CID000124087 | CID000125889 | CID000130881 |
| CID000147912 | CID000148192 | CID000148211 | CID000150310 | CID000150311 |
| CID000150610 | CID000151165 | CID000153941 | CID000158440 | CID000170361 |
| CID000176870 | CID000213039 | CID000216239 | CID000216326 | CID000443871 |
| CID000444033 | CID000450096 | CID000477468 | CID003002190 | CID003062316 |
| CID004183806 | CID004659568 | CID004659569 | CID005281007 | CID005311297 |
| CID005329102 | CID005362070 | CID005381226 | CID005481350 | CID005487301 |
| CID005493381 | CID005493444 | CID006323497 | CID006435110 | CID006436173 |

(21)  $S_{21}$ : 378 drug compounds having side effect "Hypotension"

|              |              |              |              |              |
|--------------|--------------|--------------|--------------|--------------|
| CID000000085 | CID000000158 | CID000000159 | CID000000187 | CID000000191 |
| CID000000206 | CID000000214 | CID000000444 | CID000000453 | CID000000564 |
| CID000000581 | CID000000596 | CID000000598 | CID000000750 | CID000000767 |
| CID000000807 | CID000000861 | CID000000888 | CID000000937 | CID000001065 |
| CID000001775 | CID000001935 | CID000001971 | CID000001972 | CID000001978 |
| CID000002022 | CID000002083 | CID000002092 | CID000002118 | CID000002130 |
| CID000002141 | CID000002142 | CID000002145 | CID000002153 | CID000002156 |
| CID000002160 | CID000002170 | CID000002179 | CID000002182 | CID000002232 |
| CID000002249 | CID000002269 | CID000002274 | CID000002284 | CID000002311 |
| CID000002349 | CID000002369 | CID000002370 | CID000002381 | CID000002405 |
| CID000002431 | CID000002435 | CID000002441 | CID000002462 | CID000002471 |
| CID000002474 | CID000002476 | CID000002477 | CID000002478 | CID000002487 |
| CID000002512 | CID000002550 | CID000002554 | CID000002564 | CID000002576 |
| CID000002578 | CID000002585 | CID000002609 | CID000002637 | CID000002650 |
| CID000002678 | CID000002719 | CID000002720 | CID000002726 | CID000002751 |
| CID000002764 | CID000002771 | CID000002781 | CID000002786 | CID000002803 |
| CID000002806 | CID000002818 | CID000002895 | CID000002913 | CID000002973 |
| CID000002978 | CID000002995 | CID000003007 | CID000003015 | CID000003016 |
| CID000003019 | CID000003032 | CID000003040 | CID000003066 | CID000003100 |
| CID000003114 | CID000003121 | CID000003143 | CID000003148 | CID000003152 |
| CID000003154 | CID000003157 | CID000003158 | CID000003168 | CID000003226 |
| CID000003285 | CID000003308 | CID000003310 | CID000003333 | CID000003339 |
| CID000003340 | CID000003345 | CID000003350 | CID000003355 | CID000003372 |
| CID000003373 | CID000003385 | CID000003386 | CID000003393 | CID000003394 |

|              |              |              |              |              |
|--------------|--------------|--------------|--------------|--------------|
| CID000003404 | CID000003406 | CID000003410 | CID000003414 | CID000003419 |
| CID000003446 | CID000003449 | CID000003454 | CID000003461 | CID000003467 |
| CID000003475 | CID000003476 | CID000003488 | CID000003494 | CID000003510 |
| CID000003518 | CID000003559 | CID000003562 | CID000003636 | CID000003637 |
| CID000003639 | CID000003648 | CID000003672 | CID000003676 | CID000003690 |
| CID000003698 | CID000003715 | CID000003724 | CID000003734 | CID000003736 |
| CID000003737 | CID000003739 | CID000003741 | CID000003746 | CID000003749 |
| CID000003750 | CID000003763 | CID000003779 | CID000003780 | CID000003783 |
| CID000003784 | CID000003793 | CID000003821 | CID000003826 | CID000003869 |
| CID000003877 | CID000003883 | CID000003911 | CID000003914 | CID000003928 |
| CID000003948 | CID000003958 | CID000003961 | CID000003964 | CID000004011 |
| CID000004044 | CID000004046 | CID000004053 | CID000004054 | CID000004058 |
| CID000004062 | CID000004075 | CID000004078 | CID000004095 | CID000004107 |
| CID000004112 | CID000004114 | CID000004140 | CID000004159 | CID000004168 |
| CID000004171 | CID000004178 | CID000004192 | CID000004196 | CID000004197 |
| CID000004201 | CID000004205 | CID000004212 | CID000004236 | CID000004253 |
| CID000004259 | CID000004411 | CID000004419 | CID000004425 | CID000004440 |
| CID000004449 | CID000004473 | CID000004506 | CID000004543 | CID000004585 |
| CID000004595 | CID000004607 | CID000004609 | CID000004614 | CID000004634 |
| CID000004635 | CID000004675 | CID000004679 | CID000004691 | CID000004737 |
| CID000004739 | CID000004740 | CID000004745 | CID000004748 | CID000004812 |
| CID000004819 | CID000004828 | CID000004845 | CID000004856 | CID000004873 |
| CID000004885 | CID000004893 | CID000004913 | CID000004914 | CID000004915 |
| CID000004917 | CID000004920 | CID000004927 | CID000004932 | CID000004943 |
| CID000004946 | CID000004976 | CID000005002 | CID000005005 | CID000005029 |
| CID000005039 | CID000005040 | CID000005064 | CID000005070 | CID000005073 |
| CID000005076 | CID000005077 | CID000005095 | CID000005193 | CID000005195 |
| CID000005203 | CID000005206 | CID000005212 | CID000005234 | CID000005291 |
| CID000005314 | CID000005352 | CID000005358 | CID000005372 | CID000005379 |
| CID000005396 | CID000005401 | CID000005426 | CID000005430 | CID000005452 |
| CID000005454 | CID000005466 | CID000005478 | CID000005487 | CID000005504 |
| CID000005514 | CID000005523 | CID000005525 | CID000005526 | CID000005533 |
| CID000005538 | CID000005566 | CID000005584 | CID000005645 | CID000005650 |
| CID000005651 | CID000005656 | CID000005672 | CID000005719 | CID000005732 |
| CID000005734 | CID000005978 | CID000006049 | CID000006691 | CID000008612 |
| CID000009034 | CID000009433 | CID000014888 | CID000016850 | CID000020585 |
| CID000023897 | CID000027400 | CID000027661 | CID000028112 | CID000032800 |
| CID000034312 | CID000036339 | CID000036811 | CID000038904 | CID000039507 |
| CID000039860 | CID000041693 | CID000041781 | CID000047319 | CID000047320 |
| CID000047725 | CID000051263 | CID000054547 | CID000054786 | CID000056959 |
| CID000057537 | CID000059768 | CID000060184 | CID000060612 | CID000060613 |
| CID000060714 | CID000060753 | CID000060787 | CID000060795 | CID000060953 |
| CID000062867 | CID000062959 | CID000064147 | CID000065999 | CID000068740 |
| CID000071158 | CID000071273 | CID000071616 | CID000074989 | CID000077993 |



|              |              |              |              |              |
|--------------|--------------|--------------|--------------|--------------|
| CID000093860 | CID000096312 | CID000104865 | CID000110634 | CID000110635 |
| CID000115237 | CID000119182 | CID000119607 | CID000123631 | CID000125017 |
| CID000125889 | CID000145068 | CID000147912 | CID000148211 | CID000150610 |
| CID000151165 | CID000158440 | CID000163742 | CID000166548 | CID000170361 |
| CID000176168 | CID000216239 | CID000216326 | CID000315411 | CID000444013 |
| CID000477468 | CID002761171 | CID003002190 | CID003062316 | CID003081884 |
| CID004183806 | CID004659569 | CID005281104 | CID005282044 | CID005282226 |
| CID005311181 | CID005487301 | CID006435110 |              |              |

(22)  $S_{22}$  : 360 drug compounds having side effect "Dyspepsia"

|              |              |              |              |              |
|--------------|--------------|--------------|--------------|--------------|
| CID000000085 | CID000000159 | CID000000214 | CID000000444 | CID000000450 |
| CID000000581 | CID000000598 | CID000000767 | CID000000807 | CID000000937 |
| CID000000942 | CID000001134 | CID000001690 | CID000001775 | CID000001935 |
| CID000001972 | CID000001978 | CID000002083 | CID000002092 | CID000002118 |
| CID000002156 | CID000002162 | CID000002182 | CID000002187 | CID000002244 |
| CID000002249 | CID000002250 | CID000002269 | CID000002284 | CID000002311 |
| CID000002369 | CID000002375 | CID000002405 | CID000002435 | CID000002443 |
| CID000002462 | CID000002476 | CID000002478 | CID000002512 | CID000002520 |
| CID000002541 | CID000002550 | CID000002554 | CID000002585 | CID000002609 |
| CID000002610 | CID000002654 | CID000002656 | CID000002658 | CID000002662 |
| CID000002666 | CID000002675 | CID000002676 | CID000002678 | CID000002713 |
| CID000002751 | CID000002764 | CID000002769 | CID000002771 | CID000002786 |
| CID000002801 | CID000002802 | CID000002806 | CID000002818 | CID000002891 |
| CID000002895 | CID000002909 | CID000003007 | CID000003009 | CID000003015 |
| CID000003016 | CID000003032 | CID000003043 | CID000003059 | CID000003066 |
| CID000003075 | CID000003108 | CID000003114 | CID000003121 | CID000003143 |
| CID000003148 | CID000003152 | CID000003154 | CID000003157 | CID000003158 |
| CID000003161 | CID000003203 | CID000003222 | CID000003261 | CID000003285 |
| CID000003308 | CID000003324 | CID000003333 | CID000003339 | CID000003342 |
| CID000003345 | CID000003348 | CID000003355 | CID000003365 | CID000003379 |
| CID000003386 | CID000003394 | CID000003403 | CID000003404 | CID000003406 |
| CID000003410 | CID000003414 | CID000003417 | CID000003446 | CID000003449 |
| CID000003454 | CID000003463 | CID000003475 | CID000003476 | CID000003478 |
| CID000003510 | CID000003519 | CID000003559 | CID000003648 | CID000003672 |
| CID000003702 | CID000003706 | CID000003715 | CID000003724 | CID000003736 |
| CID000003746 | CID000003749 | CID000003750 | CID000003793 | CID000003825 |
| CID000003826 | CID000003869 | CID000003877 | CID000003878 | CID000003883 |
| CID000003899 | CID000003902 | CID000003911 | CID000003929 | CID000003937 |
| CID000003948 | CID000003954 | CID000003957 | CID000003961 | CID000003962 |
| CID000004044 | CID000004046 | CID000004075 | CID000004091 | CID000004107 |
| CID000004158 | CID000004173 | CID000004178 | CID000004195 | CID000004196 |
| CID000004200 | CID000004205 | CID000004212 | CID000004236 | CID000004253 |
| CID000004259 | CID000004409 | CID000004411 | CID000004419 | CID000004449 |
| CID000004451 | CID000004473 | CID000004485 | CID000004493 | CID000004509 |

|              |              |              |              |              |
|--------------|--------------|--------------|--------------|--------------|
| CID000004513 | CID000004539 | CID000004542 | CID000004547 | CID000004583 |
| CID000004585 | CID000004603 | CID000004609 | CID000004614 | CID000004634 |
| CID000004635 | CID000004691 | CID000004724 | CID000004739 | CID000004740 |
| CID000004745 | CID000004819 | CID000004856 | CID000004885 | CID000004889 |
| CID000004893 | CID000004920 | CID000004932 | CID000005002 | CID000005005 |
| CID000005029 | CID000005035 | CID000005038 | CID000005040 | CID000005064 |
| CID000005070 | CID000005071 | CID000005073 | CID000005076 | CID000005077 |
| CID000005078 | CID000005090 | CID000005095 | CID000005152 | CID000005155 |
| CID000005195 | CID000005203 | CID000005210 | CID000005212 | CID000005245 |
| CID000005253 | CID000005291 | CID000005352 | CID000005372 | CID000005376 |
| CID000005379 | CID000005394 | CID000005401 | CID000005402 | CID000005426 |
| CID000005466 | CID000005472 | CID000005478 | CID000005479 | CID000005487 |
| CID000005496 | CID000005508 | CID000005512 | CID000005514 | CID000005523 |
| CID000005525 | CID000005538 | CID000005544 | CID000005596 | CID000005625 |
| CID000005645 | CID000005647 | CID000005650 | CID000005656 | CID000005665 |
| CID000005717 | CID000005718 | CID000005719 | CID000005726 | CID000005731 |
| CID000005732 | CID000005734 | CID000005735 | CID000006058 | CID000014888 |
| CID000019090 | CID000027661 | CID000027686 | CID000027991 | CID000028112 |
| CID000034312 | CID000039042 | CID000039860 | CID000040976 | CID000041317 |
| CID000041774 | CID000041781 | CID000047725 | CID000050294 | CID000051634 |
| CID000054454 | CID000054547 | CID000054688 | CID000054786 | CID000057469 |
| CID000057537 | CID000059708 | CID000059768 | CID000060184 | CID000060198 |
| CID000060613 | CID000060787 | CID000060795 | CID000060852 | CID000060871 |
| CID000060877 | CID000060953 | CID000062816 | CID000062924 | CID000062959 |
| CID000064147 | CID000065027 | CID000065999 | CID000068740 | CID000068844 |
| CID000071158 | CID000071273 | CID000071616 | CID000072054 | CID000072938 |
| CID000074989 | CID000077992 | CID000077993 | CID000082146 | CID000083786 |
| CID000093860 | CID000104758 | CID000104865 | CID000110634 | CID000110635 |
| CID000115237 | CID000119607 | CID000122316 | CID000123606 | CID000123620 |
| CID000124087 | CID000130881 | CID000147912 | CID000148192 | CID000148211 |
| CID000150610 | CID000151165 | CID000153941 | CID000158440 | CID000160051 |
| CID000163742 | CID000166548 | CID000170361 | CID000176870 | CID000213039 |
| CID000216239 | CID000216326 | CID000443871 | CID000444013 | CID000444033 |
| CID000477468 | CID003002190 | CID003062316 | CID003081884 | CID004183806 |
| CID004479097 | CID004659568 | CID004659569 | CID005281104 | CID005282044 |
| CID005282226 | CID005311027 | CID005311297 | CID005329102 | CID005353980 |
| CID005361912 | CID005362070 | CID005481350 | CID005487301 | CID005493444 |
| CID006323497 | CID006398525 | CID006398970 | CID006918453 | CID009571074 |

(23)  $S_{23}$  : 363 drug compounds having side effect "Tachycardia"

|              |              |              |              |              |
|--------------|--------------|--------------|--------------|--------------|
| CID000000085 | CID000000158 | CID000000159 | CID000000214 | CID000000444 |
| CID000000453 | CID000000581 | CID000000596 | CID000000598 | CID000000681 |
| CID000000750 | CID000000807 | CID000000853 | CID000000861 | CID000000937 |
| CID000001065 | CID000001206 | CID000001546 | CID000001775 | CID000001935 |

|              |              |              |              |              |
|--------------|--------------|--------------|--------------|--------------|
| CID000001972 | CID000002022 | CID000002083 | CID000002092 | CID000002130 |
| CID000002140 | CID000002141 | CID000002145 | CID000002153 | CID000002156 |
| CID000002160 | CID000002162 | CID000002170 | CID000002179 | CID000002182 |
| CID000002267 | CID000002284 | CID000002344 | CID000002349 | CID000002369 |
| CID000002370 | CID000002405 | CID000002435 | CID000002441 | CID000002462 |
| CID000002474 | CID000002476 | CID000002477 | CID000002478 | CID000002487 |
| CID000002541 | CID000002550 | CID000002554 | CID000002564 | CID000002576 |
| CID000002578 | CID000002585 | CID000002658 | CID000002662 | CID000002678 |
| CID000002726 | CID000002751 | CID000002756 | CID000002764 | CID000002769 |
| CID000002771 | CID000002781 | CID000002800 | CID000002801 | CID000002803 |
| CID000002818 | CID000002895 | CID000002905 | CID000002907 | CID000002913 |
| CID000002958 | CID000002973 | CID000002978 | CID000002995 | CID000003003 |
| CID000003007 | CID000003015 | CID000003032 | CID000003042 | CID000003062 |
| CID000003066 | CID000003080 | CID000003100 | CID000003105 | CID000003108 |
| CID000003121 | CID000003143 | CID000003148 | CID000003157 | CID000003158 |
| CID000003168 | CID000003203 | CID000003222 | CID000003251 | CID000003255 |
| CID000003308 | CID000003310 | CID000003333 | CID000003339 | CID000003340 |
| CID000003342 | CID000003345 | CID000003348 | CID000003354 | CID000003372 |
| CID000003373 | CID000003379 | CID000003386 | CID000003394 | CID000003404 |
| CID000003406 | CID000003410 | CID000003419 | CID000003446 | CID000003454 |
| CID000003475 | CID000003494 | CID000003510 | CID000003519 | CID000003559 |
| CID000003636 | CID000003637 | CID000003640 | CID000003648 | CID000003672 |
| CID000003675 | CID000003676 | CID000003696 | CID000003702 | CID000003715 |
| CID000003734 | CID000003736 | CID000003741 | CID000003746 | CID000003749 |
| CID000003779 | CID000003783 | CID000003784 | CID000003793 | CID000003825 |
| CID000003826 | CID000003878 | CID000003883 | CID000003899 | CID000003902 |
| CID000003911 | CID000003937 | CID000003948 | CID000003957 | CID000003958 |
| CID000003961 | CID000003964 | CID000004011 | CID000004044 | CID000004046 |
| CID000004053 | CID000004054 | CID000004057 | CID000004058 | CID000004062 |
| CID000004064 | CID000004075 | CID000004086 | CID000004095 | CID000004140 |
| CID000004158 | CID000004163 | CID000004171 | CID000004192 | CID000004196 |
| CID000004197 | CID000004201 | CID000004205 | CID000004212 | CID000004236 |
| CID000004253 | CID000004259 | CID000004419 | CID000004425 | CID000004428 |
| CID000004449 | CID000004473 | CID000004485 | CID000004493 | CID000004497 |
| CID000004510 | CID000004543 | CID000004583 | CID000004585 | CID000004594 |
| CID000004595 | CID000004601 | CID000004609 | CID000004614 | CID000004635 |
| CID000004675 | CID000004679 | CID000004691 | CID000004736 | CID000004739 |
| CID000004740 | CID000004745 | CID000004748 | CID000004771 | CID000004819 |
| CID000004828 | CID000004845 | CID000004856 | CID000004885 | CID000004893 |
| CID000004894 | CID000004914 | CID000004915 | CID000004920 | CID000004927 |
| CID000004932 | CID000004934 | CID000004943 | CID000004976 | CID000005002 |
| CID000005005 | CID000005029 | CID000005038 | CID000005039 | CID000005040 |
| CID000005064 | CID000005070 | CID000005071 | CID000005073 | CID000005076 |
| CID000005077 | CID000005078 | CID000005090 | CID000005095 | CID000005152 |

|              |              |              |              |              |
|--------------|--------------|--------------|--------------|--------------|
| CID000005195 | CID000005203 | CID000005206 | CID000005210 | CID000005212 |
| CID000005291 | CID000005314 | CID000005344 | CID000005352 | CID000005358 |
| CID000005372 | CID000005379 | CID000005396 | CID000005401 | CID000005403 |
| CID000005426 | CID000005452 | CID000005454 | CID000005466 | CID000005487 |
| CID000005504 | CID000005512 | CID000005514 | CID000005523 | CID000005525 |
| CID000005530 | CID000005533 | CID000005538 | CID000005544 | CID000005556 |
| CID000005572 | CID000005584 | CID000005593 | CID000005596 | CID000005625 |
| CID000005645 | CID000005647 | CID000005656 | CID000005672 | CID000005718 |
| CID000005719 | CID000005731 | CID000005732 | CID000005734 | CID000005735 |
| CID000005775 | CID000007029 | CID000008612 | CID000009034 | CID000009433 |
| CID000010631 | CID000014888 | CID000020585 | CID000023897 | CID000027661 |
| CID000027686 | CID000027991 | CID000034312 | CID000036339 | CID000036811 |
| CID000038904 | CID000039860 | CID000041693 | CID000042113 | CID000047319 |
| CID000047725 | CID000051263 | CID000054688 | CID000054786 | CID000057469 |
| CID000060612 | CID000060613 | CID000060753 | CID000060795 | CID000060953 |
| CID000062816 | CID000062819 | CID000062867 | CID000062959 | CID000064147 |
| CID000065999 | CID000071158 | CID000071273 | CID000071616 | CID000072054 |
| CID000072938 | CID000077992 | CID000077993 | CID000082146 | CID000093860 |
| CID000104865 | CID000110634 | CID000110635 | CID000115237 | CID000119182 |
| CID000119607 | CID000123606 | CID000124087 | CID000125017 | CID000125889 |
| CID000130881 | CID000145068 | CID000147912 | CID000148211 | CID000150610 |
| CID000151165 | CID000158440 | CID000170361 | CID000197712 | CID000213039 |
| CID000216239 | CID000216326 | CID000444013 | CID000450096 | CID000477468 |
| CID003062316 | CID003081884 | CID004479097 | CID004659569 | CID005229711 |
| CID005282044 | CID005353894 | CID011947681 |              |              |

(24)  $S_{24}$  : 361 drug compounds having side effect "Hypersensitivity"

|              |              |              |              |              |
|--------------|--------------|--------------|--------------|--------------|
| CID000000143 | CID000000298 | CID000000401 | CID000000444 | CID000000450 |
| CID000000453 | CID000000564 | CID000000581 | CID000000596 | CID000000772 |
| CID000000807 | CID000000853 | CID000000937 | CID000000942 | CID000001003 |
| CID000001046 | CID000001065 | CID000001206 | CID000001775 | CID000002022 |
| CID000002082 | CID000002083 | CID000002088 | CID000002118 | CID000002140 |
| CID000002145 | CID000002148 | CID000002171 | CID000002173 | CID000002179 |
| CID000002244 | CID000002265 | CID000002274 | CID000002308 | CID000002311 |
| CID000002315 | CID000002349 | CID000002366 | CID000002369 | CID000002375 |
| CID000002405 | CID000002462 | CID000002474 | CID000002476 | CID000002478 |
| CID000002512 | CID000002520 | CID000002522 | CID000002524 | CID000002541 |
| CID000002554 | CID000002559 | CID000002575 | CID000002576 | CID000002578 |
| CID000002583 | CID000002585 | CID000002609 | CID000002610 | CID000002622 |
| CID000002629 | CID000002631 | CID000002646 | CID000002650 | CID000002655 |
| CID000002656 | CID000002658 | CID000002662 | CID000002666 | CID000002673 |
| CID000002675 | CID000002676 | CID000002678 | CID000002708 | CID000002713 |
| CID000002720 | CID000002732 | CID000002751 | CID000002756 | CID000002762 |
| CID000002764 | CID000002771 | CID000002786 | CID000002801 | CID000002806 |

|              |              |              |              |              |
|--------------|--------------|--------------|--------------|--------------|
| CID000002818 | CID000002895 | CID000002907 | CID000002909 | CID000002951 |
| CID000002958 | CID000002973 | CID000002978 | CID000002983 | CID000003007 |
| CID000003015 | CID000003016 | CID000003019 | CID000003059 | CID000003066 |
| CID000003108 | CID000003121 | CID000003125 | CID000003143 | CID000003148 |
| CID000003154 | CID000003157 | CID000003203 | CID000003222 | CID000003255 |
| CID000003279 | CID000003285 | CID000003305 | CID000003310 | CID000003325 |
| CID000003342 | CID000003348 | CID000003350 | CID000003367 | CID000003381 |
| CID000003385 | CID000003387 | CID000003403 | CID000003404 | CID000003410 |
| CID000003440 | CID000003446 | CID000003461 | CID000003475 | CID000003476 |
| CID000003494 | CID000003510 | CID000003512 | CID000003636 | CID000003637 |
| CID000003639 | CID000003640 | CID000003647 | CID000003648 | CID000003657 |
| CID000003661 | CID000003676 | CID000003685 | CID000003690 | CID000003698 |
| CID000003702 | CID000003706 | CID000003715 | CID000003724 | CID000003734 |
| CID000003736 | CID000003737 | CID000003739 | CID000003741 | CID000003742 |
| CID000003746 | CID000003750 | CID000003823 | CID000003826 | CID000003869 |
| CID000003877 | CID000003883 | CID000003899 | CID000003914 | CID000003928 |
| CID000003937 | CID000003954 | CID000003958 | CID000003961 | CID000003962 |
| CID000004030 | CID000004033 | CID000004046 | CID000004053 | CID000004057 |
| CID000004060 | CID000004064 | CID000004075 | CID000004107 | CID000004112 |
| CID000004121 | CID000004138 | CID000004158 | CID000004170 | CID000004171 |
| CID000004173 | CID000004178 | CID000004192 | CID000004200 | CID000004212 |
| CID000004236 | CID000004259 | CID000004409 | CID000004419 | CID000004428 |
| CID000004440 | CID000004451 | CID000004463 | CID000004485 | CID000004509 |
| CID000004513 | CID000004539 | CID000004542 | CID000004547 | CID000004583 |
| CID000004594 | CID000004595 | CID000004599 | CID000004601 | CID000004603 |
| CID000004609 | CID000004645 | CID000004675 | CID000004679 | CID000004730 |
| CID000004737 | CID000004740 | CID000004748 | CID000004812 | CID000004834 |
| CID000004856 | CID000004870 | CID000004889 | CID000004891 | CID000004900 |
| CID000004911 | CID000004914 | CID000004915 | CID000004920 | CID000004946 |
| CID000004993 | CID000005002 | CID000005005 | CID000005038 | CID000005039 |
| CID000005040 | CID000005064 | CID000005073 | CID000005076 | CID000005077 |
| CID000005078 | CID000005090 | CID000005095 | CID000005193 | CID000005203 |
| CID000005210 | CID000005245 | CID000005267 | CID000005291 | CID000005314 |
| CID000005352 | CID000005358 | CID000005359 | CID000005376 | CID000005396 |
| CID000005408 | CID000005412 | CID000005430 | CID000005453 | CID000005478 |
| CID000005479 | CID000005486 | CID000005496 | CID000005514 | CID000005515 |
| CID000005523 | CID000005525 | CID000005538 | CID000005544 | CID000005546 |
| CID000005556 | CID000005578 | CID000005645 | CID000005647 | CID000005650 |
| CID000005665 | CID000005672 | CID000005717 | CID000005718 | CID000005731 |
| CID000005732 | CID000005735 | CID000005771 | CID000005978 | CID000006256 |
| CID000006691 | CID000010631 | CID000016850 | CID000025419 | CID000027661 |
| CID000027686 | CID000032797 | CID000034312 | CID000038904 | CID000039042 |
| CID000042615 | CID000044564 | CID000047320 | CID000047725 | CID000050614 |
| CID000054454 | CID000057469 | CID000060164 | CID000060754 | CID000060787 |

|              |              |              |              |              |
|--------------|--------------|--------------|--------------|--------------|
| CID000060795 | CID000060843 | CID000060865 | CID000060953 | CID000062816 |
| CID000062924 | CID000064147 | CID000065027 | CID000065999 | CID000068740 |
| CID000071301 | CID000072054 | CID000074989 | CID000082146 | CID000083786 |
| CID000093860 | CID000104741 | CID000104865 | CID000110634 | CID000110635 |
| CID000119607 | CID000123620 | CID000124087 | CID000125017 | CID000130881 |
| CID000147912 | CID000148211 | CID000150311 | CID000150610 | CID000151165 |
| CID000158440 | CID000170361 | CID000197712 | CID000213039 | CID000216239 |
| CID000216326 | CID000443871 | CID000444033 | CID000450096 | CID000477468 |
| CID002761171 | CID003002190 | CID003062316 | CID003081884 | CID004183806 |
| CID005281007 | CID005282226 | CID005311297 | CID005353980 | CID005362420 |
| CID005381226 | CID005487301 | CID005493381 | CID006398525 | CID006436173 |
| CID006447131 |              |              |              |              |

(25)  $S_{25}$  : 363 drug compounds having side effect "Confusion"

|              |              |              |              |              |
|--------------|--------------|--------------|--------------|--------------|
| CID000000159 | CID000000206 | CID000000271 | CID000000298 | CID000000401 |
| CID000000444 | CID000000564 | CID000000596 | CID000000598 | CID000000767 |
| CID000000772 | CID000000807 | CID000000942 | CID000001065 | CID000001690 |
| CID000001775 | CID000001935 | CID000001972 | CID000001978 | CID000001986 |
| CID000002022 | CID000002099 | CID000002118 | CID000002130 | CID000002140 |
| CID000002156 | CID000002160 | CID000002170 | CID000002171 | CID000002179 |
| CID000002182 | CID000002187 | CID000002215 | CID000002244 | CID000002249 |
| CID000002267 | CID000002274 | CID000002284 | CID000002344 | CID000002349 |
| CID000002369 | CID000002375 | CID000002405 | CID000002431 | CID000002441 |
| CID000002462 | CID000002476 | CID000002477 | CID000002478 | CID000002487 |
| CID000002512 | CID000002520 | CID000002550 | CID000002554 | CID000002564 |
| CID000002578 | CID000002585 | CID000002609 | CID000002622 | CID000002646 |
| CID000002662 | CID000002666 | CID000002678 | CID000002708 | CID000002712 |
| CID000002725 | CID000002751 | CID000002756 | CID000002764 | CID000002769 |
| CID000002771 | CID000002781 | CID000002801 | CID000002802 | CID000002803 |
| CID000002806 | CID000002818 | CID000002895 | CID000002907 | CID000002909 |
| CID000002913 | CID000002951 | CID000002958 | CID000002978 | CID000002995 |
| CID000003007 | CID000003016 | CID000003019 | CID000003032 | CID000003040 |
| CID000003042 | CID000003059 | CID000003062 | CID000003066 | CID000003075 |
| CID000003100 | CID000003114 | CID000003121 | CID000003125 | CID000003143 |
| CID000003148 | CID000003152 | CID000003154 | CID000003157 | CID000003158 |
| CID000003203 | CID000003222 | CID000003255 | CID000003261 | CID000003278 |
| CID000003279 | CID000003285 | CID000003305 | CID000003308 | CID000003310 |
| CID000003324 | CID000003325 | CID000003333 | CID000003342 | CID000003345 |
| CID000003354 | CID000003355 | CID000003366 | CID000003367 | CID000003373 |
| CID000003385 | CID000003386 | CID000003393 | CID000003394 | CID000003397 |
| CID000003404 | CID000003405 | CID000003414 | CID000003419 | CID000003440 |
| CID000003446 | CID000003449 | CID000003454 | CID000003463 | CID000003467 |
| CID000003475 | CID000003478 | CID000003494 | CID000003512 | CID000003519 |
| CID000003559 | CID000003648 | CID000003661 | CID000003672 | CID000003676 |

|              |              |              |              |              |
|--------------|--------------|--------------|--------------|--------------|
| CID000003690 | CID000003696 | CID000003715 | CID000003724 | CID000003734 |
| CID000003736 | CID000003741 | CID000003750 | CID000003825 | CID000003826 |
| CID000003877 | CID000003878 | CID000003883 | CID000003911 | CID000003914 |
| CID000003937 | CID000003948 | CID000003958 | CID000003961 | CID000003964 |
| CID000004011 | CID000004044 | CID000004046 | CID000004054 | CID000004057 |
| CID000004060 | CID000004075 | CID000004078 | CID000004095 | CID000004100 |
| CID000004107 | CID000004112 | CID000004158 | CID000004168 | CID000004171 |
| CID000004173 | CID000004178 | CID000004192 | CID000004195 | CID000004212 |
| CID000004236 | CID000004253 | CID000004259 | CID000004409 | CID000004419 |
| CID000004428 | CID000004440 | CID000004449 | CID000004473 | CID000004485 |
| CID000004506 | CID000004509 | CID000004513 | CID000004539 | CID000004543 |
| CID000004583 | CID000004585 | CID000004594 | CID000004601 | CID000004603 |
| CID000004614 | CID000004634 | CID000004635 | CID000004666 | CID000004679 |
| CID000004691 | CID000004736 | CID000004737 | CID000004739 | CID000004740 |
| CID000004745 | CID000004748 | CID000004819 | CID000004828 | CID000004845 |
| CID000004856 | CID000004873 | CID000004885 | CID000004915 | CID000004920 |
| CID000004927 | CID000004932 | CID000004934 | CID000004943 | CID000004976 |
| CID000004991 | CID000005002 | CID000005005 | CID000005029 | CID000005038 |
| CID000005039 | CID000005040 | CID000005070 | CID000005071 | CID000005073 |
| CID000005076 | CID000005077 | CID000005078 | CID000005090 | CID000005095 |
| CID000005193 | CID000005195 | CID000005203 | CID000005206 | CID000005210 |
| CID000005267 | CID000005291 | CID000005300 | CID000005358 | CID000005372 |
| CID000005379 | CID000005391 | CID000005394 | CID000005396 | CID000005401 |
| CID000005402 | CID000005408 | CID000005426 | CID000005430 | CID000005452 |
| CID000005453 | CID000005466 | CID000005478 | CID000005479 | CID000005487 |
| CID000005496 | CID000005512 | CID000005514 | CID000005523 | CID000005530 |
| CID000005533 | CID000005538 | CID000005556 | CID000005572 | CID000005582 |
| CID000005584 | CID000005625 | CID000005645 | CID000005647 | CID000005656 |
| CID000005665 | CID000005718 | CID000005719 | CID000005721 | CID000005726 |
| CID000005731 | CID000005732 | CID000005734 | CID000005735 | CID000005746 |
| CID000006058 | CID000006476 | CID000010631 | CID000014888 | CID000018140 |
| CID000019090 | CID000025419 | CID000027400 | CID000027661 | CID000028112 |
| CID000034312 | CID000039860 | CID000041693 | CID000051263 | CID000054547 |
| CID000054688 | CID000057537 | CID000059708 | CID000059768 | CID000060184 |
| CID000060198 | CID000060612 | CID000060613 | CID000060753 | CID000060787 |
| CID000060795 | CID000060953 | CID000062959 | CID000064147 | CID000068740 |
| CID000071158 | CID000071273 | CID000071616 | CID000072054 | CID000077992 |
| CID000077993 | CID000082146 | CID000083786 | CID000093860 | CID000096312 |
| CID000115237 | CID000119607 | CID000122316 | CID000125889 | CID000147912 |
| CID000148192 | CID000150610 | CID000151165 | CID000158440 | CID000163742 |
| CID000213039 | CID000216326 | CID000444013 | CID003062316 | CID003081884 |
| CID004183806 | CID004659568 | CID004659569 | CID005281007 | CID005281104 |
| CID005282044 | CID005361912 | CID005381226 |              |              |

(26)  $S_{26}$  : 360 drug compounds having side effect “Leukopenia”

|              |              |              |              |              |
|--------------|--------------|--------------|--------------|--------------|
| CID000000143 | CID000000298 | CID000000444 | CID000000564 | CID000000596 |
| CID000000598 | CID000000937 | CID000001065 | CID000001775 | CID000001935 |
| CID000001971 | CID000001972 | CID000001986 | CID000002022 | CID000002082 |
| CID000002123 | CID000002130 | CID000002140 | CID000002145 | CID000002160 |
| CID000002162 | CID000002170 | CID000002171 | CID000002173 | CID000002179 |
| CID000002187 | CID000002244 | CID000002265 | CID000002269 | CID000002311 |
| CID000002315 | CID000002349 | CID000002477 | CID000002478 | CID000002541 |
| CID000002554 | CID000002559 | CID000002575 | CID000002576 | CID000002578 |
| CID000002585 | CID000002609 | CID000002617 | CID000002622 | CID000002631 |
| CID000002637 | CID000002650 | CID000002655 | CID000002656 | CID000002658 |
| CID000002662 | CID000002666 | CID000002673 | CID000002675 | CID000002676 |
| CID000002708 | CID000002720 | CID000002726 | CID000002727 | CID000002732 |
| CID000002751 | CID000002764 | CID000002769 | CID000002771 | CID000002786 |
| CID000002802 | CID000002806 | CID000002818 | CID000002895 | CID000002907 |
| CID000002909 | CID000002913 | CID000002949 | CID000002951 | CID000002973 |
| CID000003015 | CID000003016 | CID000003019 | CID000003032 | CID000003040 |
| CID000003043 | CID000003075 | CID000003121 | CID000003143 | CID000003156 |
| CID000003157 | CID000003158 | CID000003161 | CID000003222 | CID000003261 |
| CID000003279 | CID000003291 | CID000003305 | CID000003308 | CID000003310 |
| CID000003324 | CID000003325 | CID000003339 | CID000003345 | CID000003354 |
| CID000003355 | CID000003365 | CID000003366 | CID000003367 | CID000003372 |
| CID000003385 | CID000003386 | CID000003393 | CID000003394 | CID000003397 |
| CID000003403 | CID000003404 | CID000003414 | CID000003419 | CID000003440 |
| CID000003446 | CID000003454 | CID000003461 | CID000003463 | CID000003467 |
| CID000003475 | CID000003476 | CID000003478 | CID000003488 | CID000003510 |
| CID000003512 | CID000003518 | CID000003559 | CID000003637 | CID000003639 |
| CID000003647 | CID000003648 | CID000003652 | CID000003657 | CID000003672 |
| CID000003675 | CID000003685 | CID000003690 | CID000003702 | CID000003715 |
| CID000003750 | CID000003784 | CID000003793 | CID000003823 | CID000003826 |
| CID000003878 | CID000003883 | CID000003899 | CID000003902 | CID000003928 |
| CID000003929 | CID000003937 | CID000003948 | CID000003950 | CID000003956 |
| CID000003961 | CID000003962 | CID000003964 | CID000004033 | CID000004036 |
| CID000004044 | CID000004046 | CID000004053 | CID000004054 | CID000004060 |
| CID000004064 | CID000004075 | CID000004078 | CID000004107 | CID000004112 |
| CID000004121 | CID000004138 | CID000004158 | CID000004168 | CID000004170 |
| CID000004171 | CID000004173 | CID000004178 | CID000004200 | CID000004201 |
| CID000004205 | CID000004212 | CID000004253 | CID000004259 | CID000004409 |
| CID000004421 | CID000004449 | CID000004451 | CID000004485 | CID000004493 |
| CID000004506 | CID000004509 | CID000004539 | CID000004547 | CID000004583 |
| CID000004585 | CID000004594 | CID000004609 | CID000004614 | CID000004616 |
| CID000004635 | CID000004666 | CID000004679 | CID000004691 | CID000004727 |
| CID000004730 | CID000004739 | CID000004740 | CID000004745 | CID000004748 |
| CID000004775 | CID000004819 | CID000004834 | CID000004856 | CID000004870 |



|              |              |              |              |              |
|--------------|--------------|--------------|--------------|--------------|
| CID000004885 | CID000004889 | CID000004908 | CID000004911 | CID000004915 |
| CID000004917 | CID000004927 | CID000004932 | CID000004976 | CID000004993 |
| CID000005002 | CID000005029 | CID000005038 | CID000005039 | CID000005040 |
| CID000005064 | CID000005070 | CID000005073 | CID000005076 | CID000005090 |
| CID000005095 | CID000005155 | CID000005195 | CID000005203 | CID000005210 |
| CID000005212 | CID000005215 | CID000005253 | CID000005291 | CID000005297 |
| CID000005300 | CID000005342 | CID000005344 | CID000005352 | CID000005372 |
| CID000005376 | CID000005394 | CID000005396 | CID000005408 | CID000005426 |
| CID000005430 | CID000005452 | CID000005453 | CID000005454 | CID000005466 |
| CID000005479 | CID000005487 | CID000005496 | CID000005503 | CID000005504 |
| CID000005505 | CID000005514 | CID000005515 | CID000005516 | CID000005525 |
| CID000005530 | CID000005566 | CID000005578 | CID000005625 | CID000005645 |
| CID000005647 | CID000005656 | CID000005672 | CID000005718 | CID000005726 |
| CID000005731 | CID000005732 | CID000005734 | CID000005746 | CID000005978 |
| CID000006058 | CID000006476 | CID000007029 | CID000013342 | CID000016362 |
| CID000018140 | CID000019090 | CID000020585 | CID000023897 | CID000027661 |
| CID000030623 | CID000034312 | CID000038904 | CID000039860 | CID000042615 |
| CID000047725 | CID000050294 | CID000050614 | CID000051634 | CID000054454 |
| CID000054547 | CID000054688 | CID000059708 | CID000060184 | CID000060613 |
| CID000060787 | CID000060795 | CID000060843 | CID000060953 | CID000062867 |
| CID000062924 | CID000062959 | CID000064147 | CID000068740 | CID000071158 |
| CID000071616 | CID000072938 | CID000074989 | CID000077993 | CID000082146 |
| CID000083786 | CID000093860 | CID000096312 | CID000104741 | CID000104758 |
| CID000119182 | CID000119607 | CID000122316 | CID000125889 | CID000130881 |
| CID000147912 | CID000153941 | CID000166548 | CID000216239 | CID000216326 |
| CID000477468 | CID000657298 | CID000667490 | CID001349907 | CID003002190 |
| CID003081884 | CID004659568 | CID005281007 | CID005281104 | CID005282044 |
| CID005329102 | CID005353980 | CID005361912 | CID005381226 | CID006323497 |
| CID006398970 | CID006435110 | CID006918453 | CID009571074 | CID011954225 |

(27)  $S_{27}$  : 354 drug compounds having side effect "Dry mouth"

|              |              |              |              |              |
|--------------|--------------|--------------|--------------|--------------|
| CID000000159 | CID000000191 | CID000000214 | CID000000444 | CID000000738 |
| CID000000767 | CID000000807 | CID000000937 | CID000000942 | CID000001148 |
| CID000001690 | CID000001775 | CID000001972 | CID000002083 | CID000002099 |
| CID000002130 | CID000002156 | CID000002160 | CID000002162 | CID000002170 |
| CID000002182 | CID000002187 | CID000002216 | CID000002249 | CID000002250 |
| CID000002267 | CID000002269 | CID000002284 | CID000002344 | CID000002369 |
| CID000002375 | CID000002381 | CID000002405 | CID000002435 | CID000002441 |
| CID000002443 | CID000002462 | CID000002471 | CID000002476 | CID000002478 |
| CID000002487 | CID000002512 | CID000002520 | CID000002524 | CID000002541 |
| CID000002550 | CID000002554 | CID000002559 | CID000002575 | CID000002585 |
| CID000002654 | CID000002662 | CID000002678 | CID000002713 | CID000002726 |
| CID000002751 | CID000002764 | CID000002769 | CID000002771 | CID000002801 |
| CID000002802 | CID000002803 | CID000002818 | CID000002895 | CID000002909 |

|              |              |              |              |              |
|--------------|--------------|--------------|--------------|--------------|
| CID000002958 | CID000002978 | CID000002995 | CID000003007 | CID000003016 |
| CID000003019 | CID000003032 | CID000003042 | CID000003043 | CID000003066 |
| CID000003075 | CID000003108 | CID000003114 | CID000003121 | CID000003125 |
| CID000003143 | CID000003148 | CID000003151 | CID000003152 | CID000003154 |
| CID000003157 | CID000003158 | CID000003161 | CID000003203 | CID000003222 |
| CID000003261 | CID000003308 | CID000003324 | CID000003325 | CID000003333 |
| CID000003339 | CID000003342 | CID000003345 | CID000003348 | CID000003354 |
| CID000003355 | CID000003365 | CID000003366 | CID000003372 | CID000003373 |
| CID000003386 | CID000003393 | CID000003394 | CID000003404 | CID000003410 |
| CID000003414 | CID000003417 | CID000003419 | CID000003446 | CID000003449 |
| CID000003454 | CID000003475 | CID000003476 | CID000003494 | CID000003510 |
| CID000003518 | CID000003519 | CID000003559 | CID000003636 | CID000003648 |
| CID000003658 | CID000003672 | CID000003675 | CID000003696 | CID000003702 |
| CID000003724 | CID000003736 | CID000003737 | CID000003741 | CID000003742 |
| CID000003746 | CID000003759 | CID000003784 | CID000003825 | CID000003826 |
| CID000003827 | CID000003869 | CID000003877 | CID000003878 | CID000003883 |
| CID000003899 | CID000003902 | CID000003911 | CID000003915 | CID000003929 |
| CID000003937 | CID000003948 | CID000003954 | CID000003957 | CID000003961 |
| CID000003962 | CID000003964 | CID000004011 | CID000004034 | CID000004044 |
| CID000004057 | CID000004058 | CID000004075 | CID000004078 | CID000004086 |
| CID000004095 | CID000004158 | CID000004170 | CID000004171 | CID000004173 |
| CID000004178 | CID000004195 | CID000004200 | CID000004205 | CID000004236 |
| CID000004253 | CID000004259 | CID000004264 | CID000004409 | CID000004411 |
| CID000004419 | CID000004428 | CID000004440 | CID000004449 | CID000004473 |
| CID000004485 | CID000004493 | CID000004513 | CID000004539 | CID000004543 |
| CID000004583 | CID000004585 | CID000004594 | CID000004595 | CID000004609 |
| CID000004614 | CID000004635 | CID000004679 | CID000004691 | CID000004736 |
| CID000004740 | CID000004745 | CID000004748 | CID000004828 | CID000004845 |
| CID000004856 | CID000004885 | CID000004893 | CID000004915 | CID000004919 |
| CID000004920 | CID000004927 | CID000004932 | CID000004943 | CID000004976 |
| CID000005002 | CID000005005 | CID000005029 | CID000005038 | CID000005064 |
| CID000005070 | CID000005071 | CID000005073 | CID000005076 | CID000005077 |
| CID000005078 | CID000005090 | CID000005095 | CID000005152 | CID000005155 |
| CID000005195 | CID000005203 | CID000005206 | CID000005210 | CID000005212 |
| CID000005245 | CID000005358 | CID000005372 | CID000005376 | CID000005391 |
| CID000005394 | CID000005401 | CID000005402 | CID000005403 | CID000005408 |
| CID000005426 | CID000005454 | CID000005466 | CID000005478 | CID000005487 |
| CID000005512 | CID000005514 | CID000005523 | CID000005525 | CID000005530 |
| CID000005533 | CID000005538 | CID000005544 | CID000005546 | CID000005556 |
| CID000005566 | CID000005584 | CID000005596 | CID000005625 | CID000005645 |
| CID000005647 | CID000005650 | CID000005656 | CID000005718 | CID000005719 |
| CID000005731 | CID000005732 | CID000005734 | CID000005735 | CID000007029 |
| CID000014888 | CID000016362 | CID000019090 | CID000023897 | CID000027400 |
| CID000027661 | CID000027991 | CID000028112 | CID000034312 | CID000039860 |

|              |              |              |              |              |
|--------------|--------------|--------------|--------------|--------------|
| CID000041317 | CID000042615 | CID000047725 | CID000051634 | CID000054547 |
| CID000054688 | CID000056959 | CID000057537 | CID000059768 | CID000060184 |
| CID000060612 | CID000060613 | CID000060714 | CID000060754 | CID000060787 |
| CID000060795 | CID000060865 | CID000060953 | CID000062867 | CID000062924 |
| CID000062959 | CID000064147 | CID000065999 | CID000068740 | CID000068844 |
| CID000071158 | CID000071616 | CID000072054 | CID000072938 | CID000077992 |
| CID000077993 | CID000082146 | CID000104865 | CID000110634 | CID000110635 |
| CID000115237 | CID000119607 | CID000122316 | CID000123606 | CID000123620 |
| CID000123631 | CID000124087 | CID000125017 | CID000125889 | CID000147912 |
| CID000148192 | CID000148211 | CID000150610 | CID000151165 | CID000158440 |
| CID000170361 | CID000213039 | CID000216239 | CID000216326 | CID000444013 |
| CID000444033 | CID000450096 | CID003002190 | CID003081884 | CID004659568 |
| CID004659569 | CID005281104 | CID005282044 | CID005311027 | CID005329102 |
| CID005362070 | CID006398525 | CID006398970 | CID009571074 |              |

(28)  $S_{28}$  : 341 drug compounds having side effect "Cough"

|              |              |              |              |              |
|--------------|--------------|--------------|--------------|--------------|
| CID000000085 | CID000000158 | CID000000159 | CID000000191 | CID000000214 |
| CID000000444 | CID000000450 | CID000000581 | CID000000596 | CID000000598 |
| CID000000807 | CID000000937 | CID000000942 | CID000001125 | CID000001134 |
| CID000001546 | CID000001690 | CID000001775 | CID000001935 | CID000001971 |
| CID000001972 | CID000001978 | CID000002083 | CID000002140 | CID000002156 |
| CID000002162 | CID000002182 | CID000002187 | CID000002232 | CID000002249 |
| CID000002267 | CID000002269 | CID000002308 | CID000002311 | CID000002369 |
| CID000002375 | CID000002405 | CID000002435 | CID000002462 | CID000002476 |
| CID000002478 | CID000002487 | CID000002541 | CID000002550 | CID000002578 |
| CID000002585 | CID000002609 | CID000002658 | CID000002662 | CID000002676 |
| CID000002678 | CID000002708 | CID000002713 | CID000002726 | CID000002751 |
| CID000002764 | CID000002769 | CID000002771 | CID000002786 | CID000002801 |
| CID000002802 | CID000002806 | CID000002818 | CID000002907 | CID000002909 |
| CID000002955 | CID000002958 | CID000002978 | CID000003015 | CID000003016 |
| CID000003019 | CID000003032 | CID000003075 | CID000003108 | CID000003121 |
| CID000003143 | CID000003148 | CID000003152 | CID000003154 | CID000003156 |
| CID000003157 | CID000003161 | CID000003203 | CID000003222 | CID000003241 |
| CID000003261 | CID000003285 | CID000003310 | CID000003325 | CID000003333 |
| CID000003339 | CID000003345 | CID000003348 | CID000003355 | CID000003367 |
| CID000003373 | CID000003379 | CID000003381 | CID000003386 | CID000003394 |
| CID000003403 | CID000003404 | CID000003410 | CID000003414 | CID000003419 |
| CID000003446 | CID000003449 | CID000003454 | CID000003461 | CID000003463 |
| CID000003475 | CID000003510 | CID000003648 | CID000003702 | CID000003706 |
| CID000003734 | CID000003736 | CID000003737 | CID000003741 | CID000003742 |
| CID000003746 | CID000003749 | CID000003750 | CID000003763 | CID000003784 |
| CID000003793 | CID000003826 | CID000003877 | CID000003878 | CID000003883 |
| CID000003899 | CID000003902 | CID000003911 | CID000003915 | CID000003929 |
| CID000003937 | CID000003948 | CID000003957 | CID000004053 | CID000004054 |

CID000004075 CID000004086 CID000004112 CID000004158 CID000004170  
CID000004192 CID000004200 CID000004201 CID000004205 CID000004212  
CID000004236 CID000004253 CID000004259 CID000004264 CID000004409  
CID000004411 CID000004428 CID000004440 CID000004449 CID000004485  
CID000004493 CID000004509 CID000004513 CID000004542 CID000004583  
CID000004585 CID000004594 CID000004599 CID000004609 CID000004634  
CID000004635 CID000004666 CID000004679 CID000004691 CID000004724  
CID000004739 CID000004745 CID000004748 CID000004819 CID000004845  
CID000004885 CID000004889 CID000004893 CID000004915 CID000004917  
CID000004920 CID000004932 CID000004943 CID000005002 CID000005005  
CID000005035 CID000005038 CID000005040 CID000005064 CID000005070  
CID000005071 CID000005073 CID000005076 CID000005077 CID000005078  
CID000005090 CID000005095 CID000005152 CID000005155 CID000005195  
CID000005203 CID000005206 CID000005210 CID000005212 CID000005245  
CID000005253 CID000005291 CID000005344 CID000005358 CID000005372  
CID000005376 CID000005394 CID000005401 CID000005402 CID000005426  
CID000005454 CID000005466 CID000005478 CID000005496 CID000005514  
CID000005515 CID000005523 CID000005525 CID000005538 CID000005544  
CID000005566 CID000005625 CID000005636 CID000005645 CID000005650  
CID000005656 CID000005665 CID000005672 CID000005718 CID000005726  
CID000005731 CID000005732 CID000005734 CID000005746 CID000012536  
CID000012555 CID000014888 CID000019090 CID000027661 CID000027686  
CID000027991 CID000030623 CID000031477 CID000034312 CID000039860  
CID000040976 CID000041317 CID000041781 CID000042113 CID000047725  
CID000050294 CID000054547 CID000054688 CID000054786 CID000057469  
CID000057537 CID000059708 CID000060184 CID000060198 CID000060613  
CID000060714 CID000060787 CID000060795 CID000060865 CID000060871  
CID000060877 CID000060953 CID000062819 CID000062924 CID000062959  
CID000064147 CID000065027 CID000065999 CID000068740 CID000071158  
CID000071273 CID000071329 CID000071616 CID000072054 CID000074989  
CID000077993 CID000077999 CID000082146 CID000093860 CID000096312  
CID000104741 CID000104758 CID000104865 CID000115237 CID000119182  
CID000119607 CID000122316 CID000123620 CID000123631 CID000125889  
CID000130881 CID000147912 CID000148192 CID000150310 CID000150311  
CID000150610 CID000151165 CID000158440 CID000160051 CID000163742  
CID000166548 CID000170361 CID000176870 CID000197712 CID000213039  
CID000216239 CID000216326 CID000443871 CID000444013 CID000444033  
CID000477468 CID003062316 CID003081884 CID004659569 CID005229711  
CID005281104 CID005282044 CID005311027 CID005311181 CID005329102  
CID005353980 CID005362070 CID005362420 CID005493381 CID005493444  
CID006447131

(29)  $S_{29}$  : 347 drug compounds having side effect "Asthenia"

CID000000085 CID000000159 CID000000214 CID000000444 CID000000450

|              |              |              |              |              |
|--------------|--------------|--------------|--------------|--------------|
| CID00000596  | CID00000598  | CID00000937  | CID000001065 | CID000001546 |
| CID000001690 | CID000001775 | CID000001935 | CID000001972 | CID000002022 |
| CID000002083 | CID000002088 | CID000002092 | CID000002118 | CID000002156 |
| CID000002162 | CID000002179 | CID000002182 | CID000002187 | CID000002216 |
| CID000002250 | CID000002269 | CID000002284 | CID000002311 | CID000002349 |
| CID000002369 | CID000002375 | CID000002405 | CID000002435 | CID000002443 |
| CID000002462 | CID000002476 | CID000002478 | CID000002487 | CID000002512 |
| CID000002520 | CID000002541 | CID000002550 | CID000002554 | CID000002578 |
| CID000002583 | CID000002585 | CID000002609 | CID000002662 | CID000002676 |
| CID000002678 | CID000002751 | CID000002764 | CID000002771 | CID000002801 |
| CID000002802 | CID000002803 | CID000002806 | CID000002891 | CID000002895 |
| CID000002907 | CID000002909 | CID000002978 | CID000003007 | CID000003009 |
| CID000003015 | CID000003016 | CID000003032 | CID000003043 | CID000003059 |
| CID000003066 | CID000003075 | CID000003108 | CID000003121 | CID000003143 |
| CID000003151 | CID000003152 | CID000003154 | CID000003157 | CID000003203 |
| CID000003219 | CID000003222 | CID000003261 | CID000003285 | CID000003308 |
| CID000003310 | CID000003325 | CID000003333 | CID000003339 | CID000003342 |
| CID000003345 | CID000003350 | CID000003355 | CID000003365 | CID000003373 |
| CID000003386 | CID000003394 | CID000003403 | CID000003404 | CID000003410 |
| CID000003414 | CID000003417 | CID000003446 | CID000003449 | CID000003454 |
| CID000003461 | CID000003475 | CID000003476 | CID000003478 | CID000003488 |
| CID000003510 | CID000003518 | CID000003519 | CID000003639 | CID000003648 |
| CID000003652 | CID000003657 | CID000003672 | CID000003676 | CID000003690 |
| CID000003702 | CID000003706 | CID000003736 | CID000003749 | CID000003750 |
| CID000003793 | CID000003826 | CID000003869 | CID000003878 | CID000003883 |
| CID000003899 | CID000003902 | CID000003911 | CID000003914 | CID000003929 |
| CID000003937 | CID000003948 | CID000003958 | CID000003961 | CID000003962 |
| CID000004033 | CID000004044 | CID000004046 | CID000004054 | CID000004075 |
| CID000004091 | CID000004095 | CID000004138 | CID000004158 | CID000004168 |
| CID000004170 | CID000004195 | CID000004196 | CID000004201 | CID000004205 |
| CID000004212 | CID000004236 | CID000004253 | CID000004259 | CID000004409 |
| CID000004428 | CID000004449 | CID000004451 | CID000004473 | CID000004485 |
| CID000004493 | CID000004509 | CID000004510 | CID000004513 | CID000004539 |
| CID000004542 | CID000004583 | CID000004585 | CID000004594 | CID000004614 |
| CID000004635 | CID000004666 | CID000004679 | CID000004691 | CID000004724 |
| CID000004739 | CID000004745 | CID000004819 | CID000004856 | CID000004885 |
| CID000004889 | CID000004891 | CID000004893 | CID000004920 | CID000004927 |
| CID000004943 | CID000004946 | CID000005002 | CID000005005 | CID000005029 |
| CID000005038 | CID000005040 | CID000005064 | CID000005070 | CID000005071 |
| CID000005073 | CID000005076 | CID000005077 | CID000005078 | CID000005090 |
| CID000005095 | CID000005155 | CID000005195 | CID000005203 | CID000005206 |
| CID000005210 | CID000005212 | CID000005245 | CID000005253 | CID000005291 |
| CID000005344 | CID000005372 | CID000005376 | CID000005379 | CID000005394 |
| CID000005396 | CID000005401 | CID000005408 | CID000005426 | CID000005466 |

|              |              |              |              |              |
|--------------|--------------|--------------|--------------|--------------|
| CID000005472 | CID000005478 | CID000005487 | CID000005496 | CID000005508 |
| CID000005514 | CID000005515 | CID000005516 | CID000005523 | CID000005525 |
| CID000005538 | CID000005544 | CID000005625 | CID000005645 | CID000005647 |
| CID000005650 | CID000005656 | CID000005665 | CID000005672 | CID000005717 |
| CID000005718 | CID000005719 | CID000005726 | CID000005731 | CID000005732 |
| CID000005734 | CID000005735 | CID000005746 | CID000006691 | CID000010631 |
| CID000019090 | CID000027661 | CID000027991 | CID000031477 | CID000034312 |
| CID000038904 | CID000039860 | CID000040976 | CID000041744 | CID000041781 |
| CID000042615 | CID000051634 | CID000054454 | CID000054547 | CID000054688 |
| CID000054786 | CID000056959 | CID000057537 | CID000059708 | CID000059768 |
| CID000060184 | CID000060198 | CID000060613 | CID000060753 | CID000060754 |
| CID000060787 | CID000060795 | CID000060852 | CID000060865 | CID000060871 |
| CID000060877 | CID000060953 | CID000062959 | CID000064147 | CID000065027 |
| CID000065999 | CID000068740 | CID000071158 | CID000071273 | CID000071301 |
| CID000071329 | CID000071616 | CID000072054 | CID000072938 | CID000074989 |
| CID000077992 | CID000077993 | CID000082146 | CID000083786 | CID000093860 |
| CID000096312 | CID000104741 | CID000104758 | CID000110634 | CID000110635 |
| CID000115237 | CID000119607 | CID000122316 | CID000123606 | CID000123631 |
| CID000125017 | CID000125889 | CID000130881 | CID000147912 | CID000148192 |
| CID000150610 | CID000151165 | CID000160051 | CID000170361 | CID000213039 |
| CID000216239 | CID000216326 | CID000443871 | CID000444013 | CID003002190 |
| CID003062316 | CID003081884 | CID004183806 | CID004659568 | CID004659569 |
| CID005281104 | CID005282044 | CID005311027 | CID005311297 | CID005329102 |
| CID005361912 | CID005362420 | CID005481350 | CID005493444 | CID006398970 |
| CID006435110 | CID009571074 |              |              |              |

(30)  $S_{30}$ : 344 drug compounds having side effect "Arthralgia"

|              |              |              |              |              |
|--------------|--------------|--------------|--------------|--------------|
| CID000000158 | CID000000159 | CID000000444 | CID000000450 | CID000000596 |
| CID000000598 | CID000000738 | CID000000767 | CID000000853 | CID000000937 |
| CID000000942 | CID000001046 | CID000001065 | CID000001125 | CID000001134 |
| CID000001546 | CID000001690 | CID000001775 | CID000001935 | CID000001971 |
| CID000001972 | CID000001978 | CID000002022 | CID000002092 | CID000002118 |
| CID000002140 | CID000002142 | CID000002162 | CID000002182 | CID000002187 |
| CID000002215 | CID000002250 | CID000002265 | CID000002269 | CID000002311 |
| CID000002349 | CID000002369 | CID000002405 | CID000002435 | CID000002462 |
| CID000002477 | CID000002478 | CID000002512 | CID000002520 | CID000002541 |
| CID000002550 | CID000002554 | CID000002585 | CID000002609 | CID000002610 |
| CID000002658 | CID000002662 | CID000002666 | CID000002673 | CID000002676 |
| CID000002678 | CID000002713 | CID000002751 | CID000002756 | CID000002764 |
| CID000002769 | CID000002771 | CID000002786 | CID000002800 | CID000002801 |
| CID000002802 | CID000002803 | CID000002806 | CID000002818 | CID000002909 |
| CID000002949 | CID000002958 | CID000002973 | CID000003032 | CID000003040 |
| CID000003043 | CID000003066 | CID000003075 | CID000003108 | CID000003121 |
| CID000003143 | CID000003148 | CID000003152 | CID000003154 | CID000003157 |

|              |              |              |              |              |
|--------------|--------------|--------------|--------------|--------------|
| CID000003161 | CID000003203 | CID000003222 | CID000003261 | CID000003279 |
| CID000003285 | CID000003305 | CID000003325 | CID000003333 | CID000003339 |
| CID000003345 | CID000003355 | CID000003367 | CID000003381 | CID000003386 |
| CID000003393 | CID000003403 | CID000003404 | CID000003410 | CID000003414 |
| CID000003419 | CID000003446 | CID000003449 | CID000003454 | CID000003461 |
| CID000003463 | CID000003467 | CID000003475 | CID000003478 | CID000003488 |
| CID000003519 | CID000003637 | CID000003648 | CID000003702 | CID000003706 |
| CID000003736 | CID000003784 | CID000003793 | CID000003877 | CID000003878 |
| CID000003883 | CID000003899 | CID000003902 | CID000003911 | CID000003937 |
| CID000003948 | CID000003961 | CID000003962 | CID000004046 | CID000004054 |
| CID000004075 | CID000004112 | CID000004138 | CID000004158 | CID000004159 |
| CID000004163 | CID000004170 | CID000004171 | CID000004173 | CID000004178 |
| CID000004200 | CID000004205 | CID000004212 | CID000004236 | CID000004253 |
| CID000004259 | CID000004421 | CID000004428 | CID000004440 | CID000004449 |
| CID000004451 | CID000004463 | CID000004473 | CID000004485 | CID000004509 |
| CID000004539 | CID000004547 | CID000004583 | CID000004585 | CID000004594 |
| CID000004607 | CID000004609 | CID000004634 | CID000004635 | CID000004666 |
| CID000004679 | CID000004691 | CID000004727 | CID000004739 | CID000004745 |
| CID000004819 | CID000004828 | CID000004885 | CID000004889 | CID000004893 |
| CID000004913 | CID000004915 | CID000004920 | CID000005002 | CID000005005 |
| CID000005029 | CID000005035 | CID000005038 | CID000005039 | CID000005040 |
| CID000005064 | CID000005070 | CID000005073 | CID000005076 | CID000005077 |
| CID000005078 | CID000005090 | CID000005095 | CID000005152 | CID000005155 |
| CID000005195 | CID000005203 | CID000005210 | CID000005212 | CID000005215 |
| CID000005245 | CID000005291 | CID000005344 | CID000005352 | CID000005358 |
| CID000005372 | CID000005376 | CID000005379 | CID000005394 | CID000005401 |
| CID000005402 | CID000005408 | CID000005412 | CID000005426 | CID000005466 |
| CID000005478 | CID000005479 | CID000005487 | CID000005512 | CID000005514 |
| CID000005515 | CID000005523 | CID000005525 | CID000005533 | CID000005538 |
| CID000005625 | CID000005645 | CID000005647 | CID000005650 | CID000005656 |
| CID000005665 | CID000005672 | CID000005717 | CID000005718 | CID000005719 |
| CID000005721 | CID000005726 | CID000005731 | CID000005732 | CID000005734 |
| CID000005978 | CID000006049 | CID000010631 | CID000014888 | CID000027661 |
| CID000027686 | CID000028112 | CID000034312 | CID000039860 | CID000040976 |
| CID000041317 | CID000041781 | CID000042615 | CID000047725 | CID000054454 |
| CID000054786 | CID000057469 | CID000057537 | CID000059708 | CID000060184 |
| CID000060198 | CID000060613 | CID000060753 | CID000060754 | CID000060787 |
| CID000060795 | CID000060843 | CID000060852 | CID000060877 | CID000060953 |
| CID000062816 | CID000062924 | CID000062959 | CID000064147 | CID000065999 |
| CID000068740 | CID000071158 | CID000071273 | CID000071329 | CID000071616 |
| CID000072054 | CID000072938 | CID000077992 | CID000077993 | CID000077999 |
| CID000082146 | CID000083786 | CID000093860 | CID000096312 | CID000104758 |
| CID000104865 | CID000110634 | CID000110635 | CID000115237 | CID000119182 |
| CID000119607 | CID000122316 | CID000123606 | CID000123620 | CID000125889 |

|              |              |              |              |              |
|--------------|--------------|--------------|--------------|--------------|
| CID000130881 | CID000147912 | CID000148192 | CID000148211 | CID000150311 |
| CID000150610 | CID000151165 | CID000158440 | CID000170361 | CID000176870 |
| CID000197712 | CID000213039 | CID000216239 | CID000216326 | CID000444013 |
| CID000444033 | CID000477468 | CID000657298 | CID001349907 | CID003062316 |
| CID003081884 | CID004183806 | CID004659568 | CID004659569 | CID005281104 |
| CID005311297 | CID005329102 | CID005353980 | CID005361912 | CID005362070 |
| CID005362420 | CID005481350 | CID005493381 | CID005493444 | CID006323497 |
| CID006435110 | CID006436173 | CID006447131 | CID009571074 |              |

(31)  $S_{31}$ : 337 drug compounds having side effect "Vertigo"

|              |              |              |              |              |
|--------------|--------------|--------------|--------------|--------------|
| CID000000085 | CID000000401 | CID000000444 | CID000000450 | CID000000453 |
| CID000000750 | CID000000767 | CID000000807 | CID000000815 | CID000000937 |
| CID000000942 | CID000001065 | CID000001690 | CID000001775 | CID000001935 |
| CID000001972 | CID000001978 | CID000002082 | CID000002083 | CID000002088 |
| CID000002092 | CID000002118 | CID000002123 | CID000002131 | CID000002156 |
| CID000002162 | CID000002244 | CID000002249 | CID000002267 | CID000002269 |
| CID000002274 | CID000002311 | CID000002315 | CID000002369 | CID000002405 |
| CID000002431 | CID000002443 | CID000002462 | CID000002471 | CID000002476 |
| CID000002477 | CID000002487 | CID000002512 | CID000002520 | CID000002541 |
| CID000002554 | CID000002564 | CID000002576 | CID000002585 | CID000002609 |
| CID000002610 | CID000002662 | CID000002676 | CID000002678 | CID000002720 |
| CID000002725 | CID000002732 | CID000002751 | CID000002764 | CID000002771 |
| CID000002781 | CID000002786 | CID000002800 | CID000002801 | CID000002802 |
| CID000002806 | CID000002818 | CID000002895 | CID000002909 | CID000002913 |
| CID000003003 | CID000003009 | CID000003016 | CID000003032 | CID000003059 |
| CID000003066 | CID000003075 | CID000003100 | CID000003108 | CID000003114 |
| CID000003121 | CID000003148 | CID000003152 | CID000003154 | CID000003157 |
| CID000003158 | CID000003222 | CID000003255 | CID000003278 | CID000003285 |
| CID000003308 | CID000003310 | CID000003339 | CID000003345 | CID000003354 |
| CID000003355 | CID000003365 | CID000003366 | CID000003373 | CID000003379 |
| CID000003381 | CID000003386 | CID000003394 | CID000003403 | CID000003404 |
| CID000003406 | CID000003419 | CID000003440 | CID000003446 | CID000003449 |
| CID000003463 | CID000003467 | CID000003478 | CID000003510 | CID000003519 |
| CID000003559 | CID000003639 | CID000003640 | CID000003647 | CID000003648 |
| CID000003652 | CID000003661 | CID000003672 | CID000003702 | CID000003715 |
| CID000003724 | CID000003736 | CID000003741 | CID000003749 | CID000003750 |
| CID000003779 | CID000003793 | CID000003825 | CID000003826 | CID000003869 |
| CID000003878 | CID000003883 | CID000003899 | CID000003902 | CID000003911 |
| CID000003928 | CID000003929 | CID000003937 | CID000003948 | CID000003958 |
| CID000003961 | CID000003962 | CID000004033 | CID000004044 | CID000004046 |
| CID000004054 | CID000004064 | CID000004075 | CID000004107 | CID000004121 |
| CID000004158 | CID000004159 | CID000004170 | CID000004171 | CID000004173 |
| CID000004192 | CID000004200 | CID000004205 | CID000004211 | CID000004236 |
| CID000004253 | CID000004259 | CID000004409 | CID000004419 | CID000004421 |



CID000004440 CID000004449 CID000004473 CID000004485 CID000004509  
 CID000004510 CID000004539 CID000004542 CID000004583 CID000004585  
 CID000004594 CID000004603 CID000004609 CID000004614 CID000004616  
 CID000004635 CID000004666 CID000004679 CID000004691 CID000004739  
 CID000004745 CID000004828 CID000004856 CID000004870 CID000004885  
 CID000004889 CID000004891 CID000004893 CID000004894 CID000004900  
 CID000004909 CID000004920 CID000004932 CID000004946 CID000004991  
 CID000005002 CID000005005 CID000005029 CID000005035 CID000005038  
 CID000005039 CID000005064 CID000005070 CID000005073 CID000005076  
 CID000005077 CID000005078 CID000005090 CID000005095 CID000005195  
 CID000005203 CID000005210 CID000005212 CID000005215 CID000005245  
 CID000005253 CID000005291 CID000005297 CID000005344 CID000005352  
 CID000005358 CID000005372 CID000005379 CID000005391 CID000005394  
 CID000005401 CID000005408 CID000005426 CID000005466 CID000005478  
 CID000005479 CID000005487 CID000005496 CID000005503 CID000005512  
 CID000005514 CID000005516 CID000005523 CID000005525 CID000005533  
 CID000005544 CID000005625 CID000005645 CID000005650 CID000005651  
 CID000005656 CID000005665 CID000005672 CID000005718 CID000005719  
 CID000005726 CID000005731 CID000005732 CID000005734 CID000005735  
 CID000005978 CID000010631 CID000013342 CID000014888 CID000027661  
 CID000027686 CID000028112 CID000031378 CID000034312 CID000039860  
 CID000042615 CID000051634 CID000054454 CID000054547 CID000054688  
 CID000056959 CID000057537 CID000059708 CID000060184 CID000060613  
 CID000060787 CID000060795 CID000060852 CID000060953 CID000062816  
 CID000062959 CID000064147 CID000065999 CID000068740 CID000071158  
 CID000071273 CID000071301 CID000071616 CID000072938 CID000077992  
 CID000077993 CID000083786 CID000093860 CID000104741 CID000104865  
 CID000110634 CID000110635 CID000119182 CID000119607 CID000122316  
 CID000123606 CID000125889 CID000130881 CID000147912 CID000150610  
 CID000158440 CID000170361 CID000213039 CID000216326 CID000222786  
 CID000444013 CID000450096 CID000657298 CID001349907 CID003002190  
 CID003062316 CID003081884 CID004659569 CID005229711 CID005281104  
 CID005282044 CID005353980 CID005362420 CID005487301 CID005493444  
 CID006398525 CID006435110

(32)  $S_{32}$  : 331 drug compounds having side effect "Myalgia"

CID000000085 CID000000158 CID000000159 CID000000444 CID000000450  
 CID000000564 CID000000596 CID000000598 CID000000738 CID000000937  
 CID000000942 CID000001046 CID000001065 CID000001134 CID000001546  
 CID000001690 CID000001775 CID000001935 CID000001971 CID000001972  
 CID000001978 CID000002022 CID000002083 CID000002088 CID000002099  
 CID000002118 CID000002145 CID000002162 CID000002182 CID000002187  
 CID000002216 CID000002250 CID000002265 CID000002267 CID000002269  
 CID000002284 CID000002311 CID000002349 CID000002369 CID000002375

|              |              |              |              |              |
|--------------|--------------|--------------|--------------|--------------|
| CID000002405 | CID000002435 | CID000002462 | CID000002478 | CID000002520 |
| CID000002524 | CID000002541 | CID000002550 | CID000002554 | CID000002578 |
| CID000002585 | CID000002609 | CID000002662 | CID000002676 | CID000002678 |
| CID000002713 | CID000002751 | CID000002756 | CID000002764 | CID000002769 |
| CID000002771 | CID000002786 | CID000002800 | CID000002801 | CID000002802 |
| CID000002806 | CID000002818 | CID000002891 | CID000002895 | CID000002909 |
| CID000002951 | CID000002958 | CID000002973 | CID000002978 | CID000003032 |
| CID000003040 | CID000003043 | CID000003066 | CID000003075 | CID000003108 |
| CID000003121 | CID000003143 | CID000003148 | CID000003152 | CID000003157 |
| CID000003161 | CID000003203 | CID000003222 | CID000003251 | CID000003261 |
| CID000003285 | CID000003325 | CID000003333 | CID000003339 | CID000003345 |
| CID000003348 | CID000003355 | CID000003365 | CID000003367 | CID000003379 |
| CID000003385 | CID000003394 | CID000003403 | CID000003404 | CID000003410 |
| CID000003414 | CID000003417 | CID000003419 | CID000003446 | CID000003449 |
| CID000003454 | CID000003461 | CID000003463 | CID000003475 | CID000003478 |
| CID000003488 | CID000003518 | CID000003519 | CID000003648 | CID000003702 |
| CID000003749 | CID000003793 | CID000003825 | CID000003826 | CID000003877 |
| CID000003878 | CID000003883 | CID000003899 | CID000003902 | CID000003911 |
| CID000003937 | CID000003948 | CID000003961 | CID000003962 | CID000004046 |
| CID000004053 | CID000004075 | CID000004091 | CID000004112 | CID000004138 |
| CID000004158 | CID000004163 | CID000004200 | CID000004205 | CID000004212 |
| CID000004236 | CID000004259 | CID000004428 | CID000004440 | CID000004449 |
| CID000004451 | CID000004463 | CID000004473 | CID000004485 | CID000004497 |
| CID000004509 | CID000004513 | CID000004539 | CID000004542 | CID000004583 |
| CID000004585 | CID000004594 | CID000004599 | CID000004607 | CID000004609 |
| CID000004635 | CID000004666 | CID000004679 | CID000004739 | CID000004740 |
| CID000004745 | CID000004819 | CID000004828 | CID000004829 | CID000004885 |
| CID000004889 | CID000004891 | CID000004893 | CID000004913 | CID000004915 |
| CID000004920 | CID000004932 | CID000004943 | CID000004991 | CID000005005 |
| CID000005029 | CID000005035 | CID000005038 | CID000005039 | CID000005040 |
| CID000005064 | CID000005070 | CID000005073 | CID000005076 | CID000005077 |
| CID000005078 | CID000005090 | CID000005095 | CID000005152 | CID000005155 |
| CID000005195 | CID000005210 | CID000005212 | CID000005245 | CID000005253 |
| CID000005291 | CID000005314 | CID000005344 | CID000005352 | CID000005358 |
| CID000005372 | CID000005376 | CID000005379 | CID000005394 | CID000005401 |
| CID000005402 | CID000005408 | CID000005426 | CID000005466 | CID000005479 |
| CID000005496 | CID000005514 | CID000005515 | CID000005523 | CID000005525 |
| CID000005538 | CID000005544 | CID000005625 | CID000005645 | CID000005650 |
| CID000005656 | CID000005672 | CID000005717 | CID000005718 | CID000005719 |
| CID000005726 | CID000005731 | CID000005732 | CID000005734 | CID000005735 |
| CID000005978 | CID000006049 | CID000007029 | CID000010631 | CID000014888 |
| CID000027400 | CID000027661 | CID000027686 | CID000031477 | CID000039042 |
| CID000039860 | CID000040976 | CID000041317 | CID000041781 | CID000042113 |
| CID000042615 | CID000054454 | CID000054547 | CID000054786 | CID000057469 |

|              |              |              |              |              |
|--------------|--------------|--------------|--------------|--------------|
| CID000057537 | CID000059708 | CID000060184 | CID000060198 | CID000060613 |
| CID000060753 | CID000060754 | CID000060787 | CID000060795 | CID000060843 |
| CID000060852 | CID000060877 | CID000060953 | CID000062924 | CID000062959 |
| CID000065027 | CID000065999 | CID000068740 | CID000071158 | CID000071273 |
| CID000071616 | CID000072938 | CID000074989 | CID000077992 | CID000077993 |
| CID000082146 | CID000083786 | CID000093860 | CID000096312 | CID000104741 |
| CID000110634 | CID000110635 | CID000119182 | CID000119607 | CID000123606 |
| CID000123620 | CID000124087 | CID000125889 | CID000130881 | CID000147912 |
| CID000148192 | CID000148211 | CID000150311 | CID000151165 | CID000158440 |
| CID000160051 | CID000170361 | CID000176870 | CID000197712 | CID000213039 |
| CID000216239 | CID000216326 | CID000444013 | CID000657298 | CID001349907 |
| CID003062316 | CID003081884 | CID004183806 | CID004659569 | CID005229711 |
| CID005281007 | CID005281104 | CID005282044 | CID005311297 | CID005329102 |
| CID005361912 | CID005362070 | CID005481350 | CID005487301 | CID006436173 |
| CID009571074 |              |              |              |              |

(33)  $S_{33}$ : 334 drug compounds having side effect "Anxiety"

|              |              |              |              |              |
|--------------|--------------|--------------|--------------|--------------|
| CID000000085 | CID000000159 | CID000000444 | CID000000450 | CID000000596 |
| CID000000598 | CID000000681 | CID000000807 | CID000000838 | CID000000853 |
| CID000000942 | CID000000951 | CID000001690 | CID000001935 | CID000001971 |
| CID000001972 | CID000001978 | CID000002083 | CID000002099 | CID000002130 |
| CID000002131 | CID000002160 | CID000002162 | CID000002171 | CID000002187 |
| CID000002215 | CID000002249 | CID000002267 | CID000002269 | CID000002284 |
| CID000002311 | CID000002349 | CID000002369 | CID000002375 | CID000002405 |
| CID000002431 | CID000002435 | CID000002443 | CID000002462 | CID000002474 |
| CID000002476 | CID000002478 | CID000002487 | CID000002512 | CID000002541 |
| CID000002554 | CID000002578 | CID000002609 | CID000002662 | CID000002676 |
| CID000002678 | CID000002751 | CID000002756 | CID000002762 | CID000002764 |
| CID000002769 | CID000002786 | CID000002800 | CID000002801 | CID000002802 |
| CID000002803 | CID000002806 | CID000002818 | CID000002891 | CID000002895 |
| CID000002909 | CID000002949 | CID000002958 | CID000002978 | CID000002995 |
| CID000003007 | CID000003019 | CID000003032 | CID000003062 | CID000003066 |
| CID000003080 | CID000003108 | CID000003121 | CID000003125 | CID000003148 |
| CID000003152 | CID000003154 | CID000003157 | CID000003161 | CID000003168 |
| CID000003203 | CID000003261 | CID000003285 | CID000003308 | CID000003325 |
| CID000003333 | CID000003339 | CID000003340 | CID000003345 | CID000003355 |
| CID000003373 | CID000003379 | CID000003387 | CID000003394 | CID000003397 |
| CID000003403 | CID000003406 | CID000003410 | CID000003414 | CID000003446 |
| CID000003449 | CID000003454 | CID000003475 | CID000003478 | CID000003510 |
| CID000003519 | CID000003559 | CID000003637 | CID000003648 | CID000003661 |
| CID000003672 | CID000003676 | CID000003696 | CID000003702 | CID000003715 |
| CID000003724 | CID000003736 | CID000003741 | CID000003749 | CID000003793 |
| CID000003821 | CID000003826 | CID000003877 | CID000003878 | CID000003883 |
| CID000003899 | CID000003902 | CID000003911 | CID000003948 | CID000003961 |

|              |              |              |              |              |
|--------------|--------------|--------------|--------------|--------------|
| CID000003962 | CID000004044 | CID000004046 | CID000004054 | CID000004062 |
| CID000004075 | CID000004095 | CID000004158 | CID000004160 | CID000004168 |
| CID000004170 | CID000004171 | CID000004192 | CID000004195 | CID000004196 |
| CID000004205 | CID000004212 | CID000004236 | CID000004253 | CID000004259 |
| CID000004409 | CID000004419 | CID000004428 | CID000004440 | CID000004449 |
| CID000004451 | CID000004473 | CID000004485 | CID000004493 | CID000004513 |
| CID000004539 | CID000004542 | CID000004543 | CID000004583 | CID000004585 |
| CID000004594 | CID000004595 | CID000004599 | CID000004603 | CID000004609 |
| CID000004614 | CID000004634 | CID000004635 | CID000004679 | CID000004727 |
| CID000004737 | CID000004739 | CID000004740 | CID000004745 | CID000004819 |
| CID000004828 | CID000004845 | CID000004856 | CID000004885 | CID000004889 |
| CID000004893 | CID000004914 | CID000004920 | CID000004932 | CID000004943 |
| CID000004946 | CID000004976 | CID000005002 | CID000005005 | CID000005029 |
| CID000005038 | CID000005040 | CID000005052 | CID000005064 | CID000005070 |
| CID000005071 | CID000005073 | CID000005076 | CID000005077 | CID000005078 |
| CID000005090 | CID000005095 | CID000005152 | CID000005193 | CID000005195 |
| CID000005210 | CID000005212 | CID000005245 | CID000005253 | CID000005291 |
| CID000005344 | CID000005358 | CID000005372 | CID000005376 | CID000005379 |
| CID000005391 | CID000005394 | CID000005401 | CID000005403 | CID000005408 |
| CID000005426 | CID000005466 | CID000005478 | CID000005487 | CID000005512 |
| CID000005514 | CID000005523 | CID000005525 | CID000005530 | CID000005538 |
| CID000005556 | CID000005584 | CID000005625 | CID000005650 | CID000005665 |
| CID000005718 | CID000005719 | CID000005721 | CID000005726 | CID000005731 |
| CID000005732 | CID000005734 | CID000005735 | CID000007029 | CID000008612 |
| CID000009034 | CID000010631 | CID000014888 | CID000018140 | CID000027661 |
| CID000027686 | CID000031477 | CID000034312 | CID000039860 | CID000040976 |
| CID000041317 | CID000042615 | CID000047725 | CID000054454 | CID000054547 |
| CID000054688 | CID000054786 | CID000057469 | CID000057537 | CID000059708 |
| CID000059768 | CID000060184 | CID000060198 | CID000060613 | CID000060714 |
| CID000060754 | CID000060787 | CID000060795 | CID000062816 | CID000062819 |
| CID000062867 | CID000062924 | CID000062959 | CID000064147 | CID000065999 |
| CID000068740 | CID000071158 | CID000071273 | CID000071329 | CID000071616 |
| CID000074989 | CID000077992 | CID000077993 | CID000093860 | CID000104741 |
| CID000104865 | CID000110634 | CID000115237 | CID000119182 | CID000119607 |
| CID000122316 | CID000123606 | CID000125017 | CID000125889 | CID000147912 |
| CID000148192 | CID000148211 | CID000150610 | CID000151165 | CID000158440 |
| CID000163742 | CID000170361 | CID000176870 | CID000213039 | CID000216326 |
| CID000444013 | CID000477468 | CID003002190 | CID003062316 | CID003081884 |
| CID004183806 | CID004659568 | CID004659569 | CID005229711 | CID005282226 |
| CID005311027 | CID005311297 | CID005481350 | CID005493381 |              |

(34)  $S_{34}$ : 328 drug compounds having side effect “Syncope”

|              |              |              |              |              |
|--------------|--------------|--------------|--------------|--------------|
| CID000000158 | CID000000159 | CID000000206 | CID000000214 | CID000000444 |
| CID000000450 | CID000000564 | CID000000581 | CID000000596 | CID000000767 |

|              |              |              |              |              |
|--------------|--------------|--------------|--------------|--------------|
| CID00000807  | CID00000937  | CID000001003 | CID000001065 | CID000001775 |
| CID000001935 | CID000001972 | CID000001978 | CID000002083 | CID000002092 |
| CID000002140 | CID000002141 | CID000002160 | CID000002162 | CID000002170 |
| CID000002182 | CID000002249 | CID000002250 | CID000002269 | CID000002284 |
| CID000002311 | CID000002349 | CID000002369 | CID000002375 | CID000002405 |
| CID000002431 | CID000002435 | CID000002443 | CID000002462 | CID000002474 |
| CID000002477 | CID000002487 | CID000002512 | CID000002520 | CID000002541 |
| CID000002550 | CID000002554 | CID000002576 | CID000002583 | CID000002585 |
| CID000002609 | CID000002662 | CID000002678 | CID000002712 | CID000002726 |
| CID000002751 | CID000002764 | CID000002771 | CID000002800 | CID000002801 |
| CID000002803 | CID000002806 | CID000002818 | CID000002895 | CID000002913 |
| CID000002949 | CID000002958 | CID000003003 | CID000003007 | CID000003015 |
| CID000003016 | CID000003032 | CID000003042 | CID000003059 | CID000003075 |
| CID000003108 | CID000003114 | CID000003143 | CID000003148 | CID000003152 |
| CID000003154 | CID000003157 | CID000003168 | CID000003203 | CID000003222 |
| CID000003261 | CID000003285 | CID000003308 | CID000003325 | CID000003333 |
| CID000003345 | CID000003355 | CID000003379 | CID000003386 | CID000003393 |
| CID000003394 | CID000003404 | CID000003419 | CID000003446 | CID000003449 |
| CID000003463 | CID000003478 | CID000003510 | CID000003518 | CID000003519 |
| CID000003640 | CID000003648 | CID000003661 | CID000003672 | CID000003676 |
| CID000003696 | CID000003702 | CID000003715 | CID000003724 | CID000003730 |
| CID000003734 | CID000003736 | CID000003737 | CID000003741 | CID000003742 |
| CID000003749 | CID000003750 | CID000003759 | CID000003780 | CID000003784 |
| CID000003793 | CID000003826 | CID000003827 | CID000003869 | CID000003878 |
| CID000003883 | CID000003911 | CID000003914 | CID000003937 | CID000003948 |
| CID000003961 | CID000003964 | CID000004011 | CID000004032 | CID000004044 |
| CID000004046 | CID000004054 | CID000004058 | CID000004062 | CID000004064 |
| CID000004078 | CID000004086 | CID000004091 | CID000004095 | CID000004107 |
| CID000004158 | CID000004170 | CID000004171 | CID000004173 | CID000004178 |
| CID000004196 | CID000004200 | CID000004205 | CID000004236 | CID000004253 |
| CID000004259 | CID000004409 | CID000004419 | CID000004428 | CID000004440 |
| CID000004449 | CID000004473 | CID000004485 | CID000004493 | CID000004506 |
| CID000004510 | CID000004542 | CID000004583 | CID000004585 | CID000004594 |
| CID000004595 | CID000004609 | CID000004614 | CID000004616 | CID000004634 |
| CID000004635 | CID000004666 | CID000004679 | CID000004691 | CID000004736 |
| CID000004737 | CID000004739 | CID000004745 | CID000004748 | CID000004775 |
| CID000004819 | CID000004828 | CID000004845 | CID000004856 | CID000004885 |
| CID000004893 | CID000004894 | CID000004914 | CID000004915 | CID000004920 |
| CID000004927 | CID000004932 | CID000004943 | CID000005002 | CID000005005 |
| CID000005029 | CID000005035 | CID000005038 | CID000005040 | CID000005052 |
| CID000005070 | CID000005071 | CID000005073 | CID000005076 | CID000005077 |
| CID000005078 | CID000005090 | CID000005095 | CID000005193 | CID000005195 |
| CID000005203 | CID000005206 | CID000005210 | CID000005212 | CID000005245 |
| CID000005253 | CID000005291 | CID000005344 | CID000005352 | CID000005358 |

|              |              |              |              |              |
|--------------|--------------|--------------|--------------|--------------|
| CID000005372 | CID000005379 | CID000005401 | CID000005426 | CID000005454 |
| CID000005466 | CID000005478 | CID000005487 | CID000005514 | CID000005523 |
| CID000005525 | CID000005533 | CID000005538 | CID000005544 | CID000005556 |
| CID000005591 | CID000005596 | CID000005625 | CID000005645 | CID000005650 |
| CID000005656 | CID000005718 | CID000005719 | CID000005721 | CID000005726 |
| CID000005731 | CID000005732 | CID000005734 | CID000005746 | CID000006691 |
| CID000008612 | CID000010631 | CID000016850 | CID000027661 | CID000028112 |
| CID000034312 | CID000039860 | CID000041781 | CID000042615 | CID000054547 |
| CID000054786 | CID000056959 | CID000057469 | CID000057537 | CID000059768 |
| CID000060184 | CID000060613 | CID000060714 | CID000060753 | CID000060754 |
| CID000060787 | CID000060953 | CID000062867 | CID000062959 | CID000065999 |
| CID000068740 | CID000071158 | CID000071273 | CID000071301 | CID000071329 |
| CID000071616 | CID000072938 | CID000077992 | CID000077993 | CID000082146 |
| CID000093860 | CID000104865 | CID000110634 | CID000110635 | CID000115237 |
| CID000119607 | CID000122316 | CID000123606 | CID000125017 | CID000125889 |
| CID000147912 | CID000148192 | CID000150610 | CID000151165 | CID000158440 |
| CID000170361 | CID000176870 | CID000216239 | CID000216326 | CID000444013 |
| CID003002190 | CID003062316 | CID003081884 | CID004183806 | CID004659568 |
| CID004659569 | CID005229711 | CID005281104 | CID005282044 | CID005311181 |
| CID005362420 | CID005487301 | CID006436173 |              |              |

(35)  $S_{35}$ : 325 drug compounds having side effect "Hypertension"

|              |              |              |              |              |
|--------------|--------------|--------------|--------------|--------------|
| CID000000085 | CID000000158 | CID000000191 | CID000000214 | CID000000444 |
| CID000000453 | CID000000564 | CID000000596 | CID000000598 | CID000000681 |
| CID000000807 | CID000000838 | CID000000861 | CID000000942 | CID000000951 |
| CID000001690 | CID000001775 | CID000001935 | CID000001972 | CID000002022 |
| CID000002083 | CID000002130 | CID000002140 | CID000002141 | CID000002160 |
| CID000002170 | CID000002182 | CID000002187 | CID000002267 | CID000002269 |
| CID000002284 | CID000002349 | CID000002375 | CID000002431 | CID000002435 |
| CID000002443 | CID000002462 | CID000002474 | CID000002476 | CID000002477 |
| CID000002478 | CID000002487 | CID000002524 | CID000002554 | CID000002578 |
| CID000002662 | CID000002676 | CID000002678 | CID000002713 | CID000002764 |
| CID000002771 | CID000002786 | CID000002800 | CID000002806 | CID000002818 |
| CID000002895 | CID000002909 | CID000002958 | CID000002995 | CID000003003 |
| CID000003007 | CID000003032 | CID000003066 | CID000003105 | CID000003108 |
| CID000003121 | CID000003143 | CID000003148 | CID000003152 | CID000003154 |
| CID000003158 | CID000003161 | CID000003168 | CID000003203 | CID000003249 |
| CID000003285 | CID000003308 | CID000003310 | CID000003339 | CID000003345 |
| CID000003355 | CID000003372 | CID000003373 | CID000003379 | CID000003386 |
| CID000003394 | CID000003397 | CID000003404 | CID000003410 | CID000003414 |
| CID000003446 | CID000003449 | CID000003454 | CID000003461 | CID000003467 |
| CID000003475 | CID000003478 | CID000003494 | CID000003510 | CID000003559 |
| CID000003640 | CID000003648 | CID000003672 | CID000003676 | CID000003690 |
| CID000003696 | CID000003715 | CID000003724 | CID000003730 | CID000003734 |

|              |              |              |              |              |
|--------------|--------------|--------------|--------------|--------------|
| CID000003736 | CID000003737 | CID000003741 | CID000003746 | CID000003750 |
| CID000003779 | CID000003780 | CID000003793 | CID000003825 | CID000003826 |
| CID000003827 | CID000003878 | CID000003883 | CID000003899 | CID000003902 |
| CID000003911 | CID000003929 | CID000003948 | CID000003958 | CID000003964 |
| CID000004011 | CID000004044 | CID000004046 | CID000004054 | CID000004062 |
| CID000004075 | CID000004086 | CID000004091 | CID000004140 | CID000004158 |
| CID000004159 | CID000004168 | CID000004173 | CID000004178 | CID000004195 |
| CID000004200 | CID000004205 | CID000004211 | CID000004212 | CID000004236 |
| CID000004253 | CID000004259 | CID000004409 | CID000004419 | CID000004425 |
| CID000004436 | CID000004449 | CID000004493 | CID000004497 | CID000004542 |
| CID000004543 | CID000004547 | CID000004583 | CID000004585 | CID000004594 |
| CID000004609 | CID000004614 | CID000004634 | CID000004679 | CID000004691 |
| CID000004736 | CID000004739 | CID000004740 | CID000004745 | CID000004748 |
| CID000004819 | CID000004829 | CID000004856 | CID000004885 | CID000004894 |
| CID000004900 | CID000004914 | CID000004915 | CID000004920 | CID000004932 |
| CID000004943 | CID000004976 | CID000005002 | CID000005029 | CID000005040 |
| CID000005070 | CID000005071 | CID000005073 | CID000005076 | CID000005077 |
| CID000005078 | CID000005090 | CID000005095 | CID000005152 | CID000005195 |
| CID000005203 | CID000005206 | CID000005245 | CID000005291 | CID000005314 |
| CID000005344 | CID000005352 | CID000005358 | CID000005372 | CID000005376 |
| CID000005379 | CID000005394 | CID000005396 | CID000005408 | CID000005412 |
| CID000005426 | CID000005466 | CID000005486 | CID000005504 | CID000005514 |
| CID000005523 | CID000005533 | CID000005538 | CID000005544 | CID000005584 |
| CID000005625 | CID000005636 | CID000005645 | CID000005647 | CID000005656 |
| CID000005672 | CID000005718 | CID000005719 | CID000005731 | CID000005732 |
| CID000005734 | CID000005735 | CID000005746 | CID000005775 | CID000005978 |
| CID000006058 | CID000013342 | CID000014888 | CID000018140 | CID000019090 |
| CID000027661 | CID000027991 | CID000031378 | CID000031477 | CID000032800 |
| CID000034312 | CID000036339 | CID000038904 | CID000039860 | CID000040976 |
| CID000041317 | CID000041693 | CID000042113 | CID000047725 | CID000051263 |
| CID000054547 | CID000057469 | CID000057537 | CID000060198 | CID000060612 |
| CID000060613 | CID000060714 | CID000060753 | CID000060787 | CID000060795 |
| CID000060843 | CID000060852 | CID000060871 | CID000060953 | CID000062819 |
| CID000062924 | CID000062959 | CID000064147 | CID000068740 | CID000071158 |
| CID000071273 | CID000071329 | CID000071616 | CID000072054 | CID000077993 |
| CID000077999 | CID000082146 | CID000093860 | CID000110634 | CID000110635 |
| CID000119182 | CID000119607 | CID000123606 | CID000125889 | CID000147912 |
| CID000148192 | CID000148211 | CID000150610 | CID000151165 | CID000158440 |
| CID000163742 | CID000166548 | CID000170361 | CID000213039 | CID000216239 |
| CID000216326 | CID000222786 | CID000444013 | CID000444033 | CID000477468 |
| CID003062316 | CID003081884 | CID004183806 | CID004659568 | CID004659569 |
| CID005229711 | CID005281104 | CID005282044 | CID005282226 | CID005311027 |
| CID005329102 | CID005362420 | CID005473385 | CID006323497 | CID006398970 |

(36)  $S_{36}$ : 326 drug compounds having side effect "Anemia"

|              |              |              |              |              |
|--------------|--------------|--------------|--------------|--------------|
| CID000000085 | CID000000159 | CID000000214 | CID000000298 | CID000000444 |
| CID000000596 | CID000000598 | CID000000772 | CID000001775 | CID000001935 |
| CID000001971 | CID000001972 | CID000002022 | CID000002088 | CID000002140 |
| CID000002142 | CID000002145 | CID000002156 | CID000002171 | CID000002173 |
| CID000002179 | CID000002182 | CID000002187 | CID000002244 | CID000002250 |
| CID000002269 | CID000002274 | CID000002284 | CID000002369 | CID000002375 |
| CID000002462 | CID000002478 | CID000002541 | CID000002550 | CID000002554 |
| CID000002559 | CID000002575 | CID000002578 | CID000002585 | CID000002617 |
| CID000002622 | CID000002637 | CID000002650 | CID000002655 | CID000002656 |
| CID000002662 | CID000002676 | CID000002708 | CID000002726 | CID000002751 |
| CID000002756 | CID000002764 | CID000002769 | CID000002771 | CID000002786 |
| CID000002794 | CID000002801 | CID000002802 | CID000002806 | CID000002818 |
| CID000002907 | CID000002909 | CID000002951 | CID000003015 | CID000003016 |
| CID000003032 | CID000003043 | CID000003075 | CID000003100 | CID000003121 |
| CID000003125 | CID000003143 | CID000003148 | CID000003152 | CID000003161 |
| CID000003203 | CID000003222 | CID000003249 | CID000003305 | CID000003308 |
| CID000003310 | CID000003324 | CID000003325 | CID000003333 | CID000003339 |
| CID000003342 | CID000003345 | CID000003365 | CID000003366 | CID000003367 |
| CID000003385 | CID000003386 | CID000003394 | CID000003397 | CID000003404 |
| CID000003406 | CID000003414 | CID000003419 | CID000003440 | CID000003446 |
| CID000003449 | CID000003454 | CID000003461 | CID000003463 | CID000003467 |
| CID000003475 | CID000003476 | CID000003478 | CID000003488 | CID000003510 |
| CID000003518 | CID000003559 | CID000003648 | CID000003652 | CID000003657 |
| CID000003672 | CID000003685 | CID000003690 | CID000003702 | CID000003706 |
| CID000003715 | CID000003749 | CID000003750 | CID000003825 | CID000003826 |
| CID000003877 | CID000003878 | CID000003883 | CID000003899 | CID000003929 |
| CID000003937 | CID000003948 | CID000003950 | CID000003961 | CID000004044 |
| CID000004053 | CID000004054 | CID000004060 | CID000004075 | CID000004078 |
| CID000004112 | CID000004158 | CID000004170 | CID000004196 | CID000004205 |
| CID000004212 | CID000004236 | CID000004253 | CID000004259 | CID000004409 |
| CID000004440 | CID000004449 | CID000004451 | CID000004463 | CID000004485 |
| CID000004493 | CID000004497 | CID000004509 | CID000004513 | CID000004542 |
| CID000004583 | CID000004585 | CID000004594 | CID000004603 | CID000004609 |
| CID000004614 | CID000004635 | CID000004666 | CID000004679 | CID000004691 |
| CID000004740 | CID000004745 | CID000004775 | CID000004829 | CID000004856 |
| CID000004885 | CID000004889 | CID000004909 | CID000004911 | CID000004915 |
| CID000004920 | CID000004932 | CID000004943 | CID000005002 | CID000005005 |
| CID000005029 | CID000005039 | CID000005040 | CID000005064 | CID000005070 |
| CID000005073 | CID000005076 | CID000005077 | CID000005095 | CID000005155 |
| CID000005195 | CID000005203 | CID000005210 | CID000005212 | CID000005245 |
| CID000005291 | CID000005300 | CID000005342 | CID000005344 | CID000005352 |
| CID000005358 | CID000005372 | CID000005376 | CID000005394 | CID000005396 |
| CID000005402 | CID000005408 | CID000005412 | CID000005426 | CID000005452 |



|              |              |              |              |              |
|--------------|--------------|--------------|--------------|--------------|
| CID000005466 | CID000005487 | CID000005496 | CID000005514 | CID000005515 |
| CID000005523 | CID000005525 | CID000005530 | CID000005533 | CID000005538 |
| CID000005578 | CID000005582 | CID000005591 | CID000005625 | CID000005645 |
| CID000005656 | CID000005672 | CID000005718 | CID000005719 | CID000005726 |
| CID000005732 | CID000005734 | CID000005735 | CID000005746 | CID000005978 |
| CID000006049 | CID000006058 | CID000006691 | CID000010631 | CID000013342 |
| CID000014888 | CID000016362 | CID000018140 | CID000019090 | CID000025419 |
| CID000027661 | CID000027686 | CID000030623 | CID000038904 | CID000039042 |
| CID000039860 | CID000047725 | CID000054454 | CID000054547 | CID000054688 |
| CID000054786 | CID000060184 | CID000060612 | CID000060613 | CID000060787 |
| CID000060795 | CID000060843 | CID000060877 | CID000060953 | CID000062867 |
| CID000062959 | CID000064147 | CID000065027 | CID000065999 | CID000068740 |
| CID000071158 | CID000071273 | CID000071616 | CID000072938 | CID000074989 |
| CID000077993 | CID000077999 | CID000082146 | CID000083786 | CID000093860 |
| CID000096312 | CID000104741 | CID000104758 | CID000104865 | CID000119182 |
| CID000119607 | CID000122316 | CID000123631 | CID000125889 | CID000130881 |
| CID000147912 | CID000148211 | CID000150610 | CID000151165 | CID000163742 |
| CID000170361 | CID000197712 | CID000213039 | CID000216239 | CID000477468 |
| CID000667490 | CID003002190 | CID003062316 | CID003081884 | CID004183806 |
| CID004659569 | CID005281104 | CID005282044 | CID005329102 | CID005353980 |
| CID005361912 | CID005362070 | CID005362420 | CID005381226 | CID005481350 |
| CID005493381 | CID005493444 | CID006323497 | CID006398970 | CID006435110 |
| CID006918453 |              |              |              |              |

(37)  $S_{37}$  : 322 drug compounds having side effect "Chest pain"

|              |              |              |              |              |
|--------------|--------------|--------------|--------------|--------------|
| CID000000085 | CID000000158 | CID000000159 | CID000000191 | CID000000444 |
| CID000000450 | CID000000453 | CID000000596 | CID000000598 | CID000000738 |
| CID000000807 | CID000001065 | CID000001134 | CID000001935 | CID000001972 |
| CID000001978 | CID000002022 | CID000002083 | CID000002092 | CID000002140 |
| CID000002141 | CID000002162 | CID000002182 | CID000002187 | CID000002215 |
| CID000002216 | CID000002232 | CID000002249 | CID000002250 | CID000002267 |
| CID000002269 | CID000002274 | CID000002284 | CID000002311 | CID000002369 |
| CID000002375 | CID000002405 | CID000002435 | CID000002462 | CID000002471 |
| CID000002477 | CID000002478 | CID000002487 | CID000002520 | CID000002541 |
| CID000002550 | CID000002554 | CID000002578 | CID000002585 | CID000002609 |
| CID000002658 | CID000002662 | CID000002676 | CID000002678 | CID000002751 |
| CID000002764 | CID000002769 | CID000002771 | CID000002800 | CID000002801 |
| CID000002803 | CID000002806 | CID000002818 | CID000002895 | CID000002909 |
| CID000002958 | CID000003007 | CID000003032 | CID000003059 | CID000003075 |
| CID000003108 | CID000003114 | CID000003121 | CID000003143 | CID000003148 |
| CID000003152 | CID000003154 | CID000003156 | CID000003157 | CID000003203 |
| CID000003222 | CID000003255 | CID000003261 | CID000003285 | CID000003292 |
| CID000003333 | CID000003339 | CID000003340 | CID000003345 | CID000003355 |
| CID000003366 | CID000003373 | CID000003379 | CID000003385 | CID000003393 |

|              |              |              |              |              |
|--------------|--------------|--------------|--------------|--------------|
| CID000003403 | CID000003404 | CID000003410 | CID000003414 | CID000003419 |
| CID000003446 | CID000003449 | CID000003454 | CID000003461 | CID000003463 |
| CID000003475 | CID000003510 | CID000003518 | CID000003519 | CID000003648 |
| CID000003661 | CID000003698 | CID000003702 | CID000003715 | CID000003724 |
| CID000003734 | CID000003736 | CID000003741 | CID000003746 | CID000003749 |
| CID000003783 | CID000003784 | CID000003793 | CID000003826 | CID000003878 |
| CID000003883 | CID000003890 | CID000003899 | CID000003902 | CID000003914 |
| CID000003937 | CID000003948 | CID000003961 | CID000003962 | CID000004046 |
| CID000004053 | CID000004054 | CID000004075 | CID000004086 | CID000004091 |
| CID000004112 | CID000004140 | CID000004158 | CID000004163 | CID000004170 |
| CID000004171 | CID000004173 | CID000004178 | CID000004197 | CID000004205 |
| CID000004212 | CID000004236 | CID000004253 | CID000004259 | CID000004428 |
| CID000004449 | CID000004473 | CID000004485 | CID000004493 | CID000004509 |
| CID000004513 | CID000004539 | CID000004542 | CID000004547 | CID000004583 |
| CID000004585 | CID000004594 | CID000004595 | CID000004609 | CID000004634 |
| CID000004635 | CID000004666 | CID000004679 | CID000004739 | CID000004740 |
| CID000004745 | CID000004819 | CID000004828 | CID000004829 | CID000004845 |
| CID000004885 | CID000004889 | CID000004893 | CID000004920 | CID000004932 |
| CID000004943 | CID000005002 | CID000005005 | CID000005035 | CID000005038 |
| CID000005039 | CID000005040 | CID000005064 | CID000005070 | CID000005073 |
| CID000005076 | CID000005077 | CID000005078 | CID000005090 | CID000005095 |
| CID000005152 | CID000005195 | CID000005210 | CID000005212 | CID000005234 |
| CID000005245 | CID000005253 | CID000005291 | CID000005352 | CID000005358 |
| CID000005372 | CID000005376 | CID000005379 | CID000005401 | CID000005466 |
| CID000005478 | CID000005496 | CID000005508 | CID000005512 | CID000005514 |
| CID000005515 | CID000005523 | CID000005525 | CID000005533 | CID000005538 |
| CID000005556 | CID000005596 | CID000005625 | CID000005645 | CID000005650 |
| CID000005665 | CID000005672 | CID000005719 | CID000005726 | CID000005731 |
| CID000005732 | CID000005734 | CID000005735 | CID000006691 | CID000010631 |
| CID000014888 | CID000018140 | CID000019090 | CID000027661 | CID000027686 |
| CID000027991 | CID000034312 | CID000036811 | CID000039860 | CID000041317 |
| CID000041744 | CID000041781 | CID000050294 | CID000054547 | CID000054688 |
| CID000054786 | CID000057469 | CID000059708 | CID000059768 | CID000060184 |
| CID000060198 | CID000060613 | CID000060714 | CID000060753 | CID000060754 |
| CID000060787 | CID000060795 | CID000060843 | CID000060953 | CID000062816 |
| CID000062819 | CID000062959 | CID000065999 | CID000068740 | CID000068844 |
| CID000071158 | CID000071273 | CID000071301 | CID000071329 | CID000071616 |
| CID000077992 | CID000082146 | CID000096312 | CID000104741 | CID000104865 |
| CID000110634 | CID000110635 | CID000119607 | CID000122316 | CID000123606 |
| CID000123620 | CID000125889 | CID000130881 | CID000147912 | CID000148192 |
| CID000150311 | CID000150610 | CID000158440 | CID000163742 | CID000170361 |
| CID000197712 | CID000216326 | CID000444013 | CID000444033 | CID000450096 |
| CID003062316 | CID003081884 | CID003086672 | CID004183806 | CID004659569 |
| CID005229711 | CID005281104 | CID005282044 | CID005282226 | CID005311027 |

CID005311181 CID005361912 CID005362420 CID005481350 CID005487301  
CID006398970 CID006436173

(38)  $S_{38}$ : 299 drug compounds having side effect "Infection"

CID000000085 CID000000143 CID000000159 CID000000206 CID000000214  
CID000000444 CID000000450 CID000000453 CID000000596 CID000000738  
CID000000767 CID000000807 CID000001546 CID000001690 CID000001775  
CID000001935 CID000002083 CID000002088 CID000002092 CID000002099  
CID000002118 CID000002153 CID000002179 CID000002182 CID000002187  
CID000002232 CID000002250 CID000002265 CID000002267 CID000002284  
CID000002311 CID000002369 CID000002375 CID000002405 CID000002435  
CID000002462 CID000002476 CID000002478 CID000002520 CID000002554  
CID000002578 CID000002585 CID000002662 CID000002678 CID000002708  
CID000002726 CID000002751 CID000002771 CID000002801 CID000002802  
CID000002803 CID000002806 CID000002818 CID000002891 CID000002907  
CID000002909 CID000002958 CID000002973 CID000003000 CID000003003  
CID000003007 CID000003016 CID000003032 CID000003075 CID000003121  
CID000003143 CID000003152 CID000003157 CID000003241 CID000003285  
CID000003305 CID000003308 CID000003310 CID000003325 CID000003333  
CID000003339 CID000003340 CID000003345 CID000003348 CID000003367  
CID000003375 CID000003381 CID000003382 CID000003385 CID000003386  
CID000003392 CID000003394 CID000003403 CID000003404 CID000003410  
CID000003417 CID000003419 CID000003446 CID000003454 CID000003461  
CID000003475 CID000003510 CID000003553 CID000003640 CID000003648  
CID000003657 CID000003672 CID000003676 CID000003685 CID000003690  
CID000003702 CID000003715 CID000003737 CID000003746 CID000003749  
CID000003750 CID000003825 CID000003826 CID000003827 CID000003878  
CID000003890 CID000003899 CID000003902 CID000003911 CID000003937  
CID000003958 CID000003961 CID000003962 CID000004033 CID000004044  
CID000004053 CID000004075 CID000004091 CID000004112 CID000004114  
CID000004158 CID000004159 CID000004196 CID000004201 CID000004205  
CID000004212 CID000004236 CID000004253 CID000004428 CID000004440  
CID000004449 CID000004473 CID000004510 CID000004513 CID000004599  
CID000004609 CID000004614 CID000004634 CID000004635 CID000004666  
CID000004679 CID000004691 CID000004739 CID000004740 CID000004745  
CID000004748 CID000004819 CID000004856 CID000004873 CID000004885  
CID000004889 CID000004894 CID000004915 CID000004917 CID000004920  
CID000004932 CID000005002 CID000005035 CID000005040 CID000005070  
CID000005073 CID000005077 CID000005090 CID000005095 CID000005152  
CID000005195 CID000005210 CID000005212 CID000005234 CID000005245  
CID000005253 CID000005291 CID000005320 CID000005358 CID000005372  
CID000005376 CID000005394 CID000005396 CID000005408 CID000005426  
CID000005453 CID000005466 CID000005478 CID000005487 CID000005512  
CID000005514 CID000005515 CID000005523 CID000005525 CID000005538

|              |              |              |              |              |
|--------------|--------------|--------------|--------------|--------------|
| CID000005544 | CID000005596 | CID000005645 | CID000005656 | CID000005672 |
| CID000005717 | CID000005718 | CID000005721 | CID000005731 | CID000005732 |
| CID000005735 | CID000006503 | CID000010631 | CID000012536 | CID000014888 |
| CID000019090 | CID000025419 | CID000025517 | CID000027661 | CID000027686 |
| CID000027991 | CID000028112 | CID000030623 | CID000031378 | CID000032797 |
| CID000034312 | CID000038904 | CID000039042 | CID000039860 | CID000040976 |
| CID000041317 | CID000042615 | CID000047725 | CID000048175 | CID000052421 |
| CID000054454 | CID000057469 | CID000059708 | CID000060184 | CID000060198 |
| CID000060612 | CID000060787 | CID000060795 | CID000060843 | CID000060852 |
| CID000060865 | CID000060953 | CID000062819 | CID000062924 | CID000064147 |
| CID000065999 | CID000068740 | CID000071158 | CID000071273 | CID000071329 |
| CID000074989 | CID000077993 | CID000082146 | CID000093860 | CID000096312 |
| CID000104758 | CID000104865 | CID000115237 | CID000119182 | CID000119607 |
| CID000122316 | CID000123620 | CID000123631 | CID000124087 | CID000125889 |
| CID000130881 | CID000145068 | CID000148211 | CID000150311 | CID000151165 |
| CID000158440 | CID000160051 | CID000163742 | CID000170361 | CID000176870 |
| CID000197712 | CID000216239 | CID000216326 | CID000444033 | CID003062316 |
| CID003081884 | CID004183806 | CID004630253 | CID004659569 | CID005281104 |
| CID005282226 | CID005311027 | CID005311297 | CID005329102 | CID005362070 |
| CID005487301 | CID005493381 | CID006436173 | CID006447131 |              |

(39)  $S_{39}$ : 302 drug compounds having side effect "Palpitations"

|              |              |              |              |              |
|--------------|--------------|--------------|--------------|--------------|
| CID000000085 | CID000000159 | CID000000191 | CID000000444 | CID000000450 |
| CID000000681 | CID000000838 | CID000000853 | CID000000937 | CID000000942 |
| CID000001065 | CID000001206 | CID000001690 | CID000001775 | CID000001935 |
| CID000001978 | CID000002083 | CID000002160 | CID000002162 | CID000002170 |
| CID000002182 | CID000002216 | CID000002249 | CID000002250 | CID000002267 |
| CID000002269 | CID000002284 | CID000002311 | CID000002349 | CID000002369 |
| CID000002405 | CID000002435 | CID000002441 | CID000002462 | CID000002477 |
| CID000002487 | CID000002512 | CID000002520 | CID000002541 | CID000002550 |
| CID000002564 | CID000002583 | CID000002585 | CID000002609 | CID000002656 |
| CID000002658 | CID000002662 | CID000002678 | CID000002751 | CID000002762 |
| CID000002764 | CID000002769 | CID000002771 | CID000002781 | CID000002800 |
| CID000002801 | CID000002803 | CID000002806 | CID000002818 | CID000002895 |
| CID000002913 | CID000002958 | CID000002978 | CID000002995 | CID000003007 |
| CID000003016 | CID000003019 | CID000003032 | CID000003042 | CID000003059 |
| CID000003062 | CID000003066 | CID000003075 | CID000003100 | CID000003108 |
| CID000003121 | CID000003148 | CID000003151 | CID000003154 | CID000003157 |
| CID000003168 | CID000003203 | CID000003222 | CID000003255 | CID000003261 |
| CID000003285 | CID000003308 | CID000003325 | CID000003333 | CID000003339 |
| CID000003340 | CID000003342 | CID000003345 | CID000003348 | CID000003354 |
| CID000003355 | CID000003373 | CID000003379 | CID000003393 | CID000003394 |
| CID000003404 | CID000003410 | CID000003414 | CID000003419 | CID000003446 |
| CID000003449 | CID000003475 | CID000003476 | CID000003494 | CID000003510 |

CID000003519 CID000003637 CID000003648 CID000003661 CID000003672  
 CID000003696 CID000003702 CID000003715 CID000003746 CID000003759  
 CID000003779 CID000003784 CID000003825 CID000003826 CID000003869  
 CID000003878 CID000003883 CID000003899 CID000003902 CID000003911  
 CID000003914 CID000003937 CID000003957 CID000003961 CID000004011  
 CID000004036 CID000004044 CID000004046 CID000004057 CID000004058  
 CID000004064 CID000004075 CID000004086 CID000004091 CID000004095  
 CID000004140 CID000004158 CID000004170 CID000004171 CID000004173  
 CID000004178 CID000004196 CID000004205 CID000004236 CID000004253  
 CID000004259 CID000004409 CID000004428 CID000004440 CID000004449  
 CID000004473 CID000004485 CID000004493 CID000004497 CID000004506  
 CID000004510 CID000004539 CID000004542 CID000004543 CID000004547  
 CID000004583 CID000004585 CID000004594 CID000004595 CID000004601  
 CID000004614 CID000004635 CID000004679 CID000004740 CID000004745  
 CID000004771 CID000004819 CID000004828 CID000004845 CID000004856  
 CID000004885 CID000004893 CID000004920 CID000004932 CID000004934  
 CID000004976 CID000005002 CID000005005 CID000005029 CID000005038  
 CID000005040 CID000005070 CID000005071 CID000005073 CID000005076  
 CID000005077 CID000005078 CID000005090 CID000005095 CID000005152  
 CID000005195 CID000005210 CID000005212 CID000005253 CID000005344  
 CID000005352 CID000005358 CID000005372 CID000005379 CID000005391  
 CID000005394 CID000005401 CID000005403 CID000005419 CID000005426  
 CID000005466 CID000005478 CID000005479 CID000005512 CID000005514  
 CID000005523 CID000005525 CID000005530 CID000005533 CID000005538  
 CID000005584 CID000005596 CID000005625 CID000005645 CID000005650  
 CID000005718 CID000005719 CID000005731 CID000005732 CID000005734  
 CID000005735 CID000007029 CID000010631 CID000014888 CID000019090  
 CID000020585 CID000027661 CID000027686 CID000027991 CID000031477  
 CID000034312 CID000036811 CID000039860 CID000042615 CID000054547  
 CID000054786 CID000056959 CID000057469 CID000060184 CID000060753  
 CID000060795 CID000062924 CID000062959 CID000065999 CID000071158  
 CID000071329 CID000071616 CID000072054 CID000072938 CID000077992  
 CID000077993 CID000104865 CID000110634 CID000110635 CID000115237  
 CID000119607 CID000123606 CID000124087 CID000125017 CID000125889  
 CID000147912 CID000148192 CID000150311 CID000151165 CID000158440  
 CID000170361 CID000197712 CID000216326 CID000444013 CID000444033  
 CID000450096 CID003002190 CID003062316 CID003081884 CID004659569  
 CID005229711 CID005281104 CID005282044 CID005311027 CID005311181  
 CID005311297 CID011947681

(40)  $S_{40}$  : 308 drug compounds having side effect "Alopecia"

CID000000143 CID000000444 CID000000450 CID000000596 CID000000598  
 CID000000727 CID000000767 CID000000772 CID000000853 CID000000937  
 CID000001148 CID000001690 CID000001935 CID000001972 CID000001978

|              |              |              |              |              |
|--------------|--------------|--------------|--------------|--------------|
| CID000002019 | CID000002022 | CID000002082 | CID000002088 | CID000002099 |
| CID000002123 | CID000002156 | CID000002160 | CID000002162 | CID000002170 |
| CID000002179 | CID000002182 | CID000002187 | CID000002249 | CID000002250 |
| CID000002265 | CID000002284 | CID000002311 | CID000002369 | CID000002375 |
| CID000002405 | CID000002443 | CID000002462 | CID000002477 | CID000002478 |
| CID000002512 | CID000002520 | CID000002550 | CID000002554 | CID000002578 |
| CID000002585 | CID000002662 | CID000002676 | CID000002678 | CID000002708 |
| CID000002719 | CID000002720 | CID000002749 | CID000002751 | CID000002756 |
| CID000002764 | CID000002771 | CID000002800 | CID000002801 | CID000002802 |
| CID000002803 | CID000002895 | CID000002907 | CID000002909 | CID000002949 |
| CID000002958 | CID000002995 | CID000003009 | CID000003015 | CID000003032 |
| CID000003043 | CID000003075 | CID000003108 | CID000003121 | CID000003143 |
| CID000003152 | CID000003154 | CID000003157 | CID000003158 | CID000003203 |
| CID000003222 | CID000003285 | CID000003305 | CID000003308 | CID000003310 |
| CID000003325 | CID000003339 | CID000003342 | CID000003345 | CID000003355 |
| CID000003365 | CID000003367 | CID000003381 | CID000003385 | CID000003386 |
| CID000003387 | CID000003394 | CID000003403 | CID000003404 | CID000003446 |
| CID000003454 | CID000003461 | CID000003463 | CID000003467 | CID000003510 |
| CID000003518 | CID000003519 | CID000003559 | CID000003639 | CID000003648 |
| CID000003652 | CID000003657 | CID000003672 | CID000003685 | CID000003690 |
| CID000003696 | CID000003706 | CID000003715 | CID000003746 | CID000003750 |
| CID000003793 | CID000003823 | CID000003825 | CID000003826 | CID000003869 |
| CID000003877 | CID000003878 | CID000003883 | CID000003899 | CID000003902 |
| CID000003911 | CID000003914 | CID000003937 | CID000003950 | CID000003957 |
| CID000003958 | CID000003961 | CID000003962 | CID000003964 | CID000004011 |
| CID000004033 | CID000004036 | CID000004044 | CID000004046 | CID000004053 |
| CID000004054 | CID000004060 | CID000004075 | CID000004112 | CID000004158 |
| CID000004160 | CID000004163 | CID000004171 | CID000004178 | CID000004200 |
| CID000004205 | CID000004212 | CID000004409 | CID000004411 | CID000004428 |
| CID000004440 | CID000004449 | CID000004485 | CID000004493 | CID000004509 |
| CID000004542 | CID000004543 | CID000004547 | CID000004583 | CID000004585 |
| CID000004594 | CID000004599 | CID000004609 | CID000004614 | CID000004638 |
| CID000004666 | CID000004679 | CID000004691 | CID000004724 | CID000004727 |
| CID000004739 | CID000004745 | CID000004819 | CID000004828 | CID000004845 |
| CID000004856 | CID000004885 | CID000004889 | CID000004893 | CID000004911 |
| CID000004915 | CID000004920 | CID000004932 | CID000004946 | CID000004976 |
| CID000004991 | CID000005005 | CID000005029 | CID000005038 | CID000005039 |
| CID000005064 | CID000005070 | CID000005073 | CID000005077 | CID000005090 |
| CID000005095 | CID000005195 | CID000005203 | CID000005210 | CID000005253 |
| CID000005291 | CID000005352 | CID000005372 | CID000005376 | CID000005394 |
| CID000005396 | CID000005402 | CID000005408 | CID000005426 | CID000005453 |
| CID000005466 | CID000005478 | CID000005487 | CID000005514 | CID000005515 |
| CID000005516 | CID000005525 | CID000005530 | CID000005533 | CID000005538 |
| CID000005584 | CID000005625 | CID000005645 | CID000005647 | CID000005650 |

|              |              |              |              |              |
|--------------|--------------|--------------|--------------|--------------|
| CID000005656 | CID000005672 | CID000005718 | CID000005719 | CID000005734 |
| CID000005735 | CID000005746 | CID000005978 | CID000006691 | CID000007029 |
| CID000009904 | CID000010631 | CID000013342 | CID000018140 | CID000019090 |
| CID000020585 | CID000024011 | CID000028112 | CID000030623 | CID000032797 |
| CID000034312 | CID000038904 | CID000039042 | CID000040976 | CID000041317 |
| CID000047725 | CID000054454 | CID000054547 | CID000057469 | CID000059708 |
| CID000060184 | CID000060198 | CID000060613 | CID000060787 | CID000060795 |
| CID000060843 | CID000060953 | CID000064147 | CID000068740 | CID000068844 |
| CID000071158 | CID000071616 | CID000077993 | CID000082146 | CID000083786 |
| CID000104758 | CID000119607 | CID000122316 | CID000123631 | CID000125889 |
| CID000130881 | CID000147912 | CID000148192 | CID000148211 | CID000151165 |
| CID000176870 | CID000213039 | CID000216239 | CID000216326 | CID000657298 |
| CID000667490 | CID001349907 | CID003062316 | CID003081884 | CID004183806 |
| CID004659569 | CID005281007 | CID005281104 | CID005329102 | CID005353980 |
| CID005362070 | CID005487301 | CID006918453 |              |              |

(41)  $S_{41}$  : 301 drug compounds having side effect “Malaise”

|              |              |              |              |              |
|--------------|--------------|--------------|--------------|--------------|
| CID000000143 | CID000000444 | CID000000450 | CID000000564 | CID000000596 |
| CID000000598 | CID000000738 | CID000000807 | CID000001134 | CID000001546 |
| CID000001690 | CID000001775 | CID000001935 | CID000001971 | CID000001972 |
| CID000001978 | CID000001986 | CID000002022 | CID000002083 | CID000002088 |
| CID000002092 | CID000002099 | CID000002118 | CID000002131 | CID000002156 |
| CID000002160 | CID000002162 | CID000002182 | CID000002187 | CID000002216 |
| CID000002250 | CID000002265 | CID000002267 | CID000002269 | CID000002274 |
| CID000002284 | CID000002349 | CID000002369 | CID000002370 | CID000002405 |
| CID000002443 | CID000002462 | CID000002476 | CID000002477 | CID000002512 |
| CID000002550 | CID000002585 | CID000002609 | CID000002631 | CID000002656 |
| CID000002676 | CID000002678 | CID000002733 | CID000002751 | CID000002764 |
| CID000002771 | CID000002801 | CID000002802 | CID000002803 | CID000002818 |
| CID000002895 | CID000002907 | CID000002909 | CID000002951 | CID000002958 |
| CID000002978 | CID000002995 | CID000003003 | CID000003015 | CID000003019 |
| CID000003032 | CID000003040 | CID000003066 | CID000003075 | CID000003108 |
| CID000003114 | CID000003121 | CID000003148 | CID000003152 | CID000003157 |
| CID000003203 | CID000003261 | CID000003278 | CID000003279 | CID000003308 |
| CID000003310 | CID000003339 | CID000003342 | CID000003345 | CID000003355 |
| CID000003365 | CID000003367 | CID000003373 | CID000003379 | CID000003386 |
| CID000003394 | CID000003403 | CID000003404 | CID000003405 | CID000003410 |
| CID000003414 | CID000003446 | CID000003449 | CID000003454 | CID000003461 |
| CID000003475 | CID000003510 | CID000003519 | CID000003640 | CID000003648 |
| CID000003657 | CID000003672 | CID000003675 | CID000003696 | CID000003702 |
| CID000003706 | CID000003715 | CID000003724 | CID000003734 | CID000003736 |
| CID000003767 | CID000003793 | CID000003825 | CID000003826 | CID000003869 |
| CID000003877 | CID000003878 | CID000003883 | CID000003899 | CID000003902 |
| CID000003911 | CID000003937 | CID000003948 | CID000003961 | CID000003962 |

|              |              |              |              |              |
|--------------|--------------|--------------|--------------|--------------|
| CID000004036 | CID000004044 | CID000004046 | CID000004054 | CID000004075 |
| CID000004100 | CID000004112 | CID000004114 | CID000004158 | CID000004163 |
| CID000004170 | CID000004178 | CID000004200 | CID000004205 | CID000004212 |
| CID000004253 | CID000004259 | CID000004409 | CID000004428 | CID000004440 |
| CID000004449 | CID000004451 | CID000004463 | CID000004473 | CID000004485 |
| CID000004493 | CID000004509 | CID000004543 | CID000004583 | CID000004585 |
| CID000004594 | CID000004595 | CID000004607 | CID000004614 | CID000004634 |
| CID000004635 | CID000004666 | CID000004679 | CID000004691 | CID000004740 |
| CID000004745 | CID000004856 | CID000004885 | CID000004889 | CID000004891 |
| CID000004893 | CID000004894 | CID000004913 | CID000004932 | CID000004976 |
| CID000005002 | CID000005005 | CID000005029 | CID000005038 | CID000005039 |
| CID000005040 | CID000005064 | CID000005070 | CID000005073 | CID000005076 |
| CID000005077 | CID000005078 | CID000005095 | CID000005152 | CID000005195 |
| CID000005203 | CID000005212 | CID000005352 | CID000005358 | CID000005372 |
| CID000005394 | CID000005401 | CID000005402 | CID000005408 | CID000005426 |
| CID000005466 | CID000005479 | CID000005487 | CID000005496 | CID000005503 |
| CID000005514 | CID000005515 | CID000005523 | CID000005525 | CID000005533 |
| CID000005538 | CID000005544 | CID000005584 | CID000005591 | CID000005625 |
| CID000005645 | CID000005656 | CID000005672 | CID000005717 | CID000005718 |
| CID000005719 | CID000005721 | CID000005726 | CID000005731 | CID000005732 |
| CID000005734 | CID000005735 | CID000005746 | CID000005978 | CID000006049 |
| CID000006691 | CID000007029 | CID000010631 | CID000013342 | CID000019090 |
| CID000027661 | CID000027686 | CID000030623 | CID000034312 | CID000038904 |
| CID000039860 | CID000041317 | CID000041744 | CID000042615 | CID000050294 |
| CID000054454 | CID000054547 | CID000054786 | CID000060184 | CID000060613 |
| CID000060714 | CID000060754 | CID000060787 | CID000060795 | CID000060865 |
| CID000062819 | CID000062924 | CID000062959 | CID000064147 | CID000065027 |
| CID000065999 | CID000068740 | CID000071158 | CID000071273 | CID000071616 |
| CID000077992 | CID000077993 | CID000083786 | CID000093860 | CID000104758 |
| CID000119607 | CID000122316 | CID000125889 | CID000147912 | CID000148192 |
| CID000150610 | CID000151165 | CID000170361 | CID000216239 | CID000216326 |
| CID000444013 | CID000450096 | CID003062316 | CID003081884 | CID004659568 |
| CID004659569 | CID005281007 | CID005281104 | CID005282044 | CID005362420 |
| CID006436173 |              |              |              |              |

(42)  $S_{42}$  : 302 drug compounds having side effect "Allergic reaction"

|              |              |              |              |              |
|--------------|--------------|--------------|--------------|--------------|
| CID000000085 | CID000000232 | CID000000271 | CID000000444 | CID000000450 |
| CID000000453 | CID000000598 | CID000000738 | CID000000750 | CID000000772 |
| CID000000807 | CID000001071 | CID000001690 | CID000001972 | CID000002021 |
| CID000002083 | CID000002130 | CID000002141 | CID000002162 | CID000002171 |
| CID000002179 | CID000002187 | CID000002232 | CID000002250 | CID000002266 |
| CID000002267 | CID000002269 | CID000002344 | CID000002349 | CID000002369 |
| CID000002375 | CID000002435 | CID000002441 | CID000002462 | CID000002474 |
| CID000002476 | CID000002477 | CID000002478 | CID000002520 | CID000002524 |



|              |              |              |              |              |
|--------------|--------------|--------------|--------------|--------------|
| CID000002554 | CID000002576 | CID000002578 | CID000002609 | CID000002610 |
| CID000002617 | CID000002631 | CID000002637 | CID000002650 | CID000002654 |
| CID000002662 | CID000002666 | CID000002675 | CID000002676 | CID000002678 |
| CID000002708 | CID000002726 | CID000002756 | CID000002762 | CID000002764 |
| CID000002769 | CID000002771 | CID000002786 | CID000002800 | CID000002802 |
| CID000002803 | CID000002806 | CID000002895 | CID000002909 | CID000002958 |
| CID000002973 | CID000003003 | CID000003015 | CID000003016 | CID000003032 |
| CID000003040 | CID000003042 | CID000003075 | CID000003105 | CID000003108 |
| CID000003121 | CID000003143 | CID000003152 | CID000003154 | CID000003157 |
| CID000003203 | CID000003255 | CID000003261 | CID000003285 | CID000003291 |
| CID000003308 | CID000003310 | CID000003339 | CID000003345 | CID000003365 |
| CID000003366 | CID000003372 | CID000003373 | CID000003379 | CID000003381 |
| CID000003384 | CID000003385 | CID000003386 | CID000003393 | CID000003394 |
| CID000003410 | CID000003446 | CID000003454 | CID000003461 | CID000003467 |
| CID000003475 | CID000003488 | CID000003494 | CID000003510 | CID000003640 |
| CID000003648 | CID000003652 | CID000003658 | CID000003676 | CID000003690 |
| CID000003702 | CID000003724 | CID000003734 | CID000003736 | CID000003741 |
| CID000003793 | CID000003823 | CID000003825 | CID000003826 | CID000003827 |
| CID000003878 | CID000003883 | CID000003899 | CID000003911 | CID000003928 |
| CID000003948 | CID000003954 | CID000003956 | CID000004043 | CID000004053 |
| CID000004054 | CID000004064 | CID000004075 | CID000004078 | CID000004158 |
| CID000004159 | CID000004168 | CID000004173 | CID000004192 | CID000004196 |
| CID000004200 | CID000004201 | CID000004212 | CID000004236 | CID000004253 |
| CID000004259 | CID000004264 | CID000004419 | CID000004440 | CID000004449 |
| CID000004451 | CID000004463 | CID000004473 | CID000004485 | CID000004510 |
| CID000004542 | CID000004583 | CID000004585 | CID000004594 | CID000004595 |
| CID000004599 | CID000004607 | CID000004609 | CID000004635 | CID000004679 |
| CID000004691 | CID000004725 | CID000004736 | CID000004739 | CID000004819 |
| CID000004885 | CID000004891 | CID000004893 | CID000004894 | CID000004914 |
| CID000004915 | CID000004917 | CID000004919 | CID000004920 | CID000004932 |
| CID000004934 | CID000004991 | CID000005029 | CID000005073 | CID000005076 |
| CID000005077 | CID000005095 | CID000005155 | CID000005195 | CID000005203 |
| CID000005206 | CID000005210 | CID000005212 | CID000005215 | CID000005245 |
| CID000005320 | CID000005344 | CID000005372 | CID000005379 | CID000005394 |
| CID000005396 | CID000005401 | CID000005408 | CID000005426 | CID000005452 |
| CID000005453 | CID000005454 | CID000005466 | CID000005472 | CID000005478 |
| CID000005486 | CID000005487 | CID000005496 | CID000005512 | CID000005514 |
| CID000005523 | CID000005533 | CID000005538 | CID000005544 | CID000005566 |
| CID000005593 | CID000005625 | CID000005636 | CID000005650 | CID000005656 |
| CID000005672 | CID000005718 | CID000005721 | CID000005731 | CID000005732 |
| CID000005734 | CID000005735 | CID000006691 | CID000009433 | CID000010631 |
| CID000027661 | CID000027991 | CID000031378 | CID000031477 | CID000038904 |
| CID000039042 | CID000039860 | CID000040976 | CID000041693 | CID000042615 |
| CID000047319 | CID000047725 | CID000051263 | CID000054547 | CID000054688 |

|              |              |              |              |              |
|--------------|--------------|--------------|--------------|--------------|
| CID000057537 | CID000059708 | CID000060613 | CID000060787 | CID000060795 |
| CID000060843 | CID000060852 | CID000060877 | CID000062819 | CID000062867 |
| CID000062959 | CID000064147 | CID000068740 | CID000068844 | CID000071158 |
| CID000071273 | CID000071616 | CID000074989 | CID000077993 | CID000082146 |
| CID000119607 | CID000122316 | CID000123631 | CID000125889 | CID000147912 |
| CID000148192 | CID000152945 | CID000163742 | CID000444013 | CID003002190 |
| CID003081884 | CID004479097 | CID004659568 | CID004659569 | CID005281104 |
| CID005282044 | CID005362420 | CID005481350 | CID005493444 | CID006398970 |
| CID006447131 | CID009571074 |              |              |              |

(43)  $S_{43}$  : 292 drug compounds having side effect "Back pain"

|              |              |              |              |              |
|--------------|--------------|--------------|--------------|--------------|
| CID000000085 | CID000000158 | CID000000159 | CID000000191 | CID000000214 |
| CID000000444 | CID000000450 | CID000000453 | CID000000596 | CID000000598 |
| CID000000738 | CID000000750 | CID000000807 | CID000000942 | CID000001134 |
| CID000001775 | CID000001935 | CID000001972 | CID000001978 | CID000002083 |
| CID000002092 | CID000002118 | CID000002162 | CID000002182 | CID000002187 |
| CID000002215 | CID000002232 | CID000002250 | CID000002267 | CID000002284 |
| CID000002308 | CID000002311 | CID000002375 | CID000002405 | CID000002462 |
| CID000002474 | CID000002476 | CID000002478 | CID000002487 | CID000002541 |
| CID000002554 | CID000002578 | CID000002585 | CID000002609 | CID000002662 |
| CID000002676 | CID000002678 | CID000002713 | CID000002769 | CID000002771 |
| CID000002786 | CID000002800 | CID000002801 | CID000002802 | CID000002806 |
| CID000002891 | CID000002949 | CID000002951 | CID000002958 | CID000003016 |
| CID000003019 | CID000003032 | CID000003108 | CID000003121 | CID000003143 |
| CID000003152 | CID000003154 | CID000003157 | CID000003161 | CID000003261 |
| CID000003285 | CID000003310 | CID000003333 | CID000003339 | CID000003340 |
| CID000003345 | CID000003348 | CID000003379 | CID000003381 | CID000003386 |
| CID000003403 | CID000003404 | CID000003406 | CID000003410 | CID000003414 |
| CID000003417 | CID000003446 | CID000003449 | CID000003475 | CID000003676 |
| CID000003702 | CID000003706 | CID000003724 | CID000003736 | CID000003746 |
| CID000003750 | CID000003784 | CID000003793 | CID000003826 | CID000003878 |
| CID000003883 | CID000003890 | CID000003899 | CID000003902 | CID000003911 |
| CID000003937 | CID000003948 | CID000003961 | CID000003962 | CID000004054 |
| CID000004062 | CID000004075 | CID000004112 | CID000004158 | CID000004163 |
| CID000004170 | CID000004173 | CID000004195 | CID000004196 | CID000004200 |
| CID000004201 | CID000004205 | CID000004212 | CID000004236 | CID000004253 |
| CID000004259 | CID000004428 | CID000004449 | CID000004451 | CID000004485 |
| CID000004493 | CID000004513 | CID000004539 | CID000004542 | CID000004547 |
| CID000004583 | CID000004585 | CID000004594 | CID000004599 | CID000004609 |
| CID000004634 | CID000004635 | CID000004666 | CID000004679 | CID000004691 |
| CID000004740 | CID000004745 | CID000004819 | CID000004845 | CID000004885 |
| CID000004893 | CID000004920 | CID000005002 | CID000005005 | CID000005040 |
| CID000005064 | CID000005070 | CID000005073 | CID000005076 | CID000005077 |
| CID000005090 | CID000005095 | CID000005152 | CID000005155 | CID000005195 |

|              |              |              |              |              |
|--------------|--------------|--------------|--------------|--------------|
| CID000005203 | CID000005210 | CID000005212 | CID000005245 | CID000005253 |
| CID000005291 | CID000005358 | CID000005372 | CID000005376 | CID000005379 |
| CID000005391 | CID000005394 | CID000005401 | CID000005426 | CID000005466 |
| CID000005487 | CID000005496 | CID000005514 | CID000005515 | CID000005523 |
| CID000005525 | CID000005538 | CID000005544 | CID000005596 | CID000005625 |
| CID000005636 | CID000005645 | CID000005650 | CID000005656 | CID000005665 |
| CID000005672 | CID000005717 | CID000005718 | CID000005719 | CID000005726 |
| CID000005731 | CID000005732 | CID000005735 | CID000005978 | CID000008612 |
| CID000010631 | CID000014888 | CID000027661 | CID000027991 | CID000034312 |
| CID000039860 | CID000040976 | CID000041317 | CID000041744 | CID000042615 |
| CID000051634 | CID000054547 | CID000054688 | CID000054786 | CID000057469 |
| CID000057537 | CID000059708 | CID000060184 | CID000060198 | CID000060613 |
| CID000060787 | CID000060795 | CID000060852 | CID000060865 | CID000060953 |
| CID000062816 | CID000062819 | CID000062924 | CID000062959 | CID000064147 |
| CID000065999 | CID000068740 | CID000071158 | CID000071273 | CID000071329 |
| CID000071616 | CID000072054 | CID000072938 | CID000077992 | CID000077993 |
| CID000077999 | CID000082146 | CID000093860 | CID000096312 | CID000104741 |
| CID000104865 | CID000110634 | CID000110635 | CID000115237 | CID000119182 |
| CID000119607 | CID000123606 | CID000123620 | CID000125889 | CID000130881 |
| CID000147912 | CID000148192 | CID000150311 | CID000151165 | CID000158440 |
| CID000160051 | CID000163742 | CID000166548 | CID000170361 | CID000216326 |
| CID000443871 | CID000444013 | CID000444033 | CID000450096 | CID000477468 |
| CID003002190 | CID003081884 | CID004183806 | CID004659568 | CID005229711 |
| CID005281104 | CID005282044 | CID005282226 | CID005311181 | CID005329102 |
| CID005362420 | CID005481350 | CID005487301 | CID005493381 | CID005493444 |
| CID006398525 | CID006447131 |              |              |              |

(44)  $\mathbb{S}_{44}$  : 296 drug compounds having side effect "Tremor"

|              |              |              |              |              |
|--------------|--------------|--------------|--------------|--------------|
| CID000000158 | CID000000159 | CID000000191 | CID000000401 | CID000000444 |
| CID000000596 | CID000000767 | CID000000838 | CID000000853 | CID000000942 |
| CID000001065 | CID000001206 | CID000001775 | CID000001935 | CID000001972 |
| CID000002022 | CID000002083 | CID000002099 | CID000002118 | CID000002130 |
| CID000002140 | CID000002142 | CID000002153 | CID000002156 | CID000002160 |
| CID000002162 | CID000002170 | CID000002284 | CID000002349 | CID000002369 |
| CID000002405 | CID000002462 | CID000002474 | CID000002476 | CID000002477 |
| CID000002487 | CID000002520 | CID000002554 | CID000002564 | CID000002576 |
| CID000002578 | CID000002609 | CID000002676 | CID000002678 | CID000002708 |
| CID000002725 | CID000002726 | CID000002751 | CID000002764 | CID000002769 |
| CID000002771 | CID000002781 | CID000002801 | CID000002802 | CID000002818 |
| CID000002895 | CID000002909 | CID000002913 | CID000002949 | CID000002958 |
| CID000002995 | CID000003007 | CID000003032 | CID000003066 | CID000003075 |
| CID000003100 | CID000003108 | CID000003121 | CID000003125 | CID000003148 |
| CID000003152 | CID000003157 | CID000003158 | CID000003203 | CID000003261 |
| CID000003308 | CID000003333 | CID000003342 | CID000003345 | CID000003355 |

|              |              |              |              |              |
|--------------|--------------|--------------|--------------|--------------|
| CID000003365 | CID000003372 | CID000003373 | CID000003386 | CID000003394 |
| CID000003403 | CID000003404 | CID000003410 | CID000003414 | CID000003419 |
| CID000003446 | CID000003449 | CID000003454 | CID000003476 | CID000003478 |
| CID000003510 | CID000003518 | CID000003519 | CID000003637 | CID000003648 |
| CID000003658 | CID000003661 | CID000003672 | CID000003675 | CID000003676 |
| CID000003696 | CID000003730 | CID000003734 | CID000003736 | CID000003739 |
| CID000003741 | CID000003746 | CID000003749 | CID000003759 | CID000003779 |
| CID000003793 | CID000003826 | CID000003869 | CID000003878 | CID000003883 |
| CID000003911 | CID000003937 | CID000003948 | CID000003958 | CID000003961 |
| CID000003962 | CID000003964 | CID000004011 | CID000004032 | CID000004044 |
| CID000004046 | CID000004054 | CID000004058 | CID000004060 | CID000004062 |
| CID000004075 | CID000004078 | CID000004086 | CID000004091 | CID000004095 |
| CID000004158 | CID000004168 | CID000004173 | CID000004178 | CID000004192 |
| CID000004197 | CID000004205 | CID000004236 | CID000004253 | CID000004259 |
| CID000004409 | CID000004419 | CID000004428 | CID000004440 | CID000004449 |
| CID000004473 | CID000004485 | CID000004539 | CID000004543 | CID000004583 |
| CID000004585 | CID000004594 | CID000004595 | CID000004601 | CID000004609 |
| CID000004614 | CID000004616 | CID000004635 | CID000004679 | CID000004691 |
| CID000004736 | CID000004740 | CID000004745 | CID000004771 | CID000004819 |
| CID000004845 | CID000004856 | CID000004885 | CID000004889 | CID000004914 |
| CID000004915 | CID000004917 | CID000004920 | CID000004927 | CID000004932 |
| CID000004943 | CID000004976 | CID000005002 | CID000005029 | CID000005038 |
| CID000005040 | CID000005070 | CID000005071 | CID000005073 | CID000005076 |
| CID000005077 | CID000005078 | CID000005095 | CID000005152 | CID000005203 |
| CID000005210 | CID000005212 | CID000005358 | CID000005372 | CID000005379 |
| CID000005391 | CID000005394 | CID000005401 | CID000005403 | CID000005419 |
| CID000005426 | CID000005452 | CID000005466 | CID000005487 | CID000005514 |
| CID000005516 | CID000005523 | CID000005530 | CID000005533 | CID000005538 |
| CID000005566 | CID000005584 | CID000005625 | CID000005647 | CID000005656 |
| CID000005665 | CID000005718 | CID000005719 | CID000005726 | CID000005731 |
| CID000005732 | CID000005734 | CID000005735 | CID000006049 | CID000006058 |
| CID000007029 | CID000008612 | CID000009433 | CID000010631 | CID000014888 |
| CID000016362 | CID000023897 | CID000027661 | CID000028112 | CID000034312 |
| CID000039860 | CID000042615 | CID000050294 | CID000051634 | CID000054454 |
| CID000054688 | CID000056959 | CID000057537 | CID000059708 | CID000060184 |
| CID000060613 | CID000060714 | CID000060754 | CID000060787 | CID000060795 |
| CID000060953 | CID000062867 | CID000062924 | CID000062959 | CID000064147 |
| CID000068740 | CID000071158 | CID000071273 | CID000071616 | CID000072938 |
| CID000077992 | CID000077993 | CID000096312 | CID000104865 | CID000115237 |
| CID000119182 | CID000119607 | CID000122316 | CID000123606 | CID000125017 |
| CID000125889 | CID000147912 | CID000150610 | CID000151165 | CID000158440 |
| CID000170361 | CID000216326 | CID000443871 | CID000444013 | CID000450096 |
| CID003062316 | CID003081884 | CID004659569 | CID005282044 | CID005311297 |
| CID006435110 |              |              |              |              |

(45)  $S_{45}$  : 288 drug compounds having side effect “Nervousness”

|             |             |             |             |             |
|-------------|-------------|-------------|-------------|-------------|
| CID00000159 | CID00000191 | CID00000444 | CID00000450 | CID00000807 |
| CID00000838 | CID00000853 | CID00000937 | CID00001065 | CID00001690 |
| CID00001775 | CID00001935 | CID00001972 | CID00002083 | CID00002118 |
| CID00002130 | CID00002153 | CID00002162 | CID00002170 | CID00002182 |
| CID00002187 | CID00002216 | CID00002249 | CID00002267 | CID00002269 |
| CID00002311 | CID00002344 | CID00002349 | CID00002369 | CID00002375 |
| CID00002443 | CID00002462 | CID00002474 | CID00002476 | CID00002477 |
| CID00002478 | CID00002487 | CID00002512 | CID00002550 | CID00002554 |
| CID00002564 | CID00002585 | CID00002609 | CID00002610 | CID00002646 |
| CID00002662 | CID00002678 | CID00002725 | CID00002751 | CID00002762 |
| CID00002764 | CID00002769 | CID00002771 | CID00002781 | CID00002800 |
| CID00002801 | CID00002802 | CID00002803 | CID00002891 | CID00002895 |
| CID00002909 | CID00002913 | CID00002949 | CID00002951 | CID00002978 |
| CID00003007 | CID00003016 | CID00003032 | CID00003042 | CID00003059 |
| CID00003066 | CID00003075 | CID00003100 | CID00003108 | CID00003114 |
| CID00003121 | CID00003151 | CID00003152 | CID00003154 | CID00003157 |
| CID00003158 | CID00003203 | CID00003222 | CID00003261 | CID00003285 |
| CID00003308 | CID00003333 | CID00003339 | CID00003340 | CID00003342 |
| CID00003345 | CID00003348 | CID00003354 | CID00003355 | CID00003373 |
| CID00003379 | CID00003386 | CID00003393 | CID00003394 | CID00003397 |
| CID00003404 | CID00003410 | CID00003414 | CID00003417 | CID00003446 |
| CID00003449 | CID00003454 | CID00003475 | CID00003476 | CID00003478 |
| CID00003494 | CID00003510 | CID00003519 | CID00003648 | CID00003652 |
| CID00003672 | CID00003676 | CID00003696 | CID00003702 | CID00003715 |
| CID00003724 | CID00003746 | CID00003749 | CID00003779 | CID00003784 |
| CID00003825 | CID00003826 | CID00003827 | CID00003878 | CID00003883 |
| CID00003902 | CID00003911 | CID00003937 | CID00003948 | CID00003956 |
| CID00003957 | CID00003958 | CID00003961 | CID00004011 | CID00004044 |
| CID00004054 | CID00004057 | CID00004060 | CID00004075 | CID00004086 |
| CID00004114 | CID00004158 | CID00004170 | CID00004171 | CID00004178 |
| CID00004192 | CID00004195 | CID00004205 | CID00004236 | CID00004253 |
| CID00004259 | CID00004409 | CID00004419 | CID00004425 | CID00004428 |
| CID00004436 | CID00004473 | CID00004485 | CID00004493 | CID00004506 |
| CID00004513 | CID00004539 | CID00004542 | CID00004583 | CID00004585 |
| CID00004594 | CID00004609 | CID00004614 | CID00004634 | CID00004635 |
| CID00004679 | CID00004691 | CID00004737 | CID00004739 | CID00004740 |
| CID00004745 | CID00004819 | CID00004828 | CID00004845 | CID00004856 |
| CID00004885 | CID00004889 | CID00004893 | CID00004914 | CID00004915 |
| CID00004920 | CID00004927 | CID00004934 | CID00005002 | CID00005005 |
| CID00005029 | CID00005038 | CID00005040 | CID00005052 | CID00005064 |
| CID00005071 | CID00005073 | CID00005076 | CID00005077 | CID00005078 |
| CID00005095 | CID00005152 | CID00005193 | CID00005195 | CID00005203 |

|              |              |              |              |              |
|--------------|--------------|--------------|--------------|--------------|
| CID000005206 | CID000005210 | CID000005212 | CID000005352 | CID000005372 |
| CID000005379 | CID000005391 | CID000005401 | CID000005403 | CID000005408 |
| CID000005426 | CID000005466 | CID000005478 | CID000005487 | CID000005514 |
| CID000005523 | CID000005533 | CID000005538 | CID000005556 | CID000005572 |
| CID000005625 | CID000005645 | CID000005656 | CID000005665 | CID000005718 |
| CID000005719 | CID000005726 | CID000005731 | CID000005732 | CID000005734 |
| CID000005735 | CID000006058 | CID000006476 | CID000007029 | CID000009433 |
| CID000010631 | CID000020585 | CID000027400 | CID000027661 | CID000027686 |
| CID000031477 | CID000034312 | CID000039860 | CID000040976 | CID000041317 |
| CID000041781 | CID000042615 | CID000054547 | CID000054688 | CID000054786 |
| CID000059708 | CID000060184 | CID000060613 | CID000060795 | CID000062959 |
| CID000064147 | CID000065999 | CID000071158 | CID000071273 | CID000072938 |
| CID000077992 | CID000077993 | CID000119607 | CID000123606 | CID000125017 |
| CID000125889 | CID000148192 | CID000150610 | CID000444013 | CID003002190 |
| CID003081884 | CID004659568 | CID004659569 | CID005229711 | CID005281104 |
| CID005282044 | CID005311027 | CID009571074 |              |              |

(46)  $S_{46}$  : 282 drug compounds having side effect "Hemorrhage"

|              |              |              |              |              |
|--------------|--------------|--------------|--------------|--------------|
| CID000000085 | CID000000137 | CID000000158 | CID000000159 | CID000000214 |
| CID000000444 | CID000000450 | CID000000596 | CID000000772 | CID000000807 |
| CID000000838 | CID000000937 | CID000001003 | CID000001065 | CID000001125 |
| CID000001546 | CID000001775 | CID000001935 | CID000001972 | CID000002088 |
| CID000002099 | CID000002156 | CID000002179 | CID000002182 | CID000002187 |
| CID000002232 | CID000002250 | CID000002265 | CID000002349 | CID000002369 |
| CID000002375 | CID000002435 | CID000002462 | CID000002477 | CID000002478 |
| CID000002519 | CID000002541 | CID000002578 | CID000002585 | CID000002609 |
| CID000002610 | CID000002617 | CID000002622 | CID000002631 | CID000002637 |
| CID000002646 | CID000002650 | CID000002654 | CID000002655 | CID000002656 |
| CID000002658 | CID000002666 | CID000002675 | CID000002678 | CID000002713 |
| CID000002764 | CID000002801 | CID000002802 | CID000002806 | CID000002812 |
| CID000002907 | CID000002909 | CID000002949 | CID000002951 | CID000003003 |
| CID000003009 | CID000003015 | CID000003032 | CID000003075 | CID000003108 |
| CID000003121 | CID000003143 | CID000003152 | CID000003285 | CID000003308 |
| CID000003325 | CID000003340 | CID000003342 | CID000003345 | CID000003365 |
| CID000003367 | CID000003381 | CID000003385 | CID000003386 | CID000003387 |
| CID000003394 | CID000003410 | CID000003446 | CID000003449 | CID000003454 |
| CID000003461 | CID000003475 | CID000003640 | CID000003648 | CID000003657 |
| CID000003676 | CID000003685 | CID000003690 | CID000003698 | CID000003706 |
| CID000003715 | CID000003734 | CID000003736 | CID000003741 | CID000003746 |
| CID000003750 | CID000003826 | CID000003878 | CID000003902 | CID000003911 |
| CID000003929 | CID000003956 | CID000003958 | CID000003998 | CID000004033 |
| CID000004044 | CID000004053 | CID000004054 | CID000004112 | CID000004159 |
| CID000004160 | CID000004196 | CID000004212 | CID000004259 | CID000004264 |
| CID000004409 | CID000004428 | CID000004440 | CID000004449 | CID000004485 |

|              |              |              |              |              |
|--------------|--------------|--------------|--------------|--------------|
| CID000004536 | CID000004542 | CID000004583 | CID000004585 | CID000004603 |
| CID000004609 | CID000004614 | CID000004635 | CID000004638 | CID000004666 |
| CID000004679 | CID000004727 | CID000004739 | CID000004740 | CID000004745 |
| CID000004819 | CID000004834 | CID000004856 | CID000004865 | CID000004885 |
| CID000004893 | CID000004894 | CID000004900 | CID000004915 | CID000004920 |
| CID000004932 | CID000004935 | CID000004943 | CID000005029 | CID000005040 |
| CID000005064 | CID000005070 | CID000005073 | CID000005076 | CID000005077 |
| CID000005095 | CID000005195 | CID000005203 | CID000005206 | CID000005210 |
| CID000005212 | CID000005245 | CID000005253 | CID000005267 | CID000005291 |
| CID000005358 | CID000005359 | CID000005372 | CID000005376 | CID000005379 |
| CID000005381 | CID000005394 | CID000005396 | CID000005408 | CID000005453 |
| CID000005466 | CID000005472 | CID000005486 | CID000005487 | CID000005504 |
| CID000005514 | CID000005515 | CID000005523 | CID000005538 | CID000005544 |
| CID000005636 | CID000005645 | CID000005656 | CID000005717 | CID000005718 |
| CID000005719 | CID000005721 | CID000005732 | CID000006058 | CID000006691 |
| CID000009904 | CID000010631 | CID000013342 | CID000014888 | CID000019090 |
| CID000020585 | CID000027661 | CID000030623 | CID000031378 | CID000034312 |
| CID000038904 | CID000040976 | CID000041317 | CID000041781 | CID000042113 |
| CID000047725 | CID000050614 | CID000051634 | CID000054547 | CID000054786 |
| CID000057469 | CID000060184 | CID000060198 | CID000060612 | CID000060787 |
| CID000060795 | CID000060852 | CID000060953 | CID000062816 | CID000062819 |
| CID000062959 | CID000064147 | CID000071158 | CID000071273 | CID000071616 |
| CID000072938 | CID000077992 | CID000077993 | CID000082146 | CID000083786 |
| CID000093860 | CID000104741 | CID000104865 | CID000110634 | CID000119607 |
| CID000122316 | CID000123631 | CID000125017 | CID000125889 | CID000145068 |
| CID000147912 | CID000150310 | CID000150610 | CID000151165 | CID000158440 |
| CID000176870 | CID000197712 | CID000216239 | CID000216326 | CID000222786 |
| CID000444013 | CID000444033 | CID000477468 | CID000657298 | CID003062316 |
| CID003081884 | CID003086672 | CID004659568 | CID004659569 | CID005281104 |
| CID005282226 | CID005329102 | CID005353894 | CID005362420 | CID005493444 |
| CID006398970 | CID009571074 |              |              |              |

(47)  $\mathbb{S}_{47}$  : 284 drug compounds having side effect "Arrhythmia"

|              |              |              |              |              |
|--------------|--------------|--------------|--------------|--------------|
| CID000000085 | CID000000158 | CID000000159 | CID000000191 | CID000000206 |
| CID000000444 | CID000000598 | CID000000681 | CID000000767 | CID000000807 |
| CID000000838 | CID000000861 | CID000000937 | CID000000951 | CID000001546 |
| CID000001690 | CID000001972 | CID000002083 | CID000002092 | CID000002099 |
| CID000002130 | CID000002140 | CID000002141 | CID000002153 | CID000002160 |
| CID000002162 | CID000002170 | CID000002179 | CID000002182 | CID000002216 |
| CID000002249 | CID000002250 | CID000002269 | CID000002284 | CID000002311 |
| CID000002349 | CID000002369 | CID000002375 | CID000002405 | CID000002435 |
| CID000002443 | CID000002474 | CID000002478 | CID000002487 | CID000002512 |
| CID000002524 | CID000002554 | CID000002578 | CID000002583 | CID000002631 |
| CID000002678 | CID000002751 | CID000002764 | CID000002771 | CID000002800 |

|              |              |              |              |              |
|--------------|--------------|--------------|--------------|--------------|
| CID000002801 | CID000002803 | CID000002818 | CID000002895 | CID000002907 |
| CID000002909 | CID000002958 | CID000002995 | CID000003003 | CID000003007 |
| CID000003015 | CID000003019 | CID000003032 | CID000003062 | CID000003105 |
| CID000003108 | CID000003121 | CID000003143 | CID000003148 | CID000003152 |
| CID000003154 | CID000003156 | CID000003157 | CID000003203 | CID000003226 |
| CID000003255 | CID000003261 | CID000003308 | CID000003325 | CID000003333 |
| CID000003339 | CID000003345 | CID000003367 | CID000003372 | CID000003373 |
| CID000003385 | CID000003386 | CID000003394 | CID000003404 | CID000003410 |
| CID000003414 | CID000003419 | CID000003449 | CID000003454 | CID000003461 |
| CID000003478 | CID000003510 | CID000003559 | CID000003562 | CID000003640 |
| CID000003648 | CID000003661 | CID000003672 | CID000003690 | CID000003696 |
| CID000003698 | CID000003702 | CID000003715 | CID000003724 | CID000003734 |
| CID000003736 | CID000003737 | CID000003741 | CID000003742 | CID000003750 |
| CID000003763 | CID000003779 | CID000003793 | CID000003821 | CID000003823 |
| CID000003825 | CID000003826 | CID000003869 | CID000003883 | CID000003911 |
| CID000003914 | CID000003937 | CID000003948 | CID000003958 | CID000003961 |
| CID000004011 | CID000004044 | CID000004053 | CID000004062 | CID000004064 |
| CID000004078 | CID000004095 | CID000004114 | CID000004158 | CID000004159 |
| CID000004171 | CID000004205 | CID000004212 | CID000004236 | CID000004259 |
| CID000004409 | CID000004485 | CID000004539 | CID000004542 | CID000004547 |
| CID000004583 | CID000004594 | CID000004595 | CID000004603 | CID000004609 |
| CID000004614 | CID000004634 | CID000004666 | CID000004679 | CID000004691 |
| CID000004739 | CID000004740 | CID000004745 | CID000004775 | CID000004819 |
| CID000004828 | CID000004856 | CID000004885 | CID000004891 | CID000004894 |
| CID000004914 | CID000004915 | CID000004943 | CID000004976 | CID000005005 |
| CID000005029 | CID000005038 | CID000005039 | CID000005052 | CID000005064 |
| CID000005073 | CID000005077 | CID000005078 | CID000005095 | CID000005152 |
| CID000005195 | CID000005203 | CID000005206 | CID000005212 | CID000005234 |
| CID000005245 | CID000005314 | CID000005352 | CID000005358 | CID000005372 |
| CID000005376 | CID000005396 | CID000005401 | CID000005426 | CID000005452 |
| CID000005478 | CID000005487 | CID000005504 | CID000005514 | CID000005516 |
| CID000005523 | CID000005525 | CID000005533 | CID000005538 | CID000005544 |
| CID000005584 | CID000005645 | CID000005656 | CID000005672 | CID000005718 |
| CID000005721 | CID000005731 | CID000005732 | CID000005771 | CID000005775 |
| CID000005978 | CID000007029 | CID000008612 | CID000009433 | CID000014888 |
| CID000020585 | CID000027661 | CID000027991 | CID000028112 | CID000036339 |
| CID000039860 | CID000041693 | CID000042113 | CID000047725 | CID000051263 |
| CID000054688 | CID000057469 | CID000057537 | CID000060184 | CID000060612 |
| CID000060754 | CID000060843 | CID000060953 | CID000064147 | CID000065999 |
| CID000071273 | CID000071616 | CID000077993 | CID000082146 | CID000093860 |
| CID000104758 | CID000104865 | CID000110634 | CID000110635 | CID000115237 |
| CID000119607 | CID000122316 | CID000123631 | CID000125889 | CID000147912 |
| CID000148211 | CID000150610 | CID000166548 | CID000170361 | CID000176870 |
| CID000216239 | CID000216326 | CID000444013 | CID000477468 | CID003002190 |



|              |              |              |              |              |
|--------------|--------------|--------------|--------------|--------------|
| CID003062316 | CID003081884 | CID004183806 | CID004659569 | CID005281007 |
| CID005281104 | CID005282044 | CID005329102 | CID005487301 |              |

(48)  $S_{48}$  : 276 drug compounds having side effect “Tinnitus”

|              |              |              |              |              |
|--------------|--------------|--------------|--------------|--------------|
| CID000000444 | CID000000450 | CID000000564 | CID000000767 | CID000000807 |
| CID000000815 | CID000000937 | CID000001065 | CID000001690 | CID000001775 |
| CID000001935 | CID000001972 | CID000001978 | CID000001986 | CID000002083 |
| CID000002118 | CID000002156 | CID000002160 | CID000002162 | CID000002170 |
| CID000002182 | CID000002244 | CID000002249 | CID000002250 | CID000002269 |
| CID000002274 | CID000002284 | CID000002311 | CID000002349 | CID000002369 |
| CID000002405 | CID000002474 | CID000002476 | CID000002477 | CID000002487 |
| CID000002520 | CID000002541 | CID000002554 | CID000002564 | CID000002585 |
| CID000002662 | CID000002678 | CID000002719 | CID000002725 | CID000002751 |
| CID000002762 | CID000002764 | CID000002771 | CID000002781 | CID000002800 |
| CID000002801 | CID000002803 | CID000002895 | CID000002909 | CID000002913 |
| CID000002958 | CID000002973 | CID000002978 | CID000002983 | CID000002995 |
| CID000003032 | CID000003059 | CID000003066 | CID000003075 | CID000003100 |
| CID000003108 | CID000003121 | CID000003148 | CID000003152 | CID000003154 |
| CID000003157 | CID000003158 | CID000003203 | CID000003222 | CID000003255 |
| CID000003261 | CID000003278 | CID000003308 | CID000003324 | CID000003325 |
| CID000003342 | CID000003345 | CID000003355 | CID000003373 | CID000003386 |
| CID000003394 | CID000003404 | CID000003419 | CID000003440 | CID000003446 |
| CID000003449 | CID000003454 | CID000003467 | CID000003475 | CID000003519 |
| CID000003648 | CID000003652 | CID000003672 | CID000003676 | CID000003696 |
| CID000003702 | CID000003715 | CID000003724 | CID000003741 | CID000003746 |
| CID000003793 | CID000003825 | CID000003826 | CID000003878 | CID000003883 |
| CID000003911 | CID000003928 | CID000003929 | CID000003937 | CID000003948 |
| CID000003961 | CID000004011 | CID000004033 | CID000004036 | CID000004044 |
| CID000004046 | CID000004054 | CID000004062 | CID000004075 | CID000004100 |
| CID000004112 | CID000004140 | CID000004170 | CID000004171 | CID000004178 |
| CID000004200 | CID000004205 | CID000004259 | CID000004409 | CID000004411 |
| CID000004428 | CID000004440 | CID000004449 | CID000004473 | CID000004485 |
| CID000004539 | CID000004543 | CID000004583 | CID000004585 | CID000004594 |
| CID000004614 | CID000004634 | CID000004635 | CID000004666 | CID000004679 |
| CID000004691 | CID000004727 | CID000004736 | CID000004739 | CID000004745 |
| CID000004819 | CID000004828 | CID000004856 | CID000004885 | CID000004889 |
| CID000004893 | CID000004914 | CID000004920 | CID000004927 | CID000004932 |
| CID000004943 | CID000004946 | CID000004976 | CID000005002 | CID000005005 |
| CID000005029 | CID000005038 | CID000005040 | CID000005064 | CID000005071 |
| CID000005073 | CID000005076 | CID000005077 | CID000005078 | CID000005090 |
| CID000005095 | CID000005195 | CID000005203 | CID000005210 | CID000005212 |
| CID000005215 | CID000005245 | CID000005291 | CID000005344 | CID000005352 |
| CID000005358 | CID000005372 | CID000005379 | CID000005394 | CID000005401 |
| CID000005426 | CID000005430 | CID000005466 | CID000005472 | CID000005478 |

|              |              |              |              |              |
|--------------|--------------|--------------|--------------|--------------|
| CID000005487 | CID000005496 | CID000005508 | CID000005514 | CID000005523 |
| CID000005525 | CID000005530 | CID000005533 | CID000005538 | CID000005556 |
| CID000005584 | CID000005625 | CID000005645 | CID000005651 | CID000005656 |
| CID000005718 | CID000005719 | CID000005731 | CID000005732 | CID000005734 |
| CID000005735 | CID000008612 | CID000010631 | CID000014888 | CID000018140 |
| CID000027661 | CID000027686 | CID000028112 | CID000034312 | CID000038904 |
| CID000039860 | CID000041317 | CID000042615 | CID000054547 | CID000054688 |
| CID000056959 | CID000057537 | CID000060184 | CID000060613 | CID000060714 |
| CID000060754 | CID000060787 | CID000060795 | CID000062959 | CID000064147 |
| CID000065999 | CID000071158 | CID000071273 | CID000071616 | CID000077992 |
| CID000077993 | CID000083786 | CID000104865 | CID000110634 | CID000110635 |
| CID000119607 | CID000123606 | CID000125017 | CID000125889 | CID000147912 |
| CID000148192 | CID000148211 | CID000151165 | CID000158440 | CID000170361 |
| CID000216239 | CID000216326 | CID000444013 | CID003062316 | CID003081884 |
| CID004183806 | CID004659569 | CID005229711 | CID005353980 | CID006436173 |
| CID011947681 |              |              |              |              |

(49)  $S_{49}$  : 273 drug compounds having side effect “Anaphylaxis”

|              |              |              |              |              |
|--------------|--------------|--------------|--------------|--------------|
| CID000000119 | CID000000298 | CID000000450 | CID000000564 | CID000000596 |
| CID000000807 | CID000000937 | CID000001003 | CID000001071 | CID000001690 |
| CID000001971 | CID000001972 | CID000001986 | CID000002021 | CID000002022 |
| CID000002083 | CID000002130 | CID000002140 | CID000002148 | CID000002171 |
| CID000002173 | CID000002187 | CID000002244 | CID000002250 | CID000002269 |
| CID000002274 | CID000002308 | CID000002315 | CID000002349 | CID000002366 |
| CID000002441 | CID000002462 | CID000002474 | CID000002476 | CID000002520 |
| CID000002524 | CID000002554 | CID000002585 | CID000002609 | CID000002610 |
| CID000002617 | CID000002622 | CID000002631 | CID000002637 | CID000002646 |
| CID000002650 | CID000002654 | CID000002655 | CID000002656 | CID000002658 |
| CID000002662 | CID000002666 | CID000002675 | CID000002676 | CID000002678 |
| CID000002713 | CID000002720 | CID000002733 | CID000002756 | CID000002762 |
| CID000002764 | CID000002771 | CID000002781 | CID000002802 | CID000002891 |
| CID000002895 | CID000002907 | CID000002951 | CID000002973 | CID000002983 |
| CID000003003 | CID000003007 | CID000003016 | CID000003032 | CID000003040 |
| CID000003042 | CID000003059 | CID000003121 | CID000003143 | CID000003148 |
| CID000003154 | CID000003168 | CID000003255 | CID000003285 | CID000003308 |
| CID000003325 | CID000003342 | CID000003345 | CID000003348 | CID000003365 |
| CID000003367 | CID000003385 | CID000003394 | CID000003403 | CID000003404 |
| CID000003405 | CID000003410 | CID000003417 | CID000003446 | CID000003454 |
| CID000003463 | CID000003494 | CID000003510 | CID000003636 | CID000003639 |
| CID000003640 | CID000003661 | CID000003672 | CID000003676 | CID000003685 |
| CID000003702 | CID000003715 | CID000003724 | CID000003736 | CID000003737 |
| CID000003741 | CID000003742 | CID000003746 | CID000003793 | CID000003821 |
| CID000003823 | CID000003825 | CID000003826 | CID000003877 | CID000003883 |
| CID000003899 | CID000003911 | CID000003928 | CID000003929 | CID000003948 |

|              |              |              |              |              |
|--------------|--------------|--------------|--------------|--------------|
| CID000003954 | CID000003956 | CID000003957 | CID000003961 | CID000003962 |
| CID000004033 | CID000004046 | CID000004053 | CID000004057 | CID000004064 |
| CID000004107 | CID000004112 | CID000004121 | CID000004140 | CID000004158 |
| CID000004170 | CID000004192 | CID000004197 | CID000004200 | CID000004212 |
| CID000004236 | CID000004253 | CID000004259 | CID000004409 | CID000004421 |
| CID000004440 | CID000004449 | CID000004463 | CID000004485 | CID000004509 |
| CID000004513 | CID000004539 | CID000004583 | CID000004594 | CID000004595 |
| CID000004599 | CID000004601 | CID000004607 | CID000004609 | CID000004614 |
| CID000004635 | CID000004645 | CID000004679 | CID000004691 | CID000004730 |
| CID000004856 | CID000004889 | CID000004894 | CID000004911 | CID000004920 |
| CID000004934 | CID000004943 | CID000004993 | CID000005002 | CID000005029 |
| CID000005039 | CID000005073 | CID000005078 | CID000005152 | CID000005210 |
| CID000005267 | CID000005297 | CID000005314 | CID000005344 | CID000005352 |
| CID000005358 | CID000005379 | CID000005394 | CID000005401 | CID000005412 |
| CID000005430 | CID000005453 | CID000005454 | CID000005472 | CID000005478 |
| CID000005486 | CID000005487 | CID000005523 | CID000005544 | CID000005546 |
| CID000005578 | CID000005596 | CID000005647 | CID000005650 | CID000005651 |
| CID000005656 | CID000005672 | CID000005726 | CID000005731 | CID000005732 |
| CID000005735 | CID000005771 | CID000005978 | CID000006691 | CID000009034 |
| CID000010631 | CID000016850 | CID000027686 | CID000027991 | CID000034312 |
| CID000038904 | CID000041693 | CID000047725 | CID000050294 | CID000050614 |
| CID000051263 | CID000054454 | CID000054547 | CID000054688 | CID000060184 |
| CID000060795 | CID000062924 | CID000062959 | CID000065999 | CID000068740 |
| CID000071273 | CID000072938 | CID000077992 | CID000077999 | CID000093860 |
| CID000104865 | CID000110634 | CID000115237 | CID000119607 | CID000123620 |
| CID000124087 | CID000130881 | CID000150311 | CID000150610 | CID000151165 |
| CID000477468 | CID003002190 | CID004183806 | CID004479097 | CID005281007 |
| CID005282044 | CID005311297 | CID005353980 | CID005381226 | CID005493381 |
| CID006398970 | CID006447131 | CID009571074 |              |              |

(50)  $S_{50}$ : 276 drug compounds having side effect “Blurred vision”

|              |              |              |              |              |
|--------------|--------------|--------------|--------------|--------------|
| CID000000158 | CID000000191 | CID000000444 | CID000000453 | CID000000596 |
| CID000000767 | CID000001065 | CID000001972 | CID000001978 | CID000002118 |
| CID000002156 | CID000002160 | CID000002170 | CID000002179 | CID000002182 |
| CID000002216 | CID000002249 | CID000002267 | CID000002284 | CID000002315 |
| CID000002344 | CID000002349 | CID000002369 | CID000002435 | CID000002441 |
| CID000002462 | CID000002474 | CID000002476 | CID000002477 | CID000002487 |
| CID000002520 | CID000002550 | CID000002554 | CID000002564 | CID000002578 |
| CID000002585 | CID000002662 | CID000002676 | CID000002719 | CID000002720 |
| CID000002725 | CID000002764 | CID000002771 | CID000002781 | CID000002800 |
| CID000002802 | CID000002803 | CID000002895 | CID000002905 | CID000002907 |
| CID000002913 | CID000002973 | CID000002995 | CID000003016 | CID000003019 |
| CID000003032 | CID000003042 | CID000003059 | CID000003075 | CID000003100 |
| CID000003114 | CID000003121 | CID000003152 | CID000003154 | CID000003157 |

|              |              |              |              |              |
|--------------|--------------|--------------|--------------|--------------|
| CID000003158 | CID000003203 | CID000003219 | CID000003222 | CID000003278 |
| CID000003279 | CID000003308 | CID000003342 | CID000003345 | CID000003348 |
| CID000003354 | CID000003355 | CID000003372 | CID000003373 | CID000003379 |
| CID000003381 | CID000003384 | CID000003385 | CID000003393 | CID000003404 |
| CID000003406 | CID000003440 | CID000003446 | CID000003449 | CID000003463 |
| CID000003476 | CID000003478 | CID000003488 | CID000003494 | CID000003518 |
| CID000003519 | CID000003559 | CID000003639 | CID000003648 | CID000003652 |
| CID000003661 | CID000003672 | CID000003675 | CID000003676 | CID000003690 |
| CID000003696 | CID000003702 | CID000003715 | CID000003736 | CID000003741 |
| CID000003746 | CID000003793 | CID000003821 | CID000003826 | CID000003878 |
| CID000003883 | CID000003890 | CID000003899 | CID000003902 | CID000003911 |
| CID000003929 | CID000003937 | CID000003958 | CID000003961 | CID000003962 |
| CID000003964 | CID000004011 | CID000004032 | CID000004034 | CID000004036 |
| CID000004043 | CID000004044 | CID000004054 | CID000004057 | CID000004062 |
| CID000004075 | CID000004078 | CID000004086 | CID000004091 | CID000004107 |
| CID000004112 | CID000004121 | CID000004158 | CID000004170 | CID000004171 |
| CID000004178 | CID000004192 | CID000004200 | CID000004212 | CID000004253 |
| CID000004411 | CID000004419 | CID000004440 | CID000004449 | CID000004473 |
| CID000004485 | CID000004493 | CID000004506 | CID000004510 | CID000004539 |
| CID000004543 | CID000004583 | CID000004594 | CID000004595 | CID000004601 |
| CID000004614 | CID000004616 | CID000004666 | CID000004679 | CID000004691 |
| CID000004736 | CID000004740 | CID000004748 | CID000004819 | CID000004856 |
| CID000004885 | CID000004889 | CID000004893 | CID000004894 | CID000004914 |
| CID000004917 | CID000004919 | CID000004920 | CID000004927 | CID000004932 |
| CID000004934 | CID000004976 | CID000005002 | CID000005029 | CID000005039 |
| CID000005064 | CID000005076 | CID000005077 | CID000005078 | CID000005090 |
| CID000005095 | CID000005195 | CID000005210 | CID000005212 | CID000005291 |
| CID000005352 | CID000005379 | CID000005391 | CID000005394 | CID000005401 |
| CID000005430 | CID000005452 | CID000005453 | CID000005454 | CID000005478 |
| CID000005487 | CID000005514 | CID000005516 | CID000005523 | CID000005530 |
| CID000005533 | CID000005538 | CID000005566 | CID000005572 | CID000005584 |
| CID000005593 | CID000005596 | CID000005625 | CID000005650 | CID000005656 |
| CID000005718 | CID000005732 | CID000005746 | CID000006476 | CID000007029 |
| CID000008612 | CID000014888 | CID000016362 | CID000023897 | CID000027661 |
| CID000028112 | CID000031477 | CID000039507 | CID000041317 | CID000042615 |
| CID000044564 | CID000051263 | CID000056959 | CID000059708 | CID000060795 |
| CID000060865 | CID000062867 | CID000062924 | CID000064147 | CID000068740 |
| CID000068844 | CID000071273 | CID000071616 | CID000093860 | CID000096312 |
| CID000104865 | CID000110634 | CID000110635 | CID000115237 | CID000119607 |
| CID000125017 | CID000125889 | CID000130881 | CID000147912 | CID000166548 |
| CID000170361 | CID000216326 | CID002761171 | CID003002190 | CID004659569 |
| CID005229711 | CID005281007 | CID005282226 | CID005311027 | CID005353894 |
| CID005362420 |              |              |              |              |

(51)  $S_{51}$ : 268 drug compounds having side effect "Flatulence"

|              |              |              |              |              |
|--------------|--------------|--------------|--------------|--------------|
| CID000000159 | CID000000444 | CID000000450 | CID000000598 | CID000000738 |
| CID000000767 | CID000000937 | CID000000942 | CID000001690 | CID000001775 |
| CID000001935 | CID000001972 | CID000001978 | CID000002022 | CID000002083 |
| CID000002162 | CID000002170 | CID000002182 | CID000002250 | CID000002269 |
| CID000002284 | CID000002311 | CID000002375 | CID000002462 | CID000002476 |
| CID000002477 | CID000002487 | CID000002512 | CID000002559 | CID000002575 |
| CID000002585 | CID000002609 | CID000002654 | CID000002656 | CID000002658 |
| CID000002662 | CID000002675 | CID000002676 | CID000002678 | CID000002751 |
| CID000002764 | CID000002769 | CID000002771 | CID000002786 | CID000002801 |
| CID000002802 | CID000002806 | CID000002895 | CID000002909 | CID000003032 |
| CID000003043 | CID000003059 | CID000003075 | CID000003108 | CID000003114 |
| CID000003121 | CID000003148 | CID000003152 | CID000003157 | CID000003261 |
| CID000003285 | CID000003308 | CID000003324 | CID000003333 | CID000003339 |
| CID000003342 | CID000003345 | CID000003348 | CID000003355 | CID000003365 |
| CID000003386 | CID000003394 | CID000003403 | CID000003404 | CID000003405 |
| CID000003414 | CID000003417 | CID000003419 | CID000003446 | CID000003449 |
| CID000003454 | CID000003463 | CID000003475 | CID000003478 | CID000003510 |
| CID000003639 | CID000003648 | CID000003672 | CID000003702 | CID000003715 |
| CID000003730 | CID000003749 | CID000003750 | CID000003793 | CID000003825 |
| CID000003826 | CID000003878 | CID000003883 | CID000003899 | CID000003911 |
| CID000003929 | CID000003937 | CID000003948 | CID000003954 | CID000003961 |
| CID000003962 | CID000004036 | CID000004044 | CID000004075 | CID000004091 |
| CID000004138 | CID000004171 | CID000004173 | CID000004195 | CID000004205 |
| CID000004236 | CID000004253 | CID000004259 | CID000004409 | CID000004411 |
| CID000004428 | CID000004449 | CID000004451 | CID000004485 | CID000004509 |
| CID000004513 | CID000004539 | CID000004542 | CID000004583 | CID000004585 |
| CID000004599 | CID000004609 | CID000004614 | CID000004634 | CID000004635 |
| CID000004679 | CID000004691 | CID000004739 | CID000004740 | CID000004745 |
| CID000004819 | CID000004828 | CID000004856 | CID000004873 | CID000004885 |
| CID000004889 | CID000004893 | CID000004920 | CID000004932 | CID000004991 |
| CID000005002 | CID000005005 | CID000005029 | CID000005035 | CID000005040 |
| CID000005070 | CID000005073 | CID000005076 | CID000005077 | CID000005078 |
| CID000005090 | CID000005095 | CID000005155 | CID000005195 | CID000005203 |
| CID000005210 | CID000005212 | CID000005245 | CID000005253 | CID000005291 |
| CID000005344 | CID000005352 | CID000005358 | CID000005372 | CID000005379 |
| CID000005401 | CID000005402 | CID000005426 | CID000005466 | CID000005472 |
| CID000005487 | CID000005508 | CID000005512 | CID000005514 | CID000005523 |
| CID000005525 | CID000005533 | CID000005538 | CID000005596 | CID000005625 |
| CID000005645 | CID000005647 | CID000005650 | CID000005656 | CID000005718 |
| CID000005719 | CID000005726 | CID000005732 | CID000005734 | CID000006691 |
| CID000018140 | CID000019090 | CID000027661 | CID000027686 | CID000027991 |
| CID000028112 | CID000034312 | CID000039042 | CID000040976 | CID000041744 |
| CID000041774 | CID000042615 | CID000047725 | CID000051577 | CID000051634 |

|              |              |              |              |              |
|--------------|--------------|--------------|--------------|--------------|
| CID000054454 | CID000054547 | CID000054688 | CID000060184 | CID000060613 |
| CID000060787 | CID000060795 | CID000060871 | CID000062816 | CID000062959 |
| CID000064147 | CID000065027 | CID000065999 | CID000071158 | CID000071616 |
| CID000072054 | CID000072938 | CID000077992 | CID000077993 | CID000082146 |
| CID000104865 | CID000119607 | CID000123620 | CID000125889 | CID000147912 |
| CID000148192 | CID000148211 | CID000150610 | CID000151165 | CID000158440 |
| CID000160051 | CID000170361 | CID000176870 | CID000213039 | CID000216326 |
| CID000444013 | CID003002190 | CID003081884 | CID004183806 | CID004659568 |
| CID004659569 | CID005282044 | CID005329102 | CID005361912 | CID005362070 |
| CID005381226 | CID005481350 | CID005487301 | CID006398525 | CID006398970 |
| CID006436173 | CID006918453 | CID009571074 |              |              |

(52)  $S_{52}$ : 266 drug compounds having side effect "Flushing"

|              |              |              |              |              |
|--------------|--------------|--------------|--------------|--------------|
| CID000000158 | CID000000159 | CID000000187 | CID000000191 | CID000000214 |
| CID000000232 | CID000000444 | CID000000581 | CID000000598 | CID000000807 |
| CID000000853 | CID000000888 | CID000000937 | CID000000942 | CID000001065 |
| CID000001935 | CID000001972 | CID000001978 | CID000001986 | CID000002083 |
| CID000002092 | CID000002140 | CID000002141 | CID000002148 | CID000002156 |
| CID000002162 | CID000002187 | CID000002215 | CID000002249 | CID000002267 |
| CID000002274 | CID000002284 | CID000002311 | CID000002349 | CID000002369 |
| CID000002370 | CID000002375 | CID000002405 | CID000002431 | CID000002462 |
| CID000002476 | CID000002478 | CID000002512 | CID000002520 | CID000002541 |
| CID000002550 | CID000002551 | CID000002554 | CID000002576 | CID000002578 |
| CID000002637 | CID000002656 | CID000002662 | CID000002676 | CID000002678 |
| CID000002751 | CID000002764 | CID000002771 | CID000002800 | CID000002801 |
| CID000002907 | CID000002909 | CID000002949 | CID000002958 | CID000002978 |
| CID000002995 | CID000003007 | CID000003019 | CID000003032 | CID000003059 |
| CID000003066 | CID000003075 | CID000003108 | CID000003143 | CID000003148 |
| CID000003151 | CID000003156 | CID000003157 | CID000003158 | CID000003203 |
| CID000003222 | CID000003261 | CID000003308 | CID000003310 | CID000003325 |
| CID000003333 | CID000003340 | CID000003345 | CID000003348 | CID000003355 |
| CID000003373 | CID000003386 | CID000003393 | CID000003403 | CID000003406 |
| CID000003414 | CID000003419 | CID000003478 | CID000003636 | CID000003637 |
| CID000003648 | CID000003676 | CID000003696 | CID000003702 | CID000003715 |
| CID000003724 | CID000003734 | CID000003737 | CID000003739 | CID000003741 |
| CID000003742 | CID000003746 | CID000003749 | CID000003750 | CID000003779 |
| CID000003784 | CID000003793 | CID000003826 | CID000003869 | CID000003878 |
| CID000003902 | CID000003911 | CID000003937 | CID000003948 | CID000003961 |
| CID000003962 | CID000004011 | CID000004046 | CID000004053 | CID000004058 |
| CID000004091 | CID000004095 | CID000004107 | CID000004158 | CID000004163 |
| CID000004168 | CID000004171 | CID000004173 | CID000004195 | CID000004211 |
| CID000004253 | CID000004419 | CID000004425 | CID000004428 | CID000004449 |
| CID000004473 | CID000004485 | CID000004493 | CID000004497 | CID000004510 |
| CID000004543 | CID000004583 | CID000004594 | CID000004595 | CID000004609 |

|              |              |              |              |              |
|--------------|--------------|--------------|--------------|--------------|
| CID000004675 | CID000004736 | CID000004740 | CID000004812 | CID000004819 |
| CID000004828 | CID000004845 | CID000004889 | CID000004893 | CID000004911 |
| CID000004913 | CID000004915 | CID000004920 | CID000004927 | CID000004932 |
| CID000004943 | CID000004946 | CID000004976 | CID000005035 | CID000005038 |
| CID000005064 | CID000005070 | CID000005073 | CID000005077 | CID000005078 |
| CID000005090 | CID000005095 | CID000005212 | CID000005291 | CID000005344 |
| CID000005352 | CID000005358 | CID000005372 | CID000005376 | CID000005394 |
| CID000005396 | CID000005408 | CID000005426 | CID000005430 | CID000005479 |
| CID000005504 | CID000005512 | CID000005514 | CID000005523 | CID000005525 |
| CID000005538 | CID000005584 | CID000005596 | CID000005651 | CID000005672 |
| CID000005718 | CID000005732 | CID000005775 | CID000014888 | CID000018140 |
| CID000020585 | CID000027661 | CID000027991 | CID000032800 | CID000034312 |
| CID000039860 | CID000040976 | CID000041317 | CID000042615 | CID000047319 |
| CID000047320 | CID000054454 | CID000059768 | CID000060184 | CID000060198 |
| CID000060754 | CID000060787 | CID000060795 | CID000060953 | CID000062959 |
| CID000065999 | CID000068740 | CID000072938 | CID000077992 | CID000077993 |
| CID000093860 | CID000104741 | CID000104865 | CID000110634 | CID000110635 |
| CID000119182 | CID000119607 | CID000125017 | CID000147912 | CID000150610 |
| CID000151165 | CID000166548 | CID000197712 | CID000216239 | CID000216326 |
| CID000450096 | CID000477468 | CID003002190 | CID003062316 | CID003081884 |
| CID003086672 | CID004659568 | CID005229711 | CID005281007 | CID005311181 |
| CID005362420 | CID005381226 | CID005487301 | CID006436173 | CID006447131 |
| CID011947681 |              |              |              |              |

(53)  $S_{53}$ : 259 drug compounds having side effect "Pharyngitis"

|              |              |              |              |              |
|--------------|--------------|--------------|--------------|--------------|
| CID000000085 | CID000000158 | CID000000159 | CID000000214 | CID000000444 |
| CID000000450 | CID000000581 | CID000000598 | CID000000738 | CID000000942 |
| CID000001134 | CID000001690 | CID000001775 | CID000001935 | CID000001971 |
| CID000001972 | CID000001978 | CID000002019 | CID000002083 | CID000002092 |
| CID000002182 | CID000002187 | CID000002216 | CID000002250 | CID000002267 |
| CID000002308 | CID000002311 | CID000002369 | CID000002375 | CID000002405 |
| CID000002435 | CID000002462 | CID000002476 | CID000002478 | CID000002487 |
| CID000002520 | CID000002541 | CID000002550 | CID000002554 | CID000002585 |
| CID000002662 | CID000002676 | CID000002678 | CID000002713 | CID000002751 |
| CID000002764 | CID000002769 | CID000002771 | CID000002786 | CID000002801 |
| CID000002802 | CID000002895 | CID000002909 | CID000002955 | CID000003032 |
| CID000003066 | CID000003075 | CID000003108 | CID000003121 | CID000003143 |
| CID000003152 | CID000003154 | CID000003157 | CID000003241 | CID000003261 |
| CID000003285 | CID000003308 | CID000003333 | CID000003339 | CID000003345 |
| CID000003367 | CID000003379 | CID000003386 | CID000003394 | CID000003403 |
| CID000003404 | CID000003406 | CID000003410 | CID000003414 | CID000003417 |
| CID000003419 | CID000003446 | CID000003461 | CID000003475 | CID000003478 |
| CID000003648 | CID000003672 | CID000003702 | CID000003706 | CID000003724 |
| CID000003736 | CID000003746 | CID000003749 | CID000003793 | CID000003825 |

|              |              |              |              |              |
|--------------|--------------|--------------|--------------|--------------|
| CID000003827 | CID000003878 | CID000003883 | CID000003899 | CID000003911 |
| CID000003915 | CID000003929 | CID000003937 | CID000003948 | CID000003961 |
| CID000004075 | CID000004112 | CID000004158 | CID000004173 | CID000004178 |
| CID000004205 | CID000004212 | CID000004236 | CID000004259 | CID000004264 |
| CID000004428 | CID000004449 | CID000004451 | CID000004485 | CID000004510 |
| CID000004513 | CID000004542 | CID000004583 | CID000004585 | CID000004594 |
| CID000004609 | CID000004634 | CID000004635 | CID000004679 | CID000004691 |
| CID000004739 | CID000004745 | CID000004819 | CID000004829 | CID000004885 |
| CID000004889 | CID000004920 | CID000004943 | CID000004946 | CID000005002 |
| CID000005005 | CID000005035 | CID000005040 | CID000005064 | CID000005073 |
| CID000005076 | CID000005077 | CID000005078 | CID000005090 | CID000005095 |
| CID000005152 | CID000005155 | CID000005195 | CID000005203 | CID000005206 |
| CID000005210 | CID000005212 | CID000005245 | CID000005291 | CID000005372 |
| CID000005376 | CID000005379 | CID000005394 | CID000005401 | CID000005426 |
| CID000005466 | CID000005479 | CID000005487 | CID000005496 | CID000005514 |
| CID000005515 | CID000005523 | CID000005525 | CID000005538 | CID000005544 |
| CID000005625 | CID000005636 | CID000005645 | CID000005650 | CID000005656 |
| CID000005718 | CID000005731 | CID000005732 | CID000005734 | CID000005735 |
| CID000010631 | CID000012536 | CID000013342 | CID000019090 | CID000025419 |
| CID000027661 | CID000027686 | CID000032797 | CID000034312 | CID000039042 |
| CID000039507 | CID000039860 | CID000040976 | CID000041317 | CID000042113 |
| CID000047725 | CID000050294 | CID000054786 | CID000057469 | CID000059708 |
| CID000059768 | CID000060184 | CID000060198 | CID000060613 | CID000060787 |
| CID000060795 | CID000060843 | CID000060852 | CID000060865 | CID000060871 |
| CID000060953 | CID000062924 | CID000064147 | CID000065999 | CID000068844 |
| CID000071158 | CID000071616 | CID000072054 | CID000072938 | CID000077992 |
| CID000077993 | CID000082146 | CID000083786 | CID000104741 | CID000110634 |
| CID000110635 | CID000119607 | CID000123606 | CID000123620 | CID000124087 |
| CID000125889 | CID000130881 | CID000147912 | CID000150311 | CID000150610 |
| CID000151165 | CID000160051 | CID000197712 | CID000216326 | CID000444013 |
| CID000444033 | CID003081884 | CID004659568 | CID004659569 | CID005281104 |
| CID005282044 | CID005311027 | CID005311297 | CID005362070 | CID005362420 |
| CID005487301 | CID005493381 | CID006436173 | CID006447131 |              |

(54)  $S_{54}$  : 262 drug compounds having side effect “Angioedema”

|              |              |              |              |              |
|--------------|--------------|--------------|--------------|--------------|
| CID000000119 | CID000000298 | CID000000444 | CID000000450 | CID000000581 |
| CID000000767 | CID000000772 | CID000000807 | CID000000853 | CID000000937 |
| CID000001065 | CID000001972 | CID000002022 | CID000002083 | CID000002088 |
| CID000002092 | CID000002140 | CID000002148 | CID000002156 | CID000002162 |
| CID000002177 | CID000002187 | CID000002244 | CID000002250 | CID000002269 |
| CID000002274 | CID000002308 | CID000002349 | CID000002366 | CID000002375 |
| CID000002405 | CID000002462 | CID000002474 | CID000002476 | CID000002477 |
| CID000002520 | CID000002541 | CID000002554 | CID000002576 | CID000002585 |
| CID000002609 | CID000002610 | CID000002631 | CID000002637 | CID000002646 |



|              |              |              |              |              |
|--------------|--------------|--------------|--------------|--------------|
| CID000002650 | CID000002658 | CID000002662 | CID000002666 | CID000002675 |
| CID000002676 | CID000002678 | CID000002708 | CID000002726 | CID000002733 |
| CID000002762 | CID000002764 | CID000002769 | CID000002771 | CID000002803 |
| CID000002806 | CID000002895 | CID000002909 | CID000002973 | CID000002983 |
| CID000003003 | CID000003007 | CID000003032 | CID000003040 | CID000003059 |
| CID000003075 | CID000003108 | CID000003114 | CID000003148 | CID000003154 |
| CID000003285 | CID000003305 | CID000003308 | CID000003325 | CID000003333 |
| CID000003342 | CID000003348 | CID000003365 | CID000003372 | CID000003386 |
| CID000003394 | CID000003403 | CID000003404 | CID000003410 | CID000003417 |
| CID000003446 | CID000003463 | CID000003488 | CID000003512 | CID000003636 |
| CID000003640 | CID000003652 | CID000003672 | CID000003676 | CID000003702 |
| CID000003715 | CID000003736 | CID000003737 | CID000003741 | CID000003742 |
| CID000003746 | CID000003749 | CID000003784 | CID000003793 | CID000003826 |
| CID000003869 | CID000003878 | CID000003899 | CID000003928 | CID000003929 |
| CID000003948 | CID000003954 | CID000003961 | CID000003962 | CID000004030 |
| CID000004044 | CID000004062 | CID000004064 | CID000004075 | CID000004078 |
| CID000004107 | CID000004158 | CID000004168 | CID000004173 | CID000004189 |
| CID000004200 | CID000004236 | CID000004259 | CID000004409 | CID000004421 |
| CID000004428 | CID000004449 | CID000004463 | CID000004485 | CID000004509 |
| CID000004539 | CID000004542 | CID000004583 | CID000004585 | CID000004594 |
| CID000004595 | CID000004599 | CID000004607 | CID000004609 | CID000004614 |
| CID000004645 | CID000004679 | CID000004691 | CID000004737 | CID000004740 |
| CID000004748 | CID000004856 | CID000004889 | CID000004894 | CID000004913 |
| CID000004914 | CID000004917 | CID000004920 | CID000004943 | CID000005002 |
| CID000005029 | CID000005039 | CID000005040 | CID000005070 | CID000005073 |
| CID000005078 | CID000005090 | CID000005095 | CID000005152 | CID000005193 |
| CID000005203 | CID000005210 | CID000005245 | CID000005291 | CID000005297 |
| CID000005344 | CID000005352 | CID000005358 | CID000005372 | CID000005376 |
| CID000005379 | CID000005402 | CID000005412 | CID000005426 | CID000005430 |
| CID000005452 | CID000005472 | CID000005478 | CID000005479 | CID000005512 |
| CID000005515 | CID000005523 | CID000005544 | CID000005566 | CID000005596 |
| CID000005625 | CID000005647 | CID000005650 | CID000005665 | CID000005672 |
| CID000005717 | CID000005726 | CID000005731 | CID000005732 | CID000005735 |
| CID000008612 | CID000010631 | CID000018140 | CID000020585 | CID000027686 |
| CID000028112 | CID000034312 | CID000041317 | CID000041781 | CID000054454 |
| CID000057469 | CID000060613 | CID000060795 | CID000062867 | CID000062924 |
| CID000062959 | CID000065999 | CID000068740 | CID000071273 | CID000071301 |
| CID000071329 | CID000071616 | CID000072054 | CID000074989 | CID000077999 |
| CID000093860 | CID000104741 | CID000104865 | CID000119607 | CID000123620 |
| CID000123631 | CID000125889 | CID000130881 | CID000148192 | CID000150310 |
| CID000150311 | CID000151165 | CID000152945 | CID000166548 | CID000170361 |
| CID000197712 | CID000213039 | CID000444033 | CID003002190 | CID003081884 |
| CID005311297 | CID005493381 | CID005493444 | CID006398525 | CID006436173 |
| CID006447131 | CID006918453 |              |              |              |

(55) S<sub>55</sub>: 260 drug compounds having side effect “Jaundice”

|              |              |              |              |              |
|--------------|--------------|--------------|--------------|--------------|
| CID00000444  | CID00000450  | CID00000596  | CID00000937  | CID000001065 |
| CID000001690 | CID000001972 | CID000001986 | CID000002022 | CID000002092 |
| CID000002099 | CID000002118 | CID000002160 | CID000002162 | CID000002170 |
| CID000002171 | CID000002179 | CID000002250 | CID000002269 | CID000002274 |
| CID000002311 | CID000002315 | CID000002375 | CID000002478 | CID000002520 |
| CID000002550 | CID000002554 | CID000002609 | CID000002631 | CID000002637 |
| CID000002646 | CID000002650 | CID000002654 | CID000002658 | CID000002662 |
| CID000002666 | CID000002675 | CID000002676 | CID000002678 | CID000002708 |
| CID000002712 | CID000002720 | CID000002726 | CID000002727 | CID000002732 |
| CID000002764 | CID000002771 | CID000002786 | CID000002794 | CID000002818 |
| CID000002895 | CID000002907 | CID000002913 | CID000002949 | CID000002995 |
| CID000003015 | CID000003016 | CID000003032 | CID000003059 | CID000003114 |
| CID000003121 | CID000003143 | CID000003152 | CID000003157 | CID000003158 |
| CID000003203 | CID000003222 | CID000003278 | CID000003285 | CID000003308 |
| CID000003324 | CID000003325 | CID000003339 | CID000003342 | CID000003345 |
| CID000003355 | CID000003365 | CID000003366 | CID000003372 | CID000003386 |
| CID000003387 | CID000003394 | CID000003397 | CID000003403 | CID000003404 |
| CID000003417 | CID000003419 | CID000003440 | CID000003446 | CID000003454 |
| CID000003463 | CID000003475 | CID000003476 | CID000003478 | CID000003488 |
| CID000003510 | CID000003559 | CID000003639 | CID000003647 | CID000003648 |
| CID000003672 | CID000003675 | CID000003696 | CID000003698 | CID000003702 |
| CID000003706 | CID000003715 | CID000003749 | CID000003750 | CID000003763 |
| CID000003767 | CID000003793 | CID000003825 | CID000003826 | CID000003869 |
| CID000003877 | CID000003883 | CID000003899 | CID000003928 | CID000003929 |
| CID000003937 | CID000003956 | CID000003958 | CID000003961 | CID000003962 |
| CID000003964 | CID000004011 | CID000004033 | CID000004036 | CID000004044 |
| CID000004053 | CID000004060 | CID000004075 | CID000004078 | CID000004107 |
| CID000004121 | CID000004138 | CID000004160 | CID000004168 | CID000004170 |
| CID000004171 | CID000004200 | CID000004212 | CID000004259 | CID000004409 |
| CID000004451 | CID000004463 | CID000004485 | CID000004497 | CID000004509 |
| CID000004513 | CID000004536 | CID000004539 | CID000004543 | CID000004547 |
| CID000004583 | CID000004585 | CID000004594 | CID000004614 | CID000004616 |
| CID000004638 | CID000004679 | CID000004691 | CID000004723 | CID000004740 |
| CID000004745 | CID000004748 | CID000004856 | CID000004870 | CID000004889 |
| CID000004915 | CID000004917 | CID000004920 | CID000004927 | CID000004932 |
| CID000004976 | CID000005029 | CID000005038 | CID000005039 | CID000005070 |
| CID000005073 | CID000005076 | CID000005090 | CID000005203 | CID000005206 |
| CID000005291 | CID000005344 | CID000005352 | CID000005372 | CID000005401 |
| CID000005402 | CID000005408 | CID000005426 | CID000005430 | CID000005452 |
| CID000005454 | CID000005472 | CID000005487 | CID000005503 | CID000005505 |
| CID000005516 | CID000005533 | CID000005546 | CID000005556 | CID000005566 |
| CID000005578 | CID000005584 | CID000005591 | CID000005625 | CID000005656 |

|              |              |              |              |              |
|--------------|--------------|--------------|--------------|--------------|
| CID000005718 | CID000005726 | CID000005731 | CID000005734 | CID000005878 |
| CID000006691 | CID000010100 | CID000010631 | CID000041317 | CID000041774 |
| CID000054454 | CID000054688 | CID000060184 | CID000060613 | CID000060787 |
| CID000060795 | CID000060953 | CID000062867 | CID000062959 | CID000064147 |
| CID000065027 | CID000071273 | CID000071616 | CID000072938 | CID000083786 |
| CID000104865 | CID000119182 | CID000122316 | CID000125889 | CID000130881 |
| CID000147912 | CID000148192 | CID000150610 | CID000213039 | CID000216239 |
| CID000443871 | CID000477468 | CID000657298 | CID001349907 | CID002761171 |
| CID003002190 | CID005282044 | CID005329102 | CID005353980 | CID005362070 |
| CID005381226 | CID005473385 | CID006398970 | CID006918453 | CID011954225 |

(56)  $S_{56}$ : 257 drug compounds having side effect "Rhinitis"

|              |              |              |              |              |
|--------------|--------------|--------------|--------------|--------------|
| CID000000085 | CID000000159 | CID000000214 | CID000000444 | CID000000450 |
| CID000000453 | CID000000598 | CID000000738 | CID000000750 | CID000000772 |
| CID000000807 | CID000000937 | CID000000942 | CID000001690 | CID000001775 |
| CID000001935 | CID000001972 | CID000001978 | CID000002083 | CID000002092 |
| CID000002140 | CID000002162 | CID000002182 | CID000002187 | CID000002216 |
| CID000002250 | CID000002269 | CID000002284 | CID000002311 | CID000002369 |
| CID000002375 | CID000002405 | CID000002435 | CID000002462 | CID000002476 |
| CID000002478 | CID000002487 | CID000002512 | CID000002520 | CID000002541 |
| CID000002550 | CID000002554 | CID000002585 | CID000002609 | CID000002662 |
| CID000002676 | CID000002678 | CID000002713 | CID000002751 | CID000002764 |
| CID000002769 | CID000002771 | CID000002801 | CID000002802 | CID000002806 |
| CID000002891 | CID000002909 | CID000002958 | CID000002978 | CID000003016 |
| CID000003032 | CID000003066 | CID000003075 | CID000003108 | CID000003121 |
| CID000003152 | CID000003157 | CID000003219 | CID000003241 | CID000003261 |
| CID000003285 | CID000003308 | CID000003339 | CID000003345 | CID000003348 |
| CID000003350 | CID000003386 | CID000003394 | CID000003403 | CID000003404 |
| CID000003410 | CID000003414 | CID000003417 | CID000003419 | CID000003446 |
| CID000003449 | CID000003454 | CID000003461 | CID000003475 | CID000003478 |
| CID000003510 | CID000003519 | CID000003648 | CID000003672 | CID000003702 |
| CID000003724 | CID000003734 | CID000003736 | CID000003749 | CID000003750 |
| CID000003793 | CID000003825 | CID000003826 | CID000003827 | CID000003878 |
| CID000003883 | CID000003899 | CID000003911 | CID000003937 | CID000003948 |
| CID000003956 | CID000003961 | CID000004075 | CID000004091 | CID000004158 |
| CID000004159 | CID000004171 | CID000004173 | CID000004200 | CID000004201 |
| CID000004205 | CID000004212 | CID000004236 | CID000004253 | CID000004259 |
| CID000004264 | CID000004449 | CID000004451 | CID000004473 | CID000004485 |
| CID000004493 | CID000004510 | CID000004513 | CID000004542 | CID000004547 |
| CID000004583 | CID000004585 | CID000004594 | CID000004609 | CID000004634 |
| CID000004635 | CID000004679 | CID000004691 | CID000004739 | CID000004745 |
| CID000004819 | CID000004885 | CID000004889 | CID000004893 | CID000004920 |
| CID000004932 | CID000005002 | CID000005005 | CID000005035 | CID000005040 |
| CID000005064 | CID000005070 | CID000005073 | CID000005076 | CID000005077 |

|              |              |              |              |              |
|--------------|--------------|--------------|--------------|--------------|
| CID000005095 | CID000005152 | CID000005155 | CID000005195 | CID000005203 |
| CID000005210 | CID000005212 | CID000005245 | CID000005291 | CID000005372 |
| CID000005401 | CID000005419 | CID000005426 | CID000005466 | CID000005487 |
| CID000005496 | CID000005514 | CID000005523 | CID000005544 | CID000005596 |
| CID000005625 | CID000005636 | CID000005645 | CID000005650 | CID000005656 |
| CID000005726 | CID000005731 | CID000005732 | CID000005734 | CID000005735 |
| CID000009034 | CID000027661 | CID000031477 | CID000034312 | CID000039507 |
| CID000040976 | CID000041317 | CID000041781 | CID000042615 | CID000050294 |
| CID000054547 | CID000054688 | CID000054786 | CID000057469 | CID000057537 |
| CID000059708 | CID000060184 | CID000060198 | CID000060613 | CID000060714 |
| CID000060754 | CID000060787 | CID000060795 | CID000060865 | CID000060877 |
| CID000060953 | CID000062819 | CID000062959 | CID000065999 | CID000068844 |
| CID000071158 | CID000071273 | CID000071616 | CID000072054 | CID000074989 |
| CID000077992 | CID000077993 | CID000082146 | CID000083786 | CID000110634 |
| CID000115237 | CID000119607 | CID000122316 | CID000123606 | CID000123620 |
| CID000125889 | CID000130881 | CID000147912 | CID000150610 | CID000160051 |
| CID000176168 | CID000197712 | CID000216326 | CID000444013 | CID000444033 |
| CID003081884 | CID004659569 | CID005281104 | CID005282226 | CID005311027 |
| CID005362070 | CID005493381 | CID005493444 | CID006398525 | CID006436173 |
| CID006447131 | CID009571074 |              |              |              |

(57)  $S_{57}$  : 252 drug compounds having side effect "Erythema"

|              |              |              |              |              |
|--------------|--------------|--------------|--------------|--------------|
| CID000000137 | CID000000143 | CID000000214 | CID000000450 | CID000000581 |
| CID000000598 | CID000000612 | CID000000772 | CID000000807 | CID000000838 |
| CID000000942 | CID000001546 | CID000001972 | CID000002022 | CID000002140 |
| CID000002156 | CID000002162 | CID000002171 | CID000002216 | CID000002269 |
| CID000002274 | CID000002369 | CID000002405 | CID000002435 | CID000002474 |
| CID000002477 | CID000002478 | CID000002484 | CID000002487 | CID000002522 |
| CID000002554 | CID000002585 | CID000002622 | CID000002646 | CID000002658 |
| CID000002662 | CID000002708 | CID000002713 | CID000002749 | CID000002762 |
| CID000002764 | CID000002786 | CID000002800 | CID000002803 | CID000002812 |
| CID000002818 | CID000002907 | CID000002951 | CID000002955 | CID000002973 |
| CID000003000 | CID000003003 | CID000003009 | CID000003032 | CID000003075 |
| CID000003121 | CID000003143 | CID000003152 | CID000003154 | CID000003198 |
| CID000003203 | CID000003255 | CID000003310 | CID000003333 | CID000003339 |
| CID000003345 | CID000003372 | CID000003381 | CID000003385 | CID000003386 |
| CID000003397 | CID000003403 | CID000003405 | CID000003467 | CID000003475 |
| CID000003476 | CID000003478 | CID000003488 | CID000003494 | CID000003512 |
| CID000003553 | CID000003639 | CID000003652 | CID000003657 | CID000003672 |
| CID000003676 | CID000003685 | CID000003702 | CID000003715 | CID000003724 |
| CID000003736 | CID000003737 | CID000003741 | CID000003742 | CID000003749 |
| CID000003793 | CID000003821 | CID000003823 | CID000003869 | CID000003877 |
| CID000003878 | CID000003890 | CID000003911 | CID000003915 | CID000003929 |
| CID000003937 | CID000003961 | CID000003998 | CID000004046 | CID000004062 |

|              |              |              |              |              |
|--------------|--------------|--------------|--------------|--------------|
| CID000004075 | CID000004078 | CID000004091 | CID000004095 | CID000004114 |
| CID000004158 | CID000004189 | CID000004192 | CID000004200 | CID000004201 |
| CID000004212 | CID000004259 | CID000004264 | CID000004421 | CID000004440 |
| CID000004451 | CID000004463 | CID000004510 | CID000004539 | CID000004583 |
| CID000004594 | CID000004603 | CID000004609 | CID000004623 | CID000004634 |
| CID000004679 | CID000004691 | CID000004725 | CID000004748 | CID000004812 |
| CID000004834 | CID000004856 | CID000004865 | CID000004885 | CID000004889 |
| CID000004894 | CID000004900 | CID000004914 | CID000004917 | CID000004927 |
| CID000004932 | CID000004943 | CID000004946 | CID000005038 | CID000005039 |
| CID000005076 | CID000005077 | CID000005078 | CID000005090 | CID000005195 |
| CID000005212 | CID000005300 | CID000005320 | CID000005358 | CID000005372 |
| CID000005376 | CID000005379 | CID000005394 | CID000005402 | CID000005408 |
| CID000005452 | CID000005478 | CID000005496 | CID000005503 | CID000005505 |
| CID000005523 | CID000005538 | CID000005544 | CID000005566 | CID000005578 |
| CID000005625 | CID000005647 | CID000005656 | CID000005672 | CID000005726 |
| CID000005731 | CID000005746 | CID000007029 | CID000007187 | CID000008612 |
| CID000009034 | CID000010631 | CID000012536 | CID000014888 | CID000027686 |
| CID000027991 | CID000030623 | CID000031378 | CID000032797 | CID000038904 |
| CID000039042 | CID000040159 | CID000041317 | CID000041693 | CID000041774 |
| CID000047319 | CID000047641 | CID000047725 | CID000048175 | CID000054786 |
| CID000057469 | CID000059768 | CID000060164 | CID000060184 | CID000060787 |
| CID000060852 | CID000060953 | CID000062867 | CID000062924 | CID000065863 |
| CID000065999 | CID000071273 | CID000082146 | CID000093860 | CID000104865 |
| CID000110634 | CID000119182 | CID000123606 | CID000123620 | CID000124087 |
| CID000147912 | CID000148211 | CID000150610 | CID000158440 | CID000166548 |
| CID000170361 | CID000176870 | CID000216239 | CID000216326 | CID000222786 |
| CID000477468 | CID003062316 | CID003081884 | CID004479097 | CID004630253 |
| CID005229711 | CID005311027 | CID005329102 | CID005353980 | CID006398970 |
| CID006447131 | CID011954225 |              |              |              |

(58)  $S_{58}$ : 256 drug compounds having side effect "Agitation"

|              |              |              |              |              |
|--------------|--------------|--------------|--------------|--------------|
| CID000000159 | CID000000450 | CID000000596 | CID000000767 | CID000000807 |
| CID000000838 | CID000000942 | CID000001065 | CID000001125 | CID000001206 |
| CID000001690 | CID000001775 | CID000001935 | CID000001972 | CID000002022 |
| CID000002083 | CID000002130 | CID000002140 | CID000002153 | CID000002160 |
| CID000002162 | CID000002171 | CID000002269 | CID000002284 | CID000002315 |
| CID000002349 | CID000002381 | CID000002405 | CID000002441 | CID000002462 |
| CID000002474 | CID000002476 | CID000002478 | CID000002487 | CID000002524 |
| CID000002554 | CID000002564 | CID000002576 | CID000002578 | CID000002609 |
| CID000002654 | CID000002666 | CID000002678 | CID000002708 | CID000002720 |
| CID000002725 | CID000002732 | CID000002756 | CID000002762 | CID000002764 |
| CID000002781 | CID000002801 | CID000002802 | CID000002803 | CID000002818 |
| CID000002895 | CID000002905 | CID000002907 | CID000002909 | CID000002913 |
| CID000002995 | CID000003007 | CID000003075 | CID000003100 | CID000003121 |

CID000003148 CID000003152 CID000003157 CID000003168 CID000003203  
 CID000003261 CID000003285 CID000003325 CID000003345 CID000003348  
 CID000003367 CID000003372 CID000003373 CID000003393 CID000003404  
 CID000003406 CID000003410 CID000003414 CID000003440 CID000003446  
 CID000003449 CID000003454 CID000003510 CID000003519 CID000003559  
 CID000003639 CID000003647 CID000003648 CID000003661 CID000003675  
 CID000003676 CID000003690 CID000003696 CID000003702 CID000003724  
 CID000003736 CID000003739 CID000003741 CID000003878 CID000003883  
 CID000003911 CID000003948 CID000003958 CID000003961 CID000003964  
 CID000004011 CID000004046 CID000004054 CID000004058 CID000004062  
 CID000004078 CID000004095 CID000004121 CID000004158 CID000004168  
 CID000004170 CID000004192 CID000004236 CID000004253 CID000004259  
 CID000004409 CID000004419 CID000004425 CID000004428 CID000004440  
 CID000004506 CID000004510 CID000004539 CID000004543 CID000004583  
 CID000004594 CID000004595 CID000004601 CID000004603 CID000004635  
 CID000004727 CID000004737 CID000004740 CID000004745 CID000004748  
 CID000004771 CID000004819 CID000004870 CID000004885 CID000004914  
 CID000004917 CID000004927 CID000004943 CID000004976 CID000004991  
 CID000005002 CID000005029 CID000005038 CID000005039 CID000005040  
 CID000005064 CID000005070 CID000005071 CID000005073 CID000005076  
 CID000005077 CID000005078 CID000005095 CID000005193 CID000005206  
 CID000005210 CID000005212 CID000005358 CID000005372 CID000005379  
 CID000005391 CID000005394 CID000005426 CID000005452 CID000005454  
 CID000005466 CID000005487 CID000005514 CID000005523 CID000005525  
 CID000005538 CID000005556 CID000005566 CID000005572 CID000005584  
 CID000005625 CID000005647 CID000005665 CID000005718 CID000005719  
 CID000005721 CID000005731 CID000005732 CID000005734 CID000005735  
 CID000005978 CID000007029 CID000008612 CID000009034 CID000009433  
 CID000010631 CID000014888 CID000020585 CID000023897 CID000027661  
 CID000027991 CID000028112 CID000034312 CID000042113 CID000051263  
 CID000057469 CID000059708 CID000059768 CID000060184 CID000060612  
 CID000060613 CID000060787 CID000062867 CID000062924 CID000062959  
 CID000064147 CID000068740 CID000071158 CID000071273 CID000071616  
 CID000077992 CID000077993 CID000082146 CID000093860 CID000115237  
 CID000122316 CID000123606 CID000124087 CID000125889 CID000130881  
 CID000148192 CID000150610 CID000158440 CID000170361 CID000216326  
 CID000444013 CID000450096 CID002761171 CID003081884 CID004479097  
 CID004659568 CID004659569 CID005281104 CID005311297 CID005487301  
 CID011947681

(59)  $S_{59}$ : 241 drug compounds having side effect "Hepatitis"

CID000000444 CID000000450 CID000000807 CID000001065 CID000001134  
 CID000001690 CID000001775 CID000001972 CID000002022 CID000002082  
 CID000002099 CID000002118 CID000002156 CID000002160 CID000002162

|              |              |              |              |              |
|--------------|--------------|--------------|--------------|--------------|
| CID000002170 | CID000002171 | CID000002179 | CID000002187 | CID000002250 |
| CID000002269 | CID000002274 | CID000002311 | CID000002315 | CID000002478 |
| CID000002520 | CID000002541 | CID000002550 | CID000002554 | CID000002609 |
| CID000002617 | CID000002629 | CID000002631 | CID000002658 | CID000002662 |
| CID000002666 | CID000002675 | CID000002676 | CID000002678 | CID000002751 |
| CID000002764 | CID000002769 | CID000002771 | CID000002794 | CID000002800 |
| CID000002801 | CID000002803 | CID000002806 | CID000002818 | CID000002895 |
| CID000002913 | CID000002951 | CID000002983 | CID000002995 | CID000003015 |
| CID000003032 | CID000003040 | CID000003043 | CID000003059 | CID000003108 |
| CID000003117 | CID000003121 | CID000003143 | CID000003152 | CID000003157 |
| CID000003203 | CID000003222 | CID000003255 | CID000003279 | CID000003308 |
| CID000003333 | CID000003339 | CID000003342 | CID000003365 | CID000003372 |
| CID000003386 | CID000003394 | CID000003397 | CID000003403 | CID000003404 |
| CID000003419 | CID000003446 | CID000003449 | CID000003454 | CID000003475 |
| CID000003476 | CID000003488 | CID000003637 | CID000003672 | CID000003702 |
| CID000003706 | CID000003749 | CID000003763 | CID000003793 | CID000003825 |
| CID000003826 | CID000003827 | CID000003869 | CID000003878 | CID000003899 |
| CID000003937 | CID000003948 | CID000003961 | CID000003962 | CID000003964 |
| CID000004030 | CID000004044 | CID000004053 | CID000004054 | CID000004060 |
| CID000004075 | CID000004091 | CID000004112 | CID000004138 | CID000004170 |
| CID000004171 | CID000004173 | CID000004178 | CID000004200 | CID000004212 |
| CID000004259 | CID000004428 | CID000004449 | CID000004451 | CID000004463 |
| CID000004485 | CID000004493 | CID000004497 | CID000004509 | CID000004513 |
| CID000004539 | CID000004543 | CID000004547 | CID000004583 | CID000004585 |
| CID000004594 | CID000004599 | CID000004603 | CID000004614 | CID000004679 |
| CID000004691 | CID000004723 | CID000004740 | CID000004745 | CID000004819 |
| CID000004829 | CID000004834 | CID000004856 | CID000004889 | CID000004920 |
| CID000004932 | CID000005005 | CID000005029 | CID000005038 | CID000005039 |
| CID000005070 | CID000005073 | CID000005076 | CID000005090 | CID000005095 |
| CID000005155 | CID000005195 | CID000005203 | CID000005206 | CID000005215 |
| CID000005291 | CID000005344 | CID000005352 | CID000005372 | CID000005376 |
| CID000005379 | CID000005426 | CID000005472 | CID000005487 | CID000005504 |
| CID000005508 | CID000005514 | CID000005523 | CID000005525 | CID000005530 |
| CID000005538 | CID000005591 | CID000005625 | CID000005647 | CID000005650 |
| CID000005656 | CID000005717 | CID000005718 | CID000005726 | CID000005735 |
| CID000006691 | CID000010631 | CID000041317 | CID000041774 | CID000042113 |
| CID000054454 | CID000054688 | CID000059708 | CID000060164 | CID000060184 |
| CID000060198 | CID000060613 | CID000060787 | CID000060795 | CID000060953 |
| CID000062959 | CID000064147 | CID000065027 | CID000071158 | CID000071616 |
| CID000072938 | CID000074989 | CID000077999 | CID000083786 | CID000093860 |
| CID000104865 | CID000119607 | CID000124087 | CID000125889 | CID000147912 |
| CID000148192 | CID000150311 | CID000153941 | CID000213039 | CID000443871 |
| CID000657298 | CID001349907 | CID002761171 | CID003002190 | CID003062316 |
| CID003081884 | CID004659568 | CID005311297 | CID005353980 | CID005361912 |

CID005381226 CID005481350 CID005487301 CID005493381 CID006323497  
CID006398970

(60)  $S_{60}$  : 243 drug compounds having side effect "Sweating"

CID000000159 CID000000187 CID000000191 CID000000444 CID000000450  
CID000000581 CID000000807 CID000000838 CID000000888 CID000000937  
CID000000951 CID000001065 CID000001690 CID000001775 CID000001972  
CID000001978 CID000002083 CID000002099 CID000002131 CID000002140  
CID000002160 CID000002170 CID000002182 CID000002187 CID000002244  
CID000002249 CID000002250 CID000002269 CID000002284 CID000002311  
CID000002369 CID000002370 CID000002375 CID000002405 CID000002471  
CID000002476 CID000002487 CID000002520 CID000002541 CID000002551  
CID000002564 CID000002585 CID000002609 CID000002658 CID000002725  
CID000002764 CID000002771 CID000002781 CID000002801 CID000002803  
CID000002818 CID000002895 CID000002907 CID000002913 CID000002949  
CID000002951 CID000002978 CID000002995 CID000003003 CID000003007  
CID000003016 CID000003019 CID000003032 CID000003042 CID000003059  
CID000003066 CID000003075 CID000003080 CID000003100 CID000003121  
CID000003152 CID000003154 CID000003156 CID000003158 CID000003261  
CID000003308 CID000003339 CID000003340 CID000003345 CID000003372  
CID000003373 CID000003379 CID000003393 CID000003394 CID000003403  
CID000003404 CID000003440 CID000003446 CID000003454 CID000003461  
CID000003475 CID000003478 CID000003494 CID000003510 CID000003519  
CID000003640 CID000003648 CID000003661 CID000003675 CID000003696  
CID000003715 CID000003736 CID000003737 CID000003739 CID000003742  
CID000003746 CID000003750 CID000003759 CID000003779 CID000003793  
CID000003825 CID000003826 CID000003869 CID000003877 CID000003878  
CID000003883 CID000003902 CID000003911 CID000003937 CID000003961  
CID000004011 CID000004046 CID000004057 CID000004058 CID000004075  
CID000004095 CID000004112 CID000004158 CID000004171 CID000004173  
CID000004205 CID000004212 CID000004236 CID000004253 CID000004259  
CID000004411 CID000004425 CID000004436 CID000004440 CID000004449  
CID000004451 CID000004485 CID000004493 CID000004510 CID000004513  
CID000004543 CID000004583 CID000004585 CID000004609 CID000004635  
CID000004679 CID000004724 CID000004739 CID000004740 CID000004745  
CID000004748 CID000004812 CID000004819 CID000004828 CID000004885  
CID000004914 CID000004915 CID000004934 CID000004976 CID000005002  
CID000005029 CID000005035 CID000005040 CID000005073 CID000005076  
CID000005078 CID000005090 CID000005095 CID000005155 CID000005195  
CID000005210 CID000005212 CID000005253 CID000005358 CID000005372  
CID000005376 CID000005379 CID000005396 CID000005401 CID000005403  
CID000005408 CID000005426 CID000005466 CID000005478 CID000005479  
CID000005486 CID000005487 CID000005496 CID000005514 CID000005515  
CID000005516 CID000005523 CID000005525 CID000005533 CID000005538



|              |              |              |              |              |
|--------------|--------------|--------------|--------------|--------------|
| CID000005544 | CID000005584 | CID000005645 | CID000005719 | CID000005731 |
| CID000005734 | CID000005735 | CID000005978 | CID000012536 | CID000019090 |
| CID000027661 | CID000032800 | CID000060184 | CID000060198 | CID000060613 |
| CID000060714 | CID000060795 | CID000062819 | CID000062867 | CID000071158 |
| CID000071329 | CID000071616 | CID000072054 | CID000074989 | CID000077993 |
| CID000082146 | CID000083786 | CID000104741 | CID000104758 | CID000110634 |
| CID000110635 | CID000122316 | CID000125889 | CID000148192 | CID000150610 |
| CID000216326 | CID003081884 | CID005229711 | CID005281104 | CID005282044 |
| CID005362420 | CID005481350 | CID009571074 |              |              |

(61)  $S_{61}$ : 236 drug compounds having side effect "Influenza"

|              |              |              |              |              |
|--------------|--------------|--------------|--------------|--------------|
| CID000000085 | CID000000159 | CID000000214 | CID000000444 | CID000000450 |
| CID000000596 | CID000000598 | CID000000738 | CID000000937 | CID000000942 |
| CID000001134 | CID000001690 | CID000001775 | CID000001971 | CID000001972 |
| CID000002083 | CID000002088 | CID000002092 | CID000002118 | CID000002182 |
| CID000002187 | CID000002250 | CID000002267 | CID000002269 | CID000002284 |
| CID000002311 | CID000002369 | CID000002375 | CID000002435 | CID000002462 |
| CID000002476 | CID000002477 | CID000002512 | CID000002520 | CID000002541 |
| CID000002585 | CID000002609 | CID000002662 | CID000002676 | CID000002713 |
| CID000002726 | CID000002771 | CID000002786 | CID000002802 | CID000002806 |
| CID000002909 | CID000002955 | CID000002958 | CID000003015 | CID000003032 |
| CID000003066 | CID000003075 | CID000003121 | CID000003148 | CID000003152 |
| CID000003154 | CID000003157 | CID000003161 | CID000003203 | CID000003285 |
| CID000003325 | CID000003333 | CID000003339 | CID000003345 | CID000003348 |
| CID000003379 | CID000003381 | CID000003386 | CID000003394 | CID000003403 |
| CID000003404 | CID000003410 | CID000003414 | CID000003417 | CID000003419 |
| CID000003446 | CID000003461 | CID000003702 | CID000003746 | CID000003749 |
| CID000003827 | CID000003878 | CID000003883 | CID000003890 | CID000003899 |
| CID000003902 | CID000003911 | CID000003937 | CID000003948 | CID000003961 |
| CID000003962 | CID000004054 | CID000004086 | CID000004091 | CID000004158 |
| CID000004173 | CID000004200 | CID000004201 | CID000004205 | CID000004236 |
| CID000004253 | CID000004428 | CID000004449 | CID000004493 | CID000004542 |
| CID000004583 | CID000004585 | CID000004594 | CID000004599 | CID000004634 |
| CID000004635 | CID000004666 | CID000004679 | CID000004691 | CID000004739 |
| CID000004740 | CID000004745 | CID000004819 | CID000004856 | CID000004885 |
| CID000004889 | CID000004917 | CID000004920 | CID000004932 | CID000005002 |
| CID000005035 | CID000005038 | CID000005040 | CID000005064 | CID000005070 |
| CID000005073 | CID000005076 | CID000005077 | CID000005090 | CID000005095 |
| CID000005152 | CID000005155 | CID000005195 | CID000005210 | CID000005212 |
| CID000005245 | CID000005253 | CID000005291 | CID000005358 | CID000005372 |
| CID000005376 | CID000005394 | CID000005401 | CID000005402 | CID000005426 |
| CID000005466 | CID000005487 | CID000005512 | CID000005514 | CID000005523 |
| CID000005544 | CID000005596 | CID000005625 | CID000005636 | CID000005645 |
| CID000005647 | CID000005656 | CID000005718 | CID000005726 | CID000005731 |

|              |              |              |              |              |
|--------------|--------------|--------------|--------------|--------------|
| CID000005732 | CID000005734 | CID000005735 | CID000010631 | CID000027661 |
| CID000032797 | CID000039042 | CID000040976 | CID000041317 | CID000051634 |
| CID000054688 | CID000054786 | CID000057469 | CID000057537 | CID000059708 |
| CID000060198 | CID000060613 | CID000060787 | CID000060795 | CID000060852 |
| CID000060865 | CID000060953 | CID000062819 | CID000062924 | CID000064147 |
| CID000065027 | CID000065999 | CID000068740 | CID000071158 | CID000071329 |
| CID000071616 | CID000072054 | CID000074989 | CID000077993 | CID000077999 |
| CID000082146 | CID000104741 | CID000104758 | CID000104865 | CID000110634 |
| CID000119607 | CID000122316 | CID000123606 | CID000123620 | CID000125889 |
| CID000130881 | CID000147912 | CID000148211 | CID000150310 | CID000150311 |
| CID000160051 | CID000170361 | CID000197712 | CID000216239 | CID000216326 |
| CID000443871 | CID000444013 | CID000444033 | CID003081884 | CID004659569 |
| CID005281007 | CID005281104 | CID005282226 | CID005311181 | CID005311297 |
| CID005361912 | CID005362070 | CID005362420 | CID005493381 | CID005493444 |
| CID006447131 |              |              |              |              |

(62)  $S_{62}$  : 241 drug compounds having side effect "Seizures"

|              |              |              |              |              |
|--------------|--------------|--------------|--------------|--------------|
| CID000000085 | CID000000143 | CID000000159 | CID000000191 | CID000000214 |
| CID000000401 | CID000000450 | CID000000596 | CID000000727 | CID000000767 |
| CID000000853 | CID000001065 | CID000001690 | CID000001972 | CID000002022 |
| CID000002118 | CID000002130 | CID000002141 | CID000002153 | CID000002160 |
| CID000002170 | CID000002179 | CID000002182 | CID000002269 | CID000002274 |
| CID000002284 | CID000002349 | CID000002370 | CID000002441 | CID000002443 |
| CID000002474 | CID000002477 | CID000002478 | CID000002487 | CID000002520 |
| CID000002576 | CID000002578 | CID000002610 | CID000002617 | CID000002622 |
| CID000002631 | CID000002637 | CID000002646 | CID000002650 | CID000002654 |
| CID000002655 | CID000002656 | CID000002658 | CID000002666 | CID000002675 |
| CID000002678 | CID000002708 | CID000002719 | CID000002726 | CID000002764 |
| CID000002769 | CID000002771 | CID000002800 | CID000002801 | CID000002895 |
| CID000002905 | CID000002951 | CID000002978 | CID000002995 | CID000003007 |
| CID000003040 | CID000003108 | CID000003143 | CID000003152 | CID000003158 |
| CID000003226 | CID000003255 | CID000003261 | CID000003310 | CID000003325 |
| CID000003342 | CID000003345 | CID000003365 | CID000003367 | CID000003372 |
| CID000003373 | CID000003385 | CID000003386 | CID000003394 | CID000003404 |
| CID000003405 | CID000003406 | CID000003414 | CID000003454 | CID000003494 |
| CID000003559 | CID000003648 | CID000003657 | CID000003672 | CID000003676 |
| CID000003685 | CID000003690 | CID000003696 | CID000003715 | CID000003736 |
| CID000003741 | CID000003779 | CID000003821 | CID000003883 | CID000003911 |
| CID000003929 | CID000003956 | CID000003958 | CID000003964 | CID000004011 |
| CID000004046 | CID000004053 | CID000004060 | CID000004095 | CID000004107 |
| CID000004112 | CID000004140 | CID000004158 | CID000004159 | CID000004163 |
| CID000004168 | CID000004173 | CID000004178 | CID000004192 | CID000004205 |
| CID000004212 | CID000004253 | CID000004259 | CID000004419 | CID000004425 |
| CID000004449 | CID000004451 | CID000004536 | CID000004583 | CID000004585 |

|              |              |              |              |              |
|--------------|--------------|--------------|--------------|--------------|
| CID000004595 | CID000004603 | CID000004609 | CID000004635 | CID000004666 |
| CID000004679 | CID000004723 | CID000004740 | CID000004745 | CID000004748 |
| CID000004834 | CID000004885 | CID000004891 | CID000004920 | CID000004927 |
| CID000004932 | CID000004943 | CID000004976 | CID000004991 | CID000005002 |
| CID000005029 | CID000005064 | CID000005070 | CID000005073 | CID000005076 |
| CID000005078 | CID000005195 | CID000005206 | CID000005210 | CID000005212 |
| CID000005358 | CID000005372 | CID000005379 | CID000005394 | CID000005401 |
| CID000005408 | CID000005426 | CID000005454 | CID000005487 | CID000005523 |
| CID000005533 | CID000005538 | CID000005582 | CID000005584 | CID000005645 |
| CID000005647 | CID000005656 | CID000005718 | CID000005721 | CID000005726 |
| CID000005735 | CID000005771 | CID000005978 | CID000006058 | CID000009034 |
| CID000009433 | CID000010631 | CID000014888 | CID000019090 | CID000028112 |
| CID000036339 | CID000039860 | CID000040159 | CID000047319 | CID000050614 |
| CID000054547 | CID000054688 | CID000059768 | CID000060612 | CID000060613 |
| CID000060714 | CID000060754 | CID000060787 | CID000060795 | CID000062867 |
| CID000064147 | CID000071158 | CID000071273 | CID000071616 | CID000077992 |
| CID000077993 | CID000093860 | CID000096312 | CID000110634 | CID000115237 |
| CID000122316 | CID000123606 | CID000124087 | CID000125017 | CID000145068 |
| CID000148192 | CID000150610 | CID000151165 | CID000166548 | CID000170361 |
| CID000444013 | CID003062316 | CID003081884 | CID005281007 | CID005311297 |
| CID005329102 | CID005361912 | CID005493444 | CID006398970 | CID006435110 |
| CID009571074 |              |              |              |              |

(63)  $S_{63}$ : 225 drug compounds having side effect "Sinusitis"

|              |              |              |              |              |
|--------------|--------------|--------------|--------------|--------------|
| CID000000085 | CID000000159 | CID000000214 | CID000000444 | CID000000450 |
| CID000000942 | CID000001690 | CID000001775 | CID000001935 | CID000001972 |
| CID000002083 | CID000002092 | CID000002182 | CID000002187 | CID000002250 |
| CID000002267 | CID000002308 | CID000002311 | CID000002369 | CID000002375 |
| CID000002405 | CID000002435 | CID000002462 | CID000002478 | CID000002487 |
| CID000002520 | CID000002541 | CID000002554 | CID000002583 | CID000002585 |
| CID000002609 | CID000002662 | CID000002676 | CID000002678 | CID000002713 |
| CID000002751 | CID000002769 | CID000002771 | CID000002786 | CID000002801 |
| CID000002802 | CID000002806 | CID000002909 | CID000002955 | CID000002958 |
| CID000002978 | CID000003016 | CID000003032 | CID000003066 | CID000003075 |
| CID000003121 | CID000003154 | CID000003157 | CID000003219 | CID000003241 |
| CID000003261 | CID000003285 | CID000003308 | CID000003325 | CID000003333 |
| CID000003339 | CID000003345 | CID000003348 | CID000003367 | CID000003379 |
| CID000003381 | CID000003385 | CID000003386 | CID000003394 | CID000003403 |
| CID000003404 | CID000003410 | CID000003414 | CID000003419 | CID000003446 |
| CID000003475 | CID000003510 | CID000003702 | CID000003724 | CID000003746 |
| CID000003793 | CID000003878 | CID000003883 | CID000003899 | CID000003911 |
| CID000003937 | CID000003961 | CID000003962 | CID000004158 | CID000004173 |
| CID000004196 | CID000004201 | CID000004205 | CID000004212 | CID000004236 |
| CID000004428 | CID000004440 | CID000004449 | CID000004451 | CID000004473 |

|              |              |              |              |              |
|--------------|--------------|--------------|--------------|--------------|
| CID000004485 | CID000004513 | CID000004542 | CID000004547 | CID000004594 |
| CID000004603 | CID000004614 | CID000004634 | CID000004635 | CID000004679 |
| CID000004691 | CID000004739 | CID000004745 | CID000004819 | CID000004829 |
| CID000004885 | CID000004889 | CID000004920 | CID000005035 | CID000005038 |
| CID000005040 | CID000005064 | CID000005070 | CID000005073 | CID000005076 |
| CID000005077 | CID000005090 | CID000005095 | CID000005152 | CID000005155 |
| CID000005195 | CID000005203 | CID000005210 | CID000005212 | CID000005245 |
| CID000005291 | CID000005358 | CID000005372 | CID000005376 | CID000005394 |
| CID000005401 | CID000005426 | CID000005466 | CID000005478 | CID000005487 |
| CID000005496 | CID000005512 | CID000005514 | CID000005523 | CID000005538 |
| CID000005544 | CID000005625 | CID000005636 | CID000005645 | CID000005650 |
| CID000005656 | CID000005665 | CID000005718 | CID000005721 | CID000005726 |
| CID000005731 | CID000005732 | CID000010631 | CID000014888 | CID000027661 |
| CID000034312 | CID000040976 | CID000041317 | CID000047725 | CID000050294 |
| CID000054454 | CID000054547 | CID000054786 | CID000057469 | CID000057537 |
| CID000059708 | CID000060184 | CID000060198 | CID000060613 | CID000060787 |
| CID000060795 | CID000060865 | CID000060871 | CID000060877 | CID000062819 |
| CID000062924 | CID000062959 | CID000064147 | CID000065999 | CID000071616 |
| CID000072054 | CID000074989 | CID000077992 | CID000077993 | CID000077999 |
| CID000093860 | CID000096312 | CID000104865 | CID000110634 | CID000119607 |
| CID000123606 | CID000123620 | CID000125889 | CID000130881 | CID000147912 |
| CID000148211 | CID000150311 | CID000158440 | CID000160051 | CID000170361 |
| CID000197712 | CID000216326 | CID000444013 | CID000444033 | CID003081884 |
| CID004659568 | CID004659569 | CID005281104 | CID005282226 | CID005311027 |
| CID005311297 | CID005481350 | CID005487301 | CID006447131 | CID009571074 |

(64)  $S_{64}$  : 232 drug compounds having side effect "Hallucinations"

|              |              |              |              |              |
|--------------|--------------|--------------|--------------|--------------|
| CID000000206 | CID000000444 | CID000000564 | CID000000767 | CID000000807 |
| CID000001935 | CID000001972 | CID000001978 | CID000002022 | CID000002118 |
| CID000002130 | CID000002156 | CID000002160 | CID000002170 | CID000002215 |
| CID000002249 | CID000002284 | CID000002344 | CID000002349 | CID000002369 |
| CID000002405 | CID000002441 | CID000002476 | CID000002477 | CID000002478 |
| CID000002487 | CID000002512 | CID000002554 | CID000002578 | CID000002609 |
| CID000002622 | CID000002662 | CID000002666 | CID000002678 | CID000002708 |
| CID000002756 | CID000002764 | CID000002769 | CID000002771 | CID000002801 |
| CID000002802 | CID000002803 | CID000002806 | CID000002818 | CID000002895 |
| CID000002905 | CID000002913 | CID000002958 | CID000002978 | CID000002995 |
| CID000003007 | CID000003016 | CID000003032 | CID000003059 | CID000003062 |
| CID000003075 | CID000003121 | CID000003125 | CID000003152 | CID000003154 |
| CID000003156 | CID000003158 | CID000003203 | CID000003255 | CID000003261 |
| CID000003279 | CID000003305 | CID000003308 | CID000003324 | CID000003325 |
| CID000003345 | CID000003355 | CID000003366 | CID000003373 | CID000003386 |
| CID000003393 | CID000003394 | CID000003404 | CID000003414 | CID000003446 |
| CID000003449 | CID000003454 | CID000003467 | CID000003559 | CID000003648 |

|              |              |              |              |              |
|--------------|--------------|--------------|--------------|--------------|
| CID000003657 | CID000003658 | CID000003661 | CID000003672 | CID000003690 |
| CID000003696 | CID000003741 | CID000003759 | CID000003763 | CID000003821 |
| CID000003825 | CID000003826 | CID000003878 | CID000003883 | CID000003948 |
| CID000003958 | CID000004011 | CID000004044 | CID000004046 | CID000004054 |
| CID000004058 | CID000004095 | CID000004140 | CID000004158 | CID000004168 |
| CID000004171 | CID000004173 | CID000004178 | CID000004192 | CID000004205 |
| CID000004236 | CID000004253 | CID000004259 | CID000004411 | CID000004419 |
| CID000004425 | CID000004428 | CID000004440 | CID000004449 | CID000004506 |
| CID000004539 | CID000004543 | CID000004583 | CID000004585 | CID000004594 |
| CID000004601 | CID000004603 | CID000004614 | CID000004616 | CID000004635 |
| CID000004679 | CID000004691 | CID000004723 | CID000004736 | CID000004737 |
| CID000004739 | CID000004745 | CID000004819 | CID000004828 | CID000004856 |
| CID000004893 | CID000004913 | CID000004915 | CID000004927 | CID000004943 |
| CID000004946 | CID000004976 | CID000004991 | CID000005002 | CID000005039 |
| CID000005040 | CID000005064 | CID000005070 | CID000005071 | CID000005073 |
| CID000005076 | CID000005077 | CID000005090 | CID000005095 | CID000005193 |
| CID000005195 | CID000005203 | CID000005215 | CID000005344 | CID000005358 |
| CID000005372 | CID000005379 | CID000005391 | CID000005394 | CID000005466 |
| CID000005478 | CID000005512 | CID000005514 | CID000005523 | CID000005525 |
| CID000005533 | CID000005538 | CID000005556 | CID000005572 | CID000005584 |
| CID000005596 | CID000005625 | CID000005647 | CID000005656 | CID000005665 |
| CID000005718 | CID000005719 | CID000005721 | CID000005731 | CID000005732 |
| CID000005735 | CID000005978 | CID000006058 | CID000006476 | CID000010100 |
| CID000027686 | CID000028112 | CID000039860 | CID000054547 | CID000054688 |
| CID000057537 | CID000059708 | CID000060612 | CID000060613 | CID000060787 |
| CID000060795 | CID000062959 | CID000064147 | CID000068740 | CID000071158 |
| CID000071273 | CID000071616 | CID000072054 | CID000077993 | CID000122316 |
| CID000125889 | CID000148192 | CID000150610 | CID000151165 | CID000158440 |
| CID000170361 | CID000444013 | CID003081884 | CID004659568 | CID004659569 |
| CID005311297 | CID005353980 |              |              |              |

(65)  $S_{65}$ : 225 drug compounds having side effect “Bradycardia”

|              |              |              |              |              |
|--------------|--------------|--------------|--------------|--------------|
| CID000000158 | CID000000159 | CID000000187 | CID000000191 | CID000000214 |
| CID000000564 | CID000000681 | CID000000767 | CID000000951 | CID000001065 |
| CID000001690 | CID000001775 | CID000001935 | CID000001972 | CID000001978 |
| CID000002141 | CID000002156 | CID000002162 | CID000002179 | CID000002216 |
| CID000002232 | CID000002249 | CID000002284 | CID000002369 | CID000002375 |
| CID000002381 | CID000002405 | CID000002431 | CID000002435 | CID000002443 |
| CID000002474 | CID000002476 | CID000002477 | CID000002478 | CID000002554 |
| CID000002583 | CID000002585 | CID000002751 | CID000002756 | CID000002764 |
| CID000002771 | CID000002801 | CID000002803 | CID000002818 | CID000002995 |
| CID000003003 | CID000003016 | CID000003019 | CID000003032 | CID000003108 |
| CID000003114 | CID000003121 | CID000003148 | CID000003152 | CID000003154 |
| CID000003157 | CID000003222 | CID000003251 | CID000003325 | CID000003333 |

|              |              |              |              |              |
|--------------|--------------|--------------|--------------|--------------|
| CID000003340 | CID000003345 | CID000003355 | CID000003373 | CID000003386 |
| CID000003404 | CID000003406 | CID000003419 | CID000003446 | CID000003449 |
| CID000003510 | CID000003518 | CID000003519 | CID000003639 | CID000003640 |
| CID000003648 | CID000003672 | CID000003676 | CID000003715 | CID000003724 |
| CID000003734 | CID000003736 | CID000003741 | CID000003750 | CID000003821 |
| CID000003826 | CID000003869 | CID000003883 | CID000003911 | CID000003914 |
| CID000003937 | CID000003948 | CID000003958 | CID000004046 | CID000004054 |
| CID000004058 | CID000004062 | CID000004095 | CID000004107 | CID000004138 |
| CID000004140 | CID000004158 | CID000004168 | CID000004171 | CID000004178 |
| CID000004192 | CID000004205 | CID000004236 | CID000004253 | CID000004259 |
| CID000004411 | CID000004419 | CID000004440 | CID000004485 | CID000004497 |
| CID000004583 | CID000004585 | CID000004594 | CID000004595 | CID000004691 |
| CID000004724 | CID000004737 | CID000004739 | CID000004745 | CID000004748 |
| CID000004819 | CID000004828 | CID000004885 | CID000004891 | CID000004893 |
| CID000004894 | CID000004913 | CID000004914 | CID000004927 | CID000004932 |
| CID000004943 | CID000004991 | CID000005002 | CID000005029 | CID000005039 |
| CID000005052 | CID000005064 | CID000005070 | CID000005073 | CID000005077 |
| CID000005078 | CID000005090 | CID000005095 | CID000005193 | CID000005203 |
| CID000005206 | CID000005210 | CID000005253 | CID000005314 | CID000005358 |
| CID000005372 | CID000005379 | CID000005426 | CID000005478 | CID000005486 |
| CID000005487 | CID000005514 | CID000005523 | CID000005525 | CID000005533 |
| CID000005544 | CID000005625 | CID000005656 | CID000005731 | CID000005734 |
| CID000005771 | CID000005775 | CID000008612 | CID000010631 | CID000027661 |
| CID000028112 | CID000031477 | CID000034312 | CID000036339 | CID000041693 |
| CID000042113 | CID000047319 | CID000047320 | CID000051263 | CID000054786 |
| CID000056959 | CID000059768 | CID000060184 | CID000060612 | CID000060714 |
| CID000060753 | CID000060795 | CID000060953 | CID000062959 | CID000065999 |
| CID000068740 | CID000071273 | CID000071301 | CID000071329 | CID000071616 |
| CID000077992 | CID000077993 | CID000083786 | CID000093860 | CID000104865 |
| CID000115237 | CID000119607 | CID000125889 | CID000147912 | CID000148211 |
| CID000150610 | CID000151165 | CID000158440 | CID000170361 | CID000213039 |
| CID000216326 | CID000477468 | CID003002190 | CID003081884 | CID004659568 |
| CID004659569 | CID005282044 | CID005282226 | CID005329102 | CID011947681 |

(66) S<sub>66</sub> : 220 drug compounds having side effect "Hematuria"

|              |              |              |              |              |
|--------------|--------------|--------------|--------------|--------------|
| CID000000159 | CID000000175 | CID000000214 | CID000000450 | CID000000598 |
| CID000000772 | CID000000807 | CID000001690 | CID000001935 | CID000001972 |
| CID000001986 | CID000002022 | CID000002083 | CID000002140 | CID000002179 |
| CID000002182 | CID000002232 | CID000002250 | CID000002267 | CID000002284 |
| CID000002349 | CID000002375 | CID000002462 | CID000002478 | CID000002541 |
| CID000002554 | CID000002585 | CID000002654 | CID000002656 | CID000002662 |
| CID000002678 | CID000002720 | CID000002764 | CID000002771 | CID000002801 |
| CID000002806 | CID000002907 | CID000002909 | CID000002949 | CID000002951 |
| CID000003015 | CID000003032 | CID000003040 | CID000003059 | CID000003125 |

|              |              |              |              |              |
|--------------|--------------|--------------|--------------|--------------|
| CID000003148 | CID000003152 | CID000003157 | CID000003261 | CID000003278 |
| CID000003291 | CID000003308 | CID000003325 | CID000003342 | CID000003345 |
| CID000003355 | CID000003365 | CID000003367 | CID000003386 | CID000003394 |
| CID000003397 | CID000003404 | CID000003410 | CID000003414 | CID000003417 |
| CID000003446 | CID000003449 | CID000003454 | CID000003461 | CID000003648 |
| CID000003672 | CID000003690 | CID000003706 | CID000003715 | CID000003724 |
| CID000003734 | CID000003736 | CID000003741 | CID000003793 | CID000003825 |
| CID000003826 | CID000003878 | CID000003883 | CID000003899 | CID000003911 |
| CID000003948 | CID000004044 | CID000004054 | CID000004075 | CID000004100 |
| CID000004101 | CID000004112 | CID000004140 | CID000004205 | CID000004211 |
| CID000004212 | CID000004236 | CID000004259 | CID000004409 | CID000004449 |
| CID000004485 | CID000004493 | CID000004539 | CID000004542 | CID000004583 |
| CID000004585 | CID000004594 | CID000004607 | CID000004609 | CID000004614 |
| CID000004634 | CID000004635 | CID000004679 | CID000004691 | CID000004727 |
| CID000004745 | CID000004819 | CID000004856 | CID000004865 | CID000004885 |
| CID000004911 | CID000004915 | CID000004932 | CID000004993 | CID000005005 |
| CID000005029 | CID000005040 | CID000005070 | CID000005073 | CID000005076 |
| CID000005077 | CID000005095 | CID000005155 | CID000005195 | CID000005203 |
| CID000005210 | CID000005212 | CID000005291 | CID000005344 | CID000005352 |
| CID000005358 | CID000005372 | CID000005379 | CID000005408 | CID000005426 |
| CID000005430 | CID000005466 | CID000005472 | CID000005486 | CID000005487 |
| CID000005504 | CID000005508 | CID000005514 | CID000005523 | CID000005533 |
| CID000005538 | CID000005596 | CID000005625 | CID000005645 | CID000005647 |
| CID000005656 | CID000005719 | CID000005726 | CID000005731 | CID000005734 |
| CID000005735 | CID000006049 | CID000006476 | CID000027661 | CID000034312 |
| CID000041317 | CID000041744 | CID000054547 | CID000054688 | CID000054786 |
| CID000056959 | CID000060184 | CID000060613 | CID000060795 | CID000060865 |
| CID000060871 | CID000060877 | CID000060953 | CID000064147 | CID000065999 |
| CID000068740 | CID000071158 | CID000071273 | CID000071616 | CID000072938 |
| CID000082146 | CID000083786 | CID000093860 | CID000104865 | CID000110634 |
| CID000119182 | CID000119607 | CID000122316 | CID000123631 | CID000125889 |
| CID000130881 | CID000145068 | CID000147912 | CID000148192 | CID000150610 |
| CID000153941 | CID000158440 | CID000213039 | CID000216239 | CID000216326 |
| CID003081884 | CID004183806 | CID004659568 | CID004659569 | CID005353980 |
| CID005381226 | CID005481350 | CID006323497 | CID006436173 | CID006918453 |

(67)  $S_{67}$  : 221 drug compounds having side effect "Conjunctivitis"

|              |              |              |              |              |
|--------------|--------------|--------------|--------------|--------------|
| CID000000444 | CID000000450 | CID000000596 | CID000000598 | CID000001690 |
| CID000001775 | CID000001935 | CID000001971 | CID000001972 | CID000001978 |
| CID000002083 | CID000002140 | CID000002162 | CID000002182 | CID000002216 |
| CID000002269 | CID000002369 | CID000002375 | CID000002405 | CID000002431 |
| CID000002435 | CID000002462 | CID000002476 | CID000002477 | CID000002524 |
| CID000002541 | CID000002554 | CID000002609 | CID000002662 | CID000002678 |
| CID000002751 | CID000002771 | CID000002801 | CID000002806 | CID000002905 |

|              |              |              |              |              |
|--------------|--------------|--------------|--------------|--------------|
| CID000002909 | CID000002958 | CID000002978 | CID000003032 | CID000003066 |
| CID000003075 | CID000003080 | CID000003105 | CID000003121 | CID000003143 |
| CID000003151 | CID000003152 | CID000003154 | CID000003157 | CID000003222 |
| CID000003285 | CID000003308 | CID000003339 | CID000003345 | CID000003379 |
| CID000003384 | CID000003385 | CID000003386 | CID000003394 | CID000003403 |
| CID000003404 | CID000003414 | CID000003446 | CID000003475 | CID000003478 |
| CID000003519 | CID000003637 | CID000003661 | CID000003672 | CID000003687 |
| CID000003702 | CID000003724 | CID000003734 | CID000003736 | CID000003741 |
| CID000003746 | CID000003749 | CID000003825 | CID000003878 | CID000003883 |
| CID000003890 | CID000003899 | CID000003911 | CID000003948 | CID000003961 |
| CID000004004 | CID000004036 | CID000004044 | CID000004054 | CID000004060 |
| CID000004075 | CID000004107 | CID000004112 | CID000004158 | CID000004171 |
| CID000004173 | CID000004205 | CID000004212 | CID000004236 | CID000004253 |
| CID000004259 | CID000004428 | CID000004449 | CID000004463 | CID000004485 |
| CID000004539 | CID000004585 | CID000004594 | CID000004603 | CID000004609 |
| CID000004614 | CID000004634 | CID000004666 | CID000004691 | CID000004739 |
| CID000004740 | CID000004745 | CID000004819 | CID000004856 | CID000004885 |
| CID000004893 | CID000004920 | CID000004946 | CID000005002 | CID000005029 |
| CID000005035 | CID000005038 | CID000005040 | CID000005064 | CID000005073 |
| CID000005076 | CID000005077 | CID000005090 | CID000005095 | CID000005152 |
| CID000005155 | CID000005195 | CID000005203 | CID000005206 | CID000005212 |
| CID000005291 | CID000005352 | CID000005358 | CID000005372 | CID000005379 |
| CID000005401 | CID000005426 | CID000005453 | CID000005466 | CID000005478 |
| CID000005487 | CID000005514 | CID000005523 | CID000005538 | CID000005625 |
| CID000005636 | CID000005645 | CID000005656 | CID000005718 | CID000005719 |
| CID000005731 | CID000005732 | CID000005734 | CID000005735 | CID000005761 |
| CID000027991 | CID000031477 | CID000041317 | CID000042113 | CID000054688 |
| CID000057469 | CID000059708 | CID000060164 | CID000060184 | CID000060613 |
| CID000060787 | CID000060795 | CID000060953 | CID000062819 | CID000062924 |
| CID000062959 | CID000065999 | CID000068740 | CID000068844 | CID000071616 |
| CID000077992 | CID000077993 | CID000082146 | CID000083786 | CID000104758 |
| CID000104865 | CID000110634 | CID000110635 | CID000119607 | CID000122316 |
| CID000123606 | CID000123620 | CID000123631 | CID000125889 | CID000147912 |
| CID000151165 | CID000158440 | CID000170361 | CID000176870 | CID000216326 |
| CID000444013 | CID000444033 | CID003062316 | CID003081884 | CID004183806 |
| CID004659568 | CID005281104 | CID005282226 | CID005311027 | CID005311297 |
| CID005362420 | CID005381226 | CID006398970 | CID006435110 | CID006447131 |
| CID006918453 |              |              |              |              |

(68)  $S_{68}$  : 228 drug compounds having side effect "Agranulocytosis"

|              |              |              |              |              |
|--------------|--------------|--------------|--------------|--------------|
| CID000000298 | CID000000564 | CID000000598 | CID000001065 | CID000001690 |
| CID000001775 | CID000001972 | CID000001978 | CID000001986 | CID000002082 |
| CID000002130 | CID000002145 | CID000002156 | CID000002160 | CID000002170 |
| CID000002171 | CID000002173 | CID000002179 | CID000002249 | CID000002265 |



|              |              |              |              |              |
|--------------|--------------|--------------|--------------|--------------|
| CID000002315 | CID000002369 | CID000002405 | CID000002478 | CID000002541 |
| CID000002554 | CID000002564 | CID000002609 | CID000002610 | CID000002617 |
| CID000002622 | CID000002631 | CID000002637 | CID000002646 | CID000002650 |
| CID000002654 | CID000002655 | CID000002656 | CID000002658 | CID000002662 |
| CID000002666 | CID000002675 | CID000002712 | CID000002719 | CID000002720 |
| CID000002725 | CID000002726 | CID000002727 | CID000002732 | CID000002751 |
| CID000002756 | CID000002764 | CID000002769 | CID000002771 | CID000002781 |
| CID000002786 | CID000002806 | CID000002895 | CID000002913 | CID000002995 |
| CID000003032 | CID000003040 | CID000003059 | CID000003100 | CID000003114 |
| CID000003121 | CID000003143 | CID000003154 | CID000003158 | CID000003261 |
| CID000003278 | CID000003291 | CID000003305 | CID000003308 | CID000003325 |
| CID000003342 | CID000003355 | CID000003365 | CID000003366 | CID000003372 |
| CID000003385 | CID000003393 | CID000003394 | CID000003404 | CID000003414 |
| CID000003440 | CID000003454 | CID000003467 | CID000003475 | CID000003476 |
| CID000003478 | CID000003488 | CID000003512 | CID000003559 | CID000003637 |
| CID000003639 | CID000003647 | CID000003648 | CID000003652 | CID000003672 |
| CID000003696 | CID000003702 | CID000003715 | CID000003767 | CID000003825 |
| CID000003826 | CID000003869 | CID000003878 | CID000003883 | CID000003899 |
| CID000003928 | CID000003948 | CID000003956 | CID000003958 | CID000003961 |
| CID000003964 | CID000004011 | CID000004030 | CID000004033 | CID000004036 |
| CID000004044 | CID000004060 | CID000004064 | CID000004075 | CID000004078 |
| CID000004100 | CID000004112 | CID000004121 | CID000004138 | CID000004168 |
| CID000004170 | CID000004171 | CID000004173 | CID000004178 | CID000004200 |
| CID000004205 | CID000004212 | CID000004236 | CID000004409 | CID000004411 |
| CID000004463 | CID000004506 | CID000004509 | CID000004539 | CID000004543 |
| CID000004583 | CID000004594 | CID000004607 | CID000004609 | CID000004614 |
| CID000004616 | CID000004691 | CID000004724 | CID000004727 | CID000004739 |
| CID000004748 | CID000004828 | CID000004834 | CID000004856 | CID000004870 |
| CID000004909 | CID000004917 | CID000004927 | CID000004932 | CID000004946 |
| CID000004976 | CID000005002 | CID000005029 | CID000005039 | CID000005070 |
| CID000005073 | CID000005090 | CID000005095 | CID000005203 | CID000005215 |
| CID000005253 | CID000005267 | CID000005320 | CID000005342 | CID000005344 |
| CID000005352 | CID000005402 | CID000005426 | CID000005452 | CID000005454 |
| CID000005478 | CID000005487 | CID000005496 | CID000005503 | CID000005505 |
| CID000005508 | CID000005514 | CID000005530 | CID000005538 | CID000005566 |
| CID000005584 | CID000005651 | CID000005656 | CID000005672 | CID000005717 |
| CID000005726 | CID000007029 | CID000013342 | CID000016362 | CID000030623 |
| CID000034312 | CID000050614 | CID000051634 | CID000054547 | CID000060953 |
| CID000062867 | CID000062959 | CID000068740 | CID000071616 | CID000072938 |
| CID000083786 | CID000130881 | CID000147912 | CID000216326 | CID000657298 |
| CID001349907 | CID005353980 | CID005381226 | CID005493381 | CID006398970 |
| CID006918453 | CID009571074 | CID011954225 |              |              |

(69)  $S_{69}$  : 227 drug compounds having side effect "Weakness"

|              |              |              |              |              |
|--------------|--------------|--------------|--------------|--------------|
| CID000000158 | CID000000191 | CID000000206 | CID000000401 | CID000000596 |
| CID000000838 | CID000000853 | CID000001065 | CID000001546 | CID000001690 |
| CID000001935 | CID000001978 | CID000002083 | CID000002118 | CID000002130 |
| CID000002140 | CID000002156 | CID000002160 | CID000002170 | CID000002215 |
| CID000002274 | CID000002284 | CID000002315 | CID000002405 | CID000002471 |
| CID000002474 | CID000002476 | CID000002477 | CID000002478 | CID000002487 |
| CID000002524 | CID000002576 | CID000002585 | CID000002610 | CID000002676 |
| CID000002708 | CID000002719 | CID000002720 | CID000002732 | CID000002762 |
| CID000002764 | CID000002800 | CID000002801 | CID000002802 | CID000002803 |
| CID000002818 | CID000002895 | CID000002907 | CID000002909 | CID000002949 |
| CID000002951 | CID000002995 | CID000003003 | CID000003015 | CID000003019 |
| CID000003042 | CID000003062 | CID000003080 | CID000003121 | CID000003143 |
| CID000003154 | CID000003157 | CID000003158 | CID000003203 | CID000003249 |
| CID000003251 | CID000003285 | CID000003310 | CID000003339 | CID000003355 |
| CID000003366 | CID000003367 | CID000003379 | CID000003393 | CID000003403 |
| CID000003419 | CID000003440 | CID000003446 | CID000003461 | CID000003475 |
| CID000003494 | CID000003518 | CID000003519 | CID000003639 | CID000003647 |
| CID000003648 | CID000003652 | CID000003661 | CID000003675 | CID000003676 |
| CID000003696 | CID000003702 | CID000003736 | CID000003737 | CID000003742 |
| CID000003767 | CID000003779 | CID000003784 | CID000003877 | CID000003902 |
| CID000003911 | CID000003937 | CID000003958 | CID000003961 | CID000003962 |
| CID000003964 | CID000004011 | CID000004032 | CID000004033 | CID000004057 |
| CID000004058 | CID000004062 | CID000004064 | CID000004078 | CID000004086 |
| CID000004095 | CID000004112 | CID000004121 | CID000004138 | CID000004163 |
| CID000004170 | CID000004171 | CID000004173 | CID000004178 | CID000004192 |
| CID000004212 | CID000004253 | CID000004419 | CID000004421 | CID000004425 |
| CID000004436 | CID000004485 | CID000004506 | CID000004510 | CID000004543 |
| CID000004583 | CID000004595 | CID000004601 | CID000004614 | CID000004635 |
| CID000004666 | CID000004691 | CID000004736 | CID000004740 | CID000004828 |
| CID000004845 | CID000004870 | CID000004873 | CID000004889 | CID000004893 |
| CID000004913 | CID000004915 | CID000004932 | CID000004934 | CID000004943 |
| CID000004946 | CID000004976 | CID000004991 | CID000005077 | CID000005078 |
| CID000005095 | CID000005155 | CID000005195 | CID000005253 | CID000005291 |
| CID000005344 | CID000005358 | CID000005391 | CID000005394 | CID000005401 |
| CID000005403 | CID000005419 | CID000005426 | CID000005430 | CID000005453 |
| CID000005454 | CID000005478 | CID000005479 | CID000005487 | CID000005503 |
| CID000005516 | CID000005523 | CID000005530 | CID000005533 | CID000005538 |
| CID000005546 | CID000005556 | CID000005572 | CID000005584 | CID000005625 |
| CID000005656 | CID000005672 | CID000005732 | CID000005775 | CID000005978 |
| CID000006691 | CID000010100 | CID000010631 | CID000013342 | CID000014888 |
| CID000027400 | CID000027661 | CID000027686 | CID000041781 | CID000054454 |
| CID000057469 | CID000059768 | CID000060754 | CID000060787 | CID000060953 |
| CID000062816 | CID000064147 | CID000065999 | CID000068740 | CID000071273 |
| CID000077993 | CID000083786 | CID000093860 | CID000104865 | CID000130881 |

CID000147912 CID000148211 CID000158440 CID004659569 CID005229711  
CID005281104 CID006436173

(70)  $S_{70}$  : 219 drug compounds having side effect "Chills"

CID000000158 CID000000159 CID000000444 CID000000453 CID000000738  
CID000000750 CID000000772 CID000000807 CID000000937 CID000001065  
CID000001546 CID000001775 CID000001935 CID000001971 CID000001972  
CID000002021 CID000002083 CID000002141 CID000002182 CID000002269  
CID000002284 CID000002349 CID000002375 CID000002474 CID000002476  
CID000002477 CID000002478 CID000002487 CID000002554 CID000002564  
CID000002609 CID000002622 CID000002656 CID000002658 CID000002676  
CID000002725 CID000002764 CID000002771 CID000002781 CID000002801  
CID000002818 CID000002913 CID000002949 CID000002951 CID000002958  
CID000002978 CID000003007 CID000003015 CID000003016 CID000003032  
CID000003043 CID000003100 CID000003121 CID000003143 CID000003148  
CID000003152 CID000003158 CID000003168 CID000003261 CID000003278  
CID000003285 CID000003308 CID000003310 CID000003345 CID000003367  
CID000003373 CID000003379 CID000003394 CID000003403 CID000003404  
CID000003446 CID000003454 CID000003461 CID000003478 CID000003510  
CID000003637 CID000003648 CID000003657 CID000003672 CID000003676  
CID000003734 CID000003736 CID000003737 CID000003739 CID000003741  
CID000003742 CID000003749 CID000003750 CID000003759 CID000003823  
CID000003825 CID000003826 CID000003877 CID000003878 CID000003883  
CID000003911 CID000003929 CID000003937 CID000003948 CID000003958  
CID000003962 CID000004046 CID000004062 CID000004064 CID000004075  
CID000004086 CID000004091 CID000004112 CID000004158 CID000004170  
CID000004192 CID000004195 CID000004196 CID000004205 CID000004212  
CID000004236 CID000004253 CID000004259 CID000004409 CID000004428  
CID000004440 CID000004449 CID000004485 CID000004509 CID000004539  
CID000004583 CID000004585 CID000004635 CID000004638 CID000004666  
CID000004679 CID000004736 CID000004739 CID000004745 CID000004819  
CID000004885 CID000004889 CID000004913 CID000004915 CID000004943  
CID000005002 CID000005005 CID000005029 CID000005040 CID000005070  
CID000005076 CID000005078 CID000005090 CID000005155 CID000005195  
CID000005212 CID000005215 CID000005344 CID000005352 CID000005358  
CID000005372 CID000005379 CID000005396 CID000005404 CID000005408  
CID000005426 CID000005430 CID000005466 CID000005486 CID000005496  
CID000005515 CID000005523 CID000005530 CID000005533 CID000005625  
CID000005645 CID000005651 CID000005718 CID000005719 CID000005726  
CID000005731 CID000005735 CID000006049 CID000006691 CID000010631  
CID000027991 CID000038904 CID000039860 CID000041693 CID000047725  
CID000051634 CID000054454 CID000054547 CID000054688 CID000060184  
CID000060612 CID000060613 CID000060795 CID000060843 CID000062959  
CID000068740 CID000071158 CID000071273 CID000071616 CID000077993

|              |              |              |              |              |
|--------------|--------------|--------------|--------------|--------------|
| CID000082146 | CID000083786 | CID000119607 | CID000122316 | CID000123606 |
| CID000125017 | CID000125889 | CID000148211 | CID000150610 | CID000170361 |
| CID000450096 | CID003062316 | CID003081884 | CID004659569 | CID005229711 |
| CID005281104 | CID005282044 | CID005329102 | CID005381226 |              |

(71)  $S_{71}$ : 208 drug compounds having side effect "Peripheral edema"

|              |              |              |              |              |
|--------------|--------------|--------------|--------------|--------------|
| CID000000085 | CID000000159 | CID000000444 | CID000000450 | CID000000596 |
| CID000000598 | CID000000772 | CID000000937 | CID000000942 | CID000001125 |
| CID000001690 | CID000001935 | CID000001972 | CID000002022 | CID000002088 |
| CID000002130 | CID000002162 | CID000002182 | CID000002187 | CID000002216 |
| CID000002250 | CID000002284 | CID000002311 | CID000002375 | CID000002405 |
| CID000002512 | CID000002520 | CID000002541 | CID000002554 | CID000002578 |
| CID000002585 | CID000002609 | CID000002662 | CID000002678 | CID000002726 |
| CID000002764 | CID000002771 | CID000002806 | CID000003016 | CID000003032 |
| CID000003075 | CID000003121 | CID000003125 | CID000003143 | CID000003148 |
| CID000003152 | CID000003203 | CID000003285 | CID000003333 | CID000003339 |
| CID000003342 | CID000003345 | CID000003350 | CID000003372 | CID000003379 |
| CID000003386 | CID000003404 | CID000003410 | CID000003446 | CID000003449 |
| CID000003461 | CID000003648 | CID000003702 | CID000003724 | CID000003741 |
| CID000003749 | CID000003793 | CID000003878 | CID000003883 | CID000003899 |
| CID000003902 | CID000003911 | CID000003937 | CID000004054 | CID000004064 |
| CID000004075 | CID000004091 | CID000004163 | CID000004171 | CID000004205 |
| CID000004236 | CID000004253 | CID000004259 | CID000004449 | CID000004485 |
| CID000004493 | CID000004510 | CID000004547 | CID000004585 | CID000004594 |
| CID000004609 | CID000004634 | CID000004635 | CID000004679 | CID000004691 |
| CID000004739 | CID000004745 | CID000004748 | CID000004819 | CID000004829 |
| CID000004885 | CID000004917 | CID000004920 | CID000005002 | CID000005005 |
| CID000005029 | CID000005035 | CID000005038 | CID000005040 | CID000005070 |
| CID000005073 | CID000005076 | CID000005077 | CID000005090 | CID000005095 |
| CID000005195 | CID000005203 | CID000005210 | CID000005212 | CID000005245 |
| CID000005291 | CID000005372 | CID000005376 | CID000005379 | CID000005381 |
| CID000005394 | CID000005401 | CID000005408 | CID000005426 | CID000005452 |
| CID000005454 | CID000005466 | CID000005478 | CID000005512 | CID000005514 |
| CID000005523 | CID000005525 | CID000005538 | CID000005566 | CID000005596 |
| CID000005625 | CID000005645 | CID000005719 | CID000005731 | CID000005734 |
| CID000005735 | CID000010631 | CID000012536 | CID000019090 | CID000027661 |
| CID000027991 | CID000030623 | CID000032797 | CID000041744 | CID000042615 |
| CID000054547 | CID000054786 | CID000056959 | CID000057537 | CID000060184 |
| CID000060198 | CID000060612 | CID000060613 | CID000060795 | CID000060953 |
| CID000062867 | CID000062959 | CID000064147 | CID000065999 | CID000068740 |
| CID000071158 | CID000071273 | CID000071301 | CID000071329 | CID000071616 |
| CID000072054 | CID000072938 | CID000077993 | CID000082146 | CID000093860 |
| CID000104741 | CID000104865 | CID000119607 | CID000123631 | CID000125889 |
| CID000130881 | CID000147912 | CID000148192 | CID000166548 | CID000197712 |

|              |              |              |              |              |
|--------------|--------------|--------------|--------------|--------------|
| CID000213039 | CID000216239 | CID000216326 | CID000443871 | CID000477468 |
| CID003002190 | CID003081884 | CID004479097 | CID004659569 | CID005281104 |
| CID005282044 | CID005311027 | CID005311181 | CID005329102 | CID005487301 |
| CID005493444 | CID006323497 | CID009571074 |              |              |

(72)  $S_{72}$  : 216 drug compounds having side effect "Epistaxis"

|              |              |              |              |              |
|--------------|--------------|--------------|--------------|--------------|
| CID000000159 | CID000000444 | CID000000772 | CID000000942 | CID000001546 |
| CID000001690 | CID000001775 | CID000001935 | CID000001972 | CID000002083 |
| CID000002118 | CID000002162 | CID000002182 | CID000002249 | CID000002250 |
| CID000002267 | CID000002369 | CID000002375 | CID000002462 | CID000002477 |
| CID000002478 | CID000002487 | CID000002512 | CID000002541 | CID000002656 |
| CID000002662 | CID000002676 | CID000002678 | CID000002751 | CID000002764 |
| CID000002771 | CID000002786 | CID000002801 | CID000002802 | CID000002806 |
| CID000002818 | CID000002909 | CID000003032 | CID000003066 | CID000003075 |
| CID000003121 | CID000003143 | CID000003148 | CID000003152 | CID000003154 |
| CID000003157 | CID000003261 | CID000003333 | CID000003345 | CID000003348 |
| CID000003365 | CID000003367 | CID000003379 | CID000003385 | CID000003386 |
| CID000003394 | CID000003404 | CID000003419 | CID000003446 | CID000003449 |
| CID000003475 | CID000003510 | CID000003648 | CID000003672 | CID000003715 |
| CID000003736 | CID000003746 | CID000003749 | CID000003784 | CID000003825 |
| CID000003826 | CID000003827 | CID000003869 | CID000003878 | CID000003883 |
| CID000003899 | CID000003911 | CID000003937 | CID000003948 | CID000003961 |
| CID000004075 | CID000004112 | CID000004158 | CID000004170 | CID000004205 |
| CID000004236 | CID000004259 | CID000004264 | CID000004428 | CID000004449 |
| CID000004451 | CID000004485 | CID000004583 | CID000004585 | CID000004594 |
| CID000004603 | CID000004609 | CID000004634 | CID000004635 | CID000004679 |
| CID000004691 | CID000004740 | CID000004745 | CID000004819 | CID000004856 |
| CID000004885 | CID000004893 | CID000004915 | CID000004932 | CID000004991 |
| CID000005002 | CID000005029 | CID000005038 | CID000005040 | CID000005052 |
| CID000005070 | CID000005073 | CID000005076 | CID000005077 | CID000005078 |
| CID000005090 | CID000005095 | CID000005152 | CID000005195 | CID000005203 |
| CID000005210 | CID000005212 | CID000005291 | CID000005352 | CID000005372 |
| CID000005379 | CID000005401 | CID000005426 | CID000005466 | CID000005472 |
| CID000005496 | CID000005508 | CID000005514 | CID000005523 | CID000005525 |
| CID000005538 | CID000005544 | CID000005625 | CID000005645 | CID000005650 |
| CID000005656 | CID000005718 | CID000005719 | CID000005731 | CID000005732 |
| CID000005735 | CID000010631 | CID000014888 | CID000027661 | CID000027686 |
| CID000027991 | CID000031477 | CID000034312 | CID000039860 | CID000041317 |
| CID000042615 | CID000047725 | CID000054547 | CID000054786 | CID000059708 |
| CID000060184 | CID000060613 | CID000060787 | CID000060795 | CID000060865 |
| CID000060953 | CID000062924 | CID000062959 | CID000065999 | CID000071158 |
| CID000071616 | CID000077992 | CID000077993 | CID000083786 | CID000093860 |
| CID000096312 | CID000104865 | CID000110634 | CID000110635 | CID000119182 |
| CID000119607 | CID000122316 | CID000123606 | CID000123620 | CID000123631 |

|              |              |              |              |              |
|--------------|--------------|--------------|--------------|--------------|
| CID000124087 | CID000125017 | CID000125889 | CID000147912 | CID000148211 |
| CID000150610 | CID000158440 | CID000163742 | CID000170361 | CID000176870 |
| CID000216239 | CID000216326 | CID000444013 | CID000444033 | CID000477468 |
| CID003081884 | CID004183806 | CID004659568 | CID004659569 | CID005229711 |
| CID005281104 | CID005311181 | CID005311297 | CID005329102 | CID005493444 |
| CID006447131 |              |              |              |              |

(73)  $S_{73}$ : 211 drug compounds having side effect "Photosensitivity"

|              |              |              |              |              |
|--------------|--------------|--------------|--------------|--------------|
| CID00000444  | CID000001046 | CID000001065 | CID000001690 | CID000001775 |
| CID000001986 | CID000002022 | CID000002088 | CID000002156 | CID000002182 |
| CID000002250 | CID000002266 | CID000002269 | CID000002311 | CID000002315 |
| CID000002405 | CID000002550 | CID000002554 | CID000002564 | CID000002585 |
| CID000002662 | CID000002676 | CID000002678 | CID000002719 | CID000002720 |
| CID000002725 | CID000002726 | CID000002727 | CID000002732 | CID000002751 |
| CID000002764 | CID000002769 | CID000002771 | CID000002781 | CID000002786 |
| CID000002801 | CID000002818 | CID000002913 | CID000002949 | CID000002983 |
| CID000003007 | CID000003015 | CID000003032 | CID000003059 | CID000003075 |
| CID000003100 | CID000003121 | CID000003157 | CID000003203 | CID000003222 |
| CID000003261 | CID000003308 | CID000003325 | CID000003333 | CID000003339 |
| CID000003355 | CID000003366 | CID000003372 | CID000003385 | CID000003386 |
| CID000003394 | CID000003397 | CID000003403 | CID000003404 | CID000003419 |
| CID000003440 | CID000003454 | CID000003463 | CID000003475 | CID000003476 |
| CID000003478 | CID000003488 | CID000003510 | CID000003559 | CID000003598 |
| CID000003639 | CID000003647 | CID000003648 | CID000003652 | CID000003672 |
| CID000003702 | CID000003749 | CID000003759 | CID000003793 | CID000003825 |
| CID000003826 | CID000003878 | CID000003911 | CID000003937 | CID000003948 |
| CID000003961 | CID000003962 | CID000003964 | CID000004044 | CID000004075 |
| CID000004100 | CID000004112 | CID000004121 | CID000004158 | CID000004170 |
| CID000004171 | CID000004200 | CID000004205 | CID000004236 | CID000004259 |
| CID000004409 | CID000004421 | CID000004440 | CID000004449 | CID000004485 |
| CID000004539 | CID000004583 | CID000004585 | CID000004594 | CID000004614 |
| CID000004635 | CID000004645 | CID000004666 | CID000004679 | CID000004691 |
| CID000004739 | CID000004748 | CID000004819 | CID000004856 | CID000004870 |
| CID000004885 | CID000004889 | CID000004915 | CID000004917 | CID000004927 |
| CID000005002 | CID000005005 | CID000005029 | CID000005038 | CID000005039 |
| CID000005070 | CID000005073 | CID000005076 | CID000005078 | CID000005090 |
| CID000005095 | CID000005195 | CID000005203 | CID000005210 | CID000005212 |
| CID000005253 | CID000005291 | CID000005344 | CID000005352 | CID000005358 |
| CID000005372 | CID000005379 | CID000005394 | CID000005401 | CID000005402 |
| CID000005412 | CID000005426 | CID000005452 | CID000005454 | CID000005466 |
| CID000005496 | CID000005503 | CID000005505 | CID000005514 | CID000005523 |
| CID000005525 | CID000005533 | CID000005538 | CID000005544 | CID000005546 |
| CID000005566 | CID000005596 | CID000005645 | CID000005647 | CID000005650 |
| CID000005656 | CID000005718 | CID000005719 | CID000005731 | CID000005732 |

|              |              |              |              |              |
|--------------|--------------|--------------|--------------|--------------|
| CID000005735 | CID000027686 | CID000034312 | CID000039042 | CID000039860 |
| CID000041317 | CID000042615 | CID000054454 | CID000057469 | CID000060613 |
| CID000060787 | CID000060795 | CID000060953 | CID000062867 | CID000062959 |
| CID000064147 | CID000071158 | CID000071616 | CID000072938 | CID000110634 |
| CID000119607 | CID000122316 | CID000123606 | CID000125889 | CID000130881 |
| CID000148192 | CID000170361 | CID002761171 | CID003062316 | CID003081884 |
| CID005362420 |              |              |              |              |

(74)  $S_{74}$  : 204 drug compounds having side effect "Hyperglycemia"

|              |              |              |              |              |
|--------------|--------------|--------------|--------------|--------------|
| CID000000444 | CID000000596 | CID000000767 | CID000001690 | CID000001775 |
| CID000001971 | CID000001972 | CID000002083 | CID000002099 | CID000002153 |
| CID000002162 | CID000002177 | CID000002250 | CID000002284 | CID000002315 |
| CID000002369 | CID000002375 | CID000002462 | CID000002471 | CID000002478 |
| CID000002541 | CID000002554 | CID000002578 | CID000002585 | CID000002662 |
| CID000002720 | CID000002726 | CID000002732 | CID000002751 | CID000002764 |
| CID000002769 | CID000002771 | CID000002801 | CID000002818 | CID000002907 |
| CID000002909 | CID000003000 | CID000003003 | CID000003015 | CID000003019 |
| CID000003032 | CID000003043 | CID000003075 | CID000003152 | CID000003154 |
| CID000003157 | CID000003278 | CID000003308 | CID000003345 | CID000003355 |
| CID000003367 | CID000003382 | CID000003386 | CID000003394 | CID000003404 |
| CID000003410 | CID000003440 | CID000003446 | CID000003449 | CID000003461 |
| CID000003559 | CID000003639 | CID000003647 | CID000003648 | CID000003661 |
| CID000003672 | CID000003702 | CID000003706 | CID000003715 | CID000003763 |
| CID000003767 | CID000003793 | CID000003826 | CID000003877 | CID000003878 |
| CID000003883 | CID000003899 | CID000003911 | CID000003929 | CID000003948 |
| CID000003961 | CID000004044 | CID000004054 | CID000004121 | CID000004170 |
| CID000004212 | CID000004236 | CID000004259 | CID000004409 | CID000004436 |
| CID000004440 | CID000004451 | CID000004485 | CID000004493 | CID000004583 |
| CID000004585 | CID000004609 | CID000004614 | CID000004635 | CID000004666 |
| CID000004679 | CID000004691 | CID000004745 | CID000004748 | CID000004829 |
| CID000004856 | CID000004870 | CID000004885 | CID000004894 | CID000004917 |
| CID000004932 | CID000004943 | CID000005002 | CID000005005 | CID000005029 |
| CID000005040 | CID000005073 | CID000005076 | CID000005077 | CID000005095 |
| CID000005152 | CID000005155 | CID000005195 | CID000005203 | CID000005206 |
| CID000005210 | CID000005212 | CID000005352 | CID000005358 | CID000005372 |
| CID000005379 | CID000005394 | CID000005426 | CID000005430 | CID000005454 |
| CID000005466 | CID000005478 | CID000005487 | CID000005514 | CID000005523 |
| CID000005525 | CID000005566 | CID000005591 | CID000005625 | CID000005656 |
| CID000005718 | CID000005719 | CID000005731 | CID000005732 | CID000009433 |
| CID000012536 | CID000014888 | CID000019090 | CID000020585 | CID000028112 |
| CID000031378 | CID000032797 | CID000034312 | CID000041744 | CID000041781 |
| CID000054547 | CID000060612 | CID000060613 | CID000060787 | CID000060795 |
| CID000060877 | CID000060953 | CID000062924 | CID000062959 | CID000064147 |
| CID000065027 | CID000071158 | CID000071273 | CID000071616 | CID000072938 |

|              |              |              |              |              |
|--------------|--------------|--------------|--------------|--------------|
| CID000074989 | CID000077993 | CID000077999 | CID000082146 | CID000093860 |
| CID000096312 | CID000104865 | CID000115237 | CID000119607 | CID000123606 |
| CID000125889 | CID000130881 | CID000145068 | CID000147912 | CID000148192 |
| CID000148211 | CID000151165 | CID000153941 | CID000158440 | CID000166548 |
| CID000213039 | CID000315411 | CID000444013 | CID000477468 | CID004659568 |
| CID005282044 | CID005329102 | CID005481350 | CID009571074 |              |

(75)  $S_{75}$ : 201 drug compounds having side effect "Pneumonia"

|              |              |              |              |              |
|--------------|--------------|--------------|--------------|--------------|
| CID000000159 | CID000000444 | CID000000450 | CID000000596 | CID000000598 |
| CID000000772 | CID000001065 | CID000001546 | CID000001690 | CID000001775 |
| CID000001935 | CID000001971 | CID000001972 | CID000001978 | CID000002156 |
| CID000002182 | CID000002215 | CID000002232 | CID000002250 | CID000002284 |
| CID000002311 | CID000002315 | CID000002369 | CID000002375 | CID000002405 |
| CID000002478 | CID000002550 | CID000002554 | CID000002578 | CID000002585 |
| CID000002662 | CID000002678 | CID000002708 | CID000002720 | CID000002771 |
| CID000002801 | CID000002802 | CID000002806 | CID000002818 | CID000002907 |
| CID000002909 | CID000003016 | CID000003032 | CID000003121 | CID000003143 |
| CID000003148 | CID000003152 | CID000003157 | CID000003203 | CID000003222 |
| CID000003279 | CID000003308 | CID000003325 | CID000003339 | CID000003345 |
| CID000003355 | CID000003367 | CID000003372 | CID000003379 | CID000003386 |
| CID000003394 | CID000003404 | CID000003419 | CID000003446 | CID000003449 |
| CID000003454 | CID000003461 | CID000003475 | CID000003639 | CID000003648 |
| CID000003672 | CID000003702 | CID000003750 | CID000003793 | CID000003826 |
| CID000003883 | CID000003899 | CID000003911 | CID000003937 | CID000003961 |
| CID000004044 | CID000004046 | CID000004053 | CID000004054 | CID000004075 |
| CID000004112 | CID000004121 | CID000004158 | CID000004170 | CID000004171 |
| CID000004205 | CID000004212 | CID000004236 | CID000004428 | CID000004440 |
| CID000004449 | CID000004493 | CID000004542 | CID000004585 | CID000004603 |
| CID000004609 | CID000004614 | CID000004635 | CID000004666 | CID000004679 |
| CID000004691 | CID000004739 | CID000004745 | CID000004819 | CID000004856 |
| CID000004885 | CID000004915 | CID000004920 | CID000005002 | CID000005005 |
| CID000005029 | CID000005035 | CID000005038 | CID000005039 | CID000005040 |
| CID000005064 | CID000005070 | CID000005073 | CID000005077 | CID000005090 |
| CID000005095 | CID000005152 | CID000005195 | CID000005245 | CID000005291 |
| CID000005344 | CID000005352 | CID000005372 | CID000005376 | CID000005394 |
| CID000005408 | CID000005426 | CID000005466 | CID000005487 | CID000005514 |
| CID000005515 | CID000005523 | CID000005525 | CID000005538 | CID000005565 |
| CID000005645 | CID000005656 | CID000005672 | CID000005719 | CID000005731 |
| CID000005732 | CID000019090 | CID000027661 | CID000030623 | CID000034312 |
| CID000050294 | CID000060184 | CID000060787 | CID000060795 | CID000060852 |
| CID000060877 | CID000060953 | CID000062867 | CID000062924 | CID000064147 |
| CID000065027 | CID000065999 | CID000071158 | CID000082146 | CID000093860 |
| CID000096312 | CID000104865 | CID000119182 | CID000119607 | CID000123631 |
| CID000125889 | CID000130881 | CID000147912 | CID000150610 | CID000151165 |



|              |              |              |              |              |
|--------------|--------------|--------------|--------------|--------------|
| CID000163742 | CID000176870 | CID000197712 | CID000216326 | CID000444013 |
| CID000444033 | CID000477468 | CID003062316 | CID003081884 | CID003086672 |
| CID004183806 | CID004659568 | CID004659569 | CID005281104 | CID005311181 |
| CID005311297 | CID005353980 | CID005362070 | CID005362420 | CID005481350 |
| CID006447131 |              |              |              |              |

(76)  $S_{76}$  : 199 drug compounds having side effect "Myocardial infarction"

|              |              |              |              |              |
|--------------|--------------|--------------|--------------|--------------|
| CID000000158 | CID000000159 | CID000000191 | CID000000444 | CID000000807 |
| CID000000853 | CID000000861 | CID000001125 | CID000001935 | CID000001972 |
| CID000002140 | CID000002141 | CID000002160 | CID000002162 | CID000002170 |
| CID000002182 | CID000002187 | CID000002232 | CID000002311 | CID000002369 |
| CID000002375 | CID000002405 | CID000002443 | CID000002477 | CID000002520 |
| CID000002541 | CID000002554 | CID000002662 | CID000002751 | CID000002764 |
| CID000002771 | CID000002801 | CID000002818 | CID000002895 | CID000002907 |
| CID000002909 | CID000002958 | CID000002995 | CID000003003 | CID000003007 |
| CID000003015 | CID000003019 | CID000003032 | CID000003066 | CID000003075 |
| CID000003108 | CID000003143 | CID000003148 | CID000003152 | CID000003154 |
| CID000003157 | CID000003222 | CID000003285 | CID000003308 | CID000003310 |
| CID000003333 | CID000003339 | CID000003340 | CID000003345 | CID000003367 |
| CID000003385 | CID000003386 | CID000003394 | CID000003404 | CID000003410 |
| CID000003419 | CID000003446 | CID000003461 | CID000003475 | CID000003519 |
| CID000003640 | CID000003648 | CID000003661 | CID000003672 | CID000003696 |
| CID000003706 | CID000003724 | CID000003734 | CID000003741 | CID000003749 |
| CID000003750 | CID000003784 | CID000003825 | CID000003826 | CID000003878 |
| CID000003883 | CID000003902 | CID000003911 | CID000003948 | CID000004011 |
| CID000004044 | CID000004054 | CID000004140 | CID000004159 | CID000004205 |
| CID000004212 | CID000004259 | CID000004409 | CID000004428 | CID000004440 |
| CID000004473 | CID000004485 | CID000004539 | CID000004547 | CID000004583 |
| CID000004595 | CID000004614 | CID000004666 | CID000004679 | CID000004691 |
| CID000004745 | CID000004819 | CID000004829 | CID000004856 | CID000004885 |
| CID000004894 | CID000004943 | CID000004976 | CID000005005 | CID000005029 |
| CID000005070 | CID000005073 | CID000005076 | CID000005077 | CID000005078 |
| CID000005090 | CID000005095 | CID000005195 | CID000005203 | CID000005210 |
| CID000005212 | CID000005234 | CID000005358 | CID000005372 | CID000005376 |
| CID000005426 | CID000005466 | CID000005487 | CID000005516 | CID000005523 |
| CID000005533 | CID000005538 | CID000005544 | CID000005584 | CID000005645 |
| CID000005656 | CID000005672 | CID000005731 | CID000005732 | CID000005978 |
| CID000010631 | CID000013342 | CID000018140 | CID000027661 | CID000027991 |
| CID000031477 | CID000039042 | CID000041317 | CID000042113 | CID000047725 |
| CID000057469 | CID000059768 | CID000060198 | CID000060612 | CID000060754 |
| CID000060795 | CID000060953 | CID000065999 | CID000071158 | CID000071273 |
| CID000071301 | CID000071329 | CID000071616 | CID000077992 | CID000077993 |
| CID000077999 | CID000093860 | CID000104865 | CID000110634 | CID000110635 |
| CID000119607 | CID000122316 | CID000123606 | CID000125017 | CID000125889 |

|              |              |              |              |              |
|--------------|--------------|--------------|--------------|--------------|
| CID000147912 | CID000151165 | CID000158440 | CID000170361 | CID000176870 |
| CID000213039 | CID000216326 | CID000477468 | CID003062316 | CID003081884 |
| CID004183806 | CID004659569 | CID005281104 | CID006398970 |              |

(77)  $S_{77}$  : 199 drug compounds having side effect "Pancreatitis"

|              |              |              |              |              |
|--------------|--------------|--------------|--------------|--------------|
| CID000000444 | CID000000450 | CID000000596 | CID000000738 | CID000001690 |
| CID000001935 | CID000001971 | CID000002156 | CID000002162 | CID000002170 |
| CID000002182 | CID000002250 | CID000002265 | CID000002269 | CID000002311 |
| CID000002315 | CID000002478 | CID000002524 | CID000002550 | CID000002554 |
| CID000002662 | CID000002676 | CID000002720 | CID000002732 | CID000002751 |
| CID000002756 | CID000002764 | CID000002771 | CID000002806 | CID000002909 |
| CID000002949 | CID000002955 | CID000002983 | CID000003003 | CID000003015 |
| CID000003032 | CID000003043 | CID000003121 | CID000003148 | CID000003152 |
| CID000003203 | CID000003222 | CID000003255 | CID000003285 | CID000003308 |
| CID000003342 | CID000003386 | CID000003394 | CID000003403 | CID000003404 |
| CID000003414 | CID000003419 | CID000003440 | CID000003446 | CID000003454 |
| CID000003639 | CID000003640 | CID000003647 | CID000003657 | CID000003672 |
| CID000003690 | CID000003702 | CID000003706 | CID000003750 | CID000003825 |
| CID000003826 | CID000003877 | CID000003878 | CID000003883 | CID000003899 |
| CID000003929 | CID000003937 | CID000003961 | CID000003962 | CID000004044 |
| CID000004075 | CID000004112 | CID000004121 | CID000004138 | CID000004158 |
| CID000004159 | CID000004170 | CID000004173 | CID000004178 | CID000004200 |
| CID000004205 | CID000004259 | CID000004409 | CID000004451 | CID000004509 |
| CID000004539 | CID000004547 | CID000004583 | CID000004585 | CID000004594 |
| CID000004599 | CID000004609 | CID000004614 | CID000004666 | CID000004679 |
| CID000004691 | CID000004727 | CID000004745 | CID000004775 | CID000004819 |
| CID000004856 | CID000004870 | CID000004885 | CID000004889 | CID000004893 |
| CID000004894 | CID000004900 | CID000004915 | CID000004932 | CID000004943 |
| CID000005002 | CID000005005 | CID000005029 | CID000005038 | CID000005039 |
| CID000005040 | CID000005064 | CID000005070 | CID000005073 | CID000005076 |
| CID000005077 | CID000005090 | CID000005095 | CID000005155 | CID000005203 |
| CID000005215 | CID000005291 | CID000005344 | CID000005352 | CID000005358 |
| CID000005372 | CID000005376 | CID000005379 | CID000005426 | CID000005514 |
| CID000005523 | CID000005525 | CID000005538 | CID000005544 | CID000005625 |
| CID000005645 | CID000005656 | CID000005672 | CID000005718 | CID000005726 |
| CID000005731 | CID000010631 | CID000031378 | CID000034312 | CID000041317 |
| CID000054454 | CID000054688 | CID000059708 | CID000060184 | CID000060613 |
| CID000060787 | CID000060795 | CID000060877 | CID000062959 | CID000064147 |
| CID000065027 | CID000071158 | CID000071616 | CID000072938 | CID000074989 |
| CID000082146 | CID000083786 | CID000093860 | CID000119607 | CID000123631 |
| CID000125889 | CID000130881 | CID000147912 | CID000148192 | CID000150311 |
| CID000150610 | CID000153941 | CID000176870 | CID000213039 | CID000216239 |
| CID000216326 | CID000222786 | CID000667490 | CID003002190 | CID003062316 |
| CID003081884 | CID005281104 | CID005282044 | CID005311297 | CID005329102 |

CID005353980 CID005362070 CID005481350 CID006323497

(78)  $S_{78}$ : 199 drug compounds having side effect "Neutropenia"

CID000000143 CID000000596 CID000001065 CID000001125 CID000001134  
CID000001971 CID000002019 CID000002022 CID000002082 CID000002130  
CID000002140 CID000002145 CID000002156 CID000002171 CID000002179  
CID000002269 CID000002274 CID000002311 CID000002349 CID000002375  
CID000002541 CID000002559 CID000002575 CID000002578 CID000002609  
CID000002610 CID000002617 CID000002629 CID000002631 CID000002637  
CID000002646 CID000002650 CID000002654 CID000002655 CID000002656  
CID000002658 CID000002666 CID000002673 CID000002675 CID000002708  
CID000002719 CID000002751 CID000002756 CID000002786 CID000002806  
CID000002818 CID000002907 CID000002958 CID000002983 CID000003015  
CID000003016 CID000003040 CID000003114 CID000003143 CID000003222  
CID000003278 CID000003279 CID000003308 CID000003310 CID000003324  
CID000003325 CID000003345 CID000003365 CID000003367 CID000003385  
CID000003394 CID000003414 CID000003419 CID000003461 CID000003657  
CID000003672 CID000003685 CID000003690 CID000003734 CID000003741  
CID000003749 CID000003750 CID000003793 CID000003877 CID000003878  
CID000003883 CID000003899 CID000003928 CID000003929 CID000003937  
CID000003956 CID000004030 CID000004036 CID000004053 CID000004060  
CID000004075 CID000004091 CID000004112 CID000004163 CID000004168  
CID000004173 CID000004178 CID000004200 CID000004205 CID000004212  
CID000004451 CID000004463 CID000004539 CID000004583 CID000004585  
CID000004594 CID000004607 CID000004609 CID000004645 CID000004834  
CID000004913 CID000004915 CID000005002 CID000005029 CID000005038  
CID000005039 CID000005040 CID000005064 CID000005070 CID000005073  
CID000005076 CID000005155 CID000005291 CID000005300 CID000005352  
CID000005372 CID000005376 CID000005379 CID000005394 CID000005396  
CID000005402 CID000005412 CID000005453 CID000005479 CID000005514  
CID000005515 CID000005538 CID000005578 CID000005582 CID000005625  
CID000005650 CID000005651 CID000005656 CID000005672 CID000005717  
CID000005718 CID000005721 CID000005726 CID000005978 CID000014888  
CID000027686 CID000030623 CID000034312 CID000038904 CID000041317  
CID000047725 CID000050294 CID000050614 CID000051634 CID000054547  
CID000054688 CID000059708 CID000060184 CID000060613 CID000060787  
CID000060795 CID000060843 CID000060877 CID000060953 CID000064147  
CID000065027 CID000068740 CID000074989 CID000082146 CID000093860  
CID000096312 CID000104758 CID000119182 CID000123631 CID000150610  
CID000151165 CID000153941 CID000166548 CID000216239 CID000216326  
CID000477468 CID003002190 CID003062316 CID005281007 CID005282044  
CID005329102 CID005353980 CID005361912 CID005493381 CID006323497  
CID006398970 CID006436173 CID006918453 CID009571074

(79)  $S_{79}$  : 204 drug compounds having side effect “Weight gain”

|              |              |              |              |              |
|--------------|--------------|--------------|--------------|--------------|
| CID000000085 | CID000000159 | CID000000444 | CID000000450 | CID000000596 |
| CID000000767 | CID000000942 | CID000001690 | CID000001935 | CID000001972 |
| CID000001978 | CID000002118 | CID000002160 | CID000002162 | CID000002170 |
| CID000002179 | CID000002182 | CID000002187 | CID000002250 | CID000002267 |
| CID000002284 | CID000002369 | CID000002375 | CID000002405 | CID000002462 |
| CID000002477 | CID000002478 | CID000002512 | CID000002554 | CID000002585 |
| CID000002662 | CID000002678 | CID000002771 | CID000002800 | CID000002801 |
| CID000002802 | CID000002803 | CID000002818 | CID000002895 | CID000002907 |
| CID000002909 | CID000002913 | CID000002949 | CID000002995 | CID000003003 |
| CID000003015 | CID000003043 | CID000003075 | CID000003114 | CID000003121 |
| CID000003143 | CID000003152 | CID000003157 | CID000003158 | CID000003261 |
| CID000003285 | CID000003339 | CID000003379 | CID000003404 | CID000003419 |
| CID000003446 | CID000003475 | CID000003518 | CID000003639 | CID000003640 |
| CID000003675 | CID000003696 | CID000003715 | CID000003784 | CID000003825 |
| CID000003826 | CID000003827 | CID000003878 | CID000003883 | CID000003902 |
| CID000003911 | CID000003937 | CID000003961 | CID000003964 | CID000004060 |
| CID000004075 | CID000004078 | CID000004095 | CID000004138 | CID000004158 |
| CID000004163 | CID000004171 | CID000004201 | CID000004205 | CID000004212 |
| CID000004236 | CID000004259 | CID000004409 | CID000004411 | CID000004428 |
| CID000004449 | CID000004485 | CID000004493 | CID000004536 | CID000004542 |
| CID000004543 | CID000004585 | CID000004594 | CID000004609 | CID000004614 |
| CID000004679 | CID000004723 | CID000004745 | CID000004775 | CID000004828 |
| CID000004829 | CID000004845 | CID000004885 | CID000004889 | CID000004893 |
| CID000004894 | CID000004920 | CID000004976 | CID000005002 | CID000005005 |
| CID000005029 | CID000005035 | CID000005038 | CID000005040 | CID000005052 |
| CID000005070 | CID000005073 | CID000005077 | CID000005090 | CID000005095 |
| CID000005195 | CID000005212 | CID000005291 | CID000005358 | CID000005372 |
| CID000005376 | CID000005394 | CID000005401 | CID000005408 | CID000005426 |
| CID000005452 | CID000005466 | CID000005508 | CID000005512 | CID000005514 |
| CID000005515 | CID000005533 | CID000005538 | CID000005544 | CID000005584 |
| CID000005591 | CID000005596 | CID000005625 | CID000005645 | CID000005656 |
| CID000005665 | CID000005719 | CID000005734 | CID000005735 | CID000010631 |
| CID000014888 | CID000019090 | CID000023897 | CID000027400 | CID000027661 |
| CID000027991 | CID000028112 | CID000034312 | CID000040976 | CID000041317 |
| CID000042615 | CID000047725 | CID000054547 | CID000057537 | CID000059708 |
| CID000060198 | CID000060613 | CID000060787 | CID000060795 | CID000060865 |
| CID000060953 | CID000062819 | CID000062924 | CID000062959 | CID000068740 |
| CID000071158 | CID000072054 | CID000077993 | CID000077999 | CID000082146 |
| CID000083786 | CID000104865 | CID000115237 | CID000119607 | CID000125889 |
| CID000147912 | CID000148192 | CID000170361 | CID000213039 | CID000216326 |
| CID000444033 | CID003062316 | CID003081884 | CID005473385 |              |

(80)  $S_{80}$ : 194 drug compounds having side effect "Stomatitis"

|              |              |              |              |              |
|--------------|--------------|--------------|--------------|--------------|
| CID000000143 | CID000000298 | CID000000444 | CID000000581 | CID000000937 |
| CID000000942 | CID000001690 | CID000001935 | CID000001972 | CID000002160 |
| CID000002170 | CID000002173 | CID000002179 | CID000002250 | CID000002269 |
| CID000002349 | CID000002478 | CID000002554 | CID000002578 | CID000002656 |
| CID000002662 | CID000002678 | CID000002713 | CID000002764 | CID000002771 |
| CID000002806 | CID000002895 | CID000002907 | CID000002909 | CID000002958 |
| CID000002995 | CID000003032 | CID000003040 | CID000003059 | CID000003121 |
| CID000003143 | CID000003148 | CID000003151 | CID000003161 | CID000003222 |
| CID000003308 | CID000003310 | CID000003345 | CID000003367 | CID000003385 |
| CID000003386 | CID000003394 | CID000003404 | CID000003446 | CID000003461 |
| CID000003467 | CID000003648 | CID000003657 | CID000003672 | CID000003676 |
| CID000003685 | CID000003690 | CID000003696 | CID000003702 | CID000003715 |
| CID000003750 | CID000003793 | CID000003825 | CID000003826 | CID000003877 |
| CID000003878 | CID000003883 | CID000003899 | CID000003902 | CID000003928 |
| CID000003929 | CID000003948 | CID000003950 | CID000004011 | CID000004036 |
| CID000004044 | CID000004053 | CID000004064 | CID000004075 | CID000004112 |
| CID000004173 | CID000004200 | CID000004205 | CID000004212 | CID000004259 |
| CID000004409 | CID000004449 | CID000004510 | CID000004539 | CID000004543 |
| CID000004583 | CID000004585 | CID000004594 | CID000004607 | CID000004609 |
| CID000004614 | CID000004634 | CID000004635 | CID000004679 | CID000004691 |
| CID000004739 | CID000004819 | CID000004845 | CID000004856 | CID000004915 |
| CID000004976 | CID000005002 | CID000005029 | CID000005040 | CID000005070 |
| CID000005071 | CID000005073 | CID000005076 | CID000005095 | CID000005195 |
| CID000005203 | CID000005212 | CID000005215 | CID000005344 | CID000005352 |
| CID000005372 | CID000005379 | CID000005394 | CID000005396 | CID000005408 |
| CID000005412 | CID000005426 | CID000005453 | CID000005466 | CID000005479 |
| CID000005508 | CID000005514 | CID000005515 | CID000005523 | CID000005538 |
| CID000005556 | CID000005584 | CID000005625 | CID000005656 | CID000005672 |
| CID000005718 | CID000005719 | CID000005726 | CID000005731 | CID000005734 |
| CID000005735 | CID000005746 | CID000005978 | CID000027686 | CID000030623 |
| CID000034312 | CID000038904 | CID000041317 | CID000054547 | CID000054688 |
| CID000060184 | CID000060613 | CID000060787 | CID000060795 | CID000060843 |
| CID000060953 | CID000062959 | CID000068740 | CID000071616 | CID000072938 |
| CID000077992 | CID000077993 | CID000083786 | CID000093860 | CID000096312 |
| CID000104758 | CID000119607 | CID000122316 | CID000123631 | CID000125889 |
| CID000147912 | CID000150610 | CID000151165 | CID000176870 | CID000216239 |
| CID000216326 | CID002761171 | CID003002190 | CID003062316 | CID003081884 |
| CID005281007 | CID005329102 | CID005353980 | CID005362070 | CID005473385 |
| CID006398970 | CID006918453 | CID009571074 | CID011954225 |              |

(81)  $S_{81}$ : 196 drug compounds having side effect "Stevens - Johnson syndrome"

|              |              |              |              |              |
|--------------|--------------|--------------|--------------|--------------|
| CID000000444 | CID000001065 | CID000001546 | CID000001690 | CID000001775 |
|--------------|--------------|--------------|--------------|--------------|

CID000001971 CID000001972 CID000001986 CID000002022 CID000002082  
 CID000002088 CID000002118 CID000002141 CID000002156 CID000002162  
 CID000002171 CID000002177 CID000002187 CID000002250 CID000002269  
 CID000002311 CID000002520 CID000002550 CID000002554 CID000002585  
 CID000002609 CID000002610 CID000002617 CID000002622 CID000002631  
 CID000002637 CID000002646 CID000002650 CID000002654 CID000002656  
 CID000002658 CID000002662 CID000002666 CID000002675 CID000002676  
 CID000002708 CID000002720 CID000002751 CID000002756 CID000002764  
 CID000002771 CID000002786 CID000002806 CID000002818 CID000002907  
 CID000002949 CID000002983 CID000003007 CID000003032 CID000003059  
 CID000003075 CID000003121 CID000003143 CID000003203 CID000003222  
 CID000003255 CID000003261 CID000003291 CID000003292 CID000003305  
 CID000003308 CID000003310 CID000003324 CID000003325 CID000003342  
 CID000003345 CID000003365 CID000003367 CID000003386 CID000003394  
 CID000003403 CID000003404 CID000003414 CID000003419 CID000003446  
 CID000003454 CID000003639 CID000003652 CID000003672 CID000003702  
 CID000003706 CID000003715 CID000003793 CID000003825 CID000003826  
 CID000003827 CID000003878 CID000003883 CID000003899 CID000003914  
 CID000003928 CID000003929 CID000003937 CID000003948 CID000003954  
 CID000003956 CID000003961 CID000003962 CID000004011 CID000004036  
 CID000004044 CID000004046 CID000004054 CID000004060 CID000004064  
 CID000004100 CID000004112 CID000004121 CID000004158 CID000004170  
 CID000004173 CID000004178 CID000004200 CID000004201 CID000004259  
 CID000004409 CID000004421 CID000004449 CID000004463 CID000004485  
 CID000004509 CID000004539 CID000004547 CID000004583 CID000004594  
 CID000004595 CID000004603 CID000004614 CID000004666 CID000004679  
 CID000004834 CID000004856 CID000004889 CID000004946 CID000004993  
 CID000005002 CID000005005 CID000005029 CID000005038 CID000005073  
 CID000005077 CID000005090 CID000005203 CID000005215 CID000005291  
 CID000005320 CID000005344 CID000005352 CID000005372 CID000005376  
 CID000005379 CID000005394 CID000005402 CID000005426 CID000005430  
 CID000005472 CID000005514 CID000005523 CID000005578 CID000005596  
 CID000005625 CID000005651 CID000005656 CID000005726 CID000006476  
 CID000034312 CID000050614 CID000054454 CID000054547 CID000054688  
 CID000060184 CID000060787 CID000062959 CID000071616 CID000077999  
 CID000083786 CID000104865 CID000110635 CID000119607 CID000123631  
 CID000125889 CID000130881 CID000147912 CID000151165 CID000213039  
 CID003002190 CID005353980 CID005381226 CID006398970 CID006435110  
 CID009571074

(82)  $\mathbb{S}_{82}$  : 195 drug compounds having side effect "Impotence"

CID000000444 CID000000767 CID000000937 CID000001206 CID000001935  
 CID000001978 CID000002092 CID000002156 CID000002160 CID000002170  
 CID000002249 CID000002250 CID000002284 CID000002311 CID000002349

|              |              |              |              |              |
|--------------|--------------|--------------|--------------|--------------|
| CID000002369 | CID000002375 | CID000002405 | CID000002477 | CID000002520 |
| CID000002541 | CID000002550 | CID000002554 | CID000002585 | CID000002720 |
| CID000002726 | CID000002732 | CID000002751 | CID000002756 | CID000002771 |
| CID000002801 | CID000002802 | CID000002803 | CID000002818 | CID000002895 |
| CID000002995 | CID000003007 | CID000003015 | CID000003032 | CID000003042 |
| CID000003075 | CID000003114 | CID000003117 | CID000003125 | CID000003154 |
| CID000003157 | CID000003222 | CID000003325 | CID000003333 | CID000003339 |
| CID000003350 | CID000003355 | CID000003386 | CID000003394 | CID000003397 |
| CID000003404 | CID000003446 | CID000003454 | CID000003463 | CID000003475 |
| CID000003494 | CID000003518 | CID000003519 | CID000003559 | CID000003639 |
| CID000003648 | CID000003675 | CID000003696 | CID000003702 | CID000003759 |
| CID000003784 | CID000003793 | CID000003823 | CID000003825 | CID000003869 |
| CID000003878 | CID000003883 | CID000003911 | CID000003914 | CID000003937 |
| CID000003958 | CID000003961 | CID000004011 | CID000004032 | CID000004054 |
| CID000004057 | CID000004078 | CID000004112 | CID000004138 | CID000004168 |
| CID000004170 | CID000004171 | CID000004178 | CID000004205 | CID000004212 |
| CID000004236 | CID000004253 | CID000004409 | CID000004411 | CID000004449 |
| CID000004473 | CID000004485 | CID000004493 | CID000004513 | CID000004543 |
| CID000004583 | CID000004585 | CID000004594 | CID000004635 | CID000004638 |
| CID000004679 | CID000004691 | CID000004724 | CID000004739 | CID000004745 |
| CID000004771 | CID000004828 | CID000004885 | CID000004889 | CID000004893 |
| CID000004917 | CID000004932 | CID000004934 | CID000004946 | CID000004976 |
| CID000005002 | CID000005005 | CID000005029 | CID000005038 | CID000005039 |
| CID000005040 | CID000005052 | CID000005070 | CID000005073 | CID000005076 |
| CID000005077 | CID000005095 | CID000005195 | CID000005203 | CID000005210 |
| CID000005376 | CID000005394 | CID000005401 | CID000005408 | CID000005426 |
| CID000005454 | CID000005466 | CID000005478 | CID000005514 | CID000005523 |
| CID000005525 | CID000005530 | CID000005533 | CID000005566 | CID000005584 |
| CID000005625 | CID000005650 | CID000005656 | CID000005719 | CID000005732 |
| CID000005734 | CID000007029 | CID000009904 | CID000019090 | CID000023897 |
| CID000027400 | CID000027661 | CID000028112 | CID000041317 | CID000041781 |
| CID000042615 | CID000047725 | CID000057537 | CID000060787 | CID000060795 |
| CID000062867 | CID000062959 | CID000064147 | CID000065999 | CID000071158 |
| CID000071616 | CID000072054 | CID000077993 | CID000083786 | CID000119607 |
| CID000122316 | CID000125889 | CID000148192 | CID000152945 | CID002761171 |
| CID003081884 | CID004183806 | CID004659568 | CID004659569 | CID005281104 |

(83)  $S_{83}$ : 196 drug compounds having side effect "Eosinophilia"

|              |              |              |              |              |
|--------------|--------------|--------------|--------------|--------------|
| CID000001690 | CID000001775 | CID000001972 | CID000002142 | CID000002160 |
| CID000002170 | CID000002171 | CID000002173 | CID000002274 | CID000002311 |
| CID000002349 | CID000002375 | CID000002477 | CID000002550 | CID000002554 |
| CID000002559 | CID000002575 | CID000002576 | CID000002609 | CID000002610 |
| CID000002617 | CID000002622 | CID000002629 | CID000002631 | CID000002637 |
| CID000002646 | CID000002650 | CID000002655 | CID000002656 | CID000002658 |

CID000002666 CID000002673 CID000002675 CID000002676 CID000002726  
 CID000002727 CID000002762 CID000002764 CID000002771 CID000002786  
 CID000002794 CID000002802 CID000002806 CID000002818 CID000002895  
 CID000002949 CID000002951 CID000002983 CID000002995 CID000003032  
 CID000003040 CID000003121 CID000003125 CID000003152 CID000003158  
 CID000003222 CID000003279 CID000003291 CID000003308 CID000003339  
 CID000003354 CID000003366 CID000003372 CID000003385 CID000003394  
 CID000003403 CID000003406 CID000003419 CID000003440 CID000003454  
 CID000003463 CID000003467 CID000003510 CID000003637 CID000003672  
 CID000003696 CID000003767 CID000003826 CID000003878 CID000003883  
 CID000003899 CID000003929 CID000003937 CID000003948 CID000003956  
 CID000003961 CID000003962 CID000003998 CID000004011 CID000004036  
 CID000004044 CID000004060 CID000004064 CID000004075 CID000004078  
 CID000004112 CID000004138 CID000004163 CID000004173 CID000004200  
 CID000004236 CID000004259 CID000004421 CID000004463 CID000004485  
 CID000004509 CID000004513 CID000004539 CID000004543 CID000004583  
 CID000004607 CID000004614 CID000004645 CID000004679 CID000004691  
 CID000004727 CID000004730 CID000004736 CID000004745 CID000004748  
 CID000004834 CID000004856 CID000004889 CID000004891 CID000004913  
 CID000004915 CID000004917 CID000004976 CID000004993 CID000005002  
 CID000005038 CID000005039 CID000005095 CID000005195 CID000005253  
 CID000005291 CID000005297 CID000005300 CID000005344 CID000005352  
 CID000005412 CID000005426 CID000005452 CID000005454 CID000005472  
 CID000005496 CID000005514 CID000005523 CID000005525 CID000005566  
 CID000005584 CID000005625 CID000005651 CID000005656 CID000005717  
 CID000005718 CID000005719 CID000005731 CID000006476 CID000016362  
 CID000027686 CID000034312 CID000050294 CID000050614 CID000054454  
 CID000054547 CID000054688 CID000060184 CID000060795 CID000062867  
 CID000062924 CID000062959 CID000064147 CID000065999 CID000071158  
 CID000071616 CID000072938 CID000082146 CID000083786 CID000119607  
 CID000125889 CID000147912 CID000150610 CID000477468 CID003002190  
 CID003081884 CID005281007 CID005282044 CID005311297 CID005353980  
 CID005361912 CID005362070 CID005362420 CID005381226 CID006918453  
 CID011954225

(84)  $S_{84}$  : 186 drug compounds having side effect “Urinary tract infection”

CID000000159 CID000000214 CID000000444 CID000000450 CID000000596  
 CID000001125 CID000001690 CID000001935 CID000002083 CID000002182  
 CID000002187 CID000002215 CID000002232 CID000002250 CID000002311  
 CID000002375 CID000002462 CID000002524 CID000002554 CID000002578  
 CID000002585 CID000002662 CID000002678 CID000002769 CID000002771  
 CID000002786 CID000002801 CID000002802 CID000002803 CID000002806  
 CID000002909 CID000003007 CID000003016 CID000003075 CID000003121  
 CID000003152 CID000003154 CID000003157 CID000003222 CID000003340



|              |              |              |              |              |
|--------------|--------------|--------------|--------------|--------------|
| CID000003345 | CID000003367 | CID000003379 | CID000003386 | CID000003394 |
| CID000003403 | CID000003404 | CID000003414 | CID000003446 | CID000003449 |
| CID000003463 | CID000003475 | CID000003510 | CID000003672 | CID000003702 |
| CID000003724 | CID000003746 | CID000003749 | CID000003793 | CID000003877 |
| CID000003878 | CID000003883 | CID000003899 | CID000003902 | CID000003911 |
| CID000003937 | CID000003961 | CID000003962 | CID000004054 | CID000004075 |
| CID000004158 | CID000004173 | CID000004189 | CID000004205 | CID000004212 |
| CID000004236 | CID000004253 | CID000004259 | CID000004428 | CID000004449 |
| CID000004493 | CID000004542 | CID000004547 | CID000004585 | CID000004594 |
| CID000004599 | CID000004635 | CID000004666 | CID000004679 | CID000004691 |
| CID000004739 | CID000004745 | CID000004819 | CID000004885 | CID000004920 |
| CID000005002 | CID000005005 | CID000005035 | CID000005040 | CID000005070 |
| CID000005073 | CID000005076 | CID000005077 | CID000005090 | CID000005095 |
| CID000005152 | CID000005155 | CID000005195 | CID000005210 | CID000005212 |
| CID000005372 | CID000005376 | CID000005394 | CID000005401 | CID000005408 |
| CID000005466 | CID000005508 | CID000005512 | CID000005514 | CID000005523 |
| CID000005525 | CID000005538 | CID000005544 | CID000005596 | CID000005625 |
| CID000005645 | CID000005665 | CID000005731 | CID000005732 | CID000005735 |
| CID000010631 | CID000019090 | CID000027661 | CID000034312 | CID000041317 |
| CID000041744 | CID000047725 | CID000054786 | CID000057469 | CID000057537 |
| CID000059708 | CID000060184 | CID000060198 | CID000060613 | CID000060753 |
| CID000060787 | CID000060795 | CID000060852 | CID000060865 | CID000060953 |
| CID000062819 | CID000064147 | CID000065999 | CID000068740 | CID000071158 |
| CID000071273 | CID000071329 | CID000071616 | CID000072054 | CID000082146 |
| CID000093860 | CID000104741 | CID000104865 | CID000119607 | CID000123620 |
| CID000124087 | CID000125889 | CID000130881 | CID000147912 | CID000148192 |
| CID000151165 | CID000158440 | CID000163742 | CID000216326 | CID000444013 |
| CID003081884 | CID004183806 | CID004659569 | CID005229711 | CID005281104 |
| CID005282044 | CID005282226 | CID005353980 | CID005362070 | CID005487301 |
| CID005493444 |              |              |              |              |

(85) S<sub>85</sub> : 192 drug compounds having side effect “Purpura”

|              |              |              |              |              |
|--------------|--------------|--------------|--------------|--------------|
| CID000000450 | CID000000772 | CID000000942 | CID000001065 | CID000001546 |
| CID000001690 | CID000001935 | CID000001972 | CID000001978 | CID000001986 |
| CID000002022 | CID000002160 | CID000002162 | CID000002170 | CID000002171 |
| CID000002173 | CID000002179 | CID000002244 | CID000002249 | CID000002265 |
| CID000002274 | CID000002315 | CID000002369 | CID000002405 | CID000002462 |
| CID000002520 | CID000002554 | CID000002585 | CID000002676 | CID000002678 |
| CID000002720 | CID000002726 | CID000002732 | CID000002751 | CID000002764 |
| CID000002771 | CID000002801 | CID000002806 | CID000002895 | CID000002909 |
| CID000002949 | CID000002995 | CID000003032 | CID000003075 | CID000003148 |
| CID000003154 | CID000003157 | CID000003158 | CID000003261 | CID000003278 |
| CID000003308 | CID000003342 | CID000003367 | CID000003372 | CID000003386 |
| CID000003387 | CID000003394 | CID000003403 | CID000003404 | CID000003440 |

|              |              |              |              |              |
|--------------|--------------|--------------|--------------|--------------|
| CID000003446 | CID000003449 | CID000003467 | CID000003488 | CID000003519 |
| CID000003637 | CID000003639 | CID000003647 | CID000003672 | CID000003696 |
| CID000003702 | CID000003715 | CID000003741 | CID000003825 | CID000003826 |
| CID000003869 | CID000003928 | CID000003948 | CID000003961 | CID000003962 |
| CID000004011 | CID000004036 | CID000004044 | CID000004064 | CID000004121 |
| CID000004158 | CID000004160 | CID000004170 | CID000004171 | CID000004411 |
| CID000004440 | CID000004485 | CID000004513 | CID000004542 | CID000004543 |
| CID000004583 | CID000004594 | CID000004609 | CID000004614 | CID000004638 |
| CID000004691 | CID000004724 | CID000004727 | CID000004740 | CID000004745 |
| CID000004748 | CID000004828 | CID000004856 | CID000004870 | CID000004885 |
| CID000004889 | CID000004915 | CID000004917 | CID000004920 | CID000004927 |
| CID000004932 | CID000004946 | CID000004976 | CID000005038 | CID000005040 |
| CID000005052 | CID000005070 | CID000005073 | CID000005077 | CID000005095 |
| CID000005203 | CID000005215 | CID000005253 | CID000005291 | CID000005344 |
| CID000005352 | CID000005372 | CID000005376 | CID000005394 | CID000005408 |
| CID000005412 | CID000005426 | CID000005472 | CID000005478 | CID000005487 |
| CID000005508 | CID000005514 | CID000005523 | CID000005544 | CID000005566 |
| CID000005584 | CID000005625 | CID000005656 | CID000005665 | CID000005718 |
| CID000005719 | CID000005732 | CID000005878 | CID000009904 | CID000010631 |
| CID000016362 | CID000027661 | CID000027686 | CID000031378 | CID000034312 |
| CID000039042 | CID000041317 | CID000042615 | CID000054454 | CID000054547 |
| CID000057469 | CID000057537 | CID000060184 | CID000060613 | CID000060953 |
| CID000062867 | CID000065999 | CID000071273 | CID000071616 | CID000077992 |
| CID000077993 | CID000083786 | CID000122316 | CID000125889 | CID000130881 |
| CID000147912 | CID000148192 | CID000163742 | CID002761171 | CID004183806 |
| CID004659568 | CID005353980 | CID005381226 | CID005473385 | CID005493381 |
| CID006323497 | CID006398970 |              |              |              |

(86)  $S_{86}$ : 184 drug compounds having side effect "Increased sweating"

|              |              |              |              |              |
|--------------|--------------|--------------|--------------|--------------|
| CID000000158 | CID000000214 | CID000000444 | CID000000450 | CID000000596 |
| CID000000598 | CID000000738 | CID000000807 | CID000000853 | CID000000942 |
| CID000001546 | CID000001935 | CID000002022 | CID000002083 | CID000002118 |
| CID000002130 | CID000002160 | CID000002162 | CID000002215 | CID000002274 |
| CID000002284 | CID000002349 | CID000002405 | CID000002431 | CID000002443 |
| CID000002462 | CID000002474 | CID000002520 | CID000002541 | CID000002554 |
| CID000002585 | CID000002656 | CID000002662 | CID000002678 | CID000002751 |
| CID000002764 | CID000002771 | CID000002801 | CID000002909 | CID000002958 |
| CID000003003 | CID000003015 | CID000003032 | CID000003066 | CID000003075 |
| CID000003108 | CID000003114 | CID000003148 | CID000003152 | CID000003157 |
| CID000003203 | CID000003222 | CID000003310 | CID000003324 | CID000003342 |
| CID000003345 | CID000003355 | CID000003365 | CID000003367 | CID000003372 |
| CID000003373 | CID000003386 | CID000003404 | CID000003414 | CID000003419 |
| CID000003446 | CID000003476 | CID000003559 | CID000003640 | CID000003648 |
| CID000003676 | CID000003724 | CID000003734 | CID000003736 | CID000003750 |

|              |              |              |              |              |
|--------------|--------------|--------------|--------------|--------------|
| CID000003793 | CID000003869 | CID000003899 | CID000003902 | CID000003911 |
| CID000003929 | CID000003937 | CID000003948 | CID000004062 | CID000004086 |
| CID000004091 | CID000004140 | CID000004159 | CID000004171 | CID000004178 |
| CID000004212 | CID000004253 | CID000004409 | CID000004419 | CID000004428 |
| CID000004473 | CID000004485 | CID000004493 | CID000004497 | CID000004510 |
| CID000004542 | CID000004583 | CID000004594 | CID000004609 | CID000004614 |
| CID000004666 | CID000004691 | CID000004736 | CID000004739 | CID000004812 |
| CID000004889 | CID000004893 | CID000004894 | CID000004900 | CID000004915 |
| CID000004920 | CID000004932 | CID000004943 | CID000004991 | CID000005005 |
| CID000005038 | CID000005064 | CID000005071 | CID000005073 | CID000005077 |
| CID000005095 | CID000005195 | CID000005203 | CID000005352 | CID000005394 |
| CID000005452 | CID000005454 | CID000005514 | CID000005523 | CID000005538 |
| CID000005544 | CID000005596 | CID000005625 | CID000005718 | CID000005726 |
| CID000005732 | CID000007029 | CID000008612 | CID000010631 | CID000014888 |
| CID000027661 | CID000031378 | CID000034312 | CID000039860 | CID000041317 |
| CID000042615 | CID000054547 | CID000057537 | CID000059768 | CID000060198 |
| CID000060612 | CID000060754 | CID000060787 | CID000060953 | CID000062959 |
| CID000064147 | CID000065999 | CID000068740 | CID000071273 | CID000077992 |
| CID000104865 | CID000119607 | CID000123606 | CID000147912 | CID000151165 |
| CID000158440 | CID000166548 | CID000216326 | CID000222786 | CID000443871 |
| CID000444013 | CID003002190 | CID004183806 | CID004659568 | CID004659569 |
| CID005229711 | CID005487301 | CID006436173 | CID011947681 |              |

(87)  $S_{87}$ : 181 drug compounds having side effect "Dysuria"

|              |              |              |              |              |
|--------------|--------------|--------------|--------------|--------------|
| CID000000444 | CID000001046 | CID000001690 | CID000001775 | CID000001935 |
| CID000001972 | CID000001978 | CID000002162 | CID000002182 | CID000002250 |
| CID000002269 | CID000002284 | CID000002344 | CID000002369 | CID000002375 |
| CID000002462 | CID000002477 | CID000002478 | CID000002609 | CID000002654 |
| CID000002658 | CID000002662 | CID000002678 | CID000002751 | CID000002764 |
| CID000002771 | CID000002786 | CID000002801 | CID000002802 | CID000002907 |
| CID000002909 | CID000002958 | CID000002973 | CID000003032 | CID000003059 |
| CID000003114 | CID000003121 | CID000003125 | CID000003148 | CID000003151 |
| CID000003152 | CID000003157 | CID000003308 | CID000003325 | CID000003333 |
| CID000003339 | CID000003342 | CID000003345 | CID000003355 | CID000003367 |
| CID000003386 | CID000003394 | CID000003404 | CID000003414 | CID000003417 |
| CID000003446 | CID000003478 | CID000003510 | CID000003648 | CID000003657 |
| CID000003672 | CID000003690 | CID000003702 | CID000003706 | CID000003736 |
| CID000003746 | CID000003759 | CID000003784 | CID000003826 | CID000003869 |
| CID000003878 | CID000003883 | CID000003899 | CID000003911 | CID000003937 |
| CID000003948 | CID000004044 | CID000004054 | CID000004075 | CID000004101 |
| CID000004112 | CID000004163 | CID000004173 | CID000004195 | CID000004205 |
| CID000004253 | CID000004259 | CID000004409 | CID000004449 | CID000004485 |
| CID000004542 | CID000004583 | CID000004585 | CID000004594 | CID000004595 |
| CID000004609 | CID000004614 | CID000004635 | CID000004679 | CID000004691 |

|              |              |              |              |              |
|--------------|--------------|--------------|--------------|--------------|
| CID000004745 | CID000004819 | CID000004856 | CID000004885 | CID000004889 |
| CID000004920 | CID000004932 | CID000005002 | CID000005005 | CID000005029 |
| CID000005040 | CID000005052 | CID000005070 | CID000005073 | CID000005076 |
| CID000005077 | CID000005078 | CID000005090 | CID000005095 | CID000005155 |
| CID000005195 | CID000005203 | CID000005352 | CID000005358 | CID000005372 |
| CID000005379 | CID000005394 | CID000005401 | CID000005408 | CID000005426 |
| CID000005453 | CID000005466 | CID000005508 | CID000005512 | CID000005514 |
| CID000005523 | CID000005538 | CID000005596 | CID000005645 | CID000005656 |
| CID000005718 | CID000005719 | CID000005732 | CID000005734 | CID000005735 |
| CID000005978 | CID000007029 | CID000010631 | CID000027661 | CID000027686 |
| CID000034312 | CID000040976 | CID000041317 | CID000041744 | CID000054547 |
| CID000059768 | CID000060613 | CID000060795 | CID000060953 | CID000062959 |
| CID000064147 | CID000065999 | CID000071273 | CID000071616 | CID000082146 |
| CID000083786 | CID000104865 | CID000119607 | CID000122316 | CID000125889 |
| CID000147912 | CID000150610 | CID000151165 | CID000158440 | CID000216326 |
| CID000444013 | CID003081884 | CID004183806 | CID004659568 | CID004659569 |
| CID006436173 |              |              |              |              |

(88)  $S_{88}$  : 184 drug compounds having side effect "Bronchitis"

|              |              |              |              |              |
|--------------|--------------|--------------|--------------|--------------|
| CID000000085 | CID000000214 | CID000000444 | CID000000450 | CID000000807 |
| CID000000937 | CID000000942 | CID000001690 | CID000001775 | CID000001935 |
| CID000001971 | CID000002092 | CID000002182 | CID000002187 | CID000002250 |
| CID000002267 | CID000002269 | CID000002311 | CID000002369 | CID000002375 |
| CID000002405 | CID000002435 | CID000002462 | CID000002487 | CID000002541 |
| CID000002554 | CID000002585 | CID000002662 | CID000002676 | CID000002678 |
| CID000002713 | CID000002751 | CID000002771 | CID000002801 | CID000002802 |
| CID000002806 | CID000002818 | CID000002909 | CID000003032 | CID000003066 |
| CID000003075 | CID000003121 | CID000003152 | CID000003154 | CID000003157 |
| CID000003222 | CID000003285 | CID000003308 | CID000003325 | CID000003333 |
| CID000003339 | CID000003345 | CID000003367 | CID000003379 | CID000003386 |
| CID000003394 | CID000003403 | CID000003404 | CID000003410 | CID000003446 |
| CID000003449 | CID000003475 | CID000003702 | CID000003724 | CID000003746 |
| CID000003793 | CID000003877 | CID000003878 | CID000003883 | CID000003899 |
| CID000003911 | CID000003937 | CID000003961 | CID000004054 | CID000004075 |
| CID000004158 | CID000004173 | CID000004201 | CID000004205 | CID000004236 |
| CID000004428 | CID000004440 | CID000004449 | CID000004542 | CID000004547 |
| CID000004583 | CID000004594 | CID000004603 | CID000004634 | CID000004635 |
| CID000004679 | CID000004691 | CID000004739 | CID000004745 | CID000004819 |
| CID000004885 | CID000004920 | CID000005035 | CID000005038 | CID000005040 |
| CID000005070 | CID000005076 | CID000005077 | CID000005090 | CID000005095 |
| CID000005152 | CID000005155 | CID000005195 | CID000005203 | CID000005210 |
| CID000005212 | CID000005245 | CID000005358 | CID000005372 | CID000005376 |
| CID000005394 | CID000005401 | CID000005426 | CID000005466 | CID000005487 |
| CID000005512 | CID000005514 | CID000005523 | CID000005525 | CID000005544 |

|              |              |              |              |              |
|--------------|--------------|--------------|--------------|--------------|
| CID000005625 | CID000005636 | CID000005645 | CID000005650 | CID000005656 |
| CID000005719 | CID000005721 | CID000005731 | CID000005732 | CID000005735 |
| CID000010631 | CID000027661 | CID000031477 | CID000034312 | CID000039042 |
| CID000047725 | CID000050294 | CID000054454 | CID000054547 | CID000054786 |
| CID000057469 | CID000059708 | CID000060184 | CID000060198 | CID000060613 |
| CID000060787 | CID000060852 | CID000060953 | CID000062819 | CID000062924 |
| CID000064147 | CID000065027 | CID000065999 | CID000071158 | CID000072054 |
| CID000077993 | CID000082146 | CID000104865 | CID000115237 | CID000119607 |
| CID000123606 | CID000123620 | CID000124087 | CID000125889 | CID000130881 |
| CID000170361 | CID000176168 | CID000216326 | CID000443871 | CID003081884 |
| CID004183806 | CID004659568 | CID004659569 | CID005281104 | CID005282226 |
| CID005311027 | CID005493381 | CID005493444 | CID006447131 |              |

(89)  $S_{89}$ : 188 drug compounds having side effect "Dermatitis"

|              |              |              |              |              |
|--------------|--------------|--------------|--------------|--------------|
| CID000000143 | CID000000298 | CID000000444 | CID000000450 | CID000000727 |
| CID000001065 | CID000001690 | CID000001775 | CID000001935 | CID000002099 |
| CID000002118 | CID000002130 | CID000002156 | CID000002162 | CID000002171 |
| CID000002216 | CID000002266 | CID000002269 | CID000002274 | CID000002311 |
| CID000002369 | CID000002405 | CID000002462 | CID000002522 | CID000002578 |
| CID000002585 | CID000002662 | CID000002678 | CID000002751 | CID000002764 |
| CID000002771 | CID000002786 | CID000002800 | CID000002801 | CID000002806 |
| CID000002818 | CID000002907 | CID000002909 | CID000003000 | CID000003003 |
| CID000003032 | CID000003075 | CID000003108 | CID000003143 | CID000003152 |
| CID000003157 | CID000003203 | CID000003219 | CID000003279 | CID000003310 |
| CID000003339 | CID000003355 | CID000003375 | CID000003381 | CID000003382 |
| CID000003385 | CID000003403 | CID000003419 | CID000003440 | CID000003454 |
| CID000003463 | CID000003475 | CID000003510 | CID000003518 | CID000003519 |
| CID000003553 | CID000003598 | CID000003657 | CID000003661 | CID000003676 |
| CID000003690 | CID000003749 | CID000003823 | CID000003826 | CID000003878 |
| CID000003911 | CID000003928 | CID000003929 | CID000003961 | CID000003964 |
| CID000004053 | CID000004054 | CID000004060 | CID000004064 | CID000004091 |
| CID000004112 | CID000004158 | CID000004170 | CID000004173 | CID000004201 |
| CID000004205 | CID000004264 | CID000004440 | CID000004451 | CID000004485 |
| CID000004510 | CID000004539 | CID000004542 | CID000004583 | CID000004594 |
| CID000004603 | CID000004679 | CID000004736 | CID000004745 | CID000004819 |
| CID000004845 | CID000004885 | CID000004889 | CID000004911 | CID000004915 |
| CID000004927 | CID000004932 | CID000005005 | CID000005040 | CID000005064 |
| CID000005073 | CID000005077 | CID000005095 | CID000005203 | CID000005210 |
| CID000005212 | CID000005291 | CID000005352 | CID000005372 | CID000005379 |
| CID000005381 | CID000005394 | CID000005408 | CID000005452 | CID000005453 |
| CID000005514 | CID000005515 | CID000005516 | CID000005523 | CID000005538 |
| CID000005544 | CID000005556 | CID000005625 | CID000005656 | CID000005672 |
| CID000005718 | CID000005732 | CID000006691 | CID000012536 | CID000014888 |
| CID000031477 | CID000032797 | CID000041317 | CID000048175 | CID000052421 |

|              |              |              |              |              |
|--------------|--------------|--------------|--------------|--------------|
| CID000054547 | CID000057469 | CID000060164 | CID000060184 | CID000060198 |
| CID000060787 | CID000060852 | CID000060953 | CID000062816 | CID000062867 |
| CID000062924 | CID000062959 | CID000064147 | CID000065999 | CID000068740 |
| CID000068844 | CID000072938 | CID000082146 | CID000083786 | CID000104865 |
| CID000119182 | CID000119607 | CID000123606 | CID000123620 | CID000123631 |
| CID000125889 | CID000130881 | CID000147912 | CID000150610 | CID000170361 |
| CID000213039 | CID003062316 | CID003081884 | CID004183806 | CID004630253 |
| CID004659568 | CID005311297 | CID006447131 |              |              |

(90)  $S_{90}$ : 181 drug compounds having side effect "Angina pectoris"

|              |              |              |              |              |
|--------------|--------------|--------------|--------------|--------------|
| CID000000159 | CID000000453 | CID000000681 | CID000000750 | CID000000807 |
| CID000000838 | CID000000853 | CID000000861 | CID000000937 | CID000001065 |
| CID000001690 | CID000001935 | CID000002083 | CID000002092 | CID000002182 |
| CID000002187 | CID000002215 | CID000002232 | CID000002311 | CID000002369 |
| CID000002375 | CID000002541 | CID000002550 | CID000002585 | CID000002662 |
| CID000002676 | CID000002751 | CID000002764 | CID000002771 | CID000002818 |
| CID000002958 | CID000003007 | CID000003019 | CID000003032 | CID000003066 |
| CID000003108 | CID000003143 | CID000003152 | CID000003154 | CID000003157 |
| CID000003222 | CID000003333 | CID000003339 | CID000003340 | CID000003345 |
| CID000003355 | CID000003367 | CID000003385 | CID000003386 | CID000003394 |
| CID000003404 | CID000003410 | CID000003419 | CID000003446 | CID000003475 |
| CID000003510 | CID000003518 | CID000003637 | CID000003639 | CID000003648 |
| CID000003702 | CID000003706 | CID000003724 | CID000003734 | CID000003741 |
| CID000003749 | CID000003750 | CID000003779 | CID000003869 | CID000003878 |
| CID000003883 | CID000003890 | CID000003899 | CID000003902 | CID000003911 |
| CID000003937 | CID000003948 | CID000003961 | CID000004054 | CID000004075 |
| CID000004138 | CID000004158 | CID000004178 | CID000004197 | CID000004205 |
| CID000004259 | CID000004409 | CID000004428 | CID000004440 | CID000004449 |
| CID000004493 | CID000004547 | CID000004583 | CID000004594 | CID000004595 |
| CID000004603 | CID000004679 | CID000004691 | CID000004739 | CID000004740 |
| CID000004745 | CID000004819 | CID000004829 | CID000004856 | CID000004885 |
| CID000004893 | CID000004915 | CID000004920 | CID000004932 | CID000005002 |
| CID000005005 | CID000005029 | CID000005038 | CID000005039 | CID000005052 |
| CID000005064 | CID000005070 | CID000005073 | CID000005077 | CID000005078 |
| CID000005090 | CID000005095 | CID000005195 | CID000005210 | CID000005212 |
| CID000005245 | CID000005358 | CID000005372 | CID000005376 | CID000005401 |
| CID000005408 | CID000005426 | CID000005466 | CID000005478 | CID000005487 |
| CID000005514 | CID000005516 | CID000005523 | CID000005525 | CID000005596 |
| CID000005645 | CID000005656 | CID000005719 | CID000005731 | CID000005732 |
| CID000006691 | CID000013342 | CID000031477 | CID000036811 | CID000059768 |
| CID000060184 | CID000060198 | CID000060787 | CID000060795 | CID000060953 |
| CID000062816 | CID000062959 | CID000065999 | CID000071158 | CID000071329 |
| CID000077993 | CID000082146 | CID000093860 | CID000104865 | CID000110634 |
| CID000110635 | CID000119607 | CID000122316 | CID000123606 | CID000125889 |

|              |              |              |              |              |
|--------------|--------------|--------------|--------------|--------------|
| CID000150310 | CID000158440 | CID000170361 | CID000197712 | CID000216326 |
| CID003062316 | CID003081884 | CID004659568 | CID004659569 | CID005282226 |
| CID005487301 |              |              |              |              |

(91)  $S_{91}$ : 180 drug compounds having side effect "Asthma"

|              |              |              |              |              |
|--------------|--------------|--------------|--------------|--------------|
| CID000000444 | CID000000450 | CID000000772 | CID000000807 | CID000001065 |
| CID000001775 | CID000001935 | CID000001972 | CID000002140 | CID000002171 |
| CID000002173 | CID000002182 | CID000002216 | CID000002244 | CID000002249 |
| CID000002250 | CID000002266 | CID000002267 | CID000002269 | CID000002311 |
| CID000002349 | CID000002370 | CID000002375 | CID000002405 | CID000002478 |
| CID000002576 | CID000002585 | CID000002609 | CID000002673 | CID000002678 |
| CID000002726 | CID000002764 | CID000002769 | CID000002771 | CID000002802 |
| CID000002973 | CID000003015 | CID000003016 | CID000003032 | CID000003152 |
| CID000003158 | CID000003203 | CID000003222 | CID000003261 | CID000003285 |
| CID000003305 | CID000003308 | CID000003339 | CID000003345 | CID000003372 |
| CID000003386 | CID000003394 | CID000003404 | CID000003417 | CID000003419 |
| CID000003446 | CID000003475 | CID000003518 | CID000003648 | CID000003672 |
| CID000003715 | CID000003724 | CID000003734 | CID000003736 | CID000003737 |
| CID000003741 | CID000003742 | CID000003826 | CID000003878 | CID000003883 |
| CID000003890 | CID000003899 | CID000003911 | CID000003937 | CID000004044 |
| CID000004054 | CID000004075 | CID000004078 | CID000004158 | CID000004168 |
| CID000004173 | CID000004200 | CID000004205 | CID000004236 | CID000004253 |
| CID000004259 | CID000004409 | CID000004419 | CID000004440 | CID000004449 |
| CID000004542 | CID000004583 | CID000004585 | CID000004594 | CID000004599 |
| CID000004603 | CID000004614 | CID000004634 | CID000004679 | CID000004691 |
| CID000004727 | CID000004739 | CID000004745 | CID000004748 | CID000004856 |
| CID000004885 | CID000004917 | CID000004920 | CID000004927 | CID000004991 |
| CID000005002 | CID000005005 | CID000005029 | CID000005040 | CID000005064 |
| CID000005070 | CID000005073 | CID000005076 | CID000005090 | CID000005095 |
| CID000005195 | CID000005212 | CID000005253 | CID000005358 | CID000005372 |
| CID000005379 | CID000005401 | CID000005408 | CID000005452 | CID000005453 |
| CID000005466 | CID000005487 | CID000005496 | CID000005514 | CID000005523 |
| CID000005538 | CID000005566 | CID000005645 | CID000005656 | CID000005719 |
| CID000005735 | CID000010631 | CID000012536 | CID000025419 | CID000027661 |
| CID000034312 | CID000040976 | CID000042113 | CID000054547 | CID000054688 |
| CID000059708 | CID000060184 | CID000060613 | CID000060787 | CID000060795 |
| CID000060953 | CID000062867 | CID000062959 | CID000065999 | CID000068740 |
| CID000071158 | CID000077993 | CID000083786 | CID000104865 | CID000122316 |
| CID000125889 | CID000150610 | CID000170361 | CID000216326 | CID000444013 |
| CID003062316 | CID003081884 | CID004659569 | CID005229711 | CID005281104 |
| CID005487301 | CID006398970 | CID006435110 | CID006447131 | CID009571074 |

(92)  $S_{92}$ : 178 drug compounds having side effect "Urinary frequency"

|              |              |              |              |              |
|--------------|--------------|--------------|--------------|--------------|
| CID000000214 | CID000000444 | CID000000450 | CID000001690 | CID000001935 |
|--------------|--------------|--------------|--------------|--------------|

|              |              |              |              |              |
|--------------|--------------|--------------|--------------|--------------|
| CID000002099 | CID000002118 | CID000002160 | CID000002162 | CID000002170 |
| CID000002182 | CID000002250 | CID000002267 | CID000002269 | CID000002284 |
| CID000002311 | CID000002375 | CID000002443 | CID000002462 | CID000002477 |
| CID000002520 | CID000002550 | CID000002554 | CID000002564 | CID000002585 |
| CID000002662 | CID000002678 | CID000002725 | CID000002751 | CID000002764 |
| CID000002769 | CID000002771 | CID000002781 | CID000002800 | CID000002801 |
| CID000002802 | CID000002812 | CID000002818 | CID000002895 | CID000002907 |
| CID000002909 | CID000002913 | CID000002951 | CID000002995 | CID000003015 |
| CID000003032 | CID000003066 | CID000003075 | CID000003100 | CID000003114 |
| CID000003121 | CID000003151 | CID000003152 | CID000003157 | CID000003285 |
| CID000003308 | CID000003325 | CID000003333 | CID000003339 | CID000003345 |
| CID000003348 | CID000003386 | CID000003404 | CID000003419 | CID000003440 |
| CID000003446 | CID000003449 | CID000003454 | CID000003476 | CID000003519 |
| CID000003648 | CID000003690 | CID000003696 | CID000003702 | CID000003715 |
| CID000003746 | CID000003759 | CID000003826 | CID000003878 | CID000003883 |
| CID000003899 | CID000003902 | CID000003911 | CID000003961 | CID000004011 |
| CID000004075 | CID000004168 | CID000004173 | CID000004195 | CID000004205 |
| CID000004236 | CID000004259 | CID000004449 | CID000004473 | CID000004485 |
| CID000004542 | CID000004543 | CID000004583 | CID000004585 | CID000004594 |
| CID000004609 | CID000004679 | CID000004691 | CID000004745 | CID000004819 |
| CID000004828 | CID000004885 | CID000004893 | CID000004911 | CID000004915 |
| CID000004920 | CID000004932 | CID000004976 | CID000004991 | CID000005002 |
| CID000005029 | CID000005040 | CID000005071 | CID000005073 | CID000005076 |
| CID000005077 | CID000005078 | CID000005095 | CID000005195 | CID000005203 |
| CID000005210 | CID000005212 | CID000005291 | CID000005358 | CID000005372 |
| CID000005394 | CID000005401 | CID000005426 | CID000005466 | CID000005487 |
| CID000005514 | CID000005523 | CID000005530 | CID000005533 | CID000005538 |
| CID000005584 | CID000005645 | CID000005656 | CID000005718 | CID000005719 |
| CID000005726 | CID000005731 | CID000005732 | CID000005734 | CID000005735 |
| CID000010631 | CID000019090 | CID000027661 | CID000027686 | CID000034312 |
| CID000039860 | CID000041744 | CID000054547 | CID000060184 | CID000060795 |
| CID000062819 | CID000062959 | CID000064147 | CID000065999 | CID000071158 |
| CID000077992 | CID000077993 | CID000104865 | CID000119607 | CID000125889 |
| CID000147912 | CID000148192 | CID000158440 | CID003062316 | CID003081884 |
| CID004659569 | CID006436173 | CID009571074 |              |              |

(93)  $S_{93}$ : 176 drug compounds having side effect "Upper respiratory tract infection"

|              |              |              |              |              |
|--------------|--------------|--------------|--------------|--------------|
| CID000000214 | CID000000444 | CID000000450 | CID000000807 | CID000001125 |
| CID000001134 | CID000001935 | CID000002083 | CID000002092 | CID000002118 |
| CID000002308 | CID000002369 | CID000002405 | CID000002462 | CID000002487 |
| CID000002520 | CID000002541 | CID000002585 | CID000002662 | CID000002678 |
| CID000002713 | CID000002769 | CID000002771 | CID000002786 | CID000002802 |
| CID000002806 | CID000002895 | CID000002909 | CID000003066 | CID000003075 |
| CID000003154 | CID000003157 | CID000003222 | CID000003241 | CID000003285 |



CID000003333 CID000003342 CID000003345 CID000003348 CID000003367  
CID000003372 CID000003379 CID000003381 CID000003386 CID000003404  
CID000003410 CID000003419 CID000003446 CID000003449 CID000003454  
CID000003475 CID000003706 CID000003746 CID000003750 CID000003793  
CID000003890 CID000003899 CID000003929 CID000003937 CID000003961  
CID000004054 CID000004075 CID000004091 CID000004112 CID000004158  
CID000004173 CID000004189 CID000004212 CID000004428 CID000004485  
CID000004493 CID000004542 CID000004547 CID000004583 CID000004594  
CID000004599 CID000004603 CID000004609 CID000004614 CID000004634  
CID000004666 CID000004679 CID000004691 CID000004724 CID000004739  
CID000004829 CID000004885 CID000004889 CID000004920 CID000004932  
CID000005002 CID000005038 CID000005040 CID000005073 CID000005077  
CID000005078 CID000005090 CID000005095 CID000005152 CID000005203  
CID000005212 CID000005245 CID000005253 CID000005291 CID000005394  
CID000005402 CID000005426 CID000005478 CID000005496 CID000005514  
CID000005523 CID000005525 CID000005544 CID000005625 CID000005645  
CID000005647 CID000005650 CID000005656 CID000005665 CID000005732  
CID000010631 CID000012536 CID000014888 CID000027661 CID000027991  
CID000032797 CID000034312 CID000040976 CID000042615 CID000047725  
CID000050294 CID000054454 CID000057469 CID000057537 CID000059708  
CID000060184 CID000060198 CID000060787 CID000060795 CID000060852  
CID000060877 CID000060953 CID000062867 CID000062924 CID000062959  
CID000064147 CID000065999 CID000068740 CID000077999 CID000093860  
CID000104865 CID000115237 CID000119607 CID000123620 CID000124087  
CID000130881 CID000147912 CID000150311 CID000150610 CID000151165  
CID000158440 CID000197712 CID000216326 CID000443871 CID000444033  
CID003062316 CID004183806 CID004659569 CID005229711 CID005311027  
CID005311297 CID005481350 CID005487301 CID005493444 CID006436173  
CID006447131

(94)  $S_{94}$ : 182 drug compounds having side effect "Ataxia"

CID000000444 CID000000767 CID000001065 CID000001690 CID000001775  
CID000001935 CID000001986 CID000002022 CID000002083 CID000002118  
CID000002123 CID000002130 CID000002156 CID000002160 CID000002162  
CID000002170 CID000002249 CID000002284 CID000002369 CID000002441  
CID000002443 CID000002477 CID000002487 CID000002550 CID000002554  
CID000002576 CID000002578 CID000002656 CID000002662 CID000002678  
CID000002708 CID000002712 CID000002751 CID000002764 CID000002771  
CID000002801 CID000002802 CID000002818 CID000002895 CID000002905  
CID000002958 CID000002978 CID000002995 CID000003016 CID000003121  
CID000003143 CID000003148 CID000003152 CID000003157 CID000003158  
CID000003203 CID000003222 CID000003261 CID000003291 CID000003292  
CID000003355 CID000003366 CID000003373 CID000003385 CID000003386  
CID000003393 CID000003394 CID000003404 CID000003414 CID000003446

|              |              |              |              |              |
|--------------|--------------|--------------|--------------|--------------|
| CID000003449 | CID000003454 | CID000003648 | CID000003652 | CID000003661 |
| CID000003675 | CID000003696 | CID000003702 | CID000003759 | CID000003878 |
| CID000003914 | CID000003937 | CID000003948 | CID000003950 | CID000003958 |
| CID000003961 | CID000004011 | CID000004046 | CID000004054 | CID000004060 |
| CID000004064 | CID000004078 | CID000004112 | CID000004163 | CID000004173 |
| CID000004178 | CID000004192 | CID000004205 | CID000004236 | CID000004253 |
| CID000004449 | CID000004485 | CID000004506 | CID000004539 | CID000004543 |
| CID000004583 | CID000004585 | CID000004609 | CID000004616 | CID000004666 |
| CID000004691 | CID000004737 | CID000004739 | CID000004745 | CID000004748 |
| CID000004885 | CID000004909 | CID000004915 | CID000004927 | CID000004932 |
| CID000004976 | CID000005002 | CID000005070 | CID000005071 | CID000005073 |
| CID000005076 | CID000005077 | CID000005078 | CID000005095 | CID000005193 |
| CID000005195 | CID000005203 | CID000005212 | CID000005215 | CID000005267 |
| CID000005344 | CID000005379 | CID000005391 | CID000005394 | CID000005426 |
| CID000005466 | CID000005479 | CID000005514 | CID000005516 | CID000005523 |
| CID000005530 | CID000005533 | CID000005556 | CID000005584 | CID000005647 |
| CID000005656 | CID000005665 | CID000005718 | CID000005719 | CID000005731 |
| CID000005732 | CID000005734 | CID000005735 | CID000005978 | CID000006058 |
| CID000006476 | CID000010631 | CID000028112 | CID000034312 | CID000039860 |
| CID000057537 | CID000059708 | CID000060613 | CID000060754 | CID000060787 |
| CID000060795 | CID000060953 | CID000062959 | CID000064147 | CID000071616 |
| CID000077992 | CID000077993 | CID000082146 | CID000093860 | CID000096312 |
| CID000122316 | CID000125889 | CID000147912 | CID003081884 | CID004659568 |
| CID005353980 | CID005381226 |              |              |              |

(95)  $S_{95}$  : 177 drug compounds having side effect “Dysphagia”

|              |              |              |              |              |
|--------------|--------------|--------------|--------------|--------------|
| CID000000206 | CID000000444 | CID000000596 | CID000000853 | CID000000937 |
| CID000001003 | CID000001690 | CID000001775 | CID000001935 | CID000001972 |
| CID000002118 | CID000002130 | CID000002162 | CID000002179 | CID000002182 |
| CID000002250 | CID000002284 | CID000002344 | CID000002369 | CID000002375 |
| CID000002443 | CID000002487 | CID000002578 | CID000002662 | CID000002726 |
| CID000002764 | CID000002771 | CID000002801 | CID000002818 | CID000002909 |
| CID000002951 | CID000002958 | CID000002983 | CID000003016 | CID000003066 |
| CID000003108 | CID000003121 | CID000003143 | CID000003152 | CID000003222 |
| CID000003278 | CID000003310 | CID000003345 | CID000003367 | CID000003372 |
| CID000003386 | CID000003404 | CID000003414 | CID000003419 | CID000003446 |
| CID000003449 | CID000003454 | CID000003519 | CID000003559 | CID000003648 |
| CID000003661 | CID000003702 | CID000003793 | CID000003878 | CID000003883 |
| CID000003911 | CID000003948 | CID000003964 | CID000004011 | CID000004054 |
| CID000004075 | CID000004178 | CID000004200 | CID000004253 | CID000004259 |
| CID000004409 | CID000004449 | CID000004485 | CID000004539 | CID000004583 |
| CID000004585 | CID000004594 | CID000004609 | CID000004634 | CID000004635 |
| CID000004645 | CID000004679 | CID000004691 | CID000004739 | CID000004745 |
| CID000004748 | CID000004819 | CID000004885 | CID000004893 | CID000004915 |

|              |              |              |              |              |
|--------------|--------------|--------------|--------------|--------------|
| CID000004917 | CID000004920 | CID000004932 | CID000005002 | CID000005029 |
| CID000005038 | CID000005040 | CID000005070 | CID000005071 | CID000005073 |
| CID000005076 | CID000005077 | CID000005078 | CID000005095 | CID000005195 |
| CID000005203 | CID000005212 | CID000005245 | CID000005358 | CID000005372 |
| CID000005379 | CID000005394 | CID000005412 | CID000005426 | CID000005454 |
| CID000005466 | CID000005487 | CID000005514 | CID000005523 | CID000005538 |
| CID000005566 | CID000005625 | CID000005645 | CID000005656 | CID000005672 |
| CID000005718 | CID000005719 | CID000005726 | CID000005731 | CID000005732 |
| CID000005734 | CID000005735 | CID000010631 | CID000023897 | CID000025419 |
| CID000027686 | CID000030623 | CID000034312 | CID000060613 | CID000060714 |
| CID000060787 | CID000060795 | CID000060843 | CID000060953 | CID000062816 |
| CID000062959 | CID000064147 | CID000068740 | CID000071158 | CID000071616 |
| CID000072938 | CID000077992 | CID000077993 | CID000093860 | CID000110634 |
| CID000110635 | CID000115237 | CID000119607 | CID000122316 | CID000125889 |
| CID000147912 | CID000150610 | CID000151165 | CID000170361 | CID000176870 |
| CID000216239 | CID000216326 | CID000444013 | CID003062316 | CID003081884 |
| CID004183806 | CID004479097 | CID004659568 | CID004659569 | CID005281104 |
| CID006436173 | CID006918453 |              |              |              |

(96)  $S_{96}$ : 179 drug compounds having side effect "Convulsions"

|              |              |              |              |              |
|--------------|--------------|--------------|--------------|--------------|
| CID000000191 | CID000000206 | CID000000401 | CID000000453 | CID000000564 |
| CID000000596 | CID000000750 | CID000000807 | CID000001065 | CID000001125 |
| CID000001690 | CID000001935 | CID000001972 | CID000001986 | CID000002022 |
| CID000002171 | CID000002269 | CID000002284 | CID000002349 | CID000002474 |
| CID000002476 | CID000002487 | CID000002554 | CID000002564 | CID000002585 |
| CID000002631 | CID000002678 | CID000002725 | CID000002762 | CID000002764 |
| CID000002771 | CID000002781 | CID000002801 | CID000002818 | CID000002895 |
| CID000002909 | CID000002913 | CID000002949 | CID000002958 | CID000003003 |
| CID000003007 | CID000003019 | CID000003032 | CID000003075 | CID000003100 |
| CID000003152 | CID000003156 | CID000003157 | CID000003203 | CID000003255 |
| CID000003278 | CID000003308 | CID000003325 | CID000003345 | CID000003355 |
| CID000003365 | CID000003366 | CID000003373 | CID000003386 | CID000003394 |
| CID000003446 | CID000003449 | CID000003463 | CID000003467 | CID000003640 |
| CID000003648 | CID000003652 | CID000003657 | CID000003658 | CID000003672 |
| CID000003675 | CID000003676 | CID000003696 | CID000003715 | CID000003724 |
| CID000003734 | CID000003736 | CID000003737 | CID000003741 | CID000003742 |
| CID000003767 | CID000003826 | CID000003877 | CID000003878 | CID000003929 |
| CID000003948 | CID000003958 | CID000004030 | CID000004032 | CID000004044 |
| CID000004046 | CID000004054 | CID000004058 | CID000004062 | CID000004100 |
| CID000004112 | CID000004158 | CID000004159 | CID000004178 | CID000004192 |
| CID000004200 | CID000004253 | CID000004259 | CID000004421 | CID000004425 |
| CID000004428 | CID000004440 | CID000004449 | CID000004539 | CID000004583 |
| CID000004614 | CID000004634 | CID000004666 | CID000004739 | CID000004834 |
| CID000004856 | CID000004894 | CID000004900 | CID000004914 | CID000004915 |

|              |              |              |              |              |
|--------------|--------------|--------------|--------------|--------------|
| CID000004917 | CID000004927 | CID000004943 | CID000005038 | CID000005071 |
| CID000005073 | CID000005077 | CID000005095 | CID000005195 | CID000005203 |
| CID000005210 | CID000005215 | CID000005291 | CID000005344 | CID000005352 |
| CID000005358 | CID000005394 | CID000005430 | CID000005479 | CID000005514 |
| CID000005523 | CID000005538 | CID000005544 | CID000005566 | CID000005647 |
| CID000005656 | CID000005718 | CID000005731 | CID000005771 | CID000005978 |
| CID000008612 | CID000009034 | CID000010100 | CID000010631 | CID000013342 |
| CID000016850 | CID000020585 | CID000027686 | CID000027991 | CID000031378 |
| CID000034312 | CID000039860 | CID000051634 | CID000054688 | CID000057469 |
| CID000057537 | CID000060164 | CID000060754 | CID000060787 | CID000060795 |
| CID000062959 | CID000071273 | CID000096312 | CID000119607 | CID000147912 |
| CID000148211 | CID000222786 | CID000477468 | CID005353980 |              |

(97)  $S_{97}$  : 173 drug compounds having side effect "Weight loss"

|              |              |              |              |              |
|--------------|--------------|--------------|--------------|--------------|
| CID000000085 | CID000000159 | CID000000444 | CID000000450 | CID000000767 |
| CID000001690 | CID000001935 | CID000001972 | CID000002118 | CID000002162 |
| CID000002179 | CID000002182 | CID000002187 | CID000002284 | CID000002369 |
| CID000002375 | CID000002477 | CID000002478 | CID000002512 | CID000002524 |
| CID000002550 | CID000002585 | CID000002771 | CID000002794 | CID000002801 |
| CID000002802 | CID000002818 | CID000002909 | CID000003007 | CID000003015 |
| CID000003032 | CID000003121 | CID000003143 | CID000003152 | CID000003154 |
| CID000003249 | CID000003261 | CID000003291 | CID000003345 | CID000003386 |
| CID000003404 | CID000003446 | CID000003449 | CID000003454 | CID000003467 |
| CID000003648 | CID000003652 | CID000003702 | CID000003750 | CID000003793 |
| CID000003825 | CID000003878 | CID000003899 | CID000003902 | CID000003911 |
| CID000003937 | CID000003964 | CID000004011 | CID000004075 | CID000004095 |
| CID000004158 | CID000004163 | CID000004205 | CID000004212 | CID000004236 |
| CID000004253 | CID000004409 | CID000004428 | CID000004449 | CID000004485 |
| CID000004493 | CID000004542 | CID000004583 | CID000004585 | CID000004594 |
| CID000004609 | CID000004614 | CID000004635 | CID000004679 | CID000004691 |
| CID000004723 | CID000004745 | CID000004920 | CID000005002 | CID000005029 |
| CID000005040 | CID000005064 | CID000005070 | CID000005073 | CID000005076 |
| CID000005077 | CID000005095 | CID000005155 | CID000005195 | CID000005203 |
| CID000005245 | CID000005291 | CID000005358 | CID000005372 | CID000005376 |
| CID000005394 | CID000005402 | CID000005426 | CID000005466 | CID000005478 |
| CID000005487 | CID000005496 | CID000005508 | CID000005514 | CID000005523 |
| CID000005533 | CID000005538 | CID000005572 | CID000005656 | CID000005672 |
| CID000005718 | CID000005719 | CID000005726 | CID000005732 | CID000005734 |
| CID000005735 | CID000005978 | CID000006476 | CID000010631 | CID000014888 |
| CID000023897 | CID000027661 | CID000028112 | CID000034312 | CID000040976 |
| CID000041317 | CID000042615 | CID000051634 | CID000057537 | CID000059708 |
| CID000060613 | CID000060787 | CID000060795 | CID000060953 | CID000062959 |
| CID000064147 | CID000065027 | CID000068740 | CID000071158 | CID000077993 |
| CID000082146 | CID000093860 | CID000104758 | CID000115237 | CID000119182 |

|              |              |              |              |              |
|--------------|--------------|--------------|--------------|--------------|
| CID000119607 | CID000122316 | CID000123631 | CID000125017 | CID000125889 |
| CID000147912 | CID000148192 | CID000150610 | CID000151165 | CID000176870 |
| CID000216239 | CID000216326 | CID002761171 | CID003062316 | CID003081884 |
| CID004659568 | CID004659569 | CID005281104 | CID005329102 | CID005481350 |
| CID006436173 | CID006918453 | CID009571074 |              |              |

(98)  $S_{98}$ : 175 drug compounds having side effect "Erythema multiforme"

|              |              |              |              |              |
|--------------|--------------|--------------|--------------|--------------|
| CID000000444 | CID000000450 | CID000001065 | CID000001690 | CID000001971 |
| CID000002022 | CID000002082 | CID000002141 | CID000002156 | CID000002162 |
| CID000002171 | CID000002173 | CID000002187 | CID000002250 | CID000002269 |
| CID000002274 | CID000002478 | CID000002520 | CID000002524 | CID000002550 |
| CID000002554 | CID000002576 | CID000002585 | CID000002609 | CID000002610 |
| CID000002617 | CID000002622 | CID000002631 | CID000002637 | CID000002646 |
| CID000002650 | CID000002655 | CID000002656 | CID000002658 | CID000002662 |
| CID000002666 | CID000002675 | CID000002676 | CID000002708 | CID000002720 |
| CID000002727 | CID000002751 | CID000002756 | CID000002762 | CID000002764 |
| CID000002771 | CID000002786 | CID000002800 | CID000002806 | CID000002818 |
| CID000002983 | CID000003032 | CID000003059 | CID000003075 | CID000003121 |
| CID000003143 | CID000003203 | CID000003222 | CID000003255 | CID000003279 |
| CID000003285 | CID000003305 | CID000003308 | CID000003324 | CID000003333 |
| CID000003367 | CID000003379 | CID000003386 | CID000003394 | CID000003403 |
| CID000003414 | CID000003440 | CID000003446 | CID000003512 | CID000003639 |
| CID000003672 | CID000003702 | CID000003706 | CID000003715 | CID000003793 |
| CID000003825 | CID000003826 | CID000003827 | CID000003883 | CID000003899 |
| CID000003911 | CID000003928 | CID000003937 | CID000003954 | CID000003956 |
| CID000003961 | CID000003962 | CID000004033 | CID000004036 | CID000004044 |
| CID000004046 | CID000004060 | CID000004064 | CID000004112 | CID000004158 |
| CID000004195 | CID000004200 | CID000004236 | CID000004409 | CID000004421 |
| CID000004463 | CID000004485 | CID000004509 | CID000004539 | CID000004583 |
| CID000004594 | CID000004603 | CID000004614 | CID000004679 | CID000004691 |
| CID000004834 | CID000004856 | CID000004889 | CID000004920 | CID000004946 |
| CID000004993 | CID000005029 | CID000005038 | CID000005039 | CID000005070 |
| CID000005073 | CID000005076 | CID000005203 | CID000005215 | CID000005291 |
| CID000005344 | CID000005352 | CID000005376 | CID000005394 | CID000005402 |
| CID000005426 | CID000005430 | CID000005472 | CID000005487 | CID000005508 |
| CID000005514 | CID000005578 | CID000005625 | CID000005647 | CID000005656 |
| CID000005735 | CID000010631 | CID000034312 | CID000050614 | CID000054454 |
| CID000054547 | CID000057469 | CID000060184 | CID000060198 | CID000060843 |
| CID000071616 | CID000072938 | CID000074989 | CID000083786 | CID000104865 |
| CID000119607 | CID000123631 | CID000130881 | CID000213039 | CID000216239 |
| CID000444013 | CID000477468 | CID003002190 | CID003062316 | CID004659568 |
| CID004659569 | CID005353980 | CID005381226 | CID006398970 | CID009571074 |

(99)  $S_{99}$ : 170 drug compounds having side effect "Gastritis"

|              |              |              |              |              |
|--------------|--------------|--------------|--------------|--------------|
| CID00000085  | CID000000159 | CID000000444 | CID000000450 | CID000000767 |
| CID000001125 | CID000001134 | CID000001690 | CID000001775 | CID000001935 |
| CID000001971 | CID000002099 | CID000002162 | CID000002182 | CID000002250 |
| CID000002269 | CID000002311 | CID000002375 | CID000002405 | CID000002519 |
| CID000002609 | CID000002662 | CID000002666 | CID000002678 | CID000002764 |
| CID000002771 | CID000002801 | CID000002802 | CID000002806 | CID000002895 |
| CID000002909 | CID000002958 | CID000003032 | CID000003059 | CID000003121 |
| CID000003152 | CID000003261 | CID000003305 | CID000003308 | CID000003339 |
| CID000003342 | CID000003386 | CID000003394 | CID000003403 | CID000003404 |
| CID000003410 | CID000003446 | CID000003449 | CID000003454 | CID000003475 |
| CID000003648 | CID000003672 | CID000003702 | CID000003793 | CID000003825 |
| CID000003826 | CID000003878 | CID000003883 | CID000003899 | CID000003929 |
| CID000003937 | CID000003957 | CID000003961 | CID000004044 | CID000004054 |
| CID000004075 | CID000004158 | CID000004205 | CID000004259 | CID000004409 |
| CID000004440 | CID000004449 | CID000004583 | CID000004585 | CID000004614 |
| CID000004635 | CID000004679 | CID000004691 | CID000004745 | CID000004775 |
| CID000004819 | CID000004856 | CID000004885 | CID000004920 | CID000004932 |
| CID000005002 | CID000005029 | CID000005040 | CID000005070 | CID000005073 |
| CID000005076 | CID000005077 | CID000005078 | CID000005090 | CID000005095 |
| CID000005195 | CID000005203 | CID000005210 | CID000005212 | CID000005245 |
| CID000005267 | CID000005291 | CID000005352 | CID000005358 | CID000005372 |
| CID000005379 | CID000005401 | CID000005402 | CID000005466 | CID000005508 |
| CID000005514 | CID000005523 | CID000005525 | CID000005538 | CID000005596 |
| CID000005625 | CID000005645 | CID000005656 | CID000005718 | CID000005719 |
| CID000005731 | CID000005732 | CID000005734 | CID000005735 | CID000005761 |
| CID000028112 | CID000034312 | CID000039042 | CID000039860 | CID000040976 |
| CID000041317 | CID000054454 | CID000054547 | CID000060613 | CID000060787 |
| CID000060795 | CID000060852 | CID000060953 | CID000062959 | CID000064147 |
| CID000065999 | CID000071158 | CID000072938 | CID000077993 | CID000083786 |
| CID000093860 | CID000110634 | CID000110635 | CID000119607 | CID000123606 |
| CID000125889 | CID000147912 | CID000148192 | CID000148211 | CID000150610 |
| CID000151165 | CID000170361 | CID000176870 | CID000197712 | CID000216239 |
| CID000216326 | CID003002190 | CID003062316 | CID003081884 | CID004659568 |
| CID005281104 | CID005487301 | CID005493381 | CID006323497 | CID009571074 |

(100)  $S_{100}$  : 166 drug compounds having side effect "Abnormal vision"

|              |              |              |              |              |
|--------------|--------------|--------------|--------------|--------------|
| CID000000450 | CID000000564 | CID000000807 | CID000000937 | CID000000942 |
| CID000001690 | CID000001972 | CID000001978 | CID000002156 | CID000002162 |
| CID000002182 | CID000002216 | CID000002267 | CID000002269 | CID000002284 |
| CID000002369 | CID000002375 | CID000002405 | CID000002435 | CID000002462 |
| CID000002512 | CID000002520 | CID000002578 | CID000002585 | CID000002678 |
| CID000002726 | CID000002751 | CID000002764 | CID000002769 | CID000002771 |
| CID000002794 | CID000002801 | CID000002909 | CID000002958 | CID000003015 |
| CID000003016 | CID000003032 | CID000003066 | CID000003121 | CID000003148 |

|              |              |              |              |              |
|--------------|--------------|--------------|--------------|--------------|
| CID000003152 | CID000003157 | CID000003203 | CID000003261 | CID000003279 |
| CID000003285 | CID000003339 | CID000003345 | CID000003355 | CID000003373 |
| CID000003386 | CID000003403 | CID000003404 | CID000003410 | CID000003419 |
| CID000003446 | CID000003454 | CID000003475 | CID000003510 | CID000003519 |
| CID000003648 | CID000003672 | CID000003724 | CID000003736 | CID000003746 |
| CID000003749 | CID000003793 | CID000003826 | CID000003878 | CID000003883 |
| CID000003911 | CID000003937 | CID000003948 | CID000004158 | CID000004159 |
| CID000004236 | CID000004259 | CID000004409 | CID000004449 | CID000004473 |
| CID000004485 | CID000004493 | CID000004542 | CID000004583 | CID000004585 |
| CID000004594 | CID000004609 | CID000004634 | CID000004635 | CID000004679 |
| CID000004691 | CID000004739 | CID000004745 | CID000004819 | CID000004889 |
| CID000004893 | CID000004920 | CID000004932 | CID000004943 | CID000004946 |
| CID000005002 | CID000005005 | CID000005029 | CID000005040 | CID000005073 |
| CID000005076 | CID000005077 | CID000005095 | CID000005195 | CID000005203 |
| CID000005210 | CID000005212 | CID000005358 | CID000005372 | CID000005379 |
| CID000005394 | CID000005401 | CID000005430 | CID000005466 | CID000005478 |
| CID000005512 | CID000005514 | CID000005516 | CID000005523 | CID000005538 |
| CID000005596 | CID000005636 | CID000005645 | CID000005656 | CID000005665 |
| CID000005718 | CID000005719 | CID000005732 | CID000027661 | CID000031477 |
| CID000034312 | CID000039860 | CID000040976 | CID000042615 | CID000057537 |
| CID000059768 | CID000060184 | CID000060612 | CID000060613 | CID000060754 |
| CID000060953 | CID000062959 | CID000064147 | CID000065999 | CID000071158 |
| CID000071616 | CID000072054 | CID000072938 | CID000077992 | CID000077993 |
| CID000110634 | CID000110635 | CID000119607 | CID000125889 | CID000158440 |
| CID003081884 | CID004183806 | CID005282044 | CID005282226 | CID005329102 |
| CID006918453 |              |              |              |              |
