# Supplementary material for: Predicting Drugs Side Effects Based on Chemical-Chemical Interactions and Protein-Chemical Interactions
Source: Hindawi journal article supplement (doi:10.1155/2013/485034), 2013-01-01
Supplement: f2 [file 485034.f2.pdf]

**Supplementary Material II:** Breakdown of the benchmark dataset **S** using the 100 side effects

| Tag      | Side effect      | Number of drugs |
|----------|------------------|-----------------|
| $C_1$    | Nausea           | 703             |
| $C_2$    | Headache         | 663             |
| $C_3$    | Vomiting         | 652             |
| $C_4$    | Rash             | 604             |
| $C_5$    | Dizziness        | 588             |
| $C_6$    | Diarrhea         | 582             |
| $C_7$    | Pruritus         | 561             |
| $C_8$    | Urticaria        | 490             |
| $C_9$    | Fever            | 480             |
| $C_{10}$ | Edema            | 461             |
| $C_{11}$ | Abdominal pain   | 448             |
| $C_{12}$ | Somnolence       | 447             |
| $C_{13}$ | Pain             | 431             |
| $C_{14}$ | Constipation     | 431             |
| $C_{15}$ | Dyspnea          | 409             |
| $C_{16}$ | Anorexia         | 409             |
| $C_{17}$ | Insomnia         | 409             |
| $C_{18}$ | Thrombocytopenia | 403             |
| $C_{19}$ | Paresthesia      | 393             |

|                 |                  |     |
|-----------------|------------------|-----|
| C <sub>20</sub> | Fatigue          | 385 |
| C <sub>21</sub> | Hypotension      | 378 |
| C <sub>22</sub> | Dyspepsia        | 360 |
| C <sub>23</sub> | Tachycardia      | 363 |
| C <sub>24</sub> | Hypersensitivity | 361 |
| C <sub>25</sub> | Confusion        | 363 |
| C <sub>26</sub> | Leukopenia       | 360 |
| C <sub>27</sub> | Dry mouth        | 354 |
| C <sub>28</sub> | Cough            | 341 |
| C <sub>29</sub> | Asthenia         | 347 |
| C <sub>30</sub> | Arthralgia       | 344 |
| C <sub>31</sub> | Vertigo          | 337 |
| C <sub>32</sub> | Myalgia          | 331 |
| C <sub>33</sub> | Anxiety          | 334 |
| C <sub>34</sub> | Syncope          | 328 |
| C <sub>35</sub> | Hypertension     | 325 |
| C <sub>36</sub> | Anemia           | 326 |
| C <sub>37</sub> | Chest pain       | 322 |
| C <sub>38</sub> | Infection        | 299 |
| C <sub>39</sub> | Palpitations     | 302 |
| C <sub>40</sub> | Alopecia         | 308 |
| C <sub>41</sub> | Malaise          | 301 |

|                 |                   |     |
|-----------------|-------------------|-----|
| C <sub>42</sub> | Allergic reaction | 302 |
| C <sub>43</sub> | Back pain         | 292 |
| C <sub>44</sub> | Tremor            | 296 |
| C <sub>45</sub> | Nervousness       | 288 |
| C <sub>46</sub> | Hemorrhage        | 282 |
| C <sub>47</sub> | Arrhythmia        | 284 |
| C <sub>48</sub> | Tinnitus          | 276 |
| C <sub>49</sub> | Anaphylaxis       | 273 |
| C <sub>50</sub> | Blurred vision    | 276 |
| C <sub>51</sub> | Flatulence        | 268 |
| C <sub>52</sub> | Flushing          | 266 |
| C <sub>53</sub> | Pharyngitis       | 259 |
| C <sub>54</sub> | Angioedema        | 262 |
| C <sub>55</sub> | Jaundice          | 260 |
| C <sub>56</sub> | Rhinitis          | 257 |
| C <sub>57</sub> | Erythema          | 252 |
| C <sub>58</sub> | Agitation         | 256 |
| C <sub>59</sub> | Hepatitis         | 241 |
| C <sub>60</sub> | Sweating          | 243 |
| C <sub>61</sub> | Influenza         | 236 |
| C <sub>62</sub> | Seizures          | 241 |
| C <sub>63</sub> | Sinusitis         | 225 |

|                 |                            |     |
|-----------------|----------------------------|-----|
| C <sub>64</sub> | Hallucinations             | 232 |
| C <sub>65</sub> | Bradycardia                | 225 |
| C <sub>66</sub> | Hematuria                  | 220 |
| C <sub>67</sub> | Conjunctivitis             | 221 |
| C <sub>68</sub> | Agranulocytosis            | 228 |
| C <sub>69</sub> | Weakness                   | 227 |
| C <sub>70</sub> | Chills                     | 219 |
| C <sub>71</sub> | Peripheral edema           | 208 |
| C <sub>72</sub> | Epistaxis                  | 216 |
| C <sub>73</sub> | Photosensitivity           | 211 |
| C <sub>74</sub> | Hyperglycemia              | 204 |
| C <sub>75</sub> | Pneumonia                  | 201 |
| C <sub>76</sub> | Myocardial infarction      | 199 |
| C <sub>77</sub> | Pancreatitis               | 199 |
| C <sub>78</sub> | Neutropenia                | 199 |
| C <sub>79</sub> | Weight gain                | 204 |
| C <sub>80</sub> | Stomatitis                 | 194 |
| C <sub>81</sub> | Stevens - Johnson syndrome | 196 |
| C <sub>82</sub> | Impotence                  | 195 |
| C <sub>83</sub> | Eosinophilia               | 196 |
| C <sub>84</sub> | Urinary tract infection    | 186 |
| C <sub>85</sub> | Purpura                    | 192 |

|                  |                                   |        |
|------------------|-----------------------------------|--------|
| C <sub>86</sub>  | Increased sweating                | 184    |
| C <sub>87</sub>  | Dysuria                           | 181    |
| C <sub>88</sub>  | Bronchitis                        | 184    |
| C <sub>89</sub>  | Dermatitis                        | 188    |
| C <sub>90</sub>  | Angina pectoris                   | 181    |
| C <sub>91</sub>  | Asthma                            | 180    |
| C <sub>92</sub>  | Urinary frequency                 | 178    |
| C <sub>93</sub>  | Upper respiratory tract infection | 176    |
| C <sub>94</sub>  | Ataxia                            | 182    |
| C <sub>95</sub>  | Dysphagia                         | 177    |
| C <sub>96</sub>  | Convulsions                       | 179    |
| C <sub>97</sub>  | Weight loss                       | 173    |
| C <sub>98</sub>  | Erythema multiforme               | 175    |
| C <sub>99</sub>  | Gastritis                         | 170    |
| C <sub>100</sub> | Abnormal vision                   | 166    |
| Total            | ----                              | 30,114 |
