# Supplementary material for: Predicting Drugs Side Effects Based on Chemical-Chemical Interactions and Protein-Chemical Interactions
Source: Hindawi journal article supplement (doi:10.1155/2013/485034), 2013-01-01
Supplement: f3 [file 485034.f3.pdf]

**Supplementary Material III:** The prediction accuracies of the interaction-based and similarity-based method in identifying drugs side effects.

| Prediction order | Interaction-based |              | Similarity-based |              |
|------------------|-------------------|--------------|------------------|--------------|
|                  | Training dataset  | Test dataset | Training dataset | Test dataset |
| 1                | 0.863032          | 0.891566     | 0.836436         | 0.879518     |
| 2                | 0.804521          | 0.831325     | 0.791223         | 0.831325     |
| 3                | 0.771277          | 0.843373     | 0.75             | 0.795181     |
| 4                | 0.726064          | 0.819277     | 0.714096         | 0.759036     |
| 5                | 0.734043          | 0.771084     | 0.682181         | 0.746988     |
| 6                | 0.6875            | 0.759036     | 0.668883         | 0.710843     |
| 7                | 0.676862          | 0.674699     | 0.647606         | 0.578313     |
| 8                | 0.642287          | 0.650602     | 0.599734         | 0.650602     |
| 9                | 0.636968          | 0.686747     | 0.587766         | 0.578313     |
| 10               | 0.577128          | 0.578313     | 0.573138         | 0.60241      |
| 11               | 0.591755          | 0.60241      | 0.56383          | 0.674699     |
| 12               | 0.591755          | 0.698795     | 0.566489         | 0.518072     |
| 13               | 0.573138          | 0.614458     | 0.547872         | 0.53012      |
| 14               | 0.558511          | 0.590361     | 0.538564         | 0.626506     |
| 15               | 0.541223          | 0.542169     | 0.506649         | 0.578313     |
| 16               | 0.538564          | 0.590361     | 0.526596         | 0.554217     |
| 17               | 0.513298          | 0.39759      | 0.5              | 0.60241      |
| 18               | 0.545213          | 0.626506     | 0.517287         | 0.53012      |

|    |          |          |          |          |
|----|----------|----------|----------|----------|
| 19 | 0.5      | 0.566265 | 0.5      | 0.385542 |
| 20 | 0.472074 | 0.445783 | 0.477394 | 0.518072 |
| 21 | 0.477394 | 0.457831 | 0.456117 | 0.578313 |
| 22 | 0.510638 | 0.506024 | 0.482713 | 0.566265 |
| 23 | 0.472074 | 0.46988  | 0.478723 | 0.518072 |
| 24 | 0.441489 | 0.481928 | 0.472074 | 0.481928 |
| 25 | 0.469415 | 0.542169 | 0.442819 | 0.506024 |
| 26 | 0.428191 | 0.554217 | 0.452128 | 0.421687 |
| 27 | 0.444149 | 0.53012  | 0.461436 | 0.421687 |
| 28 | 0.444149 | 0.481928 | 0.457447 | 0.421687 |
| 29 | 0.402926 | 0.493976 | 0.412234 | 0.46988  |
| 30 | 0.410904 | 0.493976 | 0.412234 | 0.481928 |
| 31 | 0.421543 | 0.433735 | 0.425532 | 0.493976 |
| 32 | 0.385638 | 0.421687 | 0.404255 | 0.421687 |
| 33 | 0.404255 | 0.39759  | 0.400266 | 0.457831 |
| 34 | 0.378989 | 0.39759  | 0.412234 | 0.493976 |
| 35 | 0.357713 | 0.421687 | 0.396277 | 0.46988  |
| 36 | 0.361702 | 0.349398 | 0.344415 | 0.409639 |
| 37 | 0.393617 | 0.421687 | 0.371011 | 0.457831 |
| 38 | 0.353723 | 0.337349 | 0.37367  | 0.421687 |
| 39 | 0.381649 | 0.361446 | 0.382979 | 0.373494 |
| 40 | 0.359043 | 0.39759  | 0.347074 | 0.506024 |

|    |          |          |          |          |
|----|----------|----------|----------|----------|
| 41 | 0.327128 | 0.337349 | 0.336436 | 0.421687 |
| 42 | 0.337766 | 0.385542 | 0.357713 | 0.349398 |
| 43 | 0.337766 | 0.409639 | 0.382979 | 0.409639 |
| 44 | 0.308511 | 0.337349 | 0.324468 | 0.409639 |
| 45 | 0.333777 | 0.373494 | 0.356383 | 0.409639 |
| 46 | 0.344415 | 0.337349 | 0.329787 | 0.39759  |
| 47 | 0.328457 | 0.313253 | 0.351064 | 0.301205 |
| 48 | 0.301862 | 0.313253 | 0.3125   | 0.445783 |
| 49 | 0.305851 | 0.26506  | 0.347074 | 0.325301 |
| 50 | 0.31117  | 0.349398 | 0.324468 | 0.313253 |
| 51 | 0.300532 | 0.325301 | 0.325798 | 0.26506  |
| 52 | 0.284574 | 0.349398 | 0.329787 | 0.361446 |
| 53 | 0.303191 | 0.325301 | 0.307181 | 0.277108 |
| 54 | 0.288564 | 0.349398 | 0.331117 | 0.277108 |
| 55 | 0.271277 | 0.337349 | 0.303191 | 0.385542 |
| 56 | 0.259309 | 0.301205 | 0.297872 | 0.277108 |
| 57 | 0.261968 | 0.26506  | 0.31117  | 0.277108 |
| 58 | 0.272606 | 0.277108 | 0.291223 | 0.289157 |
| 59 | 0.275266 | 0.192771 | 0.304521 | 0.325301 |
| 60 | 0.232713 | 0.301205 | 0.268617 | 0.228916 |
| 61 | 0.231383 | 0.228916 | 0.287234 | 0.289157 |
| 62 | 0.25266  | 0.289157 | 0.261968 | 0.277108 |

|    |          |          |          |          |
|----|----------|----------|----------|----------|
| 63 | 0.244681 | 0.228916 | 0.292553 | 0.313253 |
| 64 | 0.269947 | 0.180723 | 0.239362 | 0.325301 |
| 65 | 0.242021 | 0.216867 | 0.295213 | 0.253012 |
| 66 | 0.236702 | 0.228916 | 0.259309 | 0.204819 |
| 67 | 0.24734  | 0.228916 | 0.253989 | 0.277108 |
| 68 | 0.210106 | 0.168675 | 0.235372 | 0.192771 |
| 69 | 0.196809 | 0.240964 | 0.234043 | 0.277108 |
| 70 | 0.224734 | 0.240964 | 0.261968 | 0.180723 |
| 71 | 0.214096 | 0.253012 | 0.24867  | 0.240964 |
| 72 | 0.222074 | 0.216867 | 0.234043 | 0.301205 |
| 73 | 0.191489 | 0.216867 | 0.243351 | 0.253012 |
| 74 | 0.199468 | 0.240964 | 0.244681 | 0.180723 |
| 75 | 0.214096 | 0.277108 | 0.240691 | 0.253012 |
| 76 | 0.19016  | 0.228916 | 0.238032 | 0.216867 |
| 77 | 0.191489 | 0.168675 | 0.227394 | 0.192771 |
| 78 | 0.171543 | 0.277108 | 0.214096 | 0.192771 |
| 79 | 0.172872 | 0.13253  | 0.239362 | 0.277108 |
| 80 | 0.183511 | 0.228916 | 0.234043 | 0.253012 |
| 81 | 0.154255 | 0.180723 | 0.224734 | 0.240964 |
| 82 | 0.155585 | 0.240964 | 0.199468 | 0.192771 |
| 83 | 0.144947 | 0.180723 | 0.216755 | 0.228916 |
| 84 | 0.144947 | 0.240964 | 0.236702 | 0.253012 |

|     |          |          |          |          |
|-----|----------|----------|----------|----------|
| 85  | 0.178191 | 0.156627 | 0.223404 | 0.289157 |
| 86  | 0.162234 | 0.156627 | 0.206117 | 0.168675 |
| 87  | 0.166223 | 0.084337 | 0.199468 | 0.228916 |
| 88  | 0.136968 | 0.13253  | 0.199468 | 0.228916 |
| 89  | 0.12633  | 0.13253  | 0.207447 | 0.240964 |
| 90  | 0.140957 | 0.168675 | 0.208777 | 0.192771 |
| 91  | 0.12766  | 0.144578 | 0.206117 | 0.168675 |
| 92  | 0.12234  | 0.13253  | 0.199468 | 0.180723 |
| 93  | 0.119681 | 0.156627 | 0.208777 | 0.204819 |
| 94  | 0.117021 | 0.168675 | 0.191489 | 0.144578 |
| 95  | 0.107713 | 0.13253  | 0.182181 | 0.204819 |
| 96  | 0.103723 | 0.108434 | 0.171543 | 0.144578 |
| 97  | 0.105053 | 0.120482 | 0.180851 | 0.144578 |
| 98  | 0.105053 | 0.108434 | 0.167553 | 0.156627 |
| 99  | 0.082447 | 0.060241 | 0.158245 | 0.156627 |
| 100 | 0.055851 | 0.060241 | 0.136968 | 0.108434 |
